# Supplementary material for: Organocatalytic asymmetric synthesis of atropisomeric tetraarylethenes: design, properties, and applications
Source: Royal Society of Chemistry journal article supplement (doi:10.1039/d6sc03274e), 2026-06-05
Supplement: d6sc03274e1.pdf [file d6sc03274e1.pdf]

## Supplementary information

### Organocatalytic Asymmetric Synthesis of Atropisomeric Tetraarylethenes: Design, Properties, and Applications

#### Table of Contents

|                                                                                             |     |
|---------------------------------------------------------------------------------------------|-----|
| 1. General Information .....                                                                | 2   |
| 2. General Procedure for Synthesis of Starting Materials .....                              | 3   |
| 3. Experimental Procedures and Characterization of Products .....                           | 9   |
| 4. Synthestic Applications .....                                                            | 36  |
| 5. Mechanistic Experiments .....                                                            | 41  |
| 6. Copies of Optical Spectras .....                                                         | 48  |
| 7. Copies of <sup>1</sup> H NMR, <sup>13</sup> C NMR and <sup>19</sup> F NMR Spectras ..... | 51  |
| 8. Copies of HPLC Spectras .....                                                            | 110 |
| 9. Crystallographic Data .....                                                              | 153 |
| 10. Reference .....                                                                         | 164 |

## 1. General Information

Unless stated otherwise, all reagents were purchased from commercial sources and used without further purification. Solvents were dried and distilled before use by standard procedures. Reactions were monitored by thin layer chromatography (TLC) using silica gel plates. Flash column chromatography was performed over silica gel (200-300 mesh).  $^1\text{H}$  NMR spectra were recorded on a Bruker Avance operating at for  $^1\text{H}$  NMR at 400 MHz and 600 MHz,  $^{13}\text{C}$  NMR at 101 MHz and 151 MHz,  $^{19}\text{F}$  NMR at 565 MHz and 367 MHz, and chemical shifts ( $\delta$ ) are reported in ppm relative to those of residual solvent signals:  $\text{CDCl}_3$  ( $^1\text{H}$  NMR  $\delta$  7.26,  $^{13}\text{C}$  NMR  $\delta$  77.00), DMSO- $d_6$  ( $^1\text{H}$  NMR  $\delta$  2.5,  $^{13}\text{C}$  NMR  $\delta$  39.5). All coupling constants ( $J$ ) are reported in Hz. The following abbreviations were used to describe peak splitting patterns when appropriate: s = singlet, d = doublet, t = triplet, q = quartet, m = multiplet, br = broad. HRMS were recorded on Waters Xevo G2-XS QToF mass spectrometer. The enantiomeric excesses of the products were determined by HPLC analysis on Shimadzu LC-20AT using Chiralpak AD-H (4.6 mm  $\Phi$   $\times$  250 mmL), OD-H (4.6 mm  $\Phi$   $\times$  250 mmL), IA (4.6 mm  $\Phi$   $\times$  250 mmL), IC (4.6 mm  $\Phi$   $\times$  250 mmL), OX-H (4.6 mm  $\Phi$   $\times$  250 mmL) columns purchased from Daicel Chemical Industries. Unless otherwise noted, materials were purchased from Energy Chemical Co., Bidepharm, Alfa Aesar, and other commercial suppliers and used as received. Solvents were dried over sodium (for THF, dioxane, toluene) and freshly distilled prior to use. Compound **S-1** were prepared following a literature procedure (28).

## 2. General Procedure for Synthesis of Starting Materials

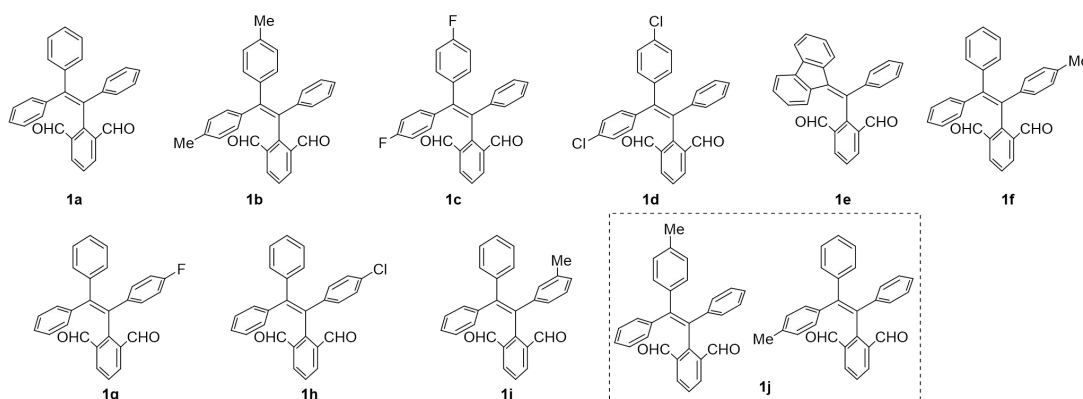

### Procedure A:

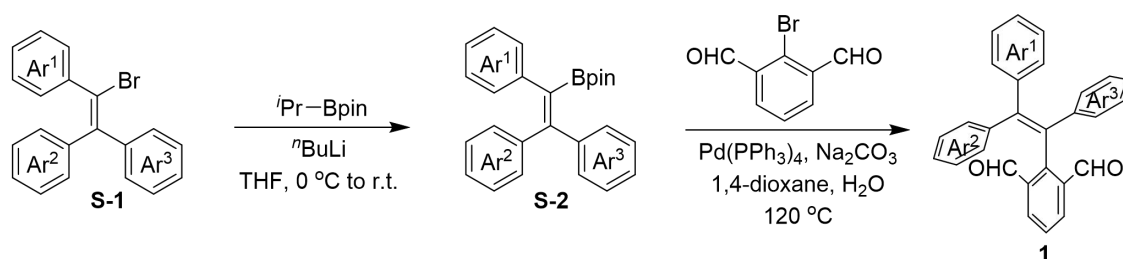

Under a nitrogen atmosphere, THF was added to a round-bottomed flask containing **S-1** (8 mmol). The mixture was cooled to  $-78\text{ }^{\circ}\text{C}$ , then  $n\text{-BuLi}$  (1.1 equiv.) was added followed by 2-Isopropoxy-4,4,5,5-tetramethyl-1,3,2-dioxaborolane (1.2 equiv.). The mixture was stirred for 20 minutes. The temperature was raised to room temperature and  $\text{H}_2\text{O}$  (40 mL) was added. The mixture was stirred for 15 minutes, the aqueous phase was extracted with ethyl acetate ( $20\text{ mL} \times 3$ ) and the combined organic layer was washed with brine ( $10\text{ mL} \times 3$ ), then dried over  $\text{Na}_2\text{SO}_4$ . The solvent was evaporated and the residue was purified by silica gel column chromatography. Under a nitrogen atmosphere, 1,4-dioxane was added to a pressure-resistant bottle containing **S-2** (1.5 equiv.), 2-Bromoisophthalaldehyde (1 equiv.) and  $\text{Pd}(\text{PPh}_3)_4$  (0.05 equiv.), followed by the addition of a sodium carbonate aqueous solution. The mixture was stirred at  $120\text{ }^{\circ}\text{C}$  for 24 h, The aqueous phase was extracted with ethyl acetate ( $20\text{ mL} \times 3$ ) and the combined organic layer was washed with brine ( $10\text{ mL} \times 3$ ), then dried over  $\text{Na}_2\text{SO}_4$ . The solvent was evaporated and the residue was purified by silica gel column chromatography to give the corresponding brominated product **1**.

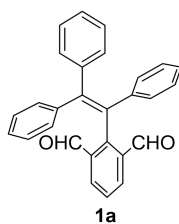

**2-(1,2,2-triphenylvinyl)isophthalaldehyde (1a)** was synthesized by following Procedure A. The crude material was purified by column chromatography to provide **1a** as a yellow solid (338 mg, 87% yield).

**<sup>1</sup>H NMR** (600 MHz, CDCl<sub>3</sub>) δ 10.47 (d, *J* = 0.7 Hz, 2H), 8.04 (d, *J* = 7.7 Hz, 2H), 7.48 – 7.43 (m, 1H), 7.23 – 7.17 (m, 3H), 7.15 – 7.09 (m, 5H), 7.06 – 7.02 (m, 3H), 7.01 – 6.98 (m, 2H), 6.93 – 6.87 (m, 2H).

**<sup>13</sup>C NMR** (151 MHz, CDCl<sub>3</sub>) δ 190.4, 148.4, 141.1, 139.3, 137.4, 136.6, 134.2, 134.0, 129.8, 129.3, 128.9, 127.3, 126.9, 125.1, 124.4, 119.8, 119.7.

**HRMS:** (ESI) *m/z*: [M+H]<sup>+</sup> Calcd for C<sub>28</sub>H<sub>21</sub>O<sub>2</sub><sup>+</sup> 389.1536; Found 389.1529.

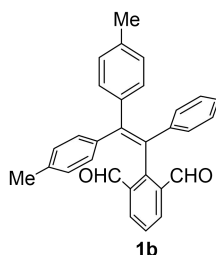

**2-(1-phenyl-2,2-di-p-tolylvinyl)isophthalaldehyde (1b)** was synthesized by following Procedure A. The crude material was purified by column chromatography to provide **1b** as a yellow solid (291 mg, 70% yield).

**<sup>1</sup>H NMR** (600 MHz, CDCl<sub>3</sub>) δ 10.45 (d, *J* = 0.8 Hz, 2H), 8.04 (d, *J* = 7.7 Hz, 2H), 7.48 – 7.42 (m, 1H), 7.14 – 7.09 (m, 3H), 7.02 – 6.99 (m, 4H), 6.98 – 6.94 (m, 2H), 6.85 – 6.81 (m, 2H), 6.77 – 6.74 (m, 2H), 2.31 (s, 3H), 2.17 (s, 3H).

**<sup>13</sup>C NMR** (151 MHz, CDCl<sub>3</sub>) δ 191.2, 149.4, 147.1, 142.2, 139.2, 138.7, 137.2, 134.9, 133.3, 130.8, 130.4, 129.9, 128.8, 128.3, 128.0, 127.2, 21.1.

**HRMS:** (ESI) *m/z*: [M+H]<sup>+</sup> Calcd for C<sub>30</sub>H<sub>25</sub>O<sub>2</sub><sup>+</sup> 417.1849; Found 417.1841.

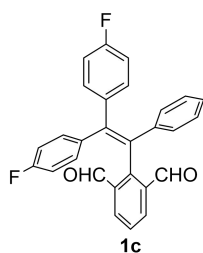

**2-(2,2-bis(4-fluorophenyl)-1-phenylvinyl)isophthalaldehyde (1c)** was synthesized by following Procedure A. The crude material was purified by column chromatography to provide **1c** as a yellow solid (373 mg, 88% yield).

**<sup>1</sup>H NMR** (600 MHz, CDCl<sub>3</sub>) δ 10.38 (d, *J* = 0.7 Hz, 2H), 8.05 (s, 1H), 8.03 (s, 1H), 7.51 – 7.48 (m, 1H), 7.16 – 7.11 (m, 3H), 7.10 – 7.06 (m, 2H), 6.98 – 6.95 (m, 2H), 6.92 – 6.87 (m, 2H), 6.86 – 6.83 (m, 2H), 6.76 – 6.71 (m, 2H).

**<sup>13</sup>C NMR** (151 MHz, CDCl<sub>3</sub>) δ 192.3, 162.0, 161.9, 161.1 (dd, *J* = 245.3, 25.9 Hz), 160.4, 160.2, 150.8, 143.1, 142.4, 141.7, 140.6, 139.5, 138.6, 138.3, 134.4, 134.2, 132.8 (d, *J* = 8.0 Hz), 132.3, 131.4 (d, *J* = 8.0 Hz), 130.3, 128.1, 128.0, 127.2, 126.8, 115.2 (d, *J* = 21.5 Hz), 114.9 (d, *J* = 21.5 Hz), 114.5, 113.0, 55.2, 44.8.

**<sup>19</sup>F NMR** (565 MHz, CDCl<sub>3</sub>) δ -112.8, -112.9.

**HRMS:** (ESI) *m/z*: [M+H]<sup>+</sup> Calcd for C<sub>28</sub>H<sub>19</sub>F<sub>2</sub>O<sub>2</sub><sup>+</sup> 425.1348; Found 425.1338.

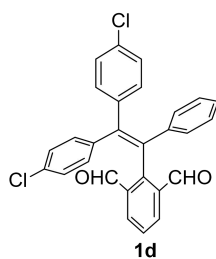

**2-(2,2-bis(4-chlorophenyl)-1-phenylvinyl)isophthalaldehyde (1d)** was synthesized by following Procedure A. The crude material was purified by column chromatography to provide **1d** as a yellow solid (319 mg, 70% yield).

**<sup>1</sup>H NMR** (600 MHz, CDCl<sub>3</sub>) δ 10.36 (s, 2H), 8.04 (d, *J* = 7.7 Hz, 2H), 7.52 (t, *J* = 7.7 Hz, 1H), 7.19 – 7.16 (m, 2H), 7.14 (dd, *J* = 5.0, 1.8 Hz, 3H), 7.04 – 7.00 (m, 4H), 6.98 – 6.94 (m, 2H), 6.81 – 6.77 (m, 2H).

**<sup>13</sup>C NMR** (151 MHz, CDCl<sub>3</sub>) δ 190.7, 147.6, 143.7, 140.9, 140.2, 139.6, 134.9, 134.1, 133.8, 133.6, 133.1, 132.2, 131.2, 130.4.

**HRMS:** (ESI) *m/z*: [M+H]<sup>+</sup> Calcd for C<sub>28</sub>H<sub>19</sub>Cl<sub>2</sub>O<sub>2</sub><sup>+</sup> 457.0757; Found 457.0749.

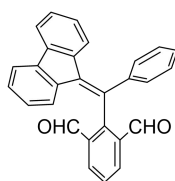

**1e**

**2-((9H-fluoren-9-ylidene)(phenyl)methyl)isophthalaldehyde (1e)** was synthesized by following Procedure A. The crude material was purified by column chromatography to provide **1e** as a yellow solid (251 mg, 65% yield).

**<sup>1</sup>H NMR** (600 MHz, CDCl<sub>3</sub>) δ 10.37 (d, *J* = 0.8 Hz, 2H), 8.35 (d, *J* = 7.8 Hz, 2H), 7.78 – 7.73 (m, 1H), 7.71 – 7.66 (m, 2H), 7.46 – 7.41 (m, 5H), 7.34 – 7.30 (m, 1H), 7.27 – 7.23 (m, 1H), 7.04 – 6.99 (m, 2H), 6.88 – 6.85 (m, 1H), 6.02 (dd, *J* = 7.9, 0.9 Hz, 1H).

**<sup>13</sup>C NMR** (151 MHz, CDCl<sub>3</sub>) δ 190.4, 148.4, 141.1, 139.3, 137.4, 136.6, 134.2, 134.0, 129.8, 129.3, 128.9, 127.3, 126.9, 125.1, 124.4, 119.8, 119.7.

**HRMS:** (ESI) *m/z*: [M+H]<sup>+</sup> Calcd for C<sub>28</sub>H<sub>19</sub>O<sub>2</sub><sup>+</sup> 387.1380; Found 387.1373.

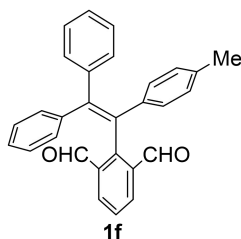

**1f**

**2-(2,2-diphenyl-1-(p-tolyl)vinyl)isophthalaldehyde (1f)** was synthesized by following Procedure A. The crude material was purified by column chromatography to provide **1f** as a yellow solid (289 mg, 72% yield).

**<sup>1</sup>H NMR** (600 MHz, CDCl<sub>3</sub>) δ 10.45 (d, *J* = 0.8 Hz, 2H), 8.03 (d, *J* = 7.7 Hz, 2H), 7.46 – 7.43 (m, 1H), 7.23 – 7.19 (m, 3H), 7.15 – 7.12 (m, 2H), 7.05 – 7.01 (m, 3H), 6.93 – 6.90 (m, 2H), 6.89 – 6.84 (m, 4H), 2.24 (s, 3H).

**<sup>13</sup>C NMR** (151 MHz, CDCl<sub>3</sub>) δ 191.1, 149.1, 146.2, 142.1, 141.7, 137.4, 135.0, 133.2, 131.4, 130.8, 130.2, 129.9, 129.1, 128.2, 128.1, 128.1, 127.5, 127.3, 21.1.

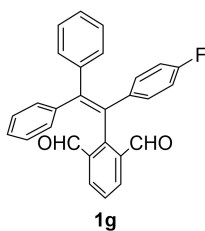

**2-(1-(4-fluorophenyl)-2,2-diphenylvinyl)isophthalaldehyde (1g)** was synthesized by following Procedure A. The crude material was purified by column chromatography to provide **1g** as a yellow solid (333 mg, 82% yield).

**<sup>1</sup>H NMR** (600 MHz, CDCl<sub>3</sub>) δ 10.42 (d, *J* = 0.8 Hz, 2H), 8.03 (d, *J* = 7.7 Hz, 2H), 51 – 7.43 (m, 1H), 7.24 – 7.19 (m, 3H), 7.13 – 7.11 (m, 2H), 7.05 – 7.02 (m, 3H), 6.97 – 6.94 (m, 2H), 6.90 – 6.85 (m, 2H), 6.83 – 6.79 (m, 2H). **<sup>13</sup>C NMR** (151 MHz, CDCl<sub>3</sub>) δ 190.8, 161.6 (d, *J* = 249.1 Hz), 148.2, 146.7, 141.9, 141.3, 137.7 (d, *J* = 3.5 Hz), 134.9, 133.8, 132.2 (d, *J* = 8.0 Hz), 130.8, 130.5, 129.8, 128.3 (d, *J* = 2.3 Hz), 128.2, 127.8, 127.5, 115.4 (d, *J* = 21.6 Hz).

**<sup>19</sup>F NMR** (565 MHz, CDCl<sub>3</sub>) δ -113.1.

**HRMS:** (ESI) *m/z*: [M+H]<sup>+</sup> Calcd for C<sub>28</sub>H<sub>20</sub>FO<sub>2</sub><sup>+</sup> 407.1442; Found 407.1441.

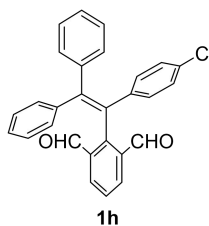

**2-(1-(4-chlorophenyl)-2,2-diphenylvinyl)isophthalaldehyde (1h)** was synthesized by following Procedure A. The crude material was purified by column chromatography to provide **1h** as a yellow solid (308 mg, 73% yield).

**<sup>1</sup>H NMR** (600 MHz, CDCl<sub>3</sub>) δ 10.51 – 10.34 (m, 2H), 8.04 (d, *J* = 2.3 Hz, 1H), 8.03 (d, *J* = 2.3 Hz, 1H), 7.50 – 7.44 (m, 1H), 7.25 – 7.19 (m, 3H), 7.13 – 7.11 (m, 3H), 7.09 – 7.08 (m, 1H), 7.06 – 7.03 (m, 3H), 7.02 – 6.93 (m, 1H), 6.92 – 6.86 (m, 3H).

**<sup>13</sup>C NMR** (151 MHz, CDCl<sub>3</sub>) δ 190.7, 147.9, 147.1, 141.8, 141.2, 140.1, 135.0, 133.9, 133.4, 131.7, 130.8, 129.8, 128.5, 128.4, 128.2, 127.9, 127.6, 127.4.

**HRMS:** (ESI) *m/z*: [M+H]<sup>+</sup> Calcd for C<sub>28</sub>H<sub>20</sub>ClO<sub>2</sub><sup>+</sup> 423.1146; Found 423.1139.

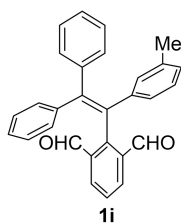

**2-(2,2-diphenyl-1-(m-tolyl)vinyl)isophthalaldehyde (1i)** was synthesized by following Procedure A. The crude material was purified by column chromatography to provide **1i** as a yellow solid (225 mg, 56% yield).

**<sup>1</sup>H NMR** (600 MHz, CDCl<sub>3</sub>) δ 10.47 (d, *J* = 0.8 Hz, 2H), 8.04 (d, *J* = 7.7 Hz, 2H), 7.47 – 7.44 (m, 1H), 7.22 – 7.18 (m, 3H), 7.13 – 7.10 (m, 2H), 7.05 – 7.02 (m, 3H), 7.00 (t, *J* = 7.7 Hz, 1H), 6.93 – 6.91 (m, 1H), 6.90 – 6.86 (m, 2H), 6.80 – 6.77 (m, 1H), 6.75 – 6.73 (m, 1H), 2.12 (s, 3H).

**<sup>13</sup>C NMR** (151 MHz, CDCl<sub>3</sub>) δ 191.1, 148.9, 146.7, 142.1, 141.6, 137.9, 135.0, 133.3, 131.5, 130.9, 130.8, 129.9, 128.3, 128.2, 128.1, 127.6, 127.6, 127.4, 21.3.

**HRMS:** (ESI) *m/z*: [M+H]<sup>+</sup> Calcd for C<sub>29</sub>H<sub>23</sub>O<sub>2</sub><sup>+</sup> 403.1693; Found 403.1686.

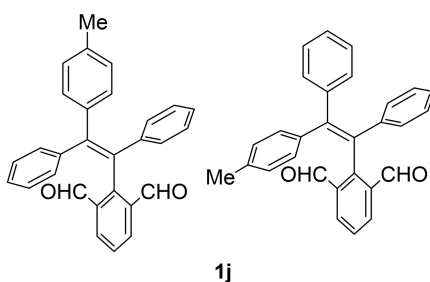

**2-(1,2-diphenyl-2-(p-tolyl)vinyl)isophthalaldehyde (1j)** was synthesized by following Procedure A. The crude material was purified by column chromatography to provide **1j** as a yellow solid (269 mg, 67% yield).

**<sup>1</sup>H NMR** (600 MHz, CDCl<sub>3</sub>) δ 10.46 (d, *J* = 0.8 Hz, 2H), 8.06 – 8.00 (m, 2H), 7.51 – 7.39 (m, 1H), 7.21 – 7.19 (m, 1H), 7.13 – 7.10 (m, 4H), 7.04 – 7.02 (m, 1H), 7.01 – 6.98 (m, 3H), 6.98 – 6.96 (m, 1H), 6.90 – 6.87 (m, 1H), 6.85 – 6.82 (m, 1H), 6.78 – 6.75 (m, 1H), 2.43 – 2.05 (m, 3H).

**<sup>13</sup>C NMR** (151 MHz, CDCl<sub>3</sub>) δ 191.1, 149.1, 149.0, 146.94, 146.9, 142.2, 141.9, 141.7, 139.0, 138.5, 137.6, 137.3, 135.0, 134.9, 133.4, 133.3, 130.9, 130.8, 130.39, 130.36, 129.93, 129.9, 128.9, 128.33, 128.29, 128.13, 128.12, 128.08, 128.07, 127.6, 127.4, 127.32, 127.30, 21.2, 21.1.

**HRMS:** (ESI) *m/z*: [M+H]<sup>+</sup> Calcd for C<sub>29</sub>H<sub>23</sub>O<sub>2</sub><sup>+</sup> 403.1693; Found 403.1686.

### 3. Experimental Procedures and Characterization of Products.

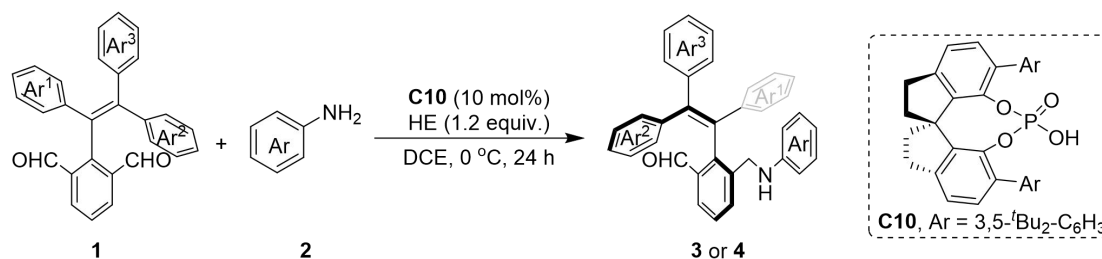

#### Procedure B:

Under air atmosphere, TAE dialdehyde **1** (0.1 mmol), aromatic amine **2** (0.1 mmol, 1.0 equiv.), **C10** (6.9 mg, 0.01 mmol, 10 mol%) and HE (30.4 mg, 0.12 mmol, 1.2 equiv.) were placed in a reaction tube and anhydrous DCE (1.0 mL) was added into this reaction mixture via syringe, and stirred at 0 °C for 24 h. After completion of the reaction, the crude mixture was purified by column chromatography on silica gel to afford the corresponding product **3** or **4**.

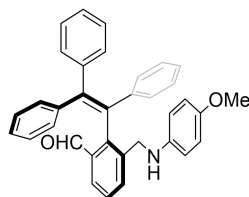

#### (*S*)-3-(((4-methoxyphenyl)amino)methyl)-2-(1,2,2-triphenylvinyl)benzaldehyde

(**3a**) was synthesized by following Procedure B. The crude material was purified by column chromatography (SiO<sub>2</sub>, petroleum ether: EtOAc = 10:1) to provide **3a** as a yellow solid (35.6 mg, 72% yield).

<sup>1</sup>H NMR (400 MHz, (CD<sub>3</sub>)<sub>2</sub>SO) δ 10.36 (s, 1H), 7.60 – 7.50 (m, 1H), 7.34 (t, *J* = 7.7 Hz, 1H), 7.23 – 7.19 (m, 3H), 7.16 – 7.08 (m, 9H), 7.01 – 6.97 (m, 2H), 6.94 – 6.89 (m, 2H), 6.57 (d, *J* = 8.9 Hz, 2H), 6.11 – 6.06 (m, 2H), 5.80 (s, 1H), 4.32 – 4.20 (m, 1H), 4.12 – 4.05 (m, 1H), 3.58 (s, 3H).

<sup>13</sup>C NMR (101 MHz, (CD<sub>3</sub>)<sub>2</sub>SO) δ 192.1, 150.8, 144.0, 143.6, 142.4, 142.3, 142.1, 140.7, 139.6, 134.1, 133.6, 132.2, 130.7, 130.3, 129.2, 128.2, 128.0, 127.9, 127.8, 127.3, 127.0, 126.3, 114.5, 113.0, 55.2, 44.9.

**Optical** [ $\alpha$ ]<sub>D</sub><sup>25</sup> = -3.22 (c = 0.12, CH<sub>2</sub>Cl<sub>2</sub>, 93% ee).

**HPLC** (IA, *i*PrOH/*n*-hexane = 30/70, flow rate = 0.8 mL/min, 254 nm) *t*<sub>R</sub> = 7.9 min (major), 7.5 min (minor).

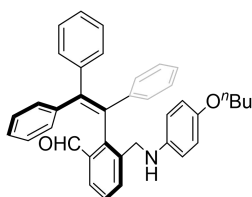

**(S)-3-(((4-butoxyphenyl)amino)methyl)-2-(1,2,2-triphenylvinyl)benzaldehyde (3b)** was synthesized by following Procedure B. The crude material was purified by column chromatography (SiO<sub>2</sub>, Toluene) to provide **3b** as a yellow solid (34.9 mg, 65% yield).

<sup>1</sup>H NMR (400 MHz, (CD<sub>3</sub>)<sub>2</sub>SO) δ 10.36 (s, 1H), 7.60 – 7.50 (m, 2H), 7.33 (d, *J* = 3.2 Hz, 1H), 7.23 – 7.20 (m, 4H), 7.14 – 7.09 (m, 9H), 7.00 – 6.97 (m, 3H), 6.93 – 6.90 (m, 2H), 6.57 – 6.53 (m, 3H), 6.09 – 6.04 (m, 2H), 5.78 (q, *J* = 7.3, 6.7 Hz, 1H), 4.32 – 4.17 (m, 2H), 4.14 – 4.03 (m, 1H), 3.99 – 3.92 (m, 1H), 1.62 – 1.57 (m, 2H), 1.40 – 1.36 (m, 4H), 0.92 – 0.88 (m, 3H).

<sup>13</sup>C NMR (101 MHz, (CD<sub>3</sub>)<sub>2</sub>SO) δ 192.1, 150.1, 143.9, 143.6, 142.4, 142.3, 142.1, 140.7, 139.6, 134.1, 133.6, 132.2, 130.6, 130.3, 129.2, 128.1, 128.0, 127.9, 127.2, 126.3, 122.2, 122.0, 115.3, 113.0, 67.5, 44.8, 31.0, 18.8, 13.7.

**Optical** [ $\alpha$ ]<sub>D</sub><sup>25</sup> = -0.09 (c = 0.04, CH<sub>2</sub>Cl<sub>2</sub>, 91% ee).

**HPLC** (OD-H, <sup>i</sup>PrOH/n-hexane = 20/80, flow rate = 0.5 mL/min, 254 nm) t<sub>R</sub> = 10.2 min (major), 11.4 min (minor).

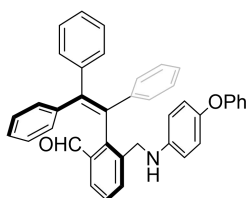

**(S)-3-(((4-phenoxyphenyl)amino)methyl)-2-(1,2,2-triphenylvinyl)benzaldehyde (3c)** was synthesized by following Procedure B. The crude material was purified by column chromatography (SiO<sub>2</sub>, petroleum ether: EtOAc = 10:1) to provide **3c** as a yellow solid (38.2 mg, 69% yield).

<sup>1</sup>H NMR (400 MHz, (CD<sub>3</sub>)<sub>2</sub>SO) δ 10.36 (s, 1H), 7.59 (dd, *J* = 7.6, 4.5 Hz, 2H), 7.38 (t, *J* = 7.7 Hz, 1H), 7.31 – 7.20 (m, 6H), 7.16 – 7.08 (m, 8H), 7.01 – 6.98 (m, 3H), 6.93 (d, *J* = 4.3 Hz, 1H), 6.81 (d, *J* = 7.9 Hz, 2H), 6.70 – 6.67 (m, 2H), 6.18 – 6.09 (m, 3H), 4.36 – 4.29 (m, 1H), 4.23 – 4.15 (m, 1H).

$^{13}\text{C}$  NMR (101 MHz,  $(\text{CD}_3)_2\text{SO}$ )  $\delta$  192.1, 158.8, 145.7, 145.2, 144.1, 143.7, 142.3, 142.1, 140.7, 139.2, 134.2, 133.6, 132.1, 130.7, 130.3, 129.7, 129.2, 128.2, 128.0, 127.9, 127.3, 127.0, 126.5, 121.9, 120.9, 116.5, 112.9, 79.2, 44.6.

**Optical**  $[\alpha]_{\text{D}}^{25} = -6.80$  ( $c = 0.18$ ,  $\text{CH}_2\text{Cl}_2$ , 91% ee).

**HPLC** (IA,  $i\text{PrOH/n-hexane} = 30/70$ , flow rate = 0.8 mL/min, 254 nm)  $t_{\text{R}} = 6.7$  min (major), 7.0 min (minor).

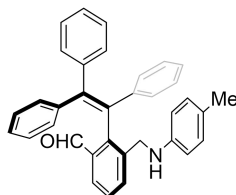

**(S)-3-((p-tolylamino)methyl)-2-(1,2,2-triphenylvinyl)benzaldehyde (3d)** was synthesized by following Procedure B. The crude material was purified by column chromatography ( $\text{SiO}_2$ , petroleum ether: EtOAc = 10:1) to provide **3d** as a yellow solid (32.3 mg, 67% yield).

$^1\text{H}$  NMR (400 MHz,  $(\text{CD}_3)_2\text{SO}$ )  $\delta$  10.36 (s, 1H), 7.60 – 7.54 (m, 1H), 7.51 (d,  $J = 7.6$  Hz, 1H), 7.33 (t,  $J = 7.6$  Hz, 1H), 7.22 (t,  $J = 3.5$  Hz, 3H), 7.17 – 7.08 (m, 9H), 7.02 – 6.97 (m, 2H), 6.95 – 6.89 (m, 2H), 6.73 (d,  $J = 8.0$  Hz, 2H), 6.05 – 5.97 (m, 2H), 4.36 – 4.20 (m, 1H), 4.16 – 4.06 (m, 1H), 2.08 (s, 3H).

$^{13}\text{C}$  NMR (101 MHz,  $(\text{CD}_3)_2\text{SO}$ )  $\delta$  192.1, 145.9, 144.0, 143.6, 142.3, 142.1, 140.7, 139.5, 134.1, 133.6, 132.1, 130.7, 130.3, 129.3, 129.2, 128.2, 128.0, 127.9, 127.8, 127.3, 127.0, 126.3, 124.3, 112.1, 44.3, 20.0.

**HRMS:** (ESI)  $m/z$ :  $[\text{M}+\text{H}]^+$  Calcd for  $\text{C}_{35}\text{H}_{30}\text{NO}^+$  480.2322; Found 480.2316.

**Optical**  $[\alpha]_{\text{D}}^{25} = -4.03$  ( $c = 0.15$ ,  $\text{CH}_2\text{Cl}_2$ , 91% ee).

**HPLC** (IA,  $i\text{PrOH/n-hexane} = 20/80$ , flow rate = 0.5 mL/min, 254 nm)  $t_{\text{R}} = 12.5$  min (major), 11.9 min (minor).

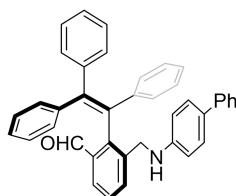

**(S)-3-(((1,1'-biphenyl)-4-ylamino)methyl)-2-(1,2,2-triphenylvinyl)benzaldehyde (3e)** was synthesized by following Procedure B. The crude material was purified by

column chromatography (SiO<sub>2</sub>, petroleum ether: EtOAc = 10:1) to provide **3e** as a yellow solid (43.9 mg, 81% yield).

**<sup>1</sup>H NMR** (400 MHz, (CD<sub>3</sub>)<sub>2</sub>SO) δ 10.38 (s, 1H), 7.62 – 7.57 (m, 1H), 7.55 (d, *J* = 7.7 Hz, 1H), 7.52 – 7.46 (m, 2H), 7.38 – 7.32 (m, 3H), 7.29 – 7.25 (m, 2H), 7.21 (d, *J* = 8.1 Hz, 4H), 7.18 – 7.11 (m, 8H), 7.05 – 7.00 (m, 2H), 6.98 – 6.92 (m, 2H), 6.43 (s, 1H), 6.30 – 6.09 (m, 2H), 4.49 – 4.34 (m, 1H), 4.27 – 4.13 (m, 1H).

**<sup>13</sup>C NMR** (101 MHz, (CD<sub>3</sub>)<sub>2</sub>SO) δ 192.1, 147.8, 144.1, 143.6, 142.4, 142.1, 140.7, 140.4, 139.1, 134.2, 133.6, 132.0, 130.7, 130.3, 129.2, 128.7, 128.2, 128.05, 127.98, 127.8, 127.32, 127.28, 127.2, 127.1, 126.5, 125.8, 125.4, 112.4, 44.1.

**HRMS:** (ESI) *m/z*: [M+H]<sup>+</sup> Calcd for C<sub>40</sub>H<sub>32</sub>NO<sup>+</sup> 542.2478; Found 542.2473.

**Optical** [α]<sub>D</sub><sup>25</sup> = -7.11 (c = 0.17, CH<sub>2</sub>Cl<sub>2</sub>, 91% ee).

**HPLC** (OD-H, <sup>i</sup>PrOH/n-hexane = 20/80, flow rate = 0.5 mL/min, 254 nm) t<sub>R</sub> = 17.0 min (major), 16.0 min (minor).

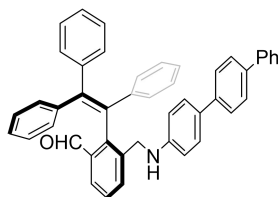

**(S)-3-(((1,1':4',1''-terphenyl)-4-ylamino)methyl)-2-(1,2,2-triphenylvinyl)benzaldehyde (3f)** was synthesized by following Procedure B. The crude material was purified by column chromatography (SiO<sub>2</sub>, petroleum ether: EtOAc = 10:1) to provide **3f** as a yellow solid (41.4 mg, 67% yield).

**<sup>1</sup>H NMR** (400 MHz, (CD<sub>3</sub>)<sub>2</sub>SO) δ 10.39 (s, 1H), 7.69 – 7.64 (m, 4H), 7.63 – 7.59 (m, 3H), 7.58 – 7.53 (m, 1H), 7.45 (t, *J* = 7.7 Hz, 2H), 7.39 – 7.30 (m, 4H), 7.25 – 7.20 (m, 3H), 7.19 – 7.11 (m, 8H), 7.06 – 7.00 (m, 2H), 6.99 – 6.94 (m, 2H), 6.48 (s, 1H), 6.29 – 6.19 (m, 2H), 4.47 – 4.37 (m, 1H), 4.28 – 4.10 (m, 1H).

**<sup>13</sup>C NMR** (101 MHz, (CD<sub>3</sub>)<sub>2</sub>SO) δ 192.1, 148.0, 144.1, 143.6, 142.4, 142.1, 140.7, 139.8, 139.5, 139.1, 137.4, 134.2, 133.6, 132.0, 130.7, 130.3, 129.2, 128.9, 128.2, 128.1, 128.0, 127.32, 127.27, 127.27, 127.21, 127.1, 127.0, 126.5, 126.4, 125.8, 112.4, 79.2, 44.1.

**HRMS:** (ESI) *m/z*: [M+H]<sup>+</sup> Calcd for C<sub>46</sub>H<sub>36</sub>NO<sup>+</sup> 618.2791; Found 618.2787.

**Optical** [α]<sub>D</sub><sup>25</sup> = -3.19 (c = 0.14, CH<sub>2</sub>Cl<sub>2</sub>, 90% ee).

**HPLC** (IA, <sup>i</sup>PrOH/n-hexane = 30/70, flow rate = 0.8 mL/min, 254 nm) t<sub>R</sub> = 9.4 min

(major), 9.0 min (minor).

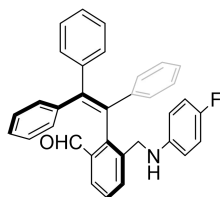

**(S)-3-(((4-fluorophenyl)amino)methyl)-2-(1,2,2-triphenylvinyl)benzaldehyde (3g)** was synthesized by following Procedure B. The crude material was purified by column chromatography (SiO<sub>2</sub>, petroleum ether: EtOAc = 10:1) to provide **3g** as a yellow solid (38.5 mg, 80% yield). The compound was reduced to the corresponding alcohol for NMR analysis.

**<sup>1</sup>H NMR** (600 MHz, (CD<sub>3</sub>)<sub>2</sub>SO) δ 7.32 (d, *J* = 7.6 Hz, 1H), 7.23 – 7.17 (m, 4H), 7.13 – 7.04 (m, 9H), 6.97 – 6.92 (m, 4H), 6.76 – 6.67 (m, 2H), 6.06 – 5.98 (m, 3H), 5.22 – 5.17 (m, 1H), 4.49 – 4.41 (m, 1H), 4.39 – 4.32 (m, 1H), 4.19 – 4.12 (m, 2H).

**<sup>13</sup>C NMR** (101 MHz, (CD<sub>3</sub>)<sub>2</sub>SO) δ 154.1 (d, *J* = 231.0 Hz), 145.2, 142.8, 142.6, 141.9, 140.7, 140.5, 138.0, 136.5, 135.7, 130.9, 130.2, 129.3, 128.2, 127.7 (d, *J* = 7.5 Hz), 127.0, 126.7, 124.6, 124.4, 115.1 (d, *J* = 21.9 Hz), 112.6 (d, *J* = 7.2 Hz), 61.0, 45.0.

**<sup>19</sup>F NMR** (565 MHz, (CD<sub>3</sub>)<sub>2</sub>SO) δ -129.9.

**HRMS:** (ESI) *m/z*: [M+H]<sup>+</sup> Calcd for C<sub>34</sub>H<sub>27</sub>FNO<sup>+</sup> 484.2071; Found 484.2065.

**Optical** [ $\alpha$ ]<sub>D</sub><sup>25</sup> = -1.48 (c = 0.13, CH<sub>2</sub>Cl<sub>2</sub>, 93% ee).

**HPLC** (AD-H, <sup>*i*</sup>PrOH/n-hexane = 20/80, flow rate = 0.5 mL/min, 254 nm) *t*<sub>R</sub> = 13.0 min (major), 12.2 min (minor).

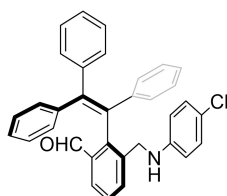

**(S)-3-(((4-chlorophenyl)amino)methyl)-2-(1,2,2-triphenylvinyl)benzaldehyde (3h)** was synthesized by following Procedure B. The crude material was purified by column chromatography (SiO<sub>2</sub>, petroleum ether: EtOAc = 10:1) to provide **3h** as a yellow solid (40.0 mg, 80% yield).

**<sup>1</sup>H NMR** (400 MHz, (CD<sub>3</sub>)<sub>2</sub>SO) δ 10.36 (s, 1H), 7.58 (dd, *J* = 7.7, 1.4 Hz, 1H), 7.48 (dd, *J* = 7.7, 1.4 Hz, 1H), 7.35 (t, *J* = 7.7 Hz, 1H), 7.22 (dd, *J* = 5.9, 1.6 Hz, 3H), 7.16

– 7.09 (m, 8H), 7.01 – 6.97 (m, 2H), 6.94 – 6.90 (m, 4H), 6.43 (t,  $J = 6.0$  Hz, 1H), 6.09 – 5.95 (m, 2H), 4.36 – 4.28 (m, 1H), 4.19 – 4.10 (m, 1H).

$^{13}\text{C}$  NMR (101 MHz,  $(\text{CD}_3)_2\text{SO}$ )  $\delta$  192.1, 147.1, 144.1, 143.7, 142.3, 142.0, 140.7, 138.7, 134.3, 133.5, 131.9, 130.7, 130.3, 129.2, 128.5, 128.2, 128.03, 127.96, 127.30, 127.28, 127.1, 126.5, 119.2, 113.3, 44.0.

**HRMS:** (ESI)  $m/z$ :  $[\text{M}+\text{H}]^+$  Calcd for  $\text{C}_{34}\text{H}_{27}\text{ClNO}^+$  500.1776; Found 500.1770.

**Optical**  $[\alpha]_{\text{D}}^{25} = -3.67$  ( $c = 0.13$ ,  $\text{CH}_2\text{Cl}_2$ , 90% ee).

**HPLC** (IA,  $i\text{PrOH}/n\text{-hexane} = 20/80$ , flow rate = 0.5 mL/min, 254 nm)  $t_{\text{R}} = 13.0$  min (major), 12.0 min (minor).

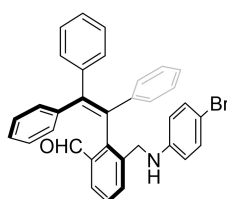

**(S)-3-(((4-bromophenyl)amino)methyl)-2-(1,2,2-triphenylvinyl)benzaldehyde (3i)** was synthesized by following Procedure B. The crude material was purified by column chromatography ( $\text{SiO}_2$ , petroleum ether: EtOAc = 10:1) to provide **3i** as a yellow solid (33.1 mg, 61% yield).

$^1\text{H}$  NMR (400 MHz,  $(\text{CD}_3)_2\text{SO}$ )  $\delta$  10.35 (s, 1H), 7.58 (dd,  $J = 7.7, 1.4$  Hz, 1H), 7.47 (dd,  $J = 7.8, 1.5$  Hz, 1H), 7.35 (t,  $J = 7.7$  Hz, 1H), 7.25 – 7.20 (m, 3H), 7.17 – 7.08 (m, 8H), 7.05 – 7.01 (m, 2H), 7.00 – 6.97 (m, 2H), 6.94 – 6.90 (m, 2H), 6.47 (t,  $J = 6.0$  Hz, 1H), 6.05 – 5.91 (m, 2H), 4.37 – 4.27 (m, 1H), 4.18 – 4.09 (m, 1H).

$^{13}\text{C}$  NMR (101 MHz,  $(\text{CD}_3)_2\text{SO}$ )  $\delta$  192.1, 147.5, 144.1, 143.7, 142.3, 142.0, 140.7, 138.7, 134.3, 133.5, 131.9, 131.3, 130.7, 130.3, 129.2, 128.2, 128.04, 127.97, 127.31, 127.28, 127.1, 126.5, 113.9, 106.6, 43.9.

**HRMS:** (ESI)  $m/z$ :  $[\text{M}+\text{H}]^+$  Calcd for  $\text{C}_{34}\text{H}_{27}\text{BrNO}^+$  544.1271; Found 544.1265.

**Optical**  $[\alpha]_{\text{D}}^{25} = -2.03$  ( $c = 0.12$ ,  $\text{CH}_2\text{Cl}_2$ , 90% ee).

**HPLC** (IA,  $i\text{PrOH}/n\text{-hexane} = 20/80$ , flow rate = 0.5 mL/min, 254 nm)  $t_{\text{R}} = 13.3$  min (major), 12.4 min (minor).



<sup>13</sup>C NMR (101 MHz, (CD<sub>3</sub>)<sub>2</sub>SO) δ 193.4, 192.1, 152.5, 144.2, 143.6, 142.3, 142.0, 140.6, 138.8, 138.2, 134.4, 133.4, 132.3, 131.8, 131.2, 130.7, 130.3, 129.2, 128.8, 128.20, 128.15, 128.1, 128.04, 128.96, 127.3, 127.1, 126.7, 124.3, 110.9, 43.5.

**HRMS:** (ESI) m/z: [M+H]<sup>+</sup> Calcd for C<sub>41</sub>H<sub>32</sub>NO<sub>2</sub><sup>+</sup> 570.2428; Found 570.2422

**Optical** [α]<sub>D</sub><sup>25</sup> = -5.47 (c = 0.15, CH<sub>2</sub>Cl<sub>2</sub>, 89% ee).

**HPLC** (AD-H, <sup>i</sup>PrOH/n-hexane = 20/80, flow rate = 0.5 mL/min, 254 nm) t<sub>R</sub> = 21.5 min (major), 18.8 min (minor).

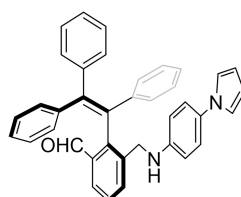

**(S)-3-(((4-(1H-pyrrol-1-yl)phenyl)amino)methyl)-2-(1,2,2-triphenylvinyl)benzaldehyde (31)** was synthesized by following Procedure B. The crude material was purified by column chromatography (SiO<sub>2</sub>, petroleum ether: EtOAc = 10:1) to provide **31** as a yellow solid (43.6 mg, 82% yield).

<sup>1</sup>H NMR (400 MHz, (CD<sub>3</sub>)<sub>2</sub>SO) δ 10.38 (s, 1H), 7.59 (dd, *J* = 7.6, 1.4 Hz, 1H), 7.55 (dd, *J* = 7.7, 1.4 Hz, 1H), 7.36 (t, *J* = 7.7 Hz, 1H), 7.25 – 7.20 (m, 3H), 7.18 – 7.09 (m, 9H), 7.09 – 7.05 (m, 3H), 7.04 – 6.99 (m, 2H), 6.97 – 6.92 (m, 2H), 6.34 (t, *J* = 6.0 Hz, 1H), 6.24 – 6.09 (m, 4H), 4.43 – 4.30 (m, 1H), 4.26 – 4.09 (m, 1H).

<sup>13</sup>C NMR (101 MHz, (CD<sub>3</sub>)<sub>2</sub>SO) δ 192.1, 146.3, 144.1, 143.7, 142.3, 142.0, 140.7, 139.0, 134.2, 133.6, 132.0, 130.7, 130.3, 130.2, 129.2, 128.2, 128.04, 127.97, 127.31, 127.26, 127.1, 126.4, 121.1, 119.0, 112.5, 109.2, 79.2, 44.3.

**HRMS:** (ESI) m/z: [M+H]<sup>+</sup> Calcd for C<sub>38</sub>H<sub>31</sub>N<sub>2</sub>O<sup>+</sup> 531.2431; Found 531.2427.

**Optical** [α]<sub>D</sub><sup>25</sup> = -3.22 (c = 0.13, CH<sub>2</sub>Cl<sub>2</sub>, 89% ee).

**HPLC** (OX-H, <sup>i</sup>PrOH/n-hexane = 20/80, flow rate = 0.5 mL/min, 254 nm) t<sub>R</sub> = 16.1 min (major), 18.5 min (minor).

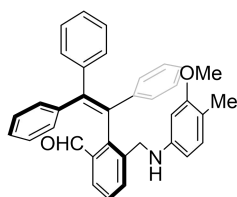

**(S)-3-(((3-methoxy-4-methylphenyl)amino)methyl)-2-(1,2,2-triphenylvinyl)benzaldehyde (3m)** was synthesized by following Procedure B. The crude material was purified by column chromatography (SiO<sub>2</sub>, petroleum ether: EtOAc = 10:1) to provide **3m** as a yellow solid (35.2 mg, 69% yield).

<sup>1</sup>H NMR (400 MHz, (CD<sub>3</sub>)<sub>2</sub>SO) δ 10.35 (s, 1H), 7.59 – 7.52 (m, 2H), 7.35 (t, *J* = 7.7 Hz, 1H), 7.25 – 7.19 (m, 3H), 7.16 – 7.11 (m, 5H), 7.10 – 7.07 (m, 3H), 7.02 – 6.97 (m, 2H), 6.94 – 6.88 (m, 2H), 6.64 (d, *J* = 8.1 Hz, 1H), 6.03 – 5.97 (m, 2H), 5.51 (dd, *J* = 8.0, 2.1 Hz, 1H), 4.35 – 4.26 (m, 1H), 4.14 – 4.06 (m, 1H), 3.57 (s, 3H), 1.93 (s, 3H).

<sup>13</sup>C NMR (101 MHz, (CD<sub>3</sub>)<sub>2</sub>SO) δ 192.1, 157.8, 147.9, 144.0, 143.5, 142.3, 142.1, 140.8, 139.5, 134.1, 133.6, 132.1, 130.7, 130.5, 130.2, 129.2, 128.2, 128.0, 127.9, 127.8, 127.3, 127.0, 126.3, 112.9, 103.2, 95.9, 54.8, 44.4, 15.2.

**HRMS:** (ESI) *m/z*: [M+H]<sup>+</sup> Calcd for C<sub>36</sub>H<sub>32</sub>NO<sub>2</sub><sup>+</sup> 510.2428; Found 510.2423.

**Optical** [α]<sub>D</sub><sup>25</sup> = -3.38 (c = 0.14, CH<sub>2</sub>Cl<sub>2</sub>, 91% ee).

**HPLC** (AD-H, <sup>i</sup>PrOH/n-hexane = 20/80, flow rate = 0.5 mL/min, 254 nm) t<sub>R</sub> = 15.2 min (major), 13.9 min (minor).

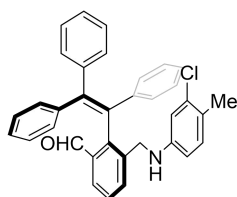

**(S)-3-(((3-chloro-4-methylphenyl)amino)methyl)-2-(1,2,2-triphenylvinyl)benzaldehyde (3n)** was synthesized by following Procedure B. The crude material was purified by column chromatography (SiO<sub>2</sub>, Toluene) to provide **3n** as a yellow solid (37.0 mg, 72% yield).

<sup>1</sup>H NMR (600 MHz, (CD<sub>3</sub>)<sub>2</sub>SO) δ 10.36 (s, 1H), 7.58 (dd, *J* = 7.7, 1.4 Hz, 1H), 7.47 (dd, *J* = 7.7, 1.4 Hz, 1H), 7.35 (t, *J* = 7.7 Hz, 1H), 7.26 – 7.17 (m, 3H), 7.15 – 7.12 (m, 4H), 7.14 – 7.06 (m, 3H), 7.03 – 6.96 (m, 2H), 6.93 – 6.91 (m, 2H), 6.91 – 6.83 (m,

1H), 6.37 (s, 1H), 6.23 (d,  $J = 2.4$  Hz, 1H), 5.99 (dd,  $J = 8.3, 2.4$  Hz, 1H), 4.36 – 4.26 (m, 1H), 4.13 – 4.04 (m, 1H), 2.10 (s, 3H).

$^{13}\text{C}$  NMR (151 MHz,  $(\text{CD}_3)_2\text{SO}$ )  $\delta$  192.1, 147.7, 144.2, 143.6, 142.3, 142.0, 140.6, 138.8, 134.2, 133.5, 133.5, 131.8, 131.3, 130.7, 130.3, 129.2, 128.2, 128.1, 127.9, 127.4, 127.3, 127.1, 126.4, 121.8, 111.7, 111.1, 44.1, 18.4.

**HRMS:** (ESI)  $m/z$ :  $[\text{M}+\text{H}]^+$  Calcd for  $\text{C}_{35}\text{H}_{29}\text{ClNO}^+$  514.1932; Found 514.1928.

**Optical**  $[\alpha]_{\text{D}}^{25} = -7.37$  ( $c = 0.17$ ,  $\text{CH}_2\text{Cl}_2$ , 91% ee).

**HPLC** (IA,  $i\text{PrOH/n-hexane} = 20/80$ , flow rate = 0.5 mL/min, 254 nm)  $t_{\text{R}} = 13.7$  min (major), 12.3 min (minor).

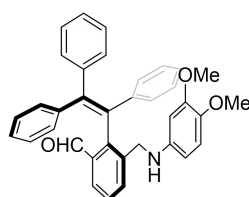

**(S)-3-(((3,4-dimethoxyphenyl)amino)methyl)-2-(1,2,2-triphenylvinyl)benzaldehyde (3o)** was synthesized by following Procedure B. The crude material was purified by column chromatography ( $\text{SiO}_2$ , petroleum ether: EtOAc = 5:1) to provide **3o** as a yellow solid (36.8 mg, 70% yield).

$^1\text{H}$  NMR (600 MHz,  $(\text{CD}_3)_2\text{SO}$ )  $\delta$  10.35 (s, 1H), 7.58 – 7.54 (m, 2H), 7.38 – 7.32 (m, 1H), 7.25 – 7.19 (m, 3H), 7.16 – 7.11 (m, 5H), 7.10 – 7.07 (m, 3H), 7.02 – 6.98 (m, 2H), 6.94 – 6.86 (m, 2H), 6.58 – 6.49 (m, 1H), 6.18 – 6.02 (m, 1H), 5.57 – 5.46 (m, 1H), 4.34 – 4.24 (m, 1H), 4.13 – 4.04 (m, 1H), 3.60 – 3.52 (m, 6H).

$^{13}\text{C}$  NMR (151 MHz,  $(\text{CD}_3)_2\text{SO}$ )  $\delta$  192.1, 149.9, 144.1, 143.6, 142.4, 142.1, 139.5, 134.1, 133.6, 132.2, 130.7, 130.3, 129.2, 128.2, 128.0, 127.91, 127.86, 127.3, 127.0, 126.3, 114.3, 102.5, 98.8, 56.5, 55.2, 44.9.

**HRMS:** (ESI)  $m/z$ :  $[\text{M}+\text{H}]^+$  Calcd for  $\text{C}_{36}\text{H}_{32}\text{NO}_3^+$  526.2377; Found 526.2373.

**Optical**  $[\alpha]_{\text{D}}^{25} = -8.99$  ( $c = 0.18$ ,  $\text{CH}_2\text{Cl}_2$ , 92% ee).

**HPLC** (OX-H,  $i\text{PrOH/n-hexane} = 20/80$ , flow rate = 0.5 mL/min, 254 nm)  $t_{\text{R}} = 36.6$  min (major), 34.0 min (minor).

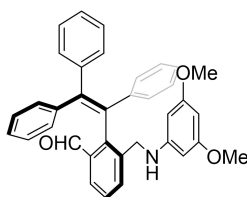

**(S)-3-(((3,5-dimethoxyphenyl)amino)methyl)-2-(1,2,2-triphenylvinyl)benzaldehyde (3p)** was synthesized by following Procedure B. The crude material was purified by column chromatography (SiO<sub>2</sub>, petroleum ether: EtOAc = 10:1) to provide **3p** as a yellow solid (42.1 mg, 80% yield).

<sup>1</sup>H NMR (400 MHz, (CD<sub>3</sub>)<sub>2</sub>SO) δ 10.34 (s, 1H), 7.56 (dd, *J* = 7.7, 1.4 Hz, 1H), 7.50 (dd, *J* = 7.7, 1.4 Hz, 1H), 7.36 (t, *J* = 7.7 Hz, 1H), 7.24 – 7.20 (m, 3H), 7.13 (dd, *J* = 5.0, 2.1 Hz, 5H), 7.08 (t, *J* = 3.3 Hz, 3H), 7.02 – 6.97 (m, 2H), 6.93 – 6.87 (m, 2H), 6.21 (t, *J* = 6.1 Hz, 1H), 5.72 (t, *J* = 2.1 Hz, 1H), 5.50 (d, *J* = 2.1 Hz, 2H), 4.36 – 4.21 (m, 1H), 4.04 – 3.96 (m, 1H), 3.57 (s, 6H).

<sup>13</sup>C NMR (101 MHz, (CD<sub>3</sub>)<sub>2</sub>SO) δ 192.0, 161.2, 150.3, 144.2, 143.5, 142.3, 142.1, 140.7, 139.3, 134.1, 133.6, 132.0, 130.7, 130.2, 129.1, 128.2, 128.0, 127.9, 127.33, 127.28, 127.1, 126.3, 90.9, 88.8, 54.7, 44.3.

**HRMS:** (ESI) *m/z*: [M+H]<sup>+</sup> Calcd for C<sub>36</sub>H<sub>32</sub>NO<sub>3</sub><sup>+</sup> 526.2377; Found 526.2372.

**Optical** [ $\alpha$ ]<sub>D</sub><sup>25</sup> = -5.36 (*c* = 0.14, CH<sub>2</sub>Cl<sub>2</sub>, 91% ee).

**HPLC** (IA, <sup>i</sup>PrOH/n-hexane = 30/70, flow rate = 0.8 mL/min, 254 nm) *t*<sub>R</sub> = 8.0 min (major), 8.8 min (minor).

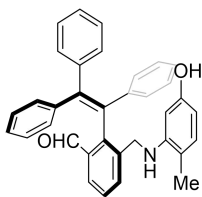

**(S)-3-(((5-hydroxy-2-methylphenyl)amino)methyl)-2-(1,2,2-triphenylvinyl)benzaldehyde (3q)** was synthesized by following Procedure B for 72 h. The crude material was purified by column chromatography (SiO<sub>2</sub>, petroleum ether: EtOAc = 5:1) to provide **3q** as a yellow solid (33.2 mg, 67% yield).

<sup>1</sup>H NMR (400 MHz, (CD<sub>3</sub>)<sub>2</sub>SO) δ 10.35 (s, 1H), 8.65 (s, 1H), 7.55 (dd, *J* = 7.7, 1.5 Hz, 1H), 7.45 (dd, *J* = 7.7, 1.5 Hz, 1H), 7.34 (t, *J* = 7.7 Hz, 1H), 7.24 – 7.20 (m, 3H), 7.15 – 7.08 (m, 8H), 7.04 – 7.00 (m, 2H), 6.96 – 6.91 (m, 2H), 6.71 (dd, *J* = 7.8, 0.8

Hz, 1H), 5.92 (dd,  $J = 7.9, 2.3$  Hz, 1H), 5.42 (d,  $J = 2.3$  Hz, 1H), 5.32 (t,  $J = 5.9$  Hz, 1H), 4.41 – 4.32 (m, 1H), 4.03 – 3.96 (m, 1H), 2.00 (s, 3H).

$^{13}\text{C}$  NMR (101 MHz,  $(\text{CD}_3)_2\text{SO}$ )  $\delta$  192.0, 156.4, 147.1, 144.2, 143.5, 142.3, 142.1, 140.6, 139.5, 134.1, 133.7, 132.2, 130.7, 130.3, 130.1, 129.2, 128.2, 128.0, 127.9, 127.8, 127.1, 126.1, 112.4, 102.7, 97.5, 44.7, 16.9.

**HRMS:** (ESI)  $m/z$ :  $[\text{M}+\text{H}]^+$  Calcd for  $\text{C}_{35}\text{H}_{30}\text{NO}_2^+$  496.2271; Found 496.2265.

**Optical**  $[\alpha]_{\text{D}}^{25} = -2.61$  ( $c = 0.14$ ,  $\text{CH}_2\text{Cl}_2$ , 92% ee).

**HPLC** (IA,  $i\text{PrOH}/n\text{-hexane} = 20/80$ , flow rate = 0.5 mL/min, 254 nm)  $t_{\text{R}} = 17.6$  min (major), 18.6 min (minor).

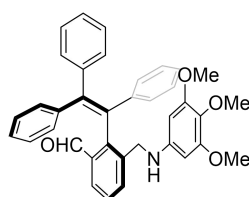

**(S)-3-(((3,4,5-trimethoxyphenyl)amino)methyl)-2-(1,2,2-triphenylvinyl)benzaldehyde (3r)** was synthesized by following Procedure B. The crude material was purified by column chromatography ( $\text{SiO}_2$ , petroleum ether: EtOAc = 5:1) to provide **3r** as a yellow solid (38.9 mg, 70% yield).

$^1\text{H}$  NMR (600 MHz,  $(\text{CD}_3)_2\text{SO}$ )  $\delta$  10.34 (s, 1H), 7.60 – 7.52 (m, 2H), 7.38 (t,  $J = 7.7$  Hz, 1H), 7.26 – 7.17 (m, 3H), 7.14 – 7.10 (m, 5H), 7.08 – 7.04 (m, 3H), 7.05 – 6.97 (m, 2H), 6.93 – 6.85 (m, 2H), 6.04 (t,  $J = 6.2$  Hz, 1H), 5.60 (s, 2H), 4.35 – 4.22 (m, 1H), 4.10 – 4.01 (m, 1H), 3.55 (s, 6H), 3.49 (s, 3H).

$^{13}\text{C}$  NMR (151 MHz,  $(\text{CD}_3)_2\text{SO}$ )  $\delta$  192.1, 153.5, 145.2, 144.2, 143.5, 142.3, 142.1, 140.8, 139.4, 134.1, 133.6, 132.1, 130.7, 130.2, 129.2, 128.8, 128.2, 128.0, 127.90, 127.86, 127.3, 127.0, 126.3, 89.8, 60.2, 55.5, 44.6.

**HRMS:** (ESI)  $m/z$ :  $[\text{M}+\text{H}]^+$  Calcd for  $\text{C}_{37}\text{H}_{34}\text{NO}_4^+$  556.2482; Found 556.2479.

**Optical**  $[\alpha]_{\text{D}}^{25} = -6.40$  ( $c = 0.14$ ,  $\text{CH}_2\text{Cl}_2$ , 93% ee).

**HPLC** (IC,  $i\text{PrOH}/n\text{-hexane} = 20/80$ , flow rate = 0.5 mL/min, 254 nm)  $t_{\text{R}} = 30.3$  min (major), 23.3 min (minor).

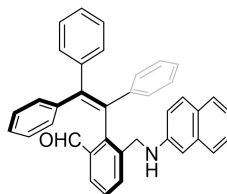

**(S)-3-((naphthalen-2-ylamino)methyl)-2-(1,2,2-triphenylvinyl)benzaldehyde (3s)** was synthesized by following Procedure B. The crude material was purified by column chromatography (SiO<sub>2</sub>, petroleum ether: EtOAc = 10:1) to provide **3s** as a yellow solid (50.1 mg, 97% yield).

**<sup>1</sup>H NMR** (400 MHz, (CD<sub>3</sub>)<sub>2</sub>SO) δ 10.39 (s, 1H), 7.65 – 7.51 (m, 4H), 7.32 (t, *J* = 7.7 Hz, 1H), 7.28 – 7.25 (m, 2H), 7.24 – 7.19 (m, 4H), 7.18 – 7.12 (m, 7H), 7.10 – 7.04 (m, 3H), 7.01 – 6.95 (m, 2H), 6.93 – 6.81 (m, 1H), 6.60 (t, *J* = 6.2 Hz, 1H), 5.98 (d, *J* = 2.4 Hz, 1H), 4.52 – 4.40 (m, 1H), 4.34 – 4.24 (m, 1H).

**<sup>13</sup>C NMR** (101 MHz, (CD<sub>3</sub>)<sub>2</sub>SO) δ 192.1, 146.1, 144.2, 143.7, 142.4, 142.1, 140.8, 138.8, 134.8, 134.2, 133.6, 131.8, 130.7, 130.3, 129.2, 128.5, 128.2, 128.1, 127.9, 127.4, 127.4, 127.3, 127.1, 126.5, 126.4, 126.0, 125.2, 121.2, 118.0, 102.3, 79.2, 44.1.

**HRMS:** (ESI) *m/z*: [M+H]<sup>+</sup> Calcd for C<sub>38</sub>H<sub>30</sub>NO<sup>+</sup> 516.2322; Found 516.2318.

**Optical** [α]<sub>D</sub><sup>25</sup> = -2.05 (c = 0.13, CH<sub>2</sub>Cl<sub>2</sub>, 89% ee).

**HPLC** (IA, <sup>*i*</sup>PrOH/n-hexane = 20/80, flow rate = 0.5 mL/min, 254 nm) *t*<sub>R</sub> = 16.4 min (major), 14.9 min (minor).

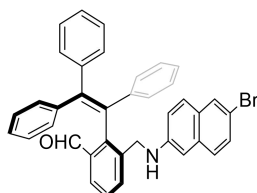

**(S)-3-(((6-bromonaphthalen-2-yl)amino)methyl)-2-(1,2,2-triphenylvinyl)benzaldehyde (3t)** was synthesized by following Procedure B. The crude material was purified by column chromatography (SiO<sub>2</sub>, petroleum ether: EtOAc = 10:1) to provide **3t** as a yellow solid (54.7 mg, 92% yield).

**<sup>1</sup>H NMR** (600 MHz, (CD<sub>3</sub>)<sub>2</sub>SO) δ 10.38 (s, 1H), 7.85 (d, *J* = 2.1 Hz, 1H), 7.59 (dd, *J* = 7.7, 1.3 Hz, 1H), 7.56 (d, *J* = 8.9 Hz, 1H), 7.54 – 7.51 (m, 1H), 7.36 – 7.33 (m, 2H), 7.25 – 7.17 (m, 7H), 7.17 – 7.12 (m, 6H), 7.07 – 7.04 (m, 2H), 6.98 – 6.95 (m, 2H), 6.92 (dd, *J* = 8.9, 2.3 Hz, 1H), 6.74 (t, *J* = 6.1 Hz, 1H), 4.47 – 4.40 (m, 1H), 4.31 – 4.25 (m, 1H).

<sup>13</sup>C NMR (151 MHz, (CD<sub>3</sub>)<sub>2</sub>SO) δ 192.1, 146.6, 144.2, 143.7, 142.4, 142.0, 140.8, 138.5, 134.3, 133.5, 133.4, 131.8, 130.7, 130.3, 129.2, 129.2, 128.8, 128.2, 128.1, 128.0, 127.8, 127.6, 127.3, 127.3, 127.1, 126.5, 119.0, 113.4, 102.0, 43.9.

**HRMS:** (ESI) m/z: [M+H]<sup>+</sup> Calcd for C<sub>38</sub>H<sub>29</sub>BrNO<sup>+</sup> 594.1427; Found 594.1420.

**Optical** [α]<sub>D</sub><sup>25</sup> = -6.78 (c = 0.18, CH<sub>2</sub>Cl<sub>2</sub>, 92% ee).

**HPLC** (OD-H, <sup>i</sup>PrOH/n-hexane = 20/80, flow rate = 0.5 mL/min, 254 nm) t<sub>R</sub> = 13.3 min (major), 14.8 min (minor).

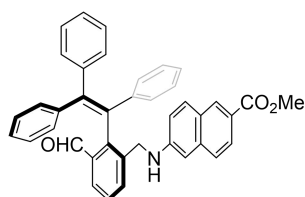

**(S)-methyl 6-((3-formyl-2-(1,2,2-triphenylvinyl)benzyl)amino)-2-naphthoate (3u)** was synthesized by following Procedure B. The crude material was purified by column chromatography (SiO<sub>2</sub>, petroleum ether: EtOAc = 5:1) to provide **3u** as a yellow solid (47.7 mg, 83% yield).

<sup>1</sup>H NMR (400 MHz, (CD<sub>3</sub>)<sub>2</sub>SO) δ 10.39 (s, 1H), 8.32 (d, *J* = 1.8 Hz, 1H), 7.78 – 7.72 (m, 2H), 7.60 (dd, *J* = 7.7, 1.4 Hz, 1H), 7.52 (dd, *J* = 7.7, 1.4 Hz, 1H), 7.36 – 7.27 (m, 2H), 7.24 – 7.19 (m, 4H), 7.19 – 7.11 (m, 7H), 7.09 – 7.04 (m, 2H), 7.04 – 7.00 (m, 1H), 7.00 – 6.94 (m, 3H), 5.97 (d, *J* = 2.4 Hz, 1H), 4.55 – 4.43 (m, 1H), 4.40 – 4.28 (m, 1H), 3.83 (s, 1H).

<sup>13</sup>C NMR (101 MHz, (CD<sub>3</sub>)<sub>2</sub>SO) δ 192.1, 166.6, 148.4, 144.3, 143.8, 142.4, 142.0, 140.8, 138.3, 137.5, 134.3, 133.5, 131.8, 130.7, 130.4, 130.3, 129.2, 128.2, 128.1, 128.04, 127.96, 127.4, 127.3, 127.2, 126.6, 125.3, 125.2, 121.8, 118.8, 101.8, 79.2, 51.8, 43.8.

**HRMS:** (ESI) m/z: [M+H]<sup>+</sup> Calcd for C<sub>40</sub>H<sub>32</sub>NO<sub>3</sub><sup>+</sup> 574.2377; Found 574.2371.

**Optical** [α]<sub>D</sub><sup>25</sup> = -8.55 (c = 0.18, CH<sub>2</sub>Cl<sub>2</sub>, 87% ee).

**HPLC** (IA, <sup>i</sup>PrOH/n-hexane = 20/80, flow rate = 0.5 mL/min, 254 nm) t<sub>R</sub> = 18.7 min (major), 20.3 min (minor).

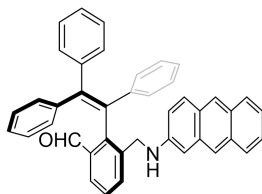

**(S)-3-((anthracen-2-ylamino)methyl)-2-(1,2,2-triphenylvinyl)benzaldehyde (3v)** was synthesized by following Procedure B. The crude material was purified by column chromatography (SiO<sub>2</sub>, petroleum ether: DCM: EtOAc = 4:2:0.1) to provide **3v** as a yellow solid (36.2 mg, 64% yield).

<sup>1</sup>H NMR (400 MHz, (CD<sub>3</sub>)<sub>2</sub>SO) δ 10.41 (s, 1H), 8.25 (s, 1H), 7.91 – 7.85 (m, 2H), 7.81 – 7.74 (m, 2H), 7.64 – 7.55 (m, 2H), 7.41 – 7.33 (m, 2H), 7.33 – 7.26 (m, 2H), 7.24 – 7.21 (m, 5H), 7.20 – 7.16 (m, 5H), 7.13 – 7.09 (m, 2H), 7.07 (dd, *J* = 9.1, 2.2 Hz, 1H), 7.03 – 6.99 (m, 2H), 6.77 (t, *J* = 5.9 Hz, 1H), 5.94 (d, *J* = 2.2 Hz, 1H), 4.59 – 4.44 (m, 1H), 4.40 – 4.32 (m, 1H).

<sup>13</sup>C NMR (101 MHz, (CD<sub>3</sub>)<sub>2</sub>SO) δ 192.1, 145.4, 144.2, 143.8, 142.4, 142.1, 140.8, 138.5, 134.3, 133.6, 133.3, 131.9, 131.9, 130.7, 130.4, 129.2, 128.9, 128.6, 128.2, 128.1, 128.0, 127.4, 127.3, 127.2, 127.1, 126.7, 126.5, 125.8, 125.3, 123.3, 121.4, 120.6, 99.3, 79.2, 44.1.

**HRMS:** (ESI) *m/z*: [M+H]<sup>+</sup> Calcd for C<sub>42</sub>H<sub>32</sub>NO<sup>+</sup> 566.2478; Found 566.2472.

**Optical** [α]<sub>D</sub><sup>25</sup> = -3.68 (c = 0.14, CH<sub>2</sub>Cl<sub>2</sub>, 90% ee).

**HPLC** (OD-H, <sup>i</sup>PrOH/n-hexane = 20/80, flow rate = 0.5 mL/min, 254 nm) *t*<sub>R</sub> = 24.0 min (major), 26.3 min (minor).

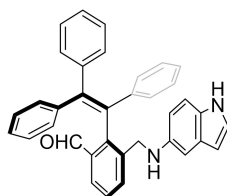

**(S)-3-(((1H-indol-5-yl)amino)methyl)-2-(1,2,2-triphenylvinyl)benzaldehyde (3w)** was synthesized by following Procedure B for 72 h. The crude material was purified by column chromatography (SiO<sub>2</sub>, petroleum ether: DCM: EtOAc = 2:2:0.1) to provide **3w** as a yellow solid (37.8 mg, 70% yield).

<sup>1</sup>H NMR (600 MHz, (CD<sub>3</sub>)<sub>2</sub>SO) δ 10.60 (s, 1H), 10.36 (s, 1H), 8.52 (s, 1H), 7.61 (d, *J* = 7.7 Hz, 1H), 7.57 – 7.54 (m, 1H), 7.32 (t, *J* = 7.7 Hz, 1H), 7.25 – 7.20 (m, 3H), 7.18 – 7.09 (m, 12H), 7.05 (d, *J* = 8.6 Hz, 1H), 7.02 (d, *J* = 7.2 Hz, 2H), 6.97 – 6.92 (m,

2H), 6.40 – 6.37 (m, 1H), 6.04 – 5.92 (m, 2H), 4.32 (d,  $J = 7.1$  Hz, 2H), 4.19 – 4.12 (m, 1H).

$^{13}\text{C}$  NMR (151 MHz,  $(\text{CD}_3)_2\text{SO}$ )  $\delta$  192.2, 165.2, 161.3, 143.7, 142.4, 142.1, 140.8, 140.0, 134.1, 133.7, 132.4, 130.7, 130.3, 129.2, 128.3, 128.2, 128.0, 127.9, 127.8, 127.34, 127.27, 127.1, 122.8, 111.7, 100.0, 61.3.

**HRMS:** (ESI)  $m/z$ :  $[\text{M}+\text{H}]^+$  Calcd for  $\text{C}_{36}\text{H}_{29}\text{N}_2\text{O}^+$  505.2274; Found 505.2267.

**Optical**  $[\alpha]_{\text{D}}^{25} = 0.01$  ( $c = 0.01$ ,  $\text{CH}_2\text{Cl}_2$ , 83% ee).

**HPLC** (IC,  $i\text{PrOH}/n\text{-hexane} = 20/80$ , flow rate = 1.0 mL/min, 254 nm)  $t_{\text{R}} = 13.0$  min (major), 11.8 min (minor).

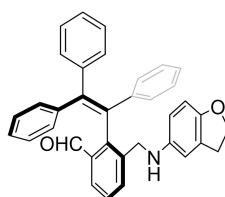

**(S)-3-(((2,3-dihydrobenzofuran-5-yl)amino)methyl)-2-(1,2,2-triphenylvinyl)benzaldehyde (3x)** was synthesized by following Procedure B. The crude material was purified by column chromatography ( $\text{SiO}_2$ , petroleum ether: EtOAc = 10:1) to provide **3x** as a yellow solid (20.8 mg, 41% yield).

$^1\text{H}$  NMR (600 MHz,  $(\text{CD}_3)_2\text{SO}$ )  $\delta$  10.35 (s, 1H), 7.58 – 7.53 (m, 2H), 7.34 (t,  $J = 7.7$  Hz, 1H), 7.24 – 7.20 (m, 3H), 7.16 – 7.12 (m, 5H), 7.11 – 7.08 (m, 3H), 7.00 – 6.97 (m, 2H), 6.93 – 6.90 (m, 2H), 6.37 (d,  $J = 8.4$  Hz, 1H), 5.95 (d,  $J = 2.4$  Hz, 1H), 5.91 – 5.88 (m, 1H), 5.77 (q,  $J = 5.1, 4.1$  Hz, 1H), 4.31 (t,  $J = 8.6$  Hz, 2H), 4.29 – 4.23 (m, 1H), 4.14 – 4.07 (m, 1H), 2.98 – 2.85 (m, 2H).

$^{13}\text{C}$  NMR (151 MHz,  $(\text{CD}_3)_2\text{SO}$ )  $\delta$  192.2, 151.1, 144.0, 143.6, 142.5, 142.4, 142.1, 140.8, 139.8, 134.1, 133.7, 132.2, 130.7, 130.3, 129.2, 128.2, 128.0, 127.9, 127.4, 127.32, 127.28, 127.0, 126.3, 111.3, 109.1, 108.8, 70.1, 45.0, 29.8.

**HRMS:** (ESI)  $m/z$ :  $[\text{M}+\text{H}]^+$  Calcd for  $\text{C}_{36}\text{H}_{30}\text{NO}_2^+$  508.2271; Found 508.2269.

**Optical**  $[\alpha]_{\text{D}}^{25} = -3.56$  ( $c = 0.15$ ,  $\text{CH}_2\text{Cl}_2$ , 85% ee).

**HPLC** (IA,  $i\text{PrOH}/n\text{-hexane} = 20/80$ , flow rate = 0.5 mL/min, 254 nm)  $t_{\text{R}} = 20.3$  min (major), 18.9 min (minor).

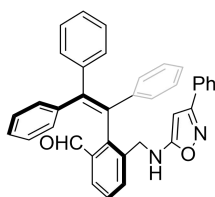

**(S)-3-(((3-phenylisoxazol-5-yl)amino)methyl)-2-(1,2,2-triphenylvinyl)benzaldehyde (3y)** was synthesized by following Procedure B. The crude material was purified by column chromatography (SiO<sub>2</sub>, petroleum ether: DCM: EtOAc = 1:1:0.1) to provide **3y** as a yellow solid (20.8 mg, 39% yield).

**<sup>1</sup>H NMR** (600 MHz, (CD<sub>3</sub>)<sub>2</sub>SO) δ 10.35 (s, 1H), 7.98 – 7.93 (m, 1H), 7.63 – 7.57 (m, 4H), 7.47 – 7.40 (m, 4H), 7.25 – 7.19 (m, 4H), 7.18 – 7.13 (m, 6H), 7.11 – 7.09 (m, 3H), 7.04 – 7.01 (m, 2H), 6.95 – 6.91 (m, 2H), 4.49 – 4.40 (m, 1H), 4.26 – 4.17 (m, 1H).

**<sup>13</sup>C NMR** (151 MHz, (CD<sub>3</sub>)<sub>2</sub>SO) δ 192.0, 170.5, 162.3, 144.5, 143.5, 142.3, 141.9, 140.7, 138.1, 134.1, 133.2, 131.7, 130.6, 130.3, 129.7, 129.5, 129.2, 128.8, 128.14, 128.07, 127.9, 127.3, 127.1, 126.8, 126.2, 74.0, 44.5.

**HRMS:** (ESI) m/z: [M+H]<sup>+</sup> Calcd for C<sub>37</sub>H<sub>29</sub>N<sub>2</sub>O<sub>2</sub><sup>+</sup> 533.2224; Found 533.2219.

**Optical** [α]<sub>D</sub><sup>25</sup> = -0.52 (c = 0.17, CH<sub>2</sub>Cl<sub>2</sub>, 88% ee).

**HPLC** (OD-H, <sup>i</sup>PrOH/n-hexane = 20/80, flow rate = 0.5 mL/min, 254 nm) t<sub>R</sub> = 33.8 min (major), 25.2 min (minor).

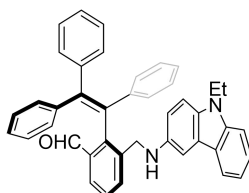

**(S)-3-(((9-ethyl-9H-carbazol-3-yl)amino)methyl)-2-(1,2,2-triphenylvinyl)benzaldehyde (3z)** was synthesized by following Procedure B. The crude material was purified by column chromatography (SiO<sub>2</sub>, petroleum ether: EtOAc = 10:1) to provide **3z** as a yellow solid (49 mg, 84% yield).

**<sup>1</sup>H NMR** (400 MHz, (CD<sub>3</sub>)<sub>2</sub>SO) δ 10.38 (s, 1H), 7.77 (d, *J* = 7.8 Hz, 1H), 7.66 (d, *J* = 7.8 Hz, 1H), 7.58 (d, *J* = 7.5 Hz, 1H), 7.44 (d, *J* = 8.2 Hz, 1H), 7.33 (dd, *J* = 8.7, 6.7 Hz, 2H), 7.28 (d, *J* = 8.7 Hz, 1H), 7.24 – 7.14 (m, 9H), 7.14 – 7.10 (m, 3H), 7.10 – 7.05 (m, 3H), 7.01 – 6.94 (m, 2H), 6.80 (t, *J* = 2.4 Hz, 1H), 6.66 – 6.62 (m, 1H), 4.56 – 4.41 (m, 1H), 4.32 – 4.18 (m, 3H), 1.23 (t, *J* = 7.0 Hz, 3H).

<sup>13</sup>C NMR (101 MHz, (CD<sub>3</sub>)<sub>2</sub>SO) δ 192.1, 144.1, 143.7, 142.4, 142.1, 141.9, 140.9, 139.8, 139.7, 134.2, 133.7, 132.8, 132.3, 130.7, 130.3, 129.3, 128.2, 128.0, 127.9, 127.9, 127.3, 127.3, 127.1, 126.3, 125.1, 122.6, 121.7, 119.8, 117.6, 114.1, 109.7, 108.8, 101.3, 79.2, 45.3, 36.8, 13.7.

**HRMS:** (ESI) m/z: [M+H]<sup>+</sup> Calcd for C<sub>42</sub>H<sub>35</sub>N<sub>2</sub>O<sup>+</sup> 583.2744; Found 583.2737.

**Optical** [α]<sub>D</sub><sup>25</sup> = -4.12 (c = 0.17, CH<sub>2</sub>Cl<sub>2</sub>, 90% ee).

**HPLC** (OD-H, <sup>i</sup>PrOH/n-hexane = 20/80, flow rate = 0.5 mL/min, 254 nm) t<sub>R</sub> = 38.0 min (major), 33.2 min (minor).

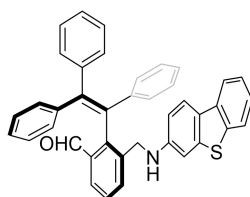

**(S)-3-(((dibenzo[b,d]thiophen-3-ylamino)methyl)-2-(1,2,2-triphenylvinyl)benzaldehyde (3aa)** was synthesized by following Procedure B. The crude material was purified by column chromatography (SiO<sub>2</sub>, Toluene) to provide **3aa** as a yellow solid (36.0 mg, 63% yield).

<sup>1</sup>H NMR (600 MHz, (CD<sub>3</sub>)<sub>2</sub>SO) δ 10.39 (s, 1H), 8.05 – 7.99 (m, 1H), 7.91 (d, *J* = 8.6 Hz, 1H), 7.81 (d, *J* = 7.9 Hz, 1H), 7.60 (dd, *J* = 7.7, 1.4 Hz, 1H), 7.55 (dd, *J* = 7.7, 1.3 Hz, 1H), 7.36 – 7.31 (m, 2H), 7.30 – 7.26 (m, 1H), 7.23 – 7.18 (m, 6H), 7.18 – 7.14 (m, 5H), 7.06 – 7.03 (m, 2H), 6.99 – 6.97 (m, 2H), 6.77 (s, 1H), 6.60 (dd, *J* = 8.6, 2.1 Hz, 1H), 6.10 (d, *J* = 2.1 Hz, 1H), 4.50 – 4.43 (m, 1H), 4.33 – 4.23 (m, 1H).

<sup>13</sup>C NMR (151 MHz, (CD<sub>3</sub>)<sub>2</sub>SO) δ 192.1, 148.0, 144.2, 143.8, 142.4, 142.0, 140.7, 140.5, 138.8, 136.6, 135.7, 134.3, 133.5, 131.8, 130.7, 130.4, 129.2, 128.2, 128.1, 128.02, 127.96, 127.5, 127.29, 127.25, 126.6, 124.7, 124.6, 124.5, 122.6, 122.4, 120.0, 112.4, 102.3, 44.0.

**HRMS:** (ESI) m/z: [M+H]<sup>+</sup> Calcd for C<sub>40</sub>H<sub>30</sub>NOS<sup>+</sup> 572.2043; Found 572.2036.

**Optical** [α]<sub>D</sub><sup>25</sup> = -4.85 (c = 0.15, CH<sub>2</sub>Cl<sub>2</sub>, 91% ee).

**HPLC** (IA, <sup>i</sup>PrOH/n-hexane = 20/80, flow rate = 0.5 mL/min, 254 nm) t<sub>R</sub> = 17.4 min (major), 16.0 min (minor).

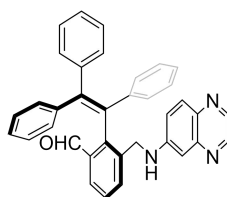

**(S)-3-((quinoxalin-6-ylamino)methyl)-2-(1,2,2-triphenylvinyl)benzaldehyde (3ab)** was synthesized by following Procedure B at -10 °C for 72 h. The crude material was purified by column chromatography (SiO<sub>2</sub>, petroleum ether: EtOAc = 2:1) to provide **3ab** as a yellow solid (25.9 mg, 50% yield).

<sup>1</sup>H NMR (600 MHz, (CD<sub>3</sub>)<sub>2</sub>SO) δ 10.38 (s, 1H), 8.61 (d, *J* = 2.0 Hz, 1H), 8.46 (d, *J* = 2.0 Hz, 1H), 7.73 (d, *J* = 9.1 Hz, 1H), 7.59 (dd, *J* = 7.7, 1.4 Hz, 1H), 7.52 (dd, *J* = 7.7, 1.3 Hz, 1H), 7.35 (t, *J* = 7.7 Hz, 1H), 7.22 – 7.19 (m, 5H), 7.17 – 7.12 (m, 8H), 7.06 – 7.04 (m, 2H), 6.99 – 6.97 (m, 2H), 6.37 (d, *J* = 2.5 Hz, 1H), 4.58 – 4.43 (m, 1H), 4.21 – 4.13 (m, 1H).

<sup>13</sup>C NMR (151 MHz, (CD<sub>3</sub>)<sub>2</sub>SO) δ 192.0, 149.6, 145.2, 145.0, 144.5, 143.9, 142.4, 142.0, 140.7, 140.1, 137.9, 136.9, 134.4, 133.5, 131.9, 130.7, 130.3, 129.6, 129.2, 128.2, 128.1, 128.0, 127.4, 127.3, 127.2, 126.6, 122.2, 102.3, 44.2.

**HRMS:** (ESI) *m/z*: [M+H]<sup>+</sup> Calcd for C<sub>36</sub>H<sub>28</sub>N<sub>3</sub>O<sup>+</sup> 518.2227; Found 518.2222.

**Optical** [ $\alpha$ ]<sub>D</sub><sup>25</sup> = -2.95 (*c* = 0.16, CH<sub>2</sub>Cl<sub>2</sub>, 82% ee).

**HPLC** (IA, *i*PrOH/*n*-hexane = 10/90, flow rate = 1.0 mL/min, 254 nm) *t*<sub>R</sub> = 25.0 min (major), 27.7 min (minor).

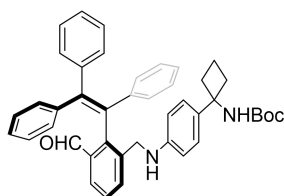

**(S)-tert-butyl(1-(4-((3-formyl-2-(1,2,2-triphenylvinyl)benzyl)amino)phenyl)cyclobutyl)carbamate (3ac)** was synthesized by following Procedure B. The crude material was purified by column chromatography (SiO<sub>2</sub>, petroleum ether: EtOAc = 5:1) to provide **3ac** as a yellow solid (47.6 mg, 75% yield).

<sup>1</sup>H NMR (600 MHz, (CD<sub>3</sub>)<sub>2</sub>SO) δ 10.36 (s, 1H), 7.57 (dd, *J* = 7.7, 1.4 Hz, 1H), 7.54 (d, *J* = 7.3 Hz, 1H), 7.34 – 7.30 (m, 1H), 7.24 – 7.20 (m, 3H), 7.15 – 7.12 (m, 5H), 7.10 (s, 3H), 7.02 – 6.99 (m, 2H), 6.96 – 6.92 (m, 4H), 6.15 – 6.10 (m, 1H), 6.09 –

6.05 (m, 2H), 4.37 – 4.26 (m, 1H), 4.15 – 4.08 (m, 1H), 2.35 – 2.19 (m, 4H), 1.88 (s, 1H), 1.72 – 1.61 (m, 1H), 1.36 – 1.20 (m, 9H).

<sup>13</sup>C NMR (151 MHz, (CD<sub>3</sub>)<sub>2</sub>SO) δ 192.6, 146.9, 144.6, 144.1, 142.9, 142.6, 141.2, 140.0, 134.7, 134.2, 132.6, 131.2, 130.8, 129.7, 128.7, 128.5, 128.4, 127.8 (d, J = 4.6 Hz), 127.5, 126.8, 126.4, 111.9, 77.8, 58.4, 44.9, 34.4, 28.8, 14.6.

**HRMS:** (ESI) m/z: [M+H]<sup>+</sup> Calcd for C<sub>43</sub>H<sub>43</sub>N<sub>2</sub>O<sub>3</sub><sup>+</sup> 635.3268; Found 635.3261.

**Optical** [α]<sub>D</sub><sup>25</sup> = -5.06 (c = 0.17, CH<sub>2</sub>Cl<sub>2</sub>, 91% ee).

**HPLC** (IA, <sup>i</sup>PrOH/n-hexane = 10/90, flow rate = 0.5 mL/min, 254 nm) t<sub>R</sub> = 35.4 min (major), 37.6 min (minor).

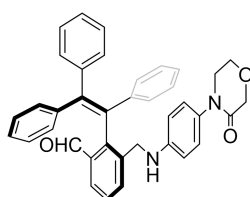

**(S)-3-(((4-(3-oxomorpholino)phenyl)amino)methyl)-2-(1,2,2-triphenylvinyl)benzaldehyde (3ad)** was synthesized by following Procedure B. The crude material was purified by column chromatography (SiO<sub>2</sub>, petroleum ether: EtOAc = 1:1) to provide **3ad** as a yellow solid (40.7 mg, 72% yield).

<sup>1</sup>H NMR (400 MHz, (CD<sub>3</sub>)<sub>2</sub>SO) δ 10.37 (s, 1H), 7.62 – 7.57 (m, 1H), 7.56 – 7.50 (m, 1H), 7.39 – 7.32 (m, 1H), 7.25 – 7.20 (m, 3H), 7.16 – 7.09 (m, 8H), 7.03 – 6.99 (m, 2H), 6.97 – 6.92 (m, 2H), 6.91 – 6.86 (m, 2H), 6.38 (t, J = 6.1 Hz, 1H), 6.13 – 6.02 (m, 2H), 4.39 – 4.31 (m, 1H), 4.20 – 4.09 (m, 3H), 3.92 – 3.86 (m, 2H), 3.60 – 3.50 (m, 2H).

<sup>13</sup>C NMR (101 MHz, (CD<sub>3</sub>)<sub>2</sub>SO) δ 192.1, 165.8, 146.8, 144.1, 143.6, 142.3, 142.0, 140.7, 139.1, 134.2, 133.6, 131.9, 130.7, 130.5, 130.3, 129.2, 128.2, 128.0, 127.9, 127.3, 127.1, 126.5, 126.4, 111.8, 67.7, 63.5, 49.6, 44.2.

**HRMS:** (ESI) m/z: [M+H]<sup>+</sup> Calcd for C<sub>38</sub>H<sub>33</sub>N<sub>2</sub>O<sub>3</sub><sup>+</sup> 565.2486; Found 565.2479.

**Optical** [α]<sub>D</sub><sup>25</sup> = -3.29 (c = 0.15, CH<sub>2</sub>Cl<sub>2</sub>, 86% ee).

**HPLC** (AD-H, <sup>i</sup>PrOH/n-hexane = 20/80, flow rate = 0.5 mL/min, 254 nm) t<sub>R</sub> = 30.9 min (major), 34.5 min (minor).

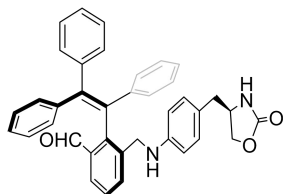

**(S)-((R)-3-(((4-((2-oxooxazolidin-4-yl)methyl)phenyl)amino)methyl)-2-(1,2,2-triphenylvinyl)benzaldehyde (3ae)** was synthesized by following Procedure B. The crude material was purified by column chromatography (SiO<sub>2</sub>, petroleum ether: EtOAc = 1:1) to provide **3ae** as a yellow solid (37.9 mg, 67% yield).

<sup>1</sup>H NMR (600 MHz, (CD<sub>3</sub>)<sub>2</sub>SO) δ 10.37 (s, 1H), 7.74 (s, 1H), 7.58 (dd, *J* = 7.6, 1.4 Hz, 1H), 7.54 – 7.51 (m, 1H), 7.33 (t, *J* = 7.7 Hz, 1H), 7.23 – 7.19 (m, 3H), 7.15 – 7.12 (m, 5H), 7.12 – 7.09 (m, 3H), 7.02 – 6.99 (m, 2H), 6.93 (dd, *J* = 6.6, 3.0 Hz, 2H), 6.81 (d, *J* = 8.3 Hz, 2H), 6.16 (t, *J* = 6.1 Hz, 1H), 6.08 (dd, *J* = 8.9, 2.7 Hz, 2H), 4.36 – 4.28 (m, 1H), 4.21 – 4.16 (m, 1H), 4.15 – 4.10 (m, 1H), 3.93 – 3.87 (m, 2H), 2.66 – 2.59 (m, 1H), 2.50 (q, *J* = 1.9 Hz, 1H).

<sup>13</sup>C NMR (151 MHz, (CD<sub>3</sub>)<sub>2</sub>SO) δ 192.1, 158.7, 147.0, 144.0, 143.6, 142.4, 142.1, 140.7, 139.3, 134.2, 133.6, 132.1, 130.7, 130.3, 129.9, 129.2, 128.2, 128.03, 127.95, 127.3, 127.1, 126.4, 123.6, 112.1, 68.1, 59.8, 52.8, 44.3.

**HRMS:** (ESI) *m/z*: [M+H]<sup>+</sup> Calcd for C<sub>38</sub>H<sub>33</sub>N<sub>2</sub>O<sub>3</sub><sup>+</sup> 565.2486; Found 565.2482.

**Optical** [α]<sub>D</sub><sup>25</sup> = -2.83 (c = 0.15, CH<sub>2</sub>Cl<sub>2</sub>, > 20/1 dr)

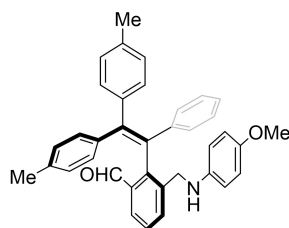

**(S)-3-(((4-methoxyphenyl)amino)methyl)-2-(1-phenyl-2,2-di-p-tolylvinyl)benzaldehyde (4a)** was synthesized by following Procedure B. The crude material was purified by column chromatography (SiO<sub>2</sub>, petroleum ether: EtOAc = 10:1) to provide **4a** as a yellow solid (34.1 mg, 65% yield).

<sup>1</sup>H NMR (600 MHz, (CD<sub>3</sub>)<sub>2</sub>SO) δ 10.34 (s, 1H), 7.57 (dd, *J* = 7.7, 1.4 Hz, 1H), 7.53 (dd, *J* = 7.8, 1.4 Hz, 1H), 7.33 (t, *J* = 7.7 Hz, 1H), 7.19 – 7.08 (m, 3H), 7.02 (d, *J* = 7.5 Hz, 2H), 7.01 – 6.94 (m, 4H), 6.91 (d, *J* = 7.9 Hz, 2H), 6.82 – 6.74 (m, 2H), 6.59

– 6.52 (m, 2H), 6.09 – 6.01 (m, 2H), 5.81 (t,  $J = 6.1$  Hz, 1H), 4.29 – 4.19 (m, 1H), 4.12 – 4.03 (m, 1H), 3.58 (s, 3H), 2.25 (s, 3H), 2.18 (s, 3H).

$^{13}\text{C}$  NMR (151 MHz,  $(\text{CD}_3)_2\text{SO}$ )  $\delta$  192.2, 150.7, 144.1, 144.0, 142.4, 141.2, 139.7, 139.5, 139.3, 136.5, 136.4, 134.1, 132.6, 132.2, 130.7, 130.2, 129.3, 128.7, 128.5, 128.0, 127.7, 126.8, 126.1, 114.5, 113.0, 55.2, 44.8, 20.8, 20.7.

**HRMS:** (ESI)  $m/z$ :  $[\text{M}+\text{H}]^+$  Calcd for  $\text{C}_{37}\text{H}_{34}\text{NO}_2^+$  524.2584; Found 524.2578.

**Optical**  $[\alpha]_{\text{D}}^{25} = -4.19$  ( $c = 0.14$ ,  $\text{CH}_2\text{Cl}_2$ , 87% ee).

**HPLC** (IA,  $i\text{PrOH}/n\text{-hexane} = 20/80$ , flow rate = 0.5 mL/min, 254 nm)  $t_{\text{R}} = 17.4$  min (major), 16.5 min (minor).

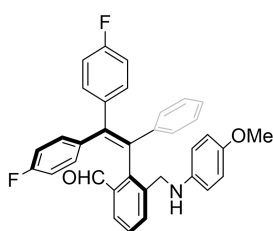

**(S)-2-(2,2-bis(4-fluorophenyl)-1-phenylvinyl)-3-(((4-methoxyphenyl)amino)methyl)benzaldehyde (4b)** was synthesized by following Procedure B. The crude material was purified by column chromatography ( $\text{SiO}_2$ , petroleum ether: EtOAc = 10:1) to provide **4b** as a yellow solid (27.7 mg, 52% yield).

$^1\text{H}$  NMR (600 MHz,  $(\text{CD}_3)_2\text{SO}$ )  $\delta$  10.31 (s, 1H), 7.61 – 7.58 (m, 1H), 7.57 – 7.55 (m, 1H), 7.39 – 7.35 (m, 1H), 7.19 – 7.14 (m, 5H), 7.09 – 7.05 (m, 2H), 7.00 – 6.98 (m, 2H), 6.97 – 6.94 (m, 4H), 6.58 – 6.55 (m, 2H), 6.09 – 6.06 (m, 2H), 5.81 (t,  $J = 6.1$  Hz, 1H), 4.28 – 4.19 (m, 1H), 4.11 – 4.05 (m, 1H), 3.58 (s, 3H).

$^{13}\text{C}$  NMR (151 MHz,  $(\text{CD}_3)_2\text{SO}$ )  $\delta$  192.3, 162.0, 161.9, 161.1 (dd,  $J = 245.3, 25.9$  Hz), 160.4, 160.2, 150.8, 143.1, 142.4, 141.7, 140.6, 139.5, 138.6, 138.3, 134.4, 134.2, 132.8 (d,  $J = 8.0$  Hz), 132.3, 131.4 (d,  $J = 8.0$  Hz), 130.3, 128.1, 128.0, 127.2, 126.8, 115.2 (d,  $J = 21.5$  Hz), 114.9 (d,  $J = 21.5$  Hz), 114.5, 113.0, 55.2, 44.8.

$^{19}\text{F}$  NMR (565 MHz,  $(\text{CD}_3)_2\text{SO}$ )  $\delta$  -114.0, -114.2.

**HRMS:** (ESI)  $m/z$ :  $[\text{M}+\text{H}]^+$  Calcd for  $\text{C}_{35}\text{H}_{28}\text{F}_2\text{NO}_2^+$  532.2083; Found 532.2078.

**Optical**  $[\alpha]_{\text{D}}^{25} = -0.94$  ( $c = 0.07$ ,  $\text{CH}_2\text{Cl}_2$ , 96% ee).

**HPLC** (IA,  $i\text{PrOH}/n\text{-hexane} = 20/80$ , flow rate = 0.5 mL/min, 254 nm)  $t_{\text{R}} = 16.5$  min (major), 15.1 min (minor).

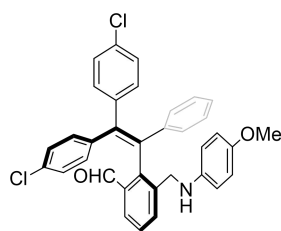

**(S)-2-(2,2-bis(4-chlorophenyl)-1-phenylvinyl)-3-(((4-methoxyphenyl)amino)methyl)benzaldehyde (4c)** was synthesized by following Procedure B. The crude material was purified by column chromatography (SiO<sub>2</sub>, petroleum ether: EtOAc = 10:1) to provide **4c** as a yellow solid (38.4 mg, 68% yield).

<sup>1</sup>H NMR (600 MHz, (CD<sub>3</sub>)<sub>2</sub>SO) δ 10.30 (s, 1H), 7.61 (dd, *J* = 7.7, 1.4 Hz, 1H), 7.56 (dd, *J* = 7.5, 1.3 Hz, 1H), 7.39 (t, *J* = 7.7 Hz, 1H), 7.32 – 7.29 (m, 2H), 7.21 – 7.13 (m, 7H), 7.01 – 6.99 (m, 2H), 6.94 – 6.91 (m, 2H), 6.59 – 6.54 (m, 2H), 6.06 – 6.01 (m, 2H), 5.83 (t, *J* = 6.1 Hz, 1H), 4.25 – 4.18 (m, 1H), 4.14 – 4.08 (m, 1H), 3.59 (s, 3H).

<sup>13</sup>C NMR (151 MHz, (CD<sub>3</sub>)<sub>2</sub>SO) δ 192.3, 150.8, 142.7, 142.3, 141.1, 140.8, 140.6, 140.3, 139.3, 135.2, 134.3, 132.6, 132.4, 132.1, 131.2, 130.3, 128.3, 128.12, 128.09, 127.3, 127.1, 114.5, 113.0, 55.2, 44.8.

**HRMS:** (ESI) *m/z*: [M+H]<sup>+</sup> Calcd for C<sub>35</sub>H<sub>28</sub>Cl<sub>2</sub>NO<sub>2</sub><sup>+</sup> 564.1492; Found 564.1487.

**Optical** [α]<sub>D</sub><sup>25</sup> = -3.14 (*c* = 0.12, CH<sub>2</sub>Cl<sub>2</sub>, 81% ee).

**HPLC** (IA, <sup>i</sup>PrOH/n-hexane = 20/80, flow rate = 0.5 mL/min, 254 nm) *t*<sub>R</sub> = 18.7 min (major), 20.2 min (minor).

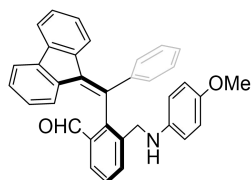

**(S)-2-((9H-fluoren-9-ylidene)(phenyl)methyl)-3-(((4-methoxyphenyl)amino)methyl)benzaldehyde (4d)** was synthesized by following Procedure B. The crude material was purified by column chromatography (SiO<sub>2</sub>, petroleum ether: EtOAc = 10:1) to provide **4d** as a yellow solid (31.1 mg, 63% yield).

<sup>1</sup>H NMR (600 MHz, (CD<sub>3</sub>)<sub>2</sub>SO) δ 10.16 (s, 1H), 7.92 – 7.86 (m, 2H), 7.82 – 7.77 (m, 1H), 7.69 – 7.64 (m, 1H), 7.53 – 7.49 (m, 3H), 7.36 – 7.30 (m, 1H), 7.07 – 6.94 (m, 3H), 6.51 – 6.44 (m, 2H), 6.14 – 6.06 (m, 2H), 6.04 – 5.97 (m, 1H), 5.86 (t, *J* = 7.2 Hz, 1H), 4.12 – 3.99 (m, 1H), 3.60 – 3.47 (m, 4H).

<sup>13</sup>C NMR (151 MHz, (CD<sub>3</sub>)<sub>2</sub>SO) δ 191.7, 150.8, 143.0, 142.0, 140.3, 140.2, 139.2, 139.2, 138.0, 137.4, 136.6, 136.4, 133.9, 133.1, 129.19, 129.15, 128.8, 128.7, 127.2, 126.9, 124.4, 123.5, 120.1, 120.1, 114.5, 112.9, 55.2, 44.4.

**HRMS:** (ESI) m/z: [M+H]<sup>+</sup> Calcd for C<sub>35</sub>H<sub>28</sub>NO<sub>2</sub><sup>+</sup> 494.2115; Found 494.2108.

**Optical** [α]<sub>D</sub><sup>25</sup> = -0.08 (c = 0.10, CH<sub>2</sub>Cl<sub>2</sub>, 90% ee).

**HPLC** (AD-H, <sup>i</sup>PrOH/n-hexane = 20/80, flow rate = 0.5 mL/min, 254 nm) t<sub>R</sub> = 24.0 min (major), 26.2 min (minor).

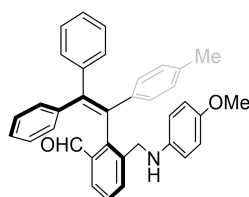

**(S)-2-(2,2-diphenyl-1-(p-tolyl)vinyl)-3-(((4-methoxyphenyl)amino)methyl)benzaldehyde (4e)** was synthesized by following Procedure B. The crude material was purified by column chromatography (SiO<sub>2</sub>, petroleum ether: EtOAc = 10:1) to provide **4e** as a yellow solid (36.2 mg, 71% yield).

<sup>1</sup>H NMR (600 MHz, (CD<sub>3</sub>)<sub>2</sub>SO) δ 10.35 (s, 1H), 7.59 – 7.47 (m, 2H), 7.36 – 7.30 (m, 1H), 7.24 – 7.20 (m, 3H), 7.15 – 7.12 (m, 2H), 7.11 – 7.08 (m, 3H), 6.97 – 6.95 (m, 2H), 6.92 – 6.90 (m, 2H), 6.88 – 6.85 (m, 2H), 6.61 – 6.53 (m, 2H), 6.11 – 6.02 (m, 2H), 5.80 (t, *J* = 6.1 Hz, 1H), 4.27 – 4.20 (m, 1H), 4.12 – 4.06 (m, 1H), 3.59 (s, 3H), 2.20 (s, 3H).

<sup>13</sup>C NMR (151 MHz, (CD<sub>3</sub>)<sub>2</sub>SO) δ 192.1, 150.8, 143.9, 143.4, 142.5, 142.4, 142.2, 139.5, 137.9, 136.3, 134.1, 133.5, 132.2, 130.6, 130.2, 129.2, 128.6, 128.2, 127.9, 127.7, 127.2, 126.1, 114.5, 113.0, 55.2, 44.8, 20.7.

**HRMS:** (ESI) m/z: [M+H]<sup>+</sup> Calcd for C<sub>36</sub>H<sub>32</sub>NO<sub>2</sub><sup>+</sup> 510.2428; Found 510.2425.

**Optical** [α]<sub>D</sub><sup>25</sup> = -5.84 (c = 0.15, CH<sub>2</sub>Cl<sub>2</sub>, 91% ee).

**HPLC** (IA, <sup>i</sup>PrOH/n-hexane = 20/80, flow rate = 0.5 mL/min, 254 nm) t<sub>R</sub> = 15.5 min (major), 13.0 min (minor).

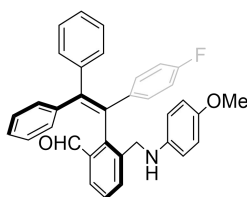

**(S)-2-(1-(4-fluorophenyl)-2,2-diphenylvinyl)-3-(((4-methoxyphenyl)amino)methyl)benzaldehyde (4f)** was synthesized by following Procedure B. The crude material was purified by column chromatography (SiO<sub>2</sub>, petroleum ether: EtOAc = 10:1) to provide **4f** as a yellow solid (45.3 mg, 88% yield).

<sup>1</sup>H NMR (600 MHz, (CD<sub>3</sub>)<sub>2</sub>SO) δ 10.32 (s, 1H), 7.58 (dd, *J* = 7.7, 1.4 Hz, 1H), 7.55 (dd, *J* = 7.7, 1.4 Hz, 1H), 7.35 (d, *J* = 7.7 Hz, 1H), 7.26 – 7.21 (m, 3H), 7.15 – 7.12 (m, 2H), 7.12 – 7.10 (m, 3H), 7.00 (dd, *J* = 7.1, 4.1 Hz, 4H), 6.93 – 6.90 (m, 2H), 6.59 – 6.56 (m, 2H), 6.11 – 6.08 (m, 2H), 5.82 (t, *J* = 6.1 Hz, 1H), 4.26 (s, 1H), 4.10 – 4.04 (m, 1H), 3.59 (s, 3H).

<sup>13</sup>C NMR (151 MHz, (CD<sub>3</sub>)<sub>2</sub>SO) δ 192.1, 160.7 (d, *J* = 245.4 Hz), 150.8, 144.0, 143.2, 142.4, 142.2, 141.9, 139.5, 137.2, 134.2, 132.7, 132.4, 130.7, 129.2, 128.2, 127.9, 127.3 (d, *J* = 4.2 Hz), 126.7, 114.9 (d, *J* = 21.5 Hz), 114.5, 113.0, 55.2, 44.9.

<sup>19</sup>F NMR (565 MHz, (CD<sub>3</sub>)<sub>2</sub>SO-d<sub>6</sub>) δ -114.4.

**HRMS:** (ESI) *m/z*: [M+H]<sup>+</sup> Calcd for C<sub>35</sub>H<sub>29</sub>FNO<sub>2</sub><sup>+</sup> 514.2177; Found 514.2173.

**Optical** [α]<sub>D</sub><sup>25</sup> = -5.47 (c = 0.18, CH<sub>2</sub>Cl<sub>2</sub>, 90% ee).

**HPLC** (IA, <sup>i</sup>PrOH/n-hexane = 20/80, flow rate = 0.5 mL/min, 254 nm) t<sub>R</sub> = 16.0 min (major), 13.8 min (minor).

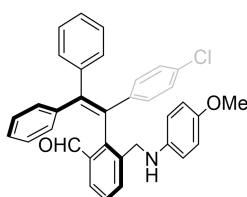

**(S)-2-(1-(4-chlorophenyl)-2,2-diphenylvinyl)-3-(((4-methoxyphenyl)amino)methyl)benzaldehyde (4g)** was synthesized by following Procedure B. The crude material was purified by column chromatography (SiO<sub>2</sub>, petroleum ether: EtOAc = 10:1) to provide **4g** as a yellow solid (32.9 mg, 62% yield).

<sup>1</sup>H NMR (600 MHz, (CD<sub>3</sub>)<sub>2</sub>SO) δ 10.37 – 10.29 (m, 1H), 7.60 – 7.52 (m, 2H), 7.37 – 7.32 (m, 1H), 7.26 – 7.21 (m, 3H), 7.15 – 7.12 (m, 2H), 7.12 – 7.09 (m, 3H), 7.00 – 6.97 (m, 2H), 6.93 – 6.90 (m, 2H), 6.59 – 6.53 (m, 2H), 6.08 (dd, *J* = 8.2, 1.5 Hz, 2H),

5.84 – 5.78 (m, 1H), 4.31 – 4.20 (m, 1H), 4.12 – 4.04 (m, 1H), 3.59 (d,  $J = 3.6$  Hz, 3H).

$^{13}\text{C}$  NMR (151 MHz,  $(\text{CD}_3)_2\text{SO}$ )  $\delta$  192.1, 150.8, 144.5, 142.9, 142.4, 142.1, 141.8, 139.7, 139.5, 134.2, 132.6, 132.3, 132.1, 131.5, 130.7, 130.3, 129.1, 128.3, 128.0, 127.9, 127.5, 127.4, 127.2, 126.9, 114.53, 114.51, 113.0, 55.2, 44.9.

**HRMS:** (ESI)  $m/z$ :  $[\text{M}+\text{H}]^+$  Calcd for  $\text{C}_{35}\text{H}_{29}\text{ClNO}_2^+$  530.1881; Found 530.1875.

**Optical**  $[\alpha]_{\text{D}}^{25} = -3.64$  ( $c = 0.14$ ,  $\text{CH}_2\text{Cl}_2$ , 90% ee).

**HPLC** (IA,  $i\text{PrOH}/n\text{-hexane} = 20/80$ , flow rate = 0.5 mL/min, 254 nm)  $t_{\text{R}} = 16.5$  min (major), 14.4 min (minor).

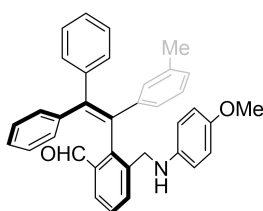

**(S)-2-(2,2-diphenyl-1-(m-tolyl)vinyl)-3-(((4-methoxyphenyl)amino)methyl)benzaldehyde (4h)** was synthesized by following Procedure B. The crude material was purified by column chromatography ( $\text{SiO}_2$ , petroleum ether: EtOAc = 10:1) to provide **4h** as a yellow solid (39.8 mg, 78% yield).

$^1\text{H}$  NMR (600 MHz,  $(\text{CD}_3)_2\text{SO}$ )  $\delta$  10.35 (s, 1H), 7.57 – 7.52 (m, 2H), 7.36 – 7.30 (m, 1H), 7.24 – 7.21 (m, 3H), 7.02 (t,  $J = 7.6$  Hz, 1H), 6.97 – 6.93 (m, 1H), 6.93 – 6.89 (m, 2H), 6.81 – 6.77 (m, 2H), 6.58 – 6.54 (m, 2H), 6.13 – 6.03 (m, 2H), 5.80 (t,  $J = 6.1$  Hz, 1H), 4.28 – 4.21 (m, 1H), 4.13 – 4.06 (m, 1H), 3.59 (s, 3H), 2.07 (d,  $J = 0.8$  Hz, 3H).

$^{13}\text{C}$  NMR (151 MHz,  $(\text{CD}_3)_2\text{SO}$ )  $\delta$  192.1, 150.8, 143.9, 143.7, 142.4, 142.2, 140.7, 139.6, 137.0, 134.1, 133.7, 132.2, 130.6, 129.2, 128.1, 127.9, 127.8, 127.7, 127.7, 127.2, 126.1, 114.5, 113.0, 55.2, 44.8.

**HRMS:** (ESI)  $m/z$ :  $[\text{M}+\text{H}]^+$  Calcd for  $\text{C}_{36}\text{H}_{32}\text{NO}_2^+$  510.2428; Found 510.2421.

**Optical**  $[\alpha]_{\text{D}}^{25} = -3.81$  ( $c = 0.15$ ,  $\text{CH}_2\text{Cl}_2$ , 91% ee).

**HPLC** (IA,  $i\text{PrOH}/n\text{-hexane} = 20/80$ , flow rate = 0.5 mL/min, 254 nm)  $t_{\text{R}} = 14.8$  min (major), 13.3 min (minor).

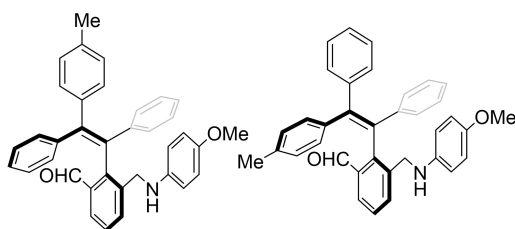

**(*S,E*)-2-(1,2-diphenyl-2-(*p*-tolyl)vinyl)-3-(((4-methoxyphenyl)amino)methyl)benzaldehyde/(*S,Z*)-2-(1,2-diphenyl-2-(*p*-tolyl)vinyl)-3-(((4-methoxyphenyl)amino)methyl)benzaldehyde (**4i**)** was synthesized by following Procedure B. The crude material was purified by column chromatography (SiO<sub>2</sub>, petroleum ether: EtOAc = 10:1) to provide **4i** as a yellow solid (36.2 mg, 71% yield).

<sup>1</sup>H NMR (600 MHz, (CD<sub>3</sub>)<sub>2</sub>SO) δ 10.35 (dd, *J* = 4.1, 0.8 Hz, 1H), 7.59 – 7.51 (m, 2H), 7.38 – 7.30 (m, 1H), 7.22 – 7.20 (m, 1H), 7.17 – 7.13 (m, 2H), 7.13 – 7.08 (m, 4H), 7.03 (s, 1H), 7.01 – 6.98 (m, 2H), 6.98 – 6.96 (m, 1H), 6.93 – 6.89 (m, 2H), 6.82 – 6.77 (m, 1H), 6.58 – 6.51 (m, 2H), 6.09 – 6.03 (m, 2H), 5.84 – 5.79 (m, 1H), 4.29 – 4.21 (m, 1H), 4.13 – 4.04 (m, 1H), 3.58 (d, *J* = 1.1 Hz, 3H), 2.29 – 2.16 (m, 3H).

<sup>13</sup>C NMR (151 MHz, (CD<sub>3</sub>)<sub>2</sub>SO) δ 192.2, 192.1, 150.7, 144.00, 143.95, 143.9, 143.8, 142.5, 142.4, 142.4, 142.3, 141.0, 140.9, 139.6, 139.5, 139.1, 136.6, 136.5, 134.1, 133.2, 133.1, 132.2, 130.7, 130.6, 130.3, 129.2, 129.2, 128.8, 128.5, 128.1, 128.03, 127.97, 127.9, 127.8, 127.2, 127.0, 126.9, 126.2, 126.1, 114.5, 114.5, 113.0, 55.2, 44.8, 20.8.

**HRMS:** (ESI) *m/z*: [M+H]<sup>+</sup> Calcd for C<sub>36</sub>H<sub>32</sub>NO<sub>2</sub><sup>+</sup> 510.2428; Found 510.2422.

**Optical** [α]<sub>D</sub><sup>25</sup> = -3.64 (*c* = 0.14, CH<sub>2</sub>Cl<sub>2</sub>, 85% ee, 80% ee).

**HPLC** (AD-H, <sup>i</sup>PrOH/*n*-hexane = 20/80, flow rate = 0.5 mL/min, 254 nm) *t*<sub>R</sub> = 30.2 min (major), 33.2 min (minor). *t*<sub>R</sub> = 46.2 min (major), 43.4 min (minor).

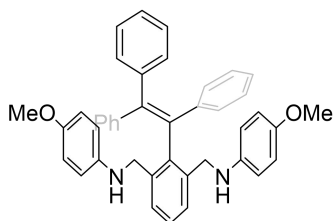

<sup>1</sup>H NMR (400 MHz, (CD<sub>3</sub>)<sub>2</sub>SO) δ 7.22 (d, *J* = 6.3 Hz, 4H), 7.17 – 7.07 (m, 11H), 7.02 – 6.92 (m, 5H), 6.60 – 6.51 (m, 4H), 6.13 – 6.05 (m, 4H), 4.27 – 4.10 (m, 4H), 3.59 (s, 6H).

## 4. Synthetic Applications

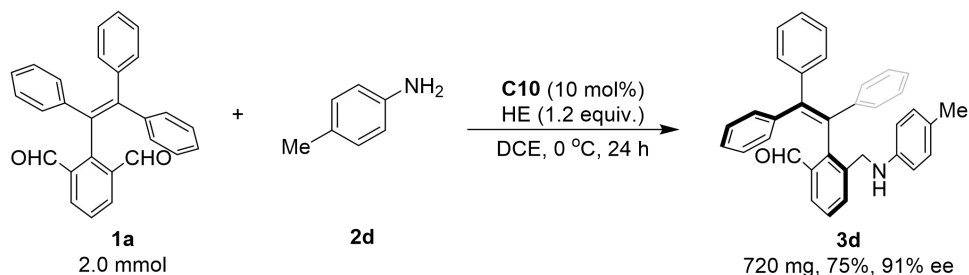

Under air atmosphere, TAE dialdehyde **1a** (2.0 mmol, 796.3 mg), aromatic amine **2d** (214.3 mg, 2.0 mmol, 1.0 equiv.), **C10** (138.2 mg, 0.2 mmol, 10 mol%) and HE (729.8 mg, 2.4 mmol, 1.2 equiv.) were placed in a reaction tube and anhydrous DCE (20.0 mL) was added into this reaction mixture via syringe, and stirred at 0 °C for 24 h. After completion of the reaction, the crude mixture was purified by column chromatography on silica gel to afford the corresponding product **3d** (720 mg, 75% yield, 91% ee).

**HPLC conditions: Chiralpak IA, 20% <sup>i</sup>PrOH/Hx eluent, 0.5 mL/min, 254 nm**

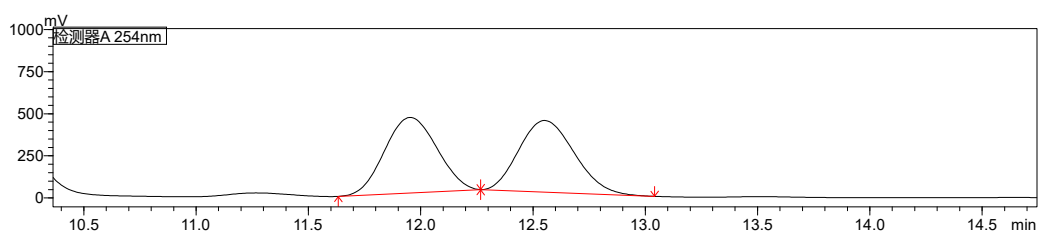

| Peak# | Ret. Time | Height | Area%  |
|-------|-----------|--------|--------|
| 1     | 11.953    | 448209 | 49.934 |
| 2     | 12.551    | 425045 | 50.066 |

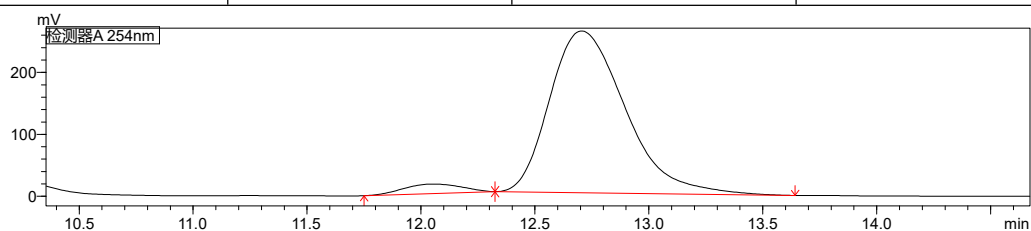

| Peak# | Ret. Time | Height | Area%  |
|-------|-----------|--------|--------|
| 1     | 12.054    | 15346  | 4.333  |
| 2     | 12.704    | 261134 | 95.667 |

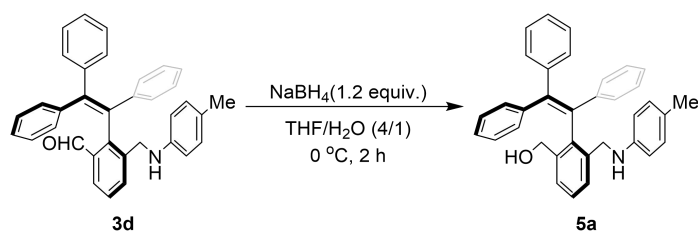

To a solution of **3d** (47.9 mg, 0.10 mmol, 1.0 equiv.) in THF/H<sub>2</sub>O (4:1 v/v, 10.0 mL) was added NaBH<sub>4</sub> (4.5 mg, 0.12 mmol, 1.2 equiv.) under air. The mixture was stirred for another 2 h and quenched with saturated aqueous NH<sub>4</sub>Cl and extracted with ethyl acetate. The organic layer was combined, dried over anhydrous Na<sub>2</sub>SO<sub>4</sub> and concentrated. The crude product was purified by silica gel column chromatography (PE/EA = 5:1) to afford **5a** as colorless solid (29.4 mg, 61% yield, 91% ee). <sup>1</sup>H NMR (600 MHz, (CD<sub>3</sub>)<sub>2</sub>SO) δ 7.31 (d, *J* = 7.6 Hz, 1H), 7.23 – 7.19 (m, 3H), 7.16 (t, *J* = 7.8 Hz, 1H), 7.12 – 7.06 (m, 9H), 6.98 – 6.94 (m, 4H), 6.71 (d, *J* = 8.0 Hz, 2H), 6.04 – 5.98 (m, 2H), 5.86 (t, *J* = 6.1 Hz, 1H), 5.18 (t, *J* = 5.5 Hz, 1H), 4.49 – 4.41 (m, 1H), 4.41 – 4.35 (m, 1H), 4.16 (d, *J* = 6.1 Hz, 2H), 2.08 (s, 3H). <sup>13</sup>C NMR (151 MHz, (CD<sub>3</sub>)<sub>2</sub>SO) δ 146.3, 142.8, 142.6, 141.8, 140.7, 140.3, 137.9, 137.0, 135.7, 130.9, 130.1, 129.22, 129.19, 128.1, 127.7, 127.6, 127.1, 126.9, 126.6, 124.5, 124.4, 123.9, 112.1, 61.0, 44.8, 20.0. **HRMS:** (ESI) *m/z*: [M+H]<sup>+</sup> Calcd for C<sub>35</sub>H<sub>32</sub>NO<sup>+</sup> 482.2478; Found 482.2472. **Optical** [α]<sub>D</sub><sup>25</sup> = 0.75 (*c* = 0.13, CH<sub>2</sub>Cl<sub>2</sub>, 91% ee). **HPLC** (IA, <sup>t</sup>PrOH/n-hexane = 20/80, flow rate = 0.5 mL/min, 254 nm) *t*<sub>R</sub> = 17.4 min (major), 14.5 min (minor).

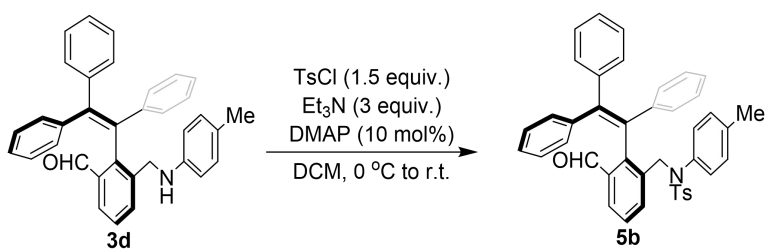

To a solution of **3d** (47.9 mg, 0.10 mmol, 91% ee) and 4-toluene sulfonyl chloride (47.5 mg, 0.25 mmol) in DCM (2.0 mL) was added Et<sub>3</sub>N (30.5 mg, 0.30 mmol) and DMAP (1.2 mg, 0.010 mmol) at 0 °C, then the mixture was allowed to warm to room temperature and stirred for 12 h, after which the mixture was filtered and the solvent was removed in vacuo. The residue was purified with flash chromatography (PE/EA = 10:1) to afford the product **5b** (32.3 mg, 51% yield, 89%

ee). **<sup>1</sup>H NMR** (600 MHz, (CD<sub>3</sub>)<sub>2</sub>SO) δ 10.19 (s, 1H), 7.86 – 7.74 (m, 1H), 7.64 – 7.51 (m, 1H), 7.43 – 7.40 (m, 2H), 7.34 – 7.31 (m, 2H), 7.23 – 7.21 (m, 3H), 7.15 – 7.08 (m, 2H), 7.08 – 7.03 (m, 4H), 7.02 – 6.99 (m, 4H), 6.97 – 6.94 (m, 2H), 6.76 – 6.72 (m, 2H), 6.66 – 6.63 (m, 2H), 6.63 – 6.60 (m, 1H), 4.61 – 4.37 (m, 2H), 2.41 (s, 3H), 2.26 – 2.23 (m, 3H). **<sup>13</sup>C NMR** (151 MHz, (CD<sub>3</sub>)<sub>2</sub>SO) δ 191.7, 145.0, 143.9, 143.4, 141.9, 141.8, 140.7, 137.7, 136.2, 135.5, 134.2, 134.0, 133.0, 132.9, 130.6, 130.2, 129.8, 129.7, 129.6, 129.3, 128.1, 128.0, 127.8, 127.7, 127.3, 120.5, 51.4, 21.0. **HRMS:** (ESI) m/z: [M+H]<sup>+</sup> Calcd for C<sub>42</sub>H<sub>36</sub>NO<sub>3</sub>S<sup>+</sup> 634.2410; Found 634.2403. **Optical** [α]<sub>D</sub><sup>25</sup> = -0.90 (c = 0.08, CH<sub>2</sub>Cl<sub>2</sub>, 89% ee). **HPLC** (AD-H, *i*PrOH/n-hexane = 10/90, flow rate = 0.5 mL/min, 254 nm) t<sub>R</sub> = 28.3 min (major), 31.5 min (minor).

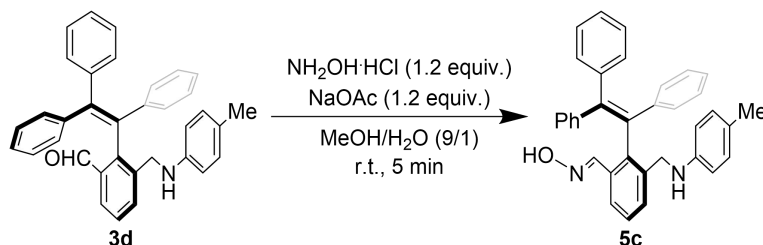

**3a** (47.9 mg, 0.10 mmol, 1.0 equiv.), NH<sub>2</sub>OH·HCl (0.12 mmol) and NaOAc (0.12 mmol) were stirred at 25 °C for 5 min in a 9:1 mixture of MeOH/ H<sub>2</sub>O (1.5 mL) under air. The progress of the reaction was monitored by TLC. After completion, the reaction mixture was cooled to room temperature and treated with saturated aqueous NH<sub>4</sub>Cl (1 mL). The organic layer was combined, dried over anhydrous Na<sub>2</sub>SO<sub>4</sub> and concentrated. The crude product was purified by silica gel column chromatography (PE/EA = 1:1) to afford the desired product **5c** as colorless oil (27.8 mg, 56% yield, 91% ee). **<sup>1</sup>H NMR** (600 MHz, (CD<sub>3</sub>)<sub>2</sub>SO) δ 11.26 (s, 1H), 8.34 (s, 1H), 7.55 (dd, *J* = 7.7, 1.4 Hz, 1H), 7.23 – 7.20 (m, 4H), 7.16 (d, *J* = 7.7 Hz, 1H), 7.14 – 7.10 (m, 6H), 7.10 – 7.07 (m, 2H), 6.95 – 6.92 (m, 4H), 6.74 – 6.69 (m, 2H), 6.03 – 5.99 (m, 2H), 5.94 (t, *J* = 6.1 Hz, 1H), 4.26 – 4.14 (m, 2H), 2.08 (s, 3H). **<sup>13</sup>C NMR** (151 MHz, (CD<sub>3</sub>)<sub>2</sub>SO) δ 146.7, 146.1, 143.0, 142.5, 142.4, 140.7, 139.8, 138.3, 134.9, 131.4, 130.7, 130.0, 129.2, 129.1, 128.2, 128.0, 127.7, 127.4, 127.2, 126.9, 124.1, 123.3, 112.1, 44.7, 20.0, 14.1. **HRMS:** (ESI) m/z: [M+H]<sup>+</sup> Calcd for C<sub>35</sub>H<sub>31</sub>N<sub>2</sub>O<sup>+</sup> 495.2431; Found 495.2425. **Optical** [α]<sub>D</sub><sup>25</sup> = -0.14 (c = 0.06, CH<sub>2</sub>Cl<sub>2</sub>, 91% ee). **HPLC** (IA, *i*PrOH/n-hexane = 20/80, flow rate = 0.5 mL/min, 254 nm) t<sub>R</sub> = 13.2 min (major), 14.8 min (minor).

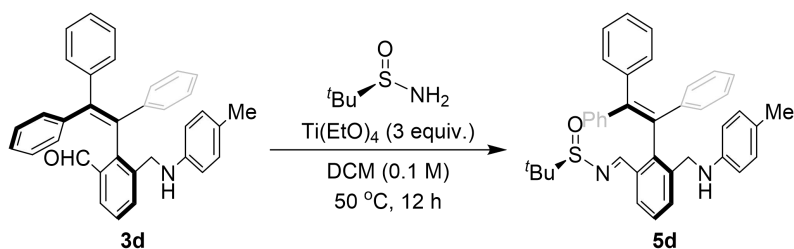

The **3d** (47.9 mg, 0.1 mmol), (*R*)-(+)-2-Methyl-2-propanesulfonamide (36.5 mg, 0.3 mmol), and  $\text{Ti}(\text{OEt})_4$  (0.78 mL, 3.5 mmol) were mixed and stirred at 2 mL DCM at 50 °C. After reflux overnight, add 10 mL of water to the solution and filter through sand core funnel. The filtrate was extracted with DCM for three times and the organic phase was collected. The organic phase was dried with anhydrous sodium sulfate and concentrated in vacuo to give a residue, which was purified by flash chromatography (PE/EA = 10:1) to afford the products **5d** as white solid. (42.0 mg, 72% yield, > 20/1 dr).  $^1\text{H NMR}$  (600 MHz,  $(\text{CD}_3)_2\text{SO}$ )  $\delta$  7.23 – 7.20 (m, 3H), 7.17 (d,  $J = 7.1$  Hz, 1H), 7.13 (d,  $J = 7.5$  Hz, 2H), 7.10 (dd,  $J = 7.6, 4.0$  Hz, 8H), 7.02 – 6.98 (m, 4H), 6.72 (d,  $J = 8.1$  Hz, 2H), 6.10 (t,  $J = 6.1$  Hz, 1H), 6.02 (d,  $J = 8.0$  Hz, 2H), 5.87 (t,  $J = 6.1$  Hz, 1H), 5.70 (t,  $J = 2.1$  Hz, 1H), 5.54 (d,  $J = 2.1$  Hz, 2H), 4.19 – 4.13 (m, 3H), 4.11 – 4.06 (m, 1H), 3.58 (s, 6H), 2.08 (s, 3H).  $^{13}\text{C NMR}$  (151 MHz,  $(\text{CD}_3)_2\text{SO}$ )  $\delta$  165.2, 161.8, 161.3, 146.0, 143.8, 142.9, 142.1, 140.3, 139.9, 139.4, 134.0, 130.5, 130.1, 129.2, 128.9, 128.2, 128.0, 127.7, 127.2, 125.3, 124.2, 122.7, 112.1, 61.2, 57.5, 44.6, 22.1, 20.0. **HRMS:** (ESI)  $m/z$ :  $[\text{M}+\text{H}]^+$  Calcd for  $\text{C}_{39}\text{H}_{39}\text{N}_2\text{OS}^+$  583.2778; Found 583.2772. **Optical**  $[\alpha]_{\text{D}}^{25} = -14.83$  ( $c = 0.18, \text{CH}_2\text{Cl}_2$ ).

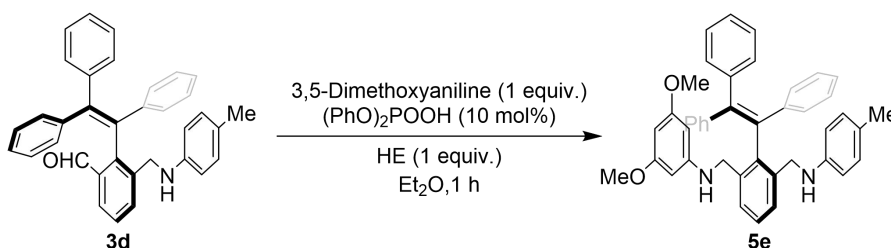

A 25 mL vial containing a magnetic stir bar, was added **5a** (47.9 mg, 0.1 mmol, 1.0 equiv.), diphenyl phosphate (2.5 mg, 0.01 mmol, 0.1 equiv.), HE (25.0 mg, 0.1 mmol, 1.0 equiv.), 3,4,5-trimethoxyaniline (18.0 mg, 0.1 mmol, 1.0 equiv.) and 7.5 mL dry  $\text{Et}_2\text{O}$ . After stirring at the 25 °C for 1 h, the reaction mixture concentrated in vacuo to give a residue, which was purified by flash chromatography (PE/EA = 10:1) to afford the products **5e** as Black green oil (28.4 mg, 46% yield, 87% ee).  $^1\text{H NMR}$

(600 MHz, (CD<sub>3</sub>)<sub>2</sub>SO)  $\delta$  7.23 – 7.20 (m, 3H), 7.17 (d,  $J$  = 7.1 Hz, 1H), 7.13 (d,  $J$  = 7.5 Hz, 2H), 7.10 (dd,  $J$  = 7.6, 4.0 Hz, 8H), 7.02 – 6.98 (m, 4H), 6.72 (d,  $J$  = 8.1 Hz, 2H), 6.10 (t,  $J$  = 6.1 Hz, 1H), 6.02 (d,  $J$  = 8.0 Hz, 2H), 5.87 (t,  $J$  = 6.1 Hz, 1H), 5.70 (t,  $J$  = 2.1 Hz, 1H), 5.54 (d,  $J$  = 2.1 Hz, 2H), 4.19 – 4.13 (m, 3H), 4.11 – 4.06 (m, 1H), 3.58 (s, 6H), 2.08 (s, 3H). **<sup>13</sup>C NMR** (151 MHz, (CD<sub>3</sub>)<sub>2</sub>SO)  $\delta$  161.1, 150.6, 146.3, 142.8, 142.6, 142.2, 140.6, 138.9, 137.6, 137.5, 135.7, 130.9, 130.2, 129.2, 128.2, 127.8, 127.7, 127.3, 127.2, 127.0, 126.8, 124.7, 124.6, 123.9, 112.0, 90.8, 54.7, 44.9, 20.0. **HRMS:** (ESI)  $m/z$ : [M+H]<sup>+</sup> Calcd for C<sub>43</sub>H<sub>41</sub>N<sub>2</sub>O<sub>2</sub><sup>+</sup> 617.3163; Found 617.3154. **Optical** [ $\alpha$ ]<sub>D</sub><sup>25</sup> = -1.73 (c = 0.16, CH<sub>2</sub>Cl<sub>2</sub>, 87% ee). **HPLC** (IA, <sup>i</sup>PrOH/n-hexane = 20/80, flow rate = 0.5 mL/min, 254 nm)  $t_R$  = 33.0 min (major), 25.4 min (minor).

## 5. Mechanistic Experiments

### Racemization experiments.

Racemization of **3p** in toluene at 120 °C

| Time (h) | ee (%) | ln(e0/e) |
|----------|--------|----------|
| 0        | 91.474 | 0        |
| 2        | 89.412 | 0.0227   |
| 4        | 88.786 | 0.0298   |
| 6        | 86.298 | 0.0582   |
| 8        | 85.542 | 0.067    |
| 10       | 83.828 | 0.0873   |
| 12       | 81.868 | 0.111    |

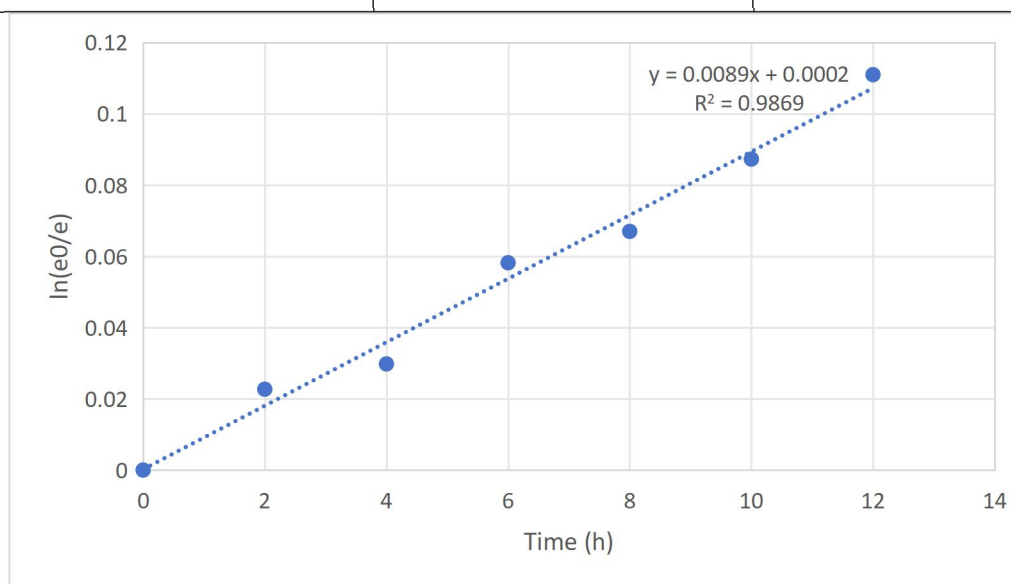

$$k_{\text{racemisation}} = 0.0089 \text{ h}^{-1}$$

$$k_{\text{enantiomerisation}} = 0.00445 \text{ h}^{-1}$$

$$\Delta G_{\ddagger}^{\text{enantiomerization}} = RT \times \ln \frac{k_B \times T}{h \times k_{\text{enantiomerisation}}}$$

$$\Delta G_{\ddagger}^{\text{enantiomerization}} = 141.66 \text{ KJ/mol} = 33.8 \text{ Kcal/mol}$$

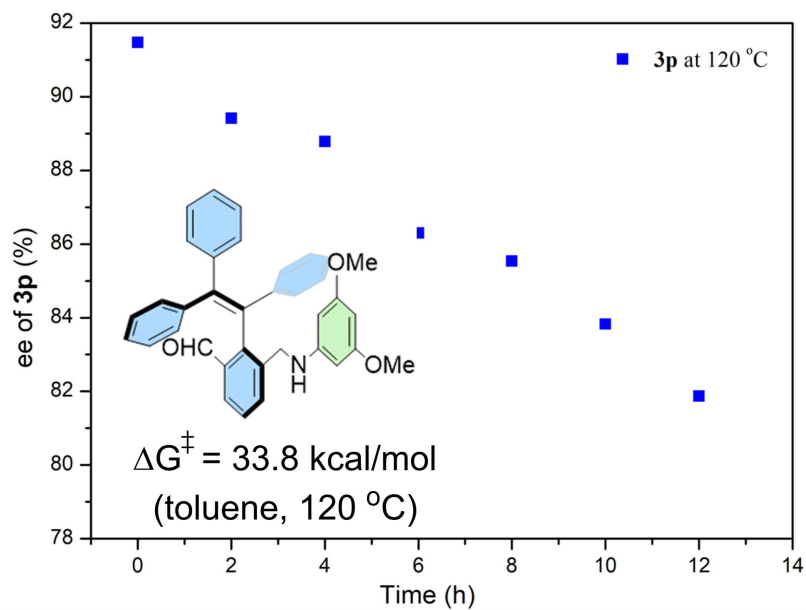

**Figure S1.** Racemization of **3p** in toluene

Racemization of **3ab** in Mesitylene at 140 °C

| Time (h) | ee (%) | $\ln(e_0/e)$ |
|----------|--------|--------------|
| 0        | 81.156 | 0            |
| 0.5      | 75.630 | 0.0705       |
| 1        | 70.042 | 0.1473       |
| 1.5      | 63.178 | 0.2504       |
| 2        | 58.428 | 0.3286       |
| 2.5      | 53.364 | 0.4192       |
| 3        | 50.268 | 0.4790       |

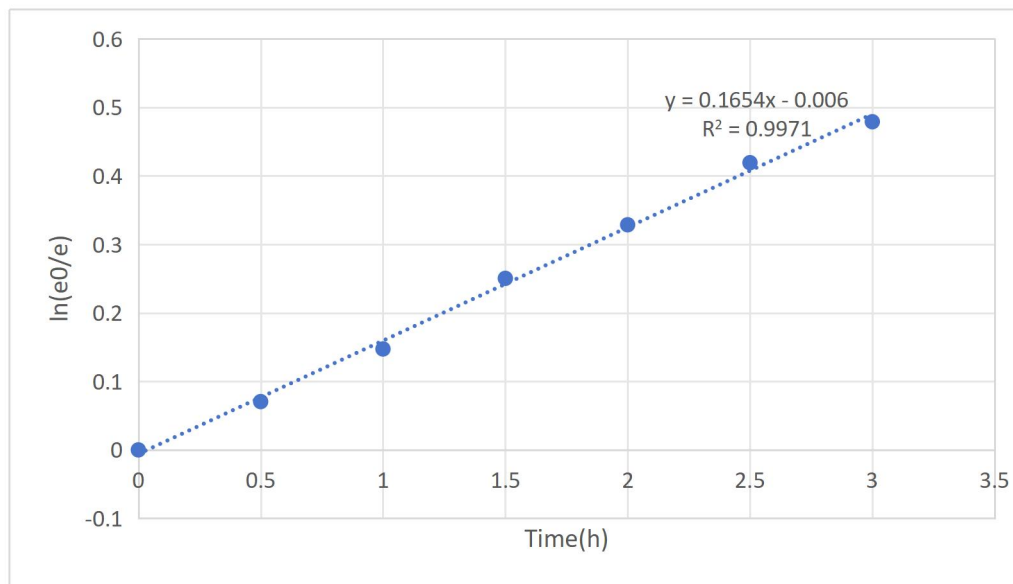

$$k_{\text{racemisation}} = 0.1654 \text{ h}^{-1}$$

$$k_{\text{enantiomerisation}} = 0.0827 \text{ h}^{-1}$$

$$\Delta G_{\ddagger}^{\text{enantiomerization}} = RT \times \ln \frac{k_B \times T}{h \times k_{\text{enantiomerisation}}}$$

$$\Delta G_{\ddagger}^{\text{enantiomerization}} = 139.00 \text{ KJ/mol} = 33.2 \text{ Kcal/mol}$$

## Non-linear effect.

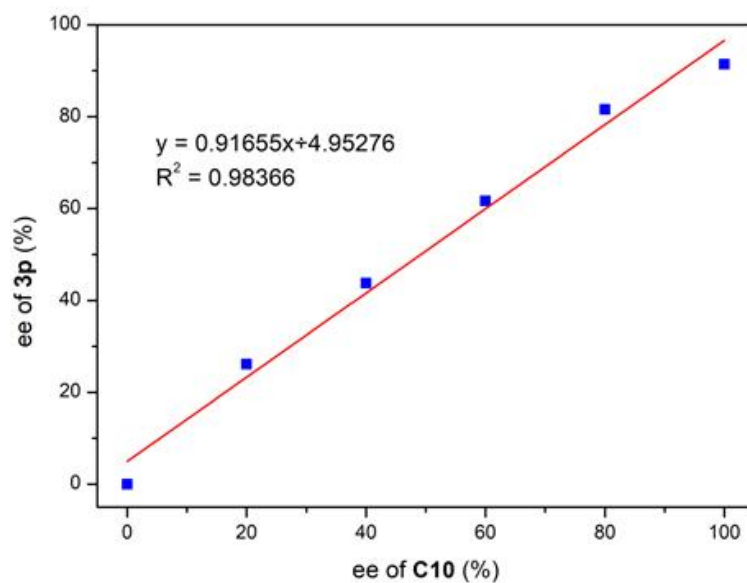

**Figure S2.** Non-linear effect of the C10

## Control experiment.

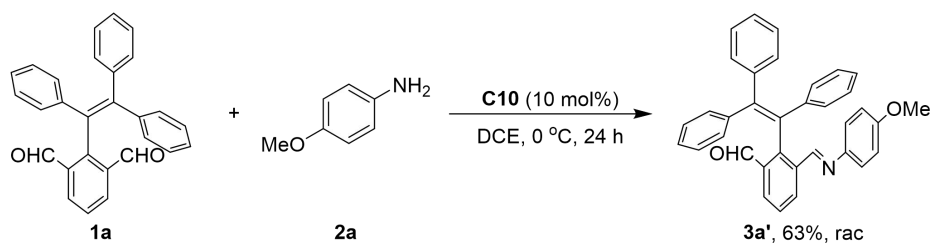

Under air atmosphere, TAE dialdehyde **1a** (0.1 mmol), aromatic amine **2a** (0.1 mmol, 1.0 equiv.) and **C10** (6.9 mg, 0.01 mmol, 10 mol%) were placed in a reaction tube and anhydrous DCE (1.0 mL) was added into this reaction mixture via syringe, and stirred at 0 °C for 24 h. After completion of the reaction, the crude mixture was purified by column chromatography on silica gel to afford the corresponding product **3a'** (31.2 mg, 63% yield).

## HPLC conditions: Chiralpak AD, 20% *i*PrOH/Hx eluent, 0.5 mL/min, 254 nm

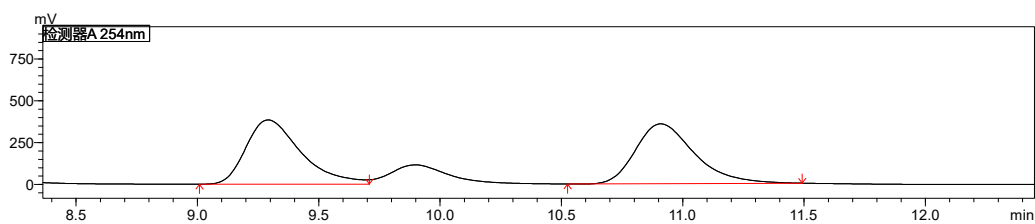

| Peak# | Ret. Time | Height  | Area%  |
|-------|-----------|---------|--------|
| 1     | 9.291     | 6113345 | 50.325 |
| 2     | 10.909    | 6034368 | 49.675 |

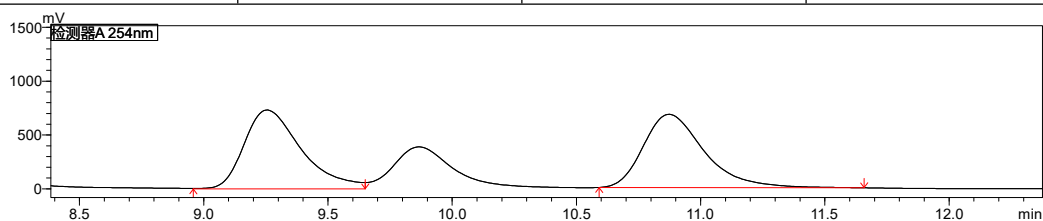

| Peak# | Ret. Time | Height   | Area%  |
|-------|-----------|----------|--------|
| 1     | 9.255     | 11806152 | 50.472 |
| 2     | 10.873    | 11585454 | 49.528 |

## Kinetic resolution.

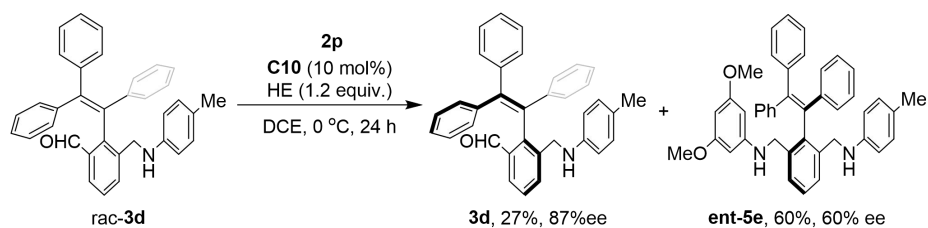

Under air atmosphere, *rac*-**3d** (0.1 mmol), **2p** (0.1 mmol, 1.0 equiv.), **C10** (6.9 mg, 0.01 mmol, 10 mol%) and **HE** (30.4 mg, 0.12 mmol, 1.2 equiv.) were placed in a reaction tube and anhydrous DCE (1.0 mL) was added into this reaction mixture via syringe, and stirred at 0 °C for 24 h. After completion of the reaction, the crude mixture was purified by column chromatography on silica gel to afford the corresponding product **ent-5e** (28.4 mg, 60% yield, 60% ee) and **3d** (12.9 mg, 27% yield, 87% ee).

**HPLC conditions: Chiralpak IA, 20% <sup>i</sup>PrOH/Hx eluent, 0.5 mL/min, 254 nm**

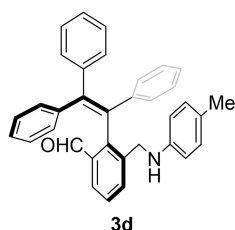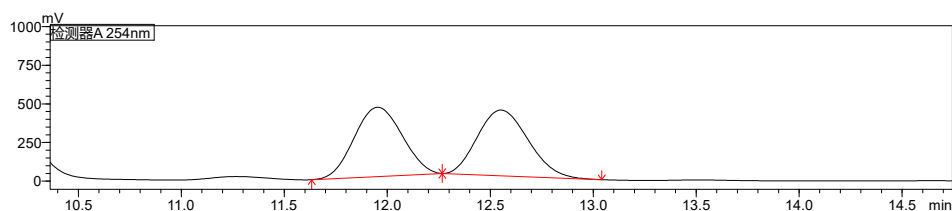

| Peak# | Ret. Time | Height | Area%  |
|-------|-----------|--------|--------|
| 1     | 11.953    | 448209 | 49.934 |
| 2     | 12.551    | 425045 | 50.066 |

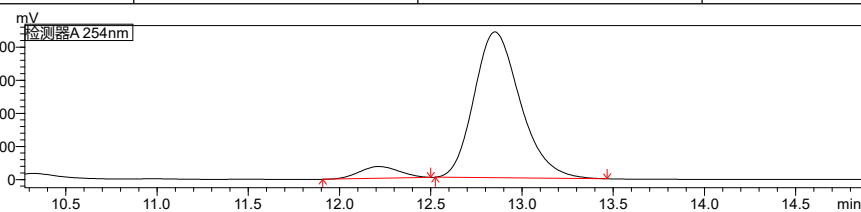

| Peak# | Ret. Time | Height | Area%  |
|-------|-----------|--------|--------|
| 1     | 12.215    | 35522  | 6.509  |
| 2     | 12.852    | 440575 | 93.491 |

HPLC conditions: Chiralpak IA, 20% *i*PrOH/Hx eluent, 0.5 mL/min, 254 nm

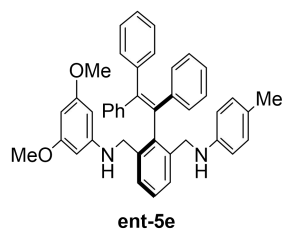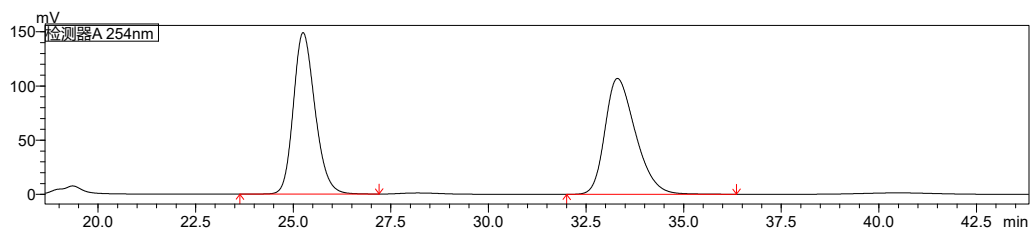

| Peak# | Ret. Time | Height | Area%  |
|-------|-----------|--------|--------|
| 1     | 25.250    | 149114 | 49.738 |
| 2     | 33.303    | 106910 | 50.262 |

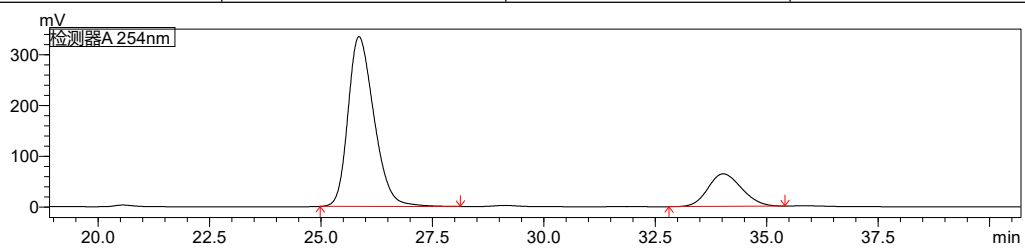

| Peak# | Ret. Time | Height | Area%  |
|-------|-----------|--------|--------|
| 1     | 25.852    | 334598 | 79.999 |
| 2     | 34.024    | 64186  | 20.001 |

## 6. Copies of Optical spectras

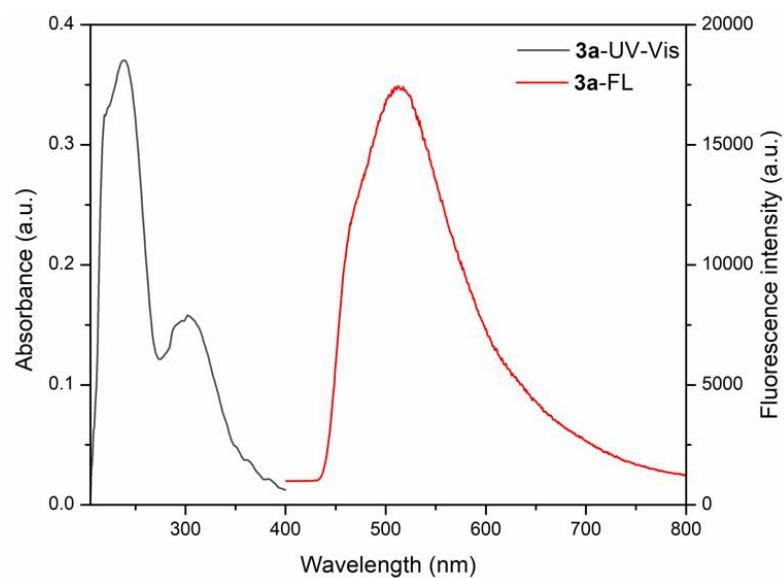

**Figure S3.** Absorption spectra and emission spectra of **3a** in THF at 25 °C (ca.  $1 \times 10^{-5}$  M).

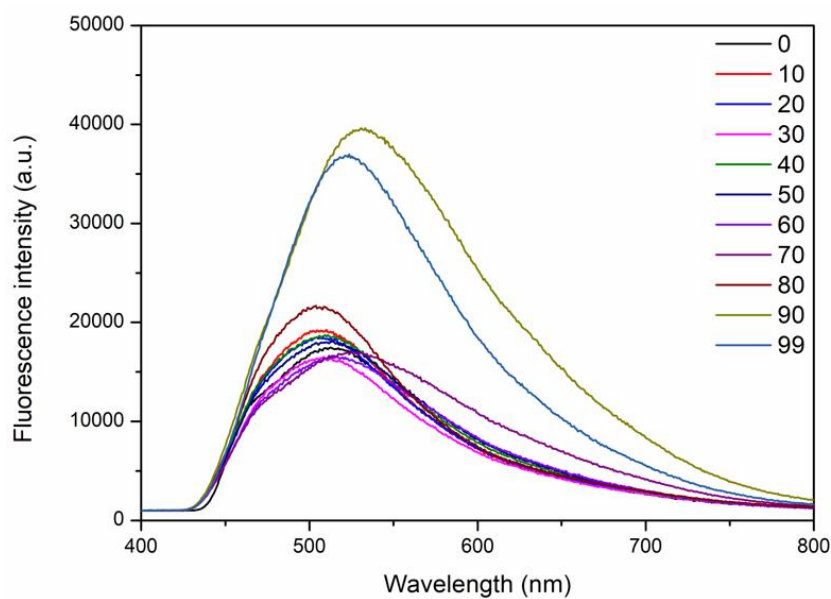

**Figure S4.** The PL intensity of **3a** in THF/H<sub>2</sub>O mixed solvents at 25 °C (ca.  $1 \times 10^{-5}$  M).

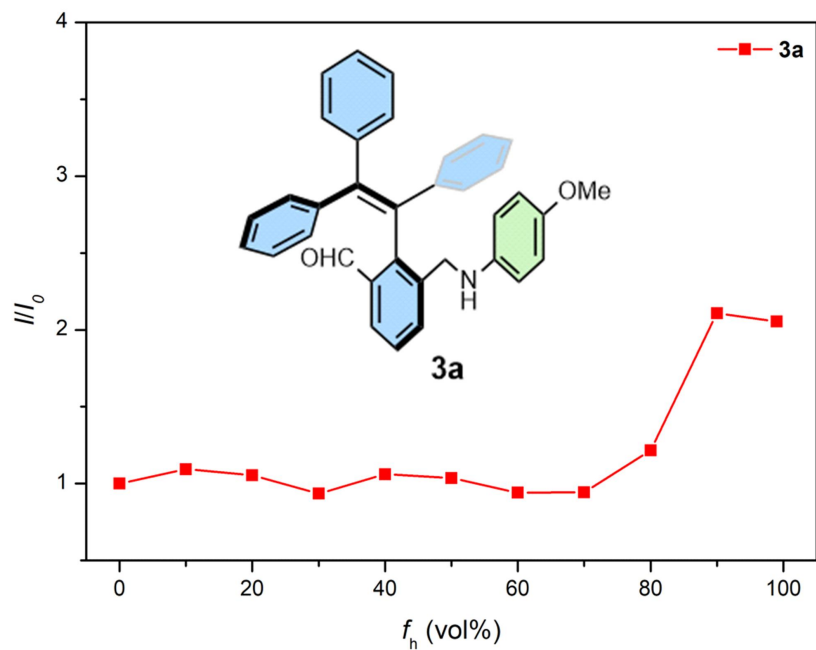

**Figure S5.** Relative PL intensity of **3a**.

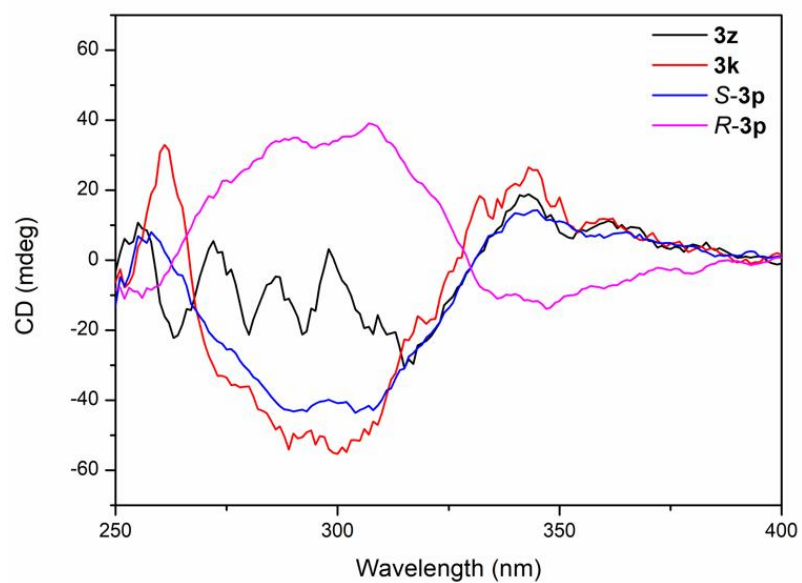

**Figure S6.** CD spectra of **3z**, **3k**, **S-3p** and **R-3p** in THF at 25 °C (ca.  $1 \times 10^{-3}$  M).

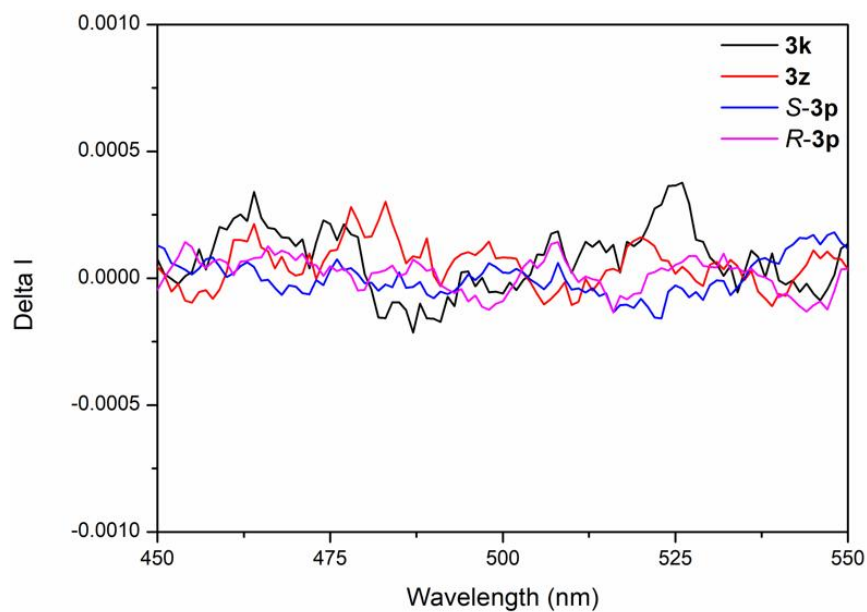

**Figure S7.** CPL spectra of **3z**, **3k**, **S-3p** and **R-3p** in THF at 25 °C (ca.  $1 \times 10^{-5}$  M).

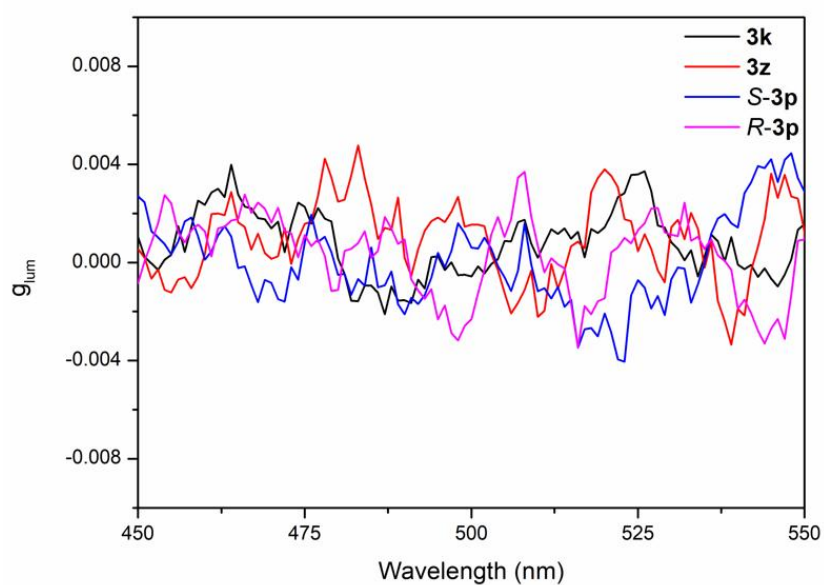

**Figure S8.** CPL ( $g_{lum}$ ) spectra of **3z**, **3k**, **S-3p** and **R-3p** in THF at 25 °C (ca.  $1 \times 10^{-5}$  M).

## 7. Copies of $^1\text{H}$ NMR, $^{13}\text{C}$ NMR and $^{19}\text{F}$ NMR Spectras

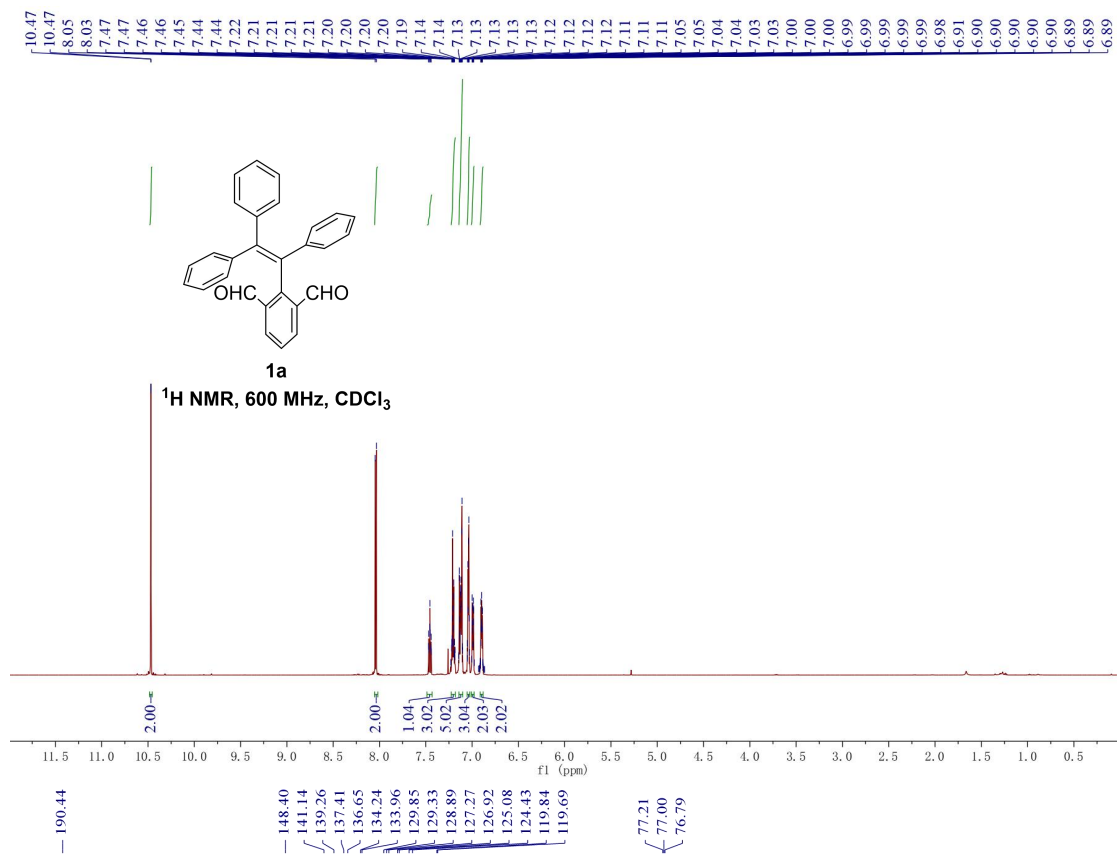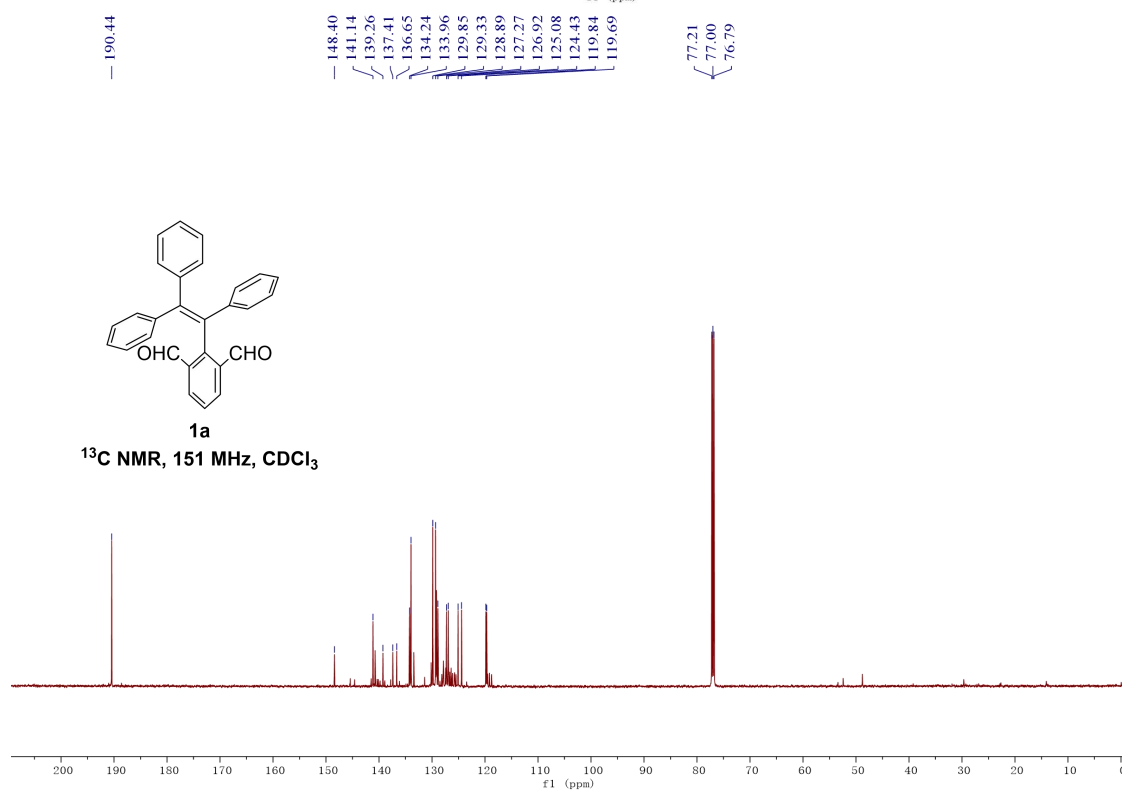

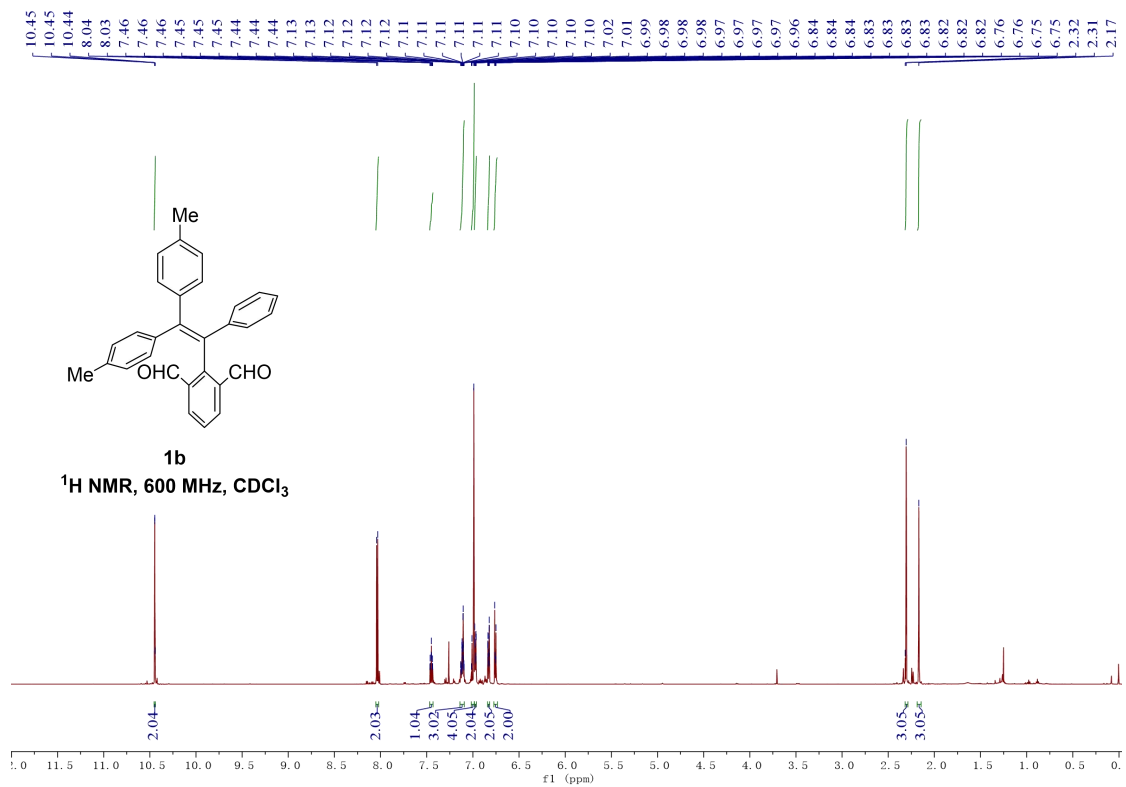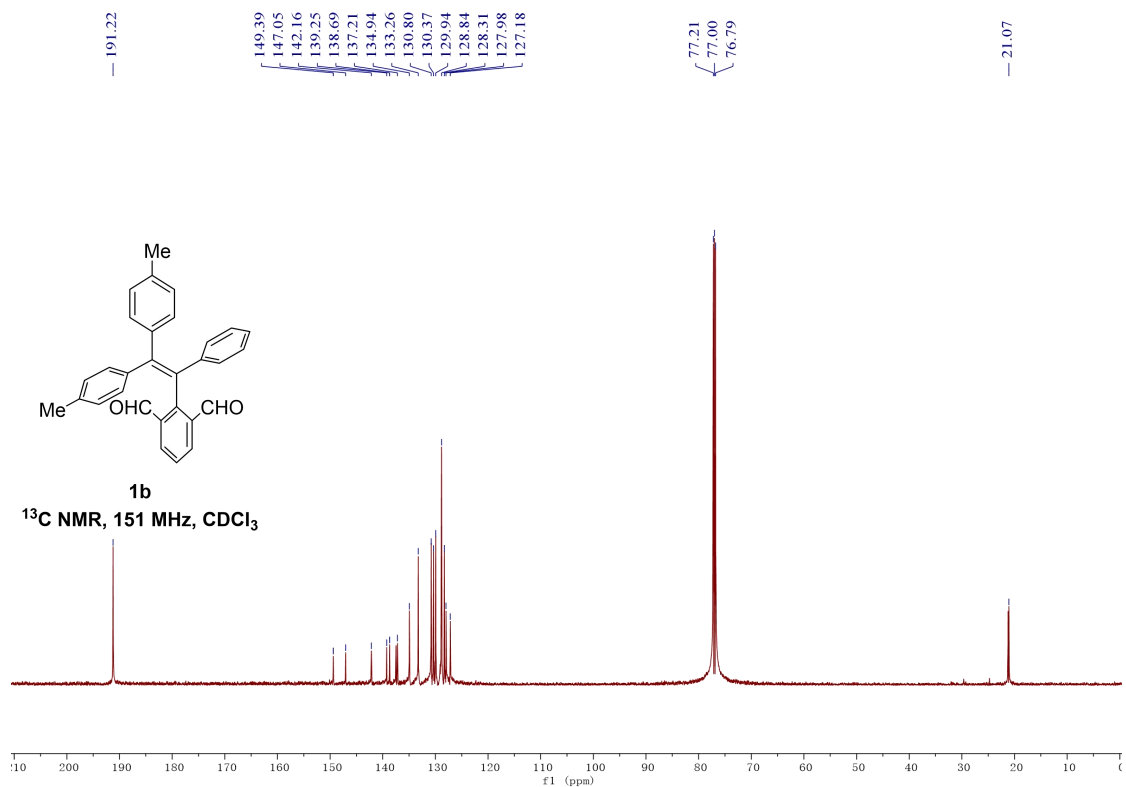

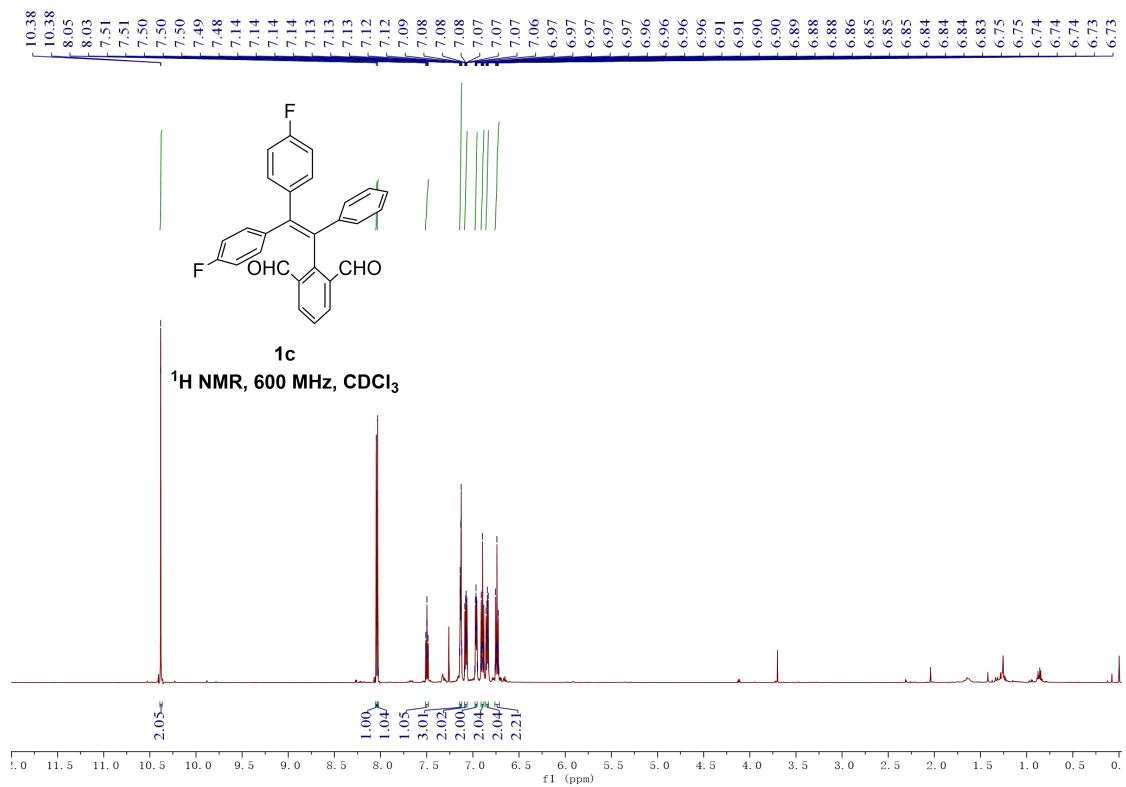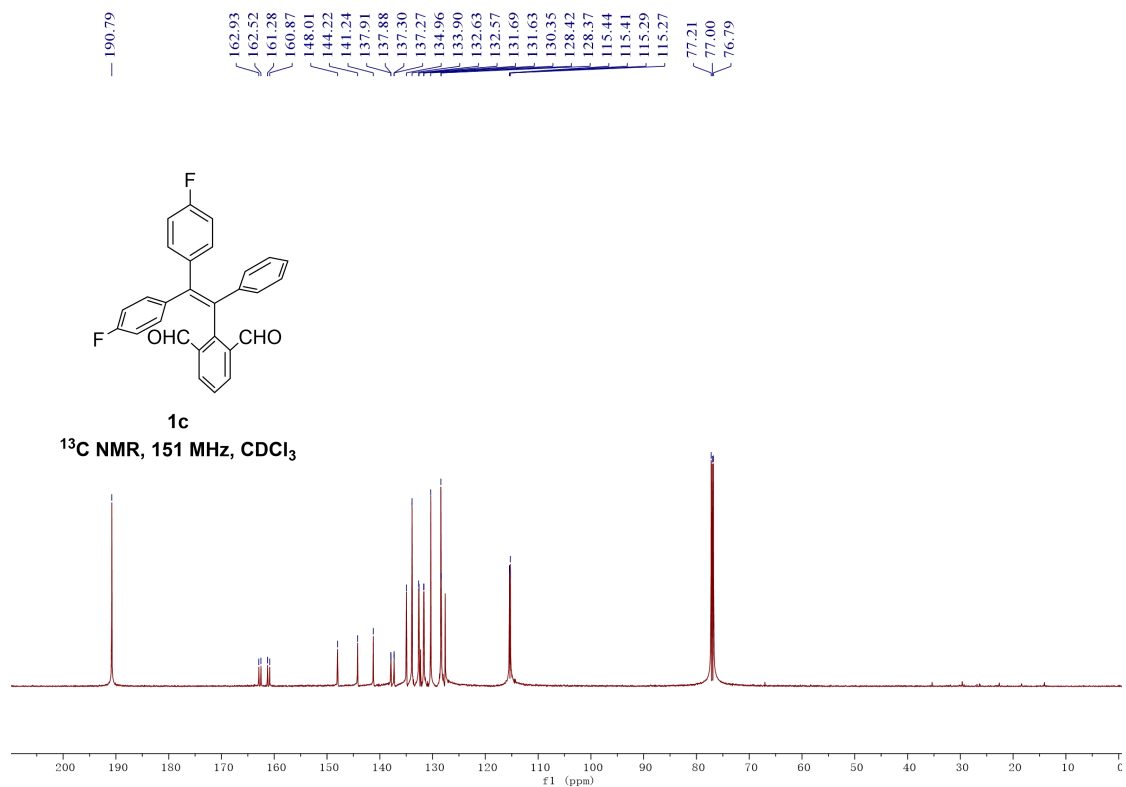

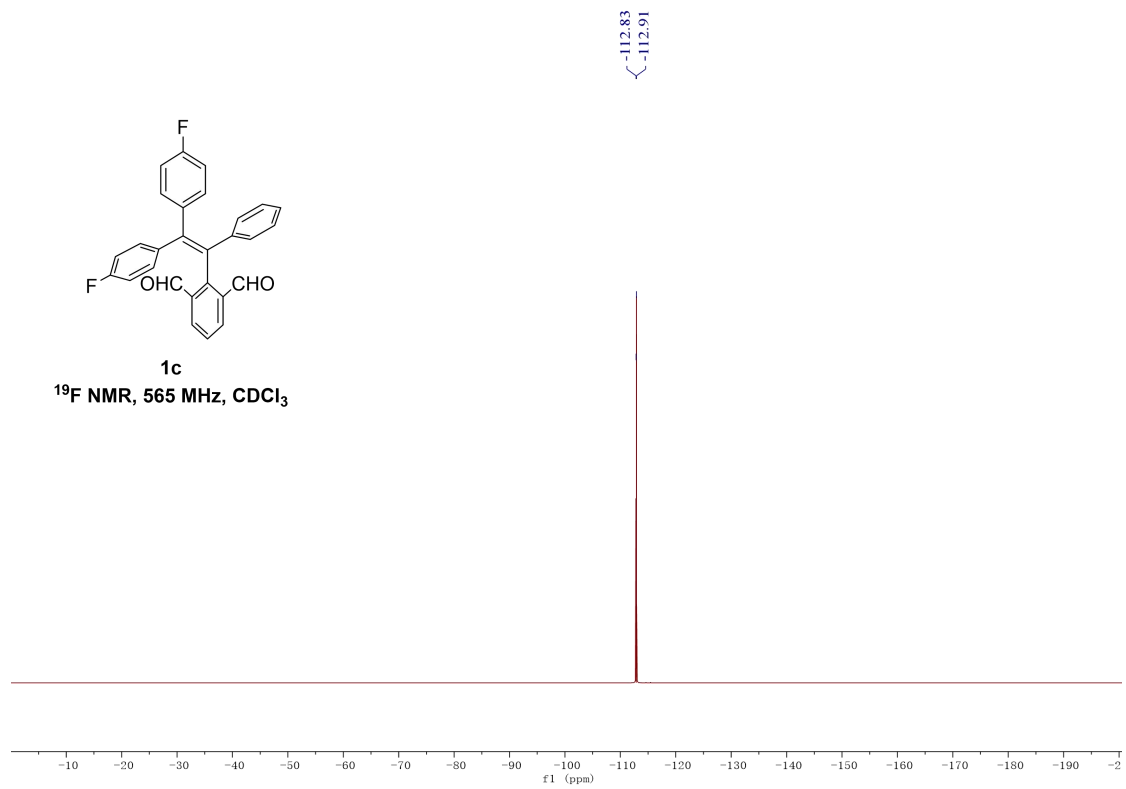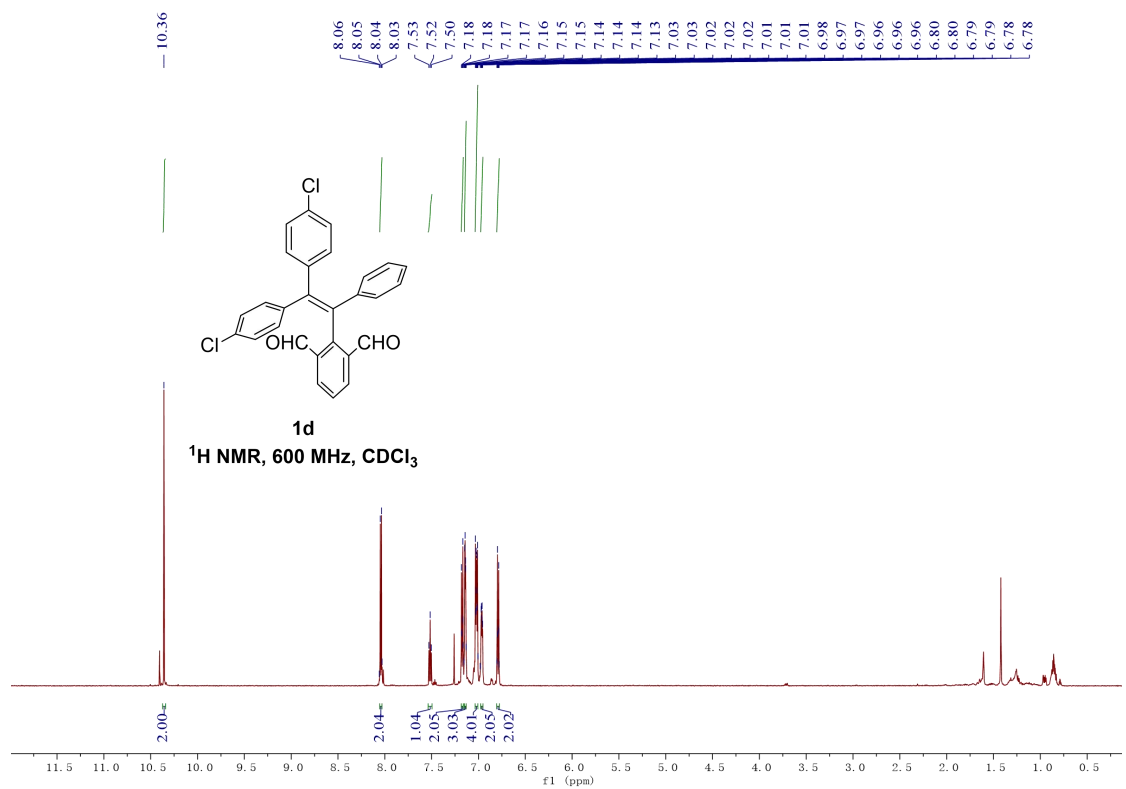

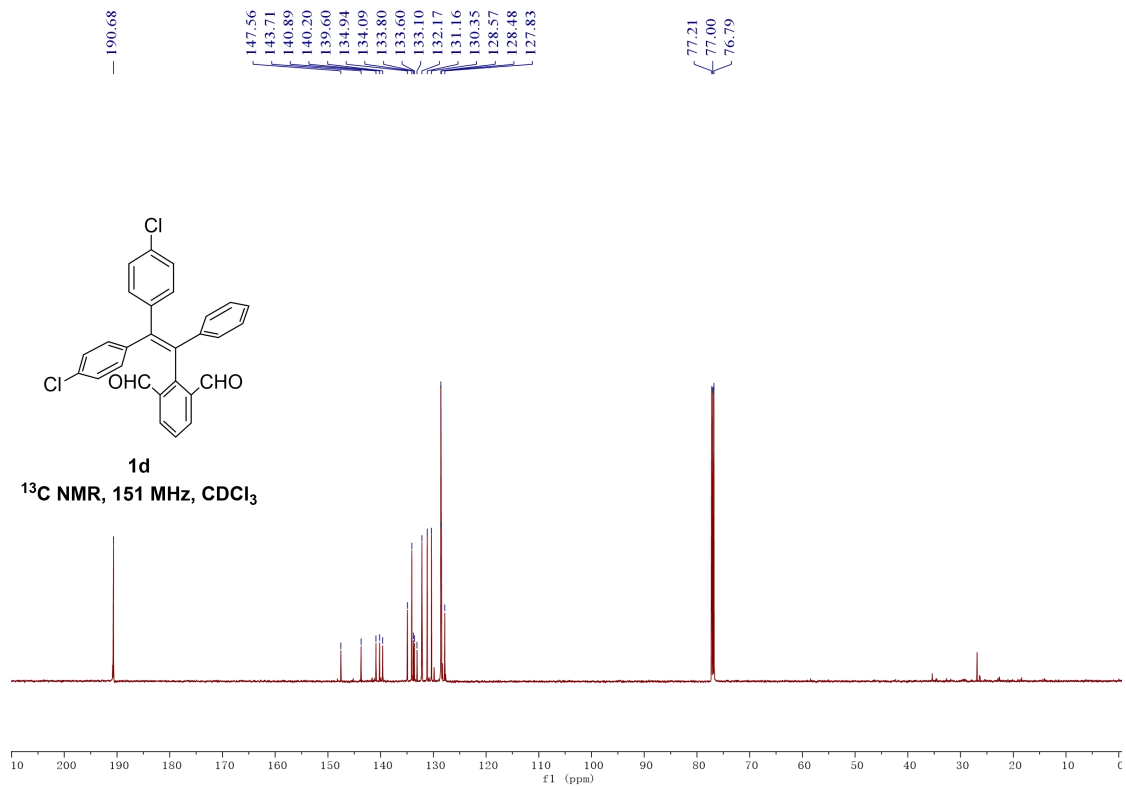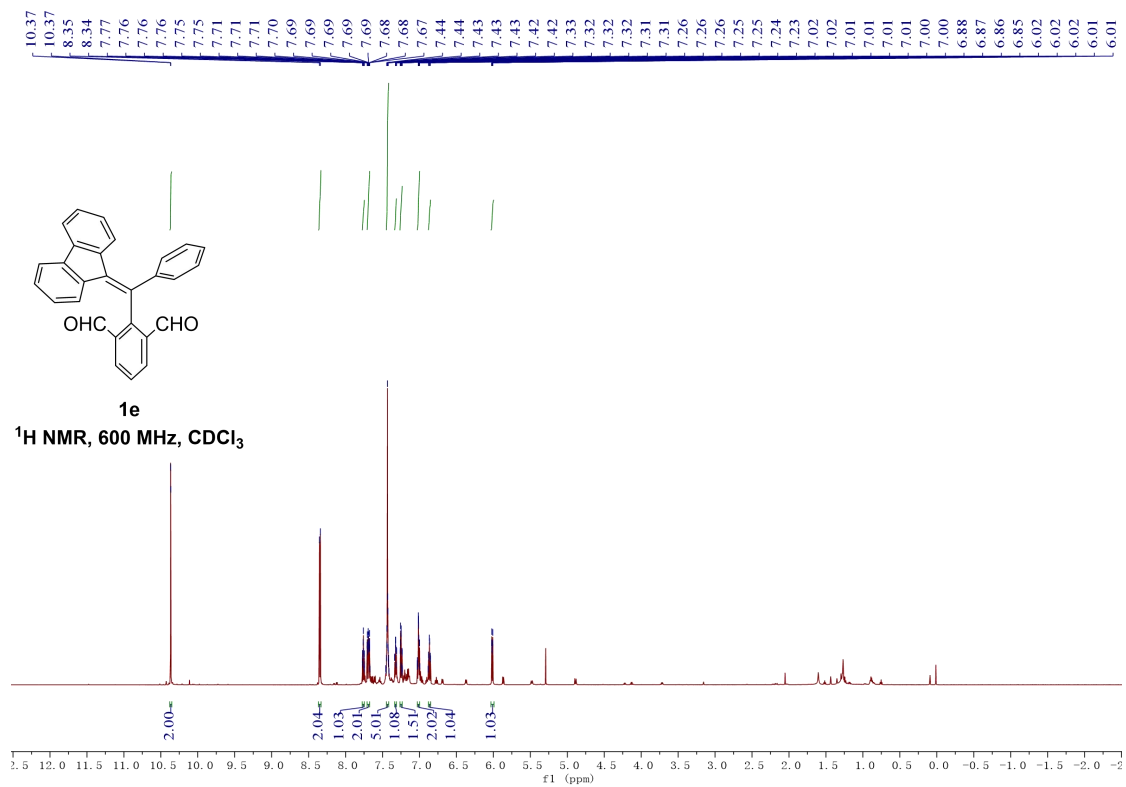

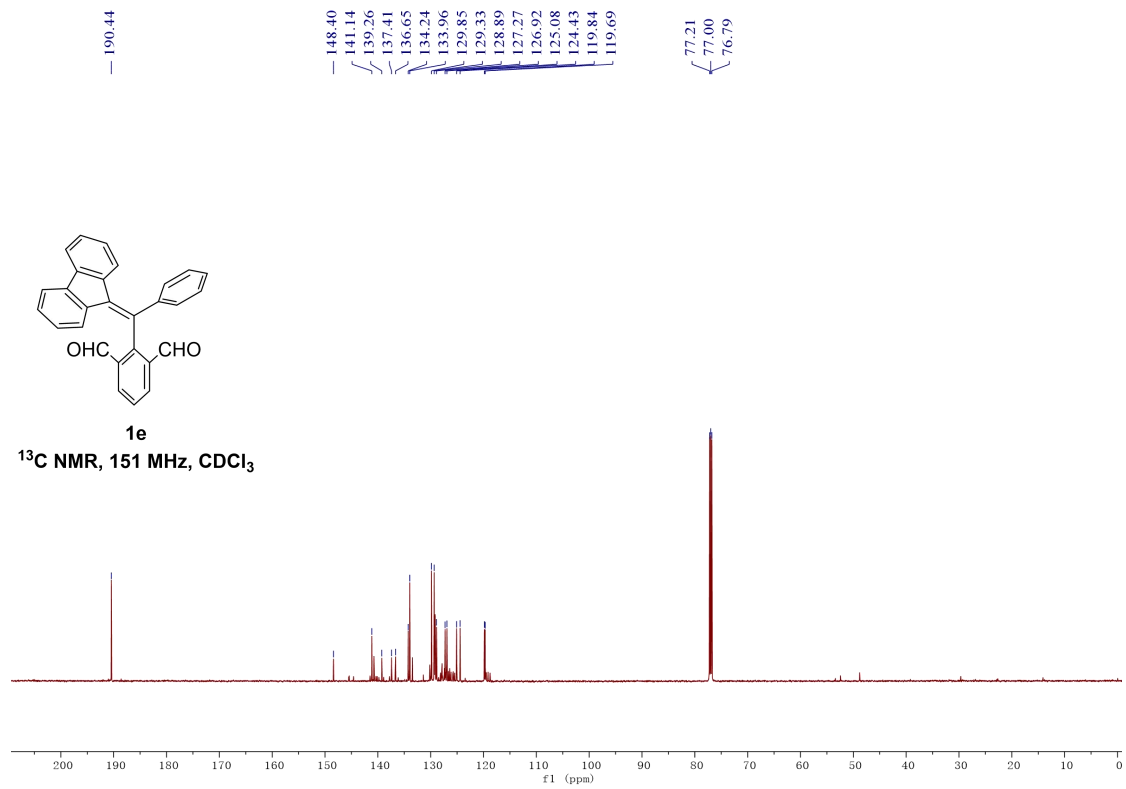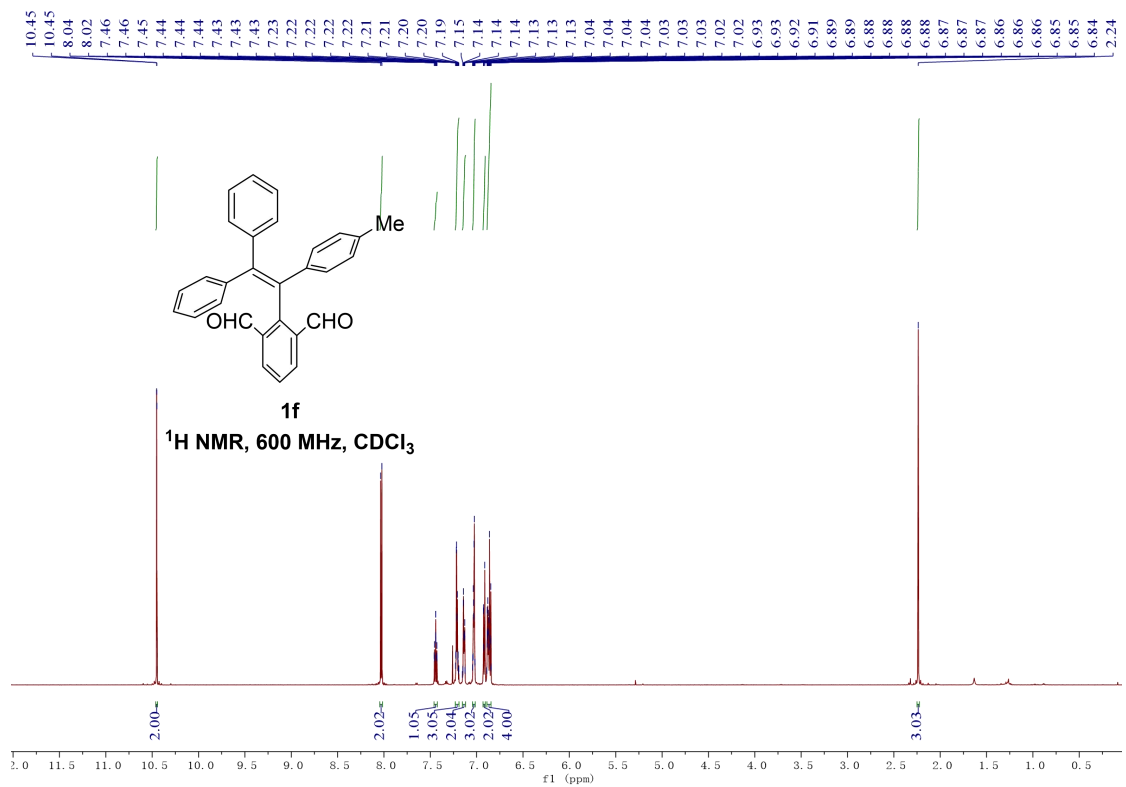

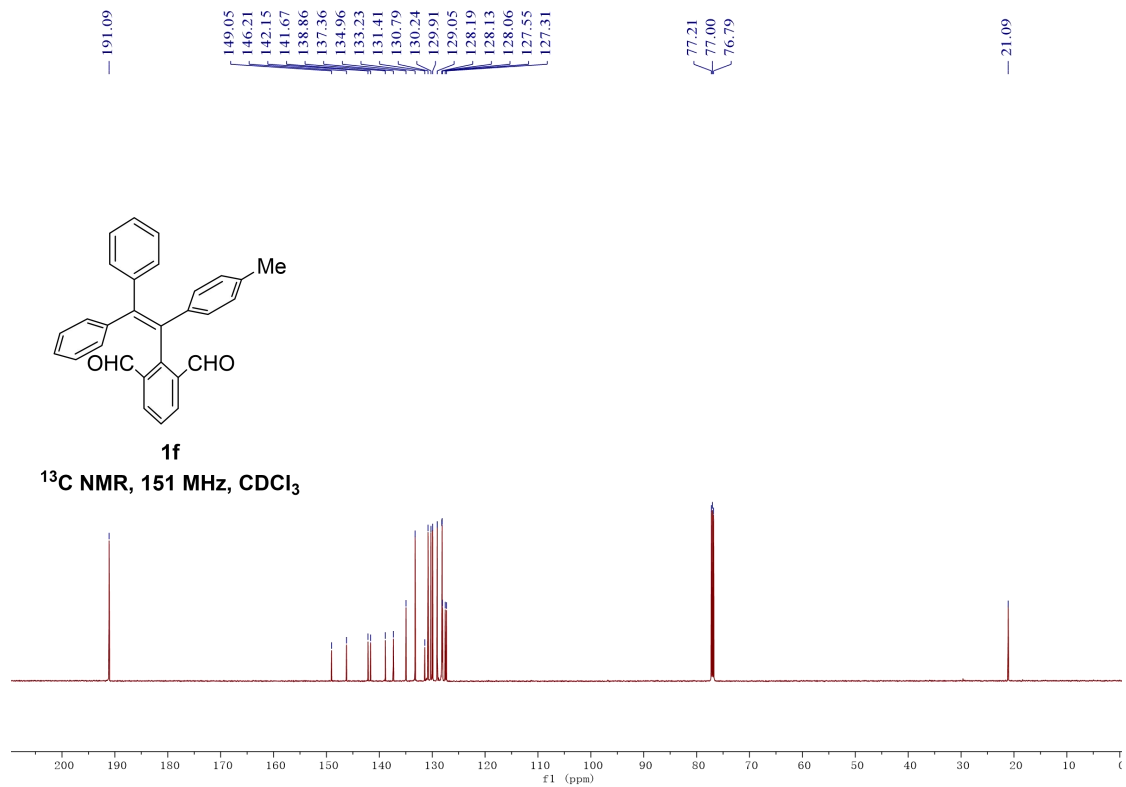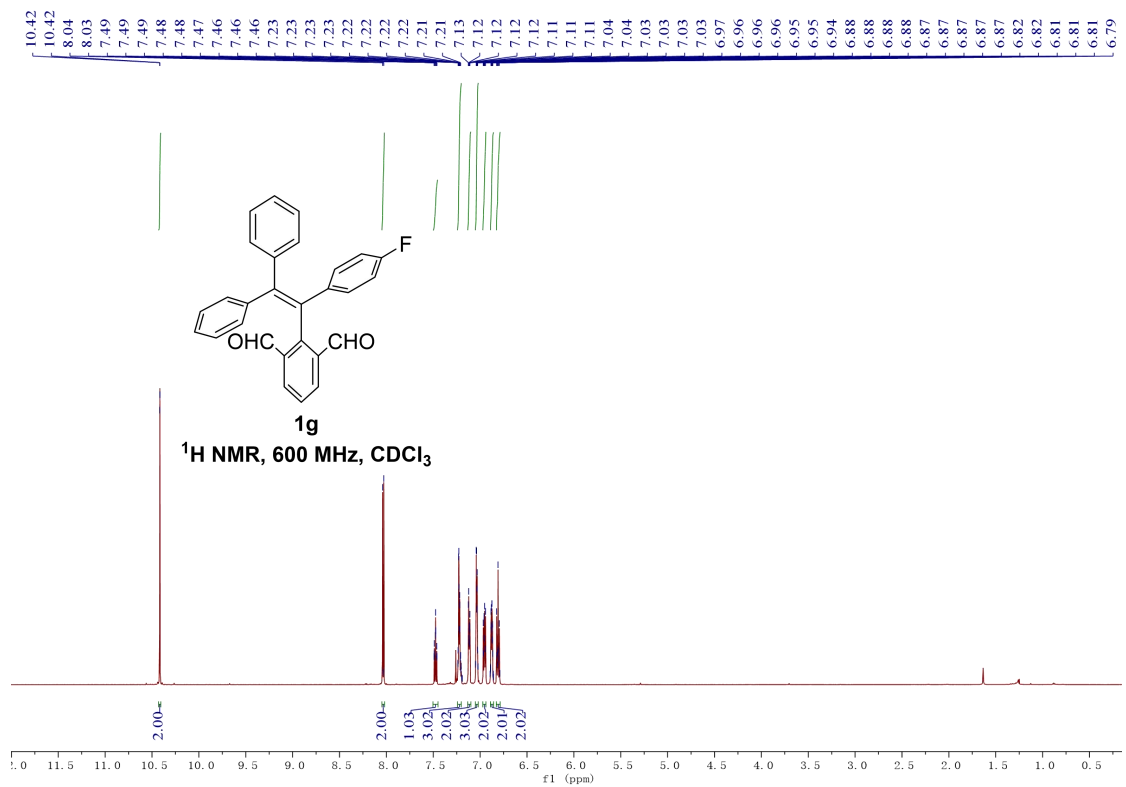

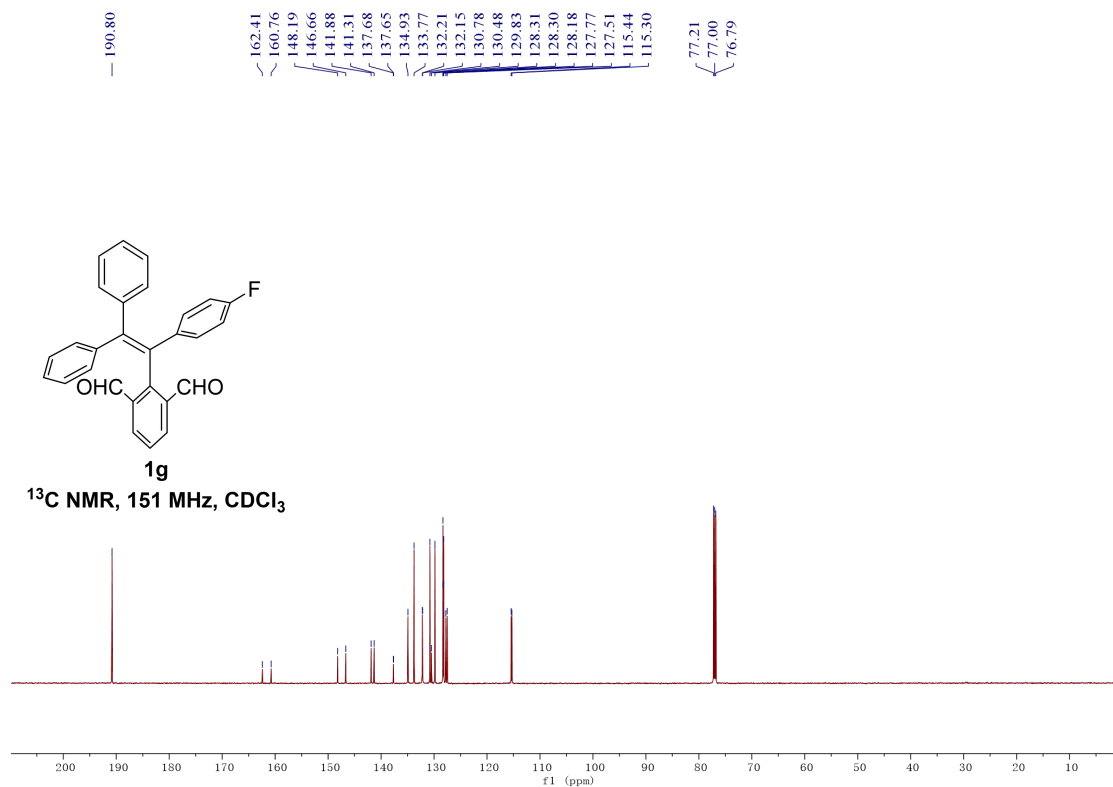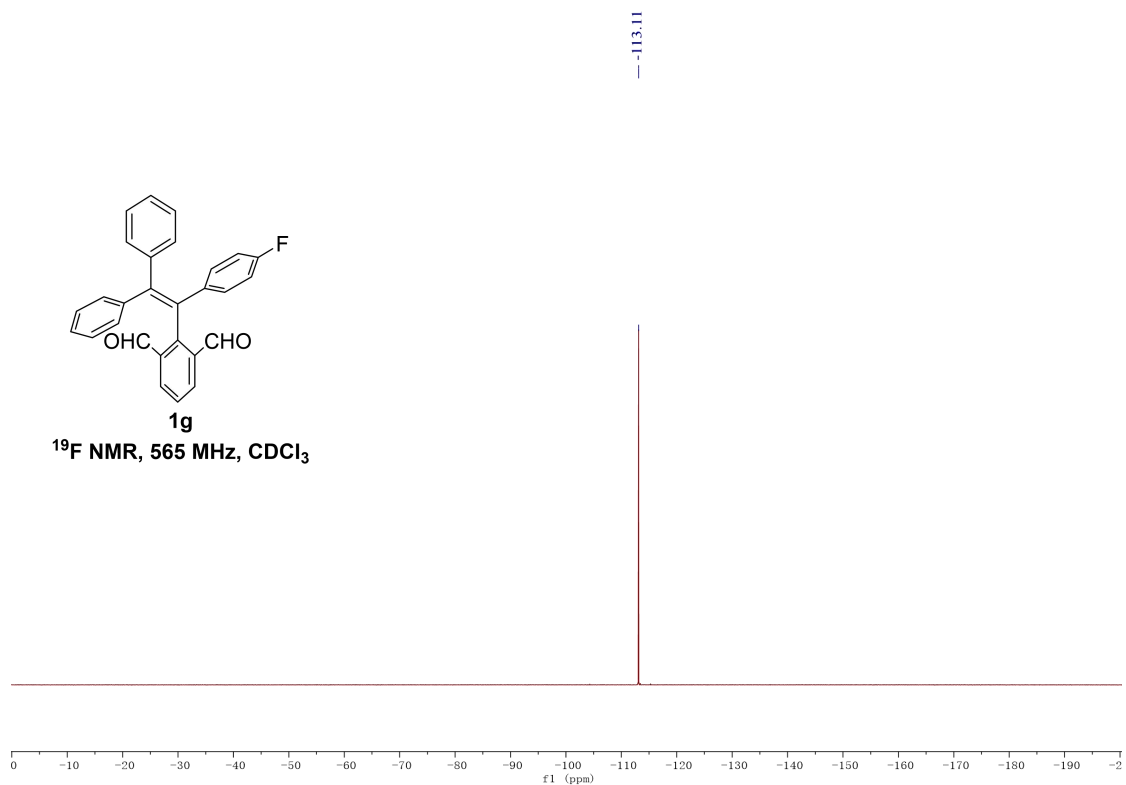

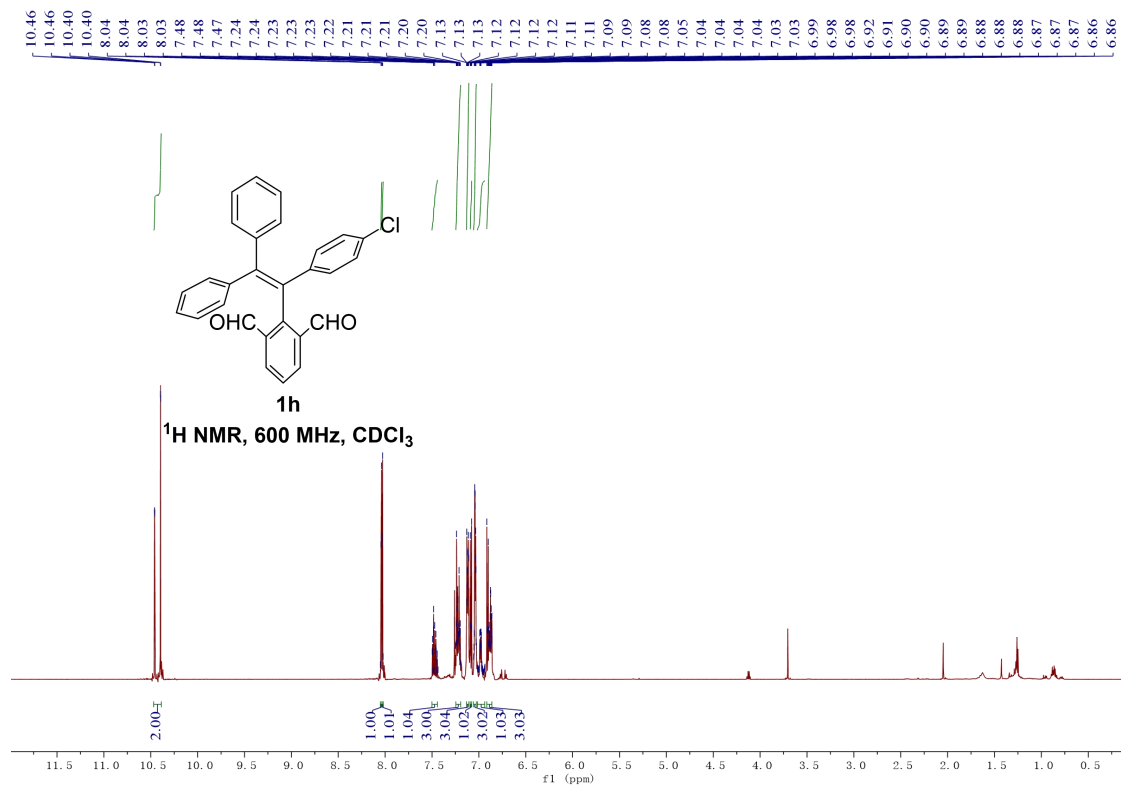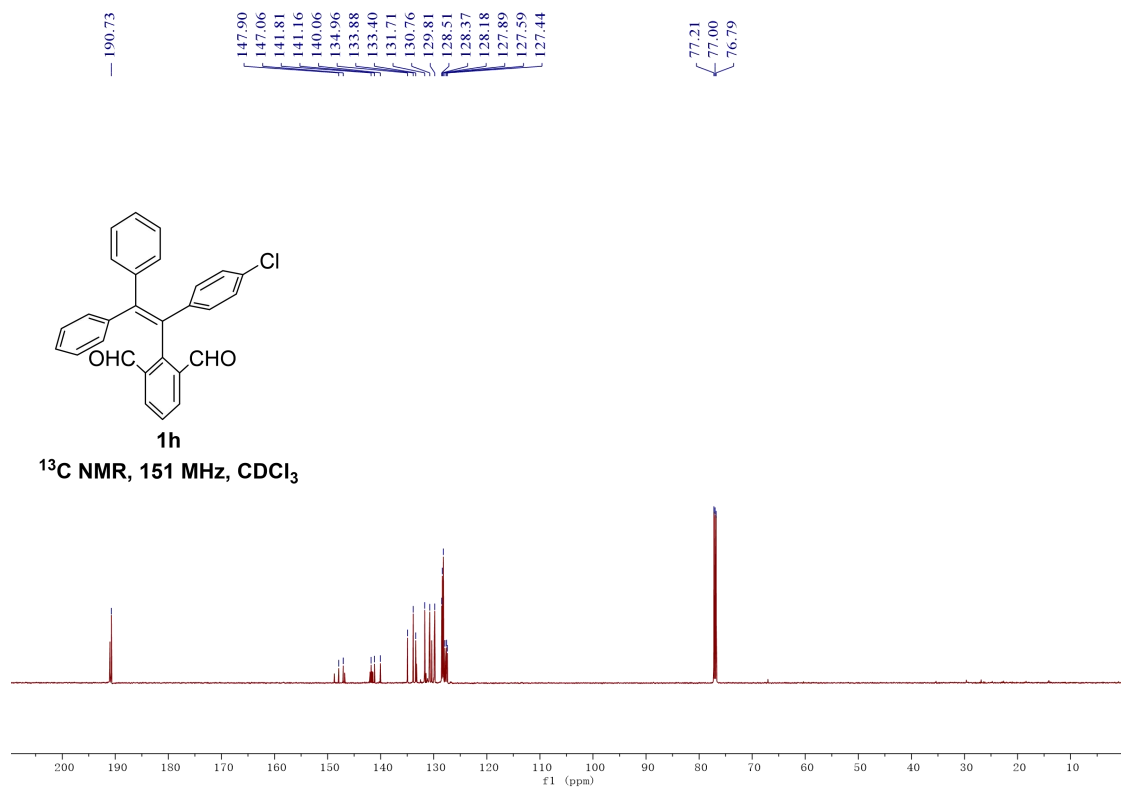

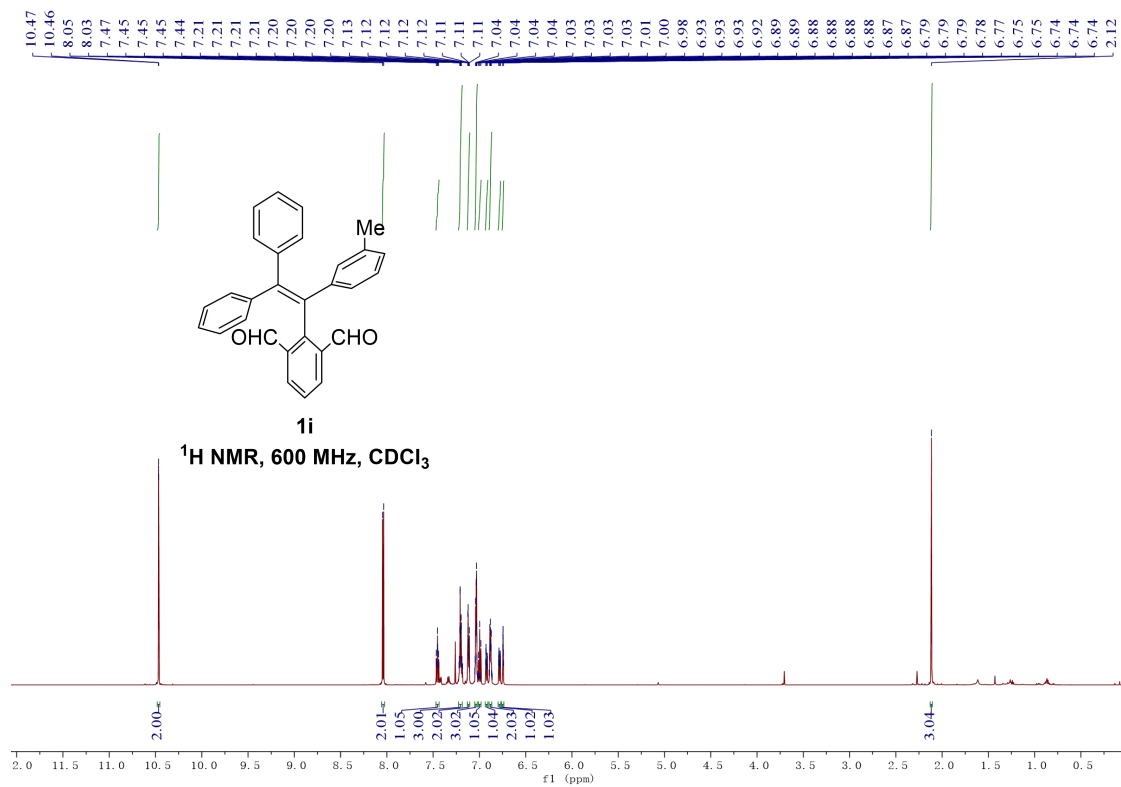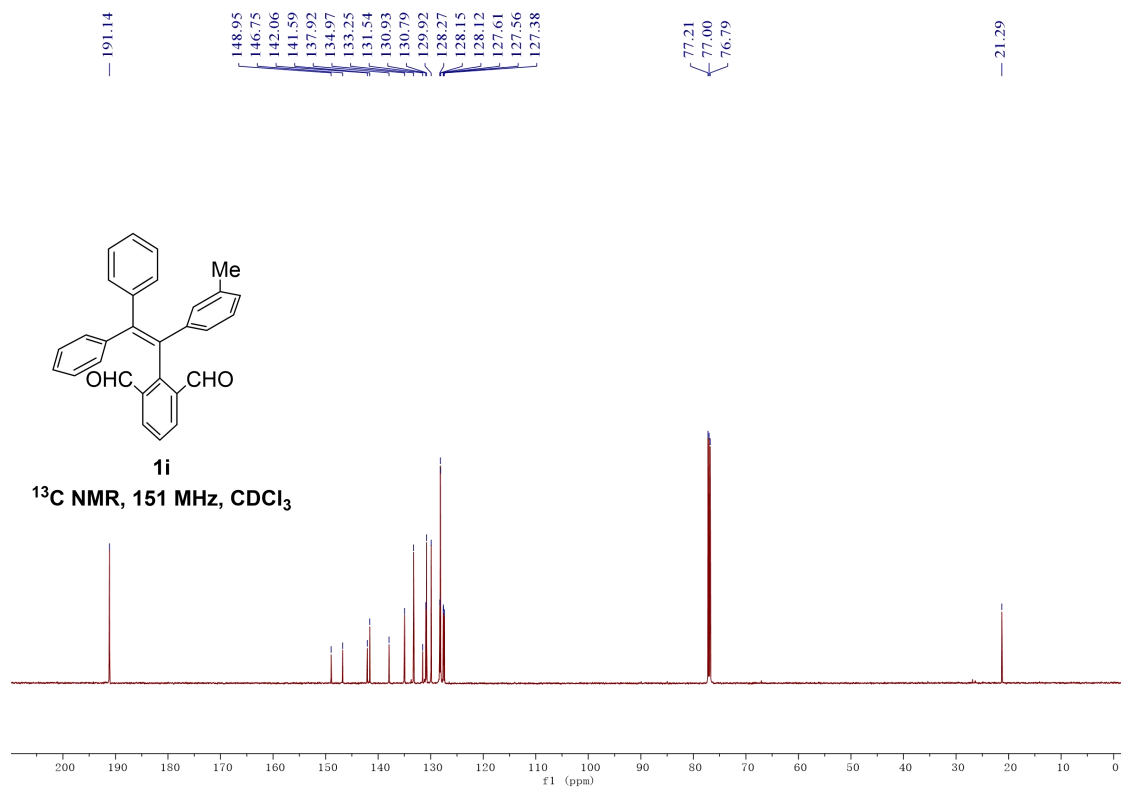

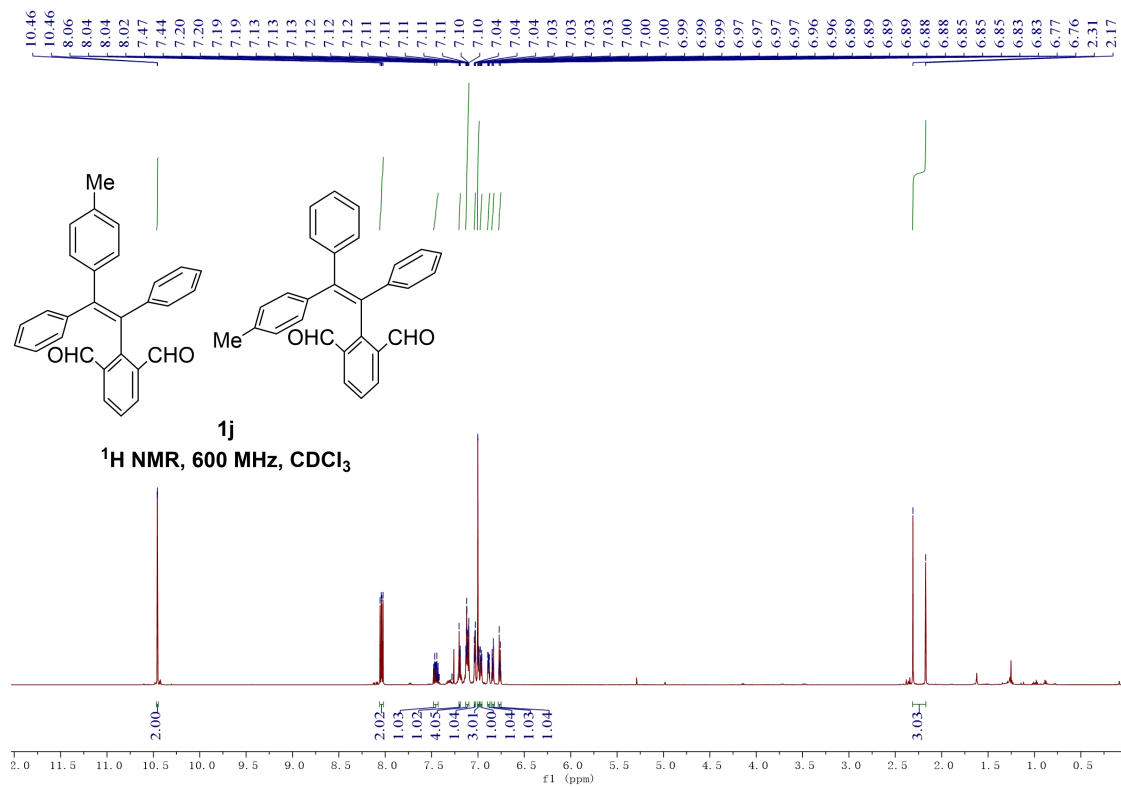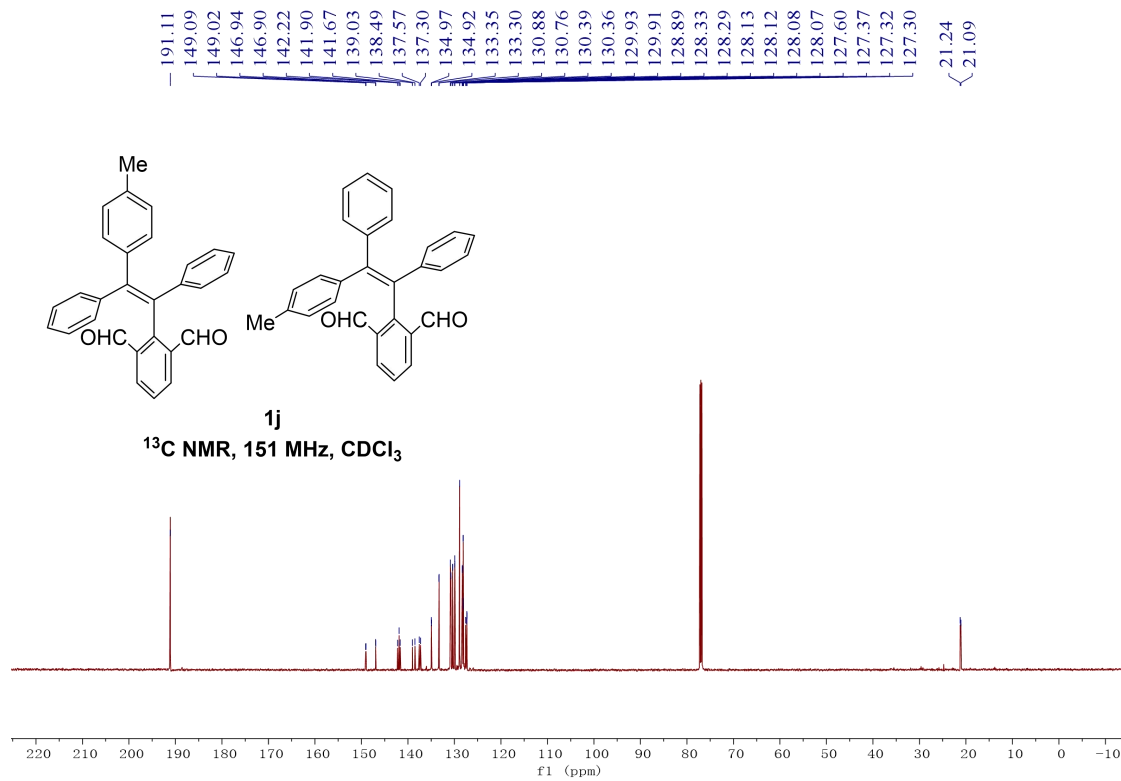

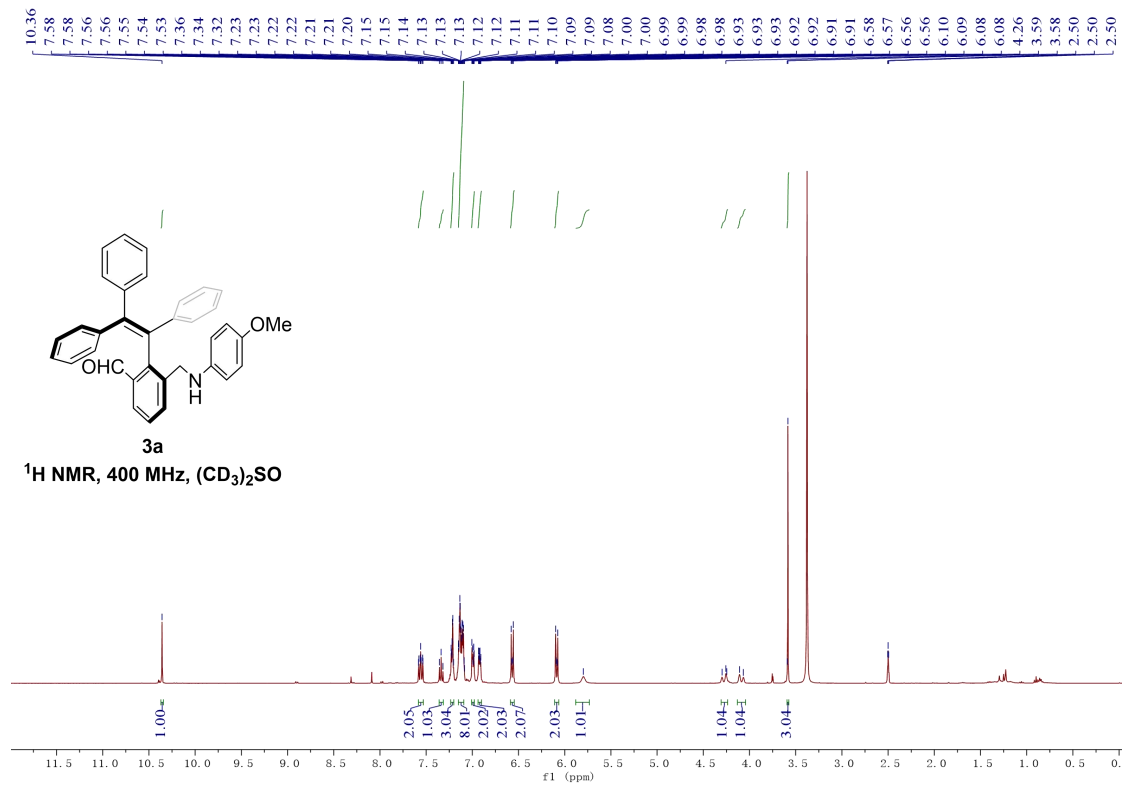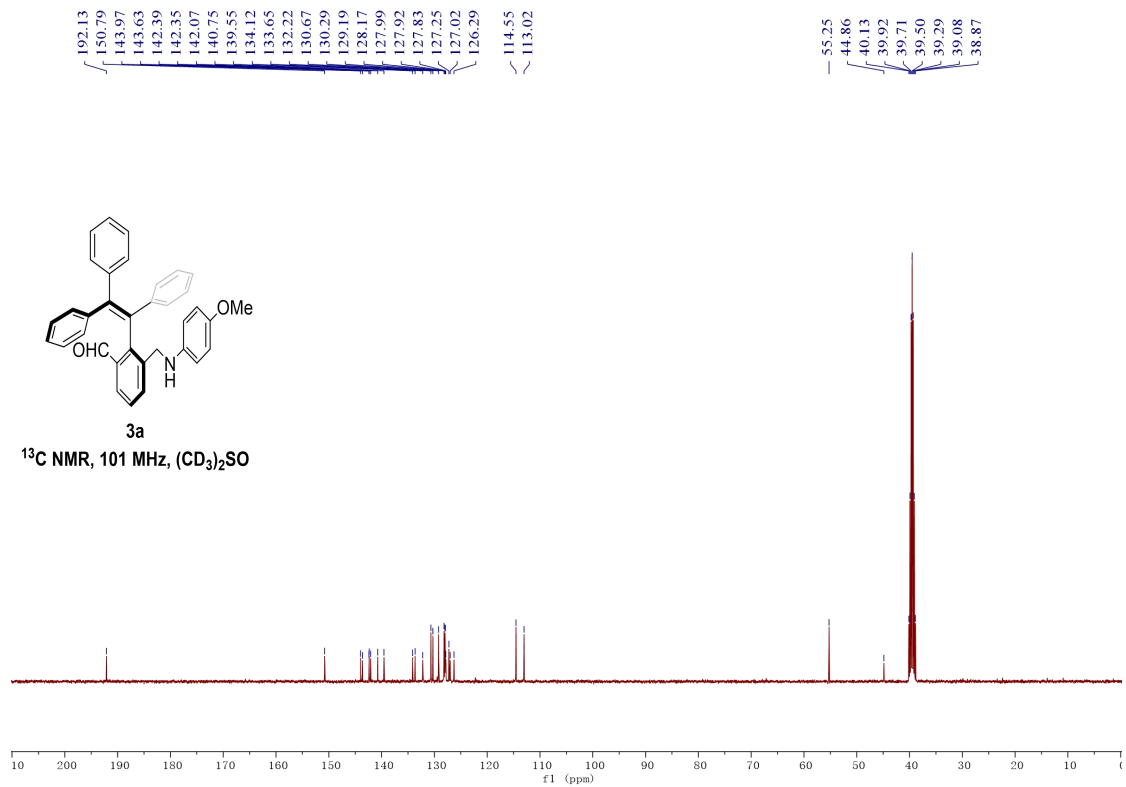

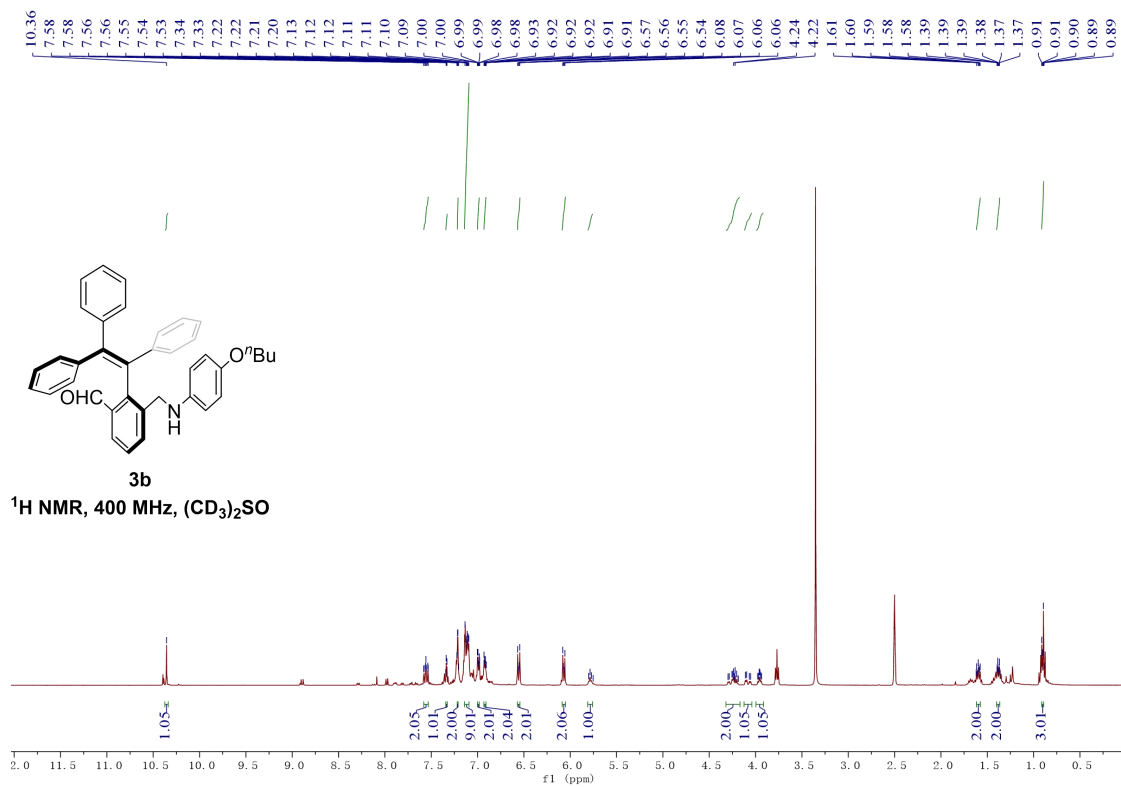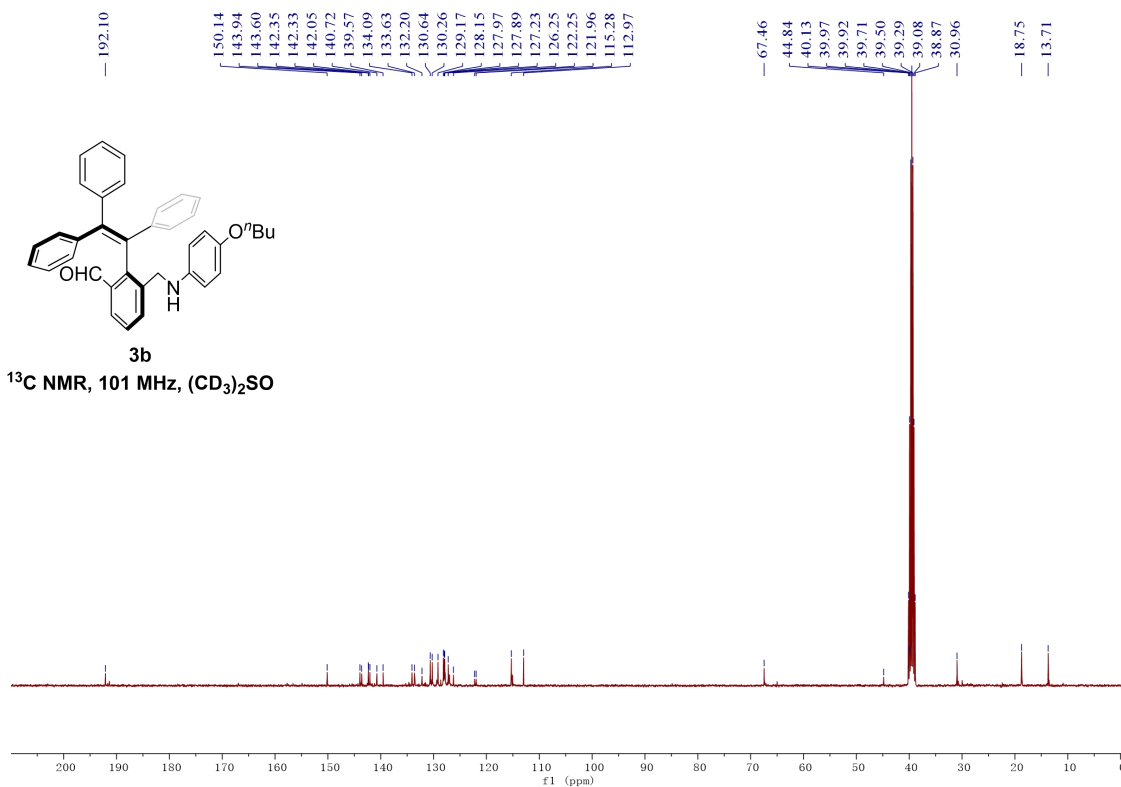

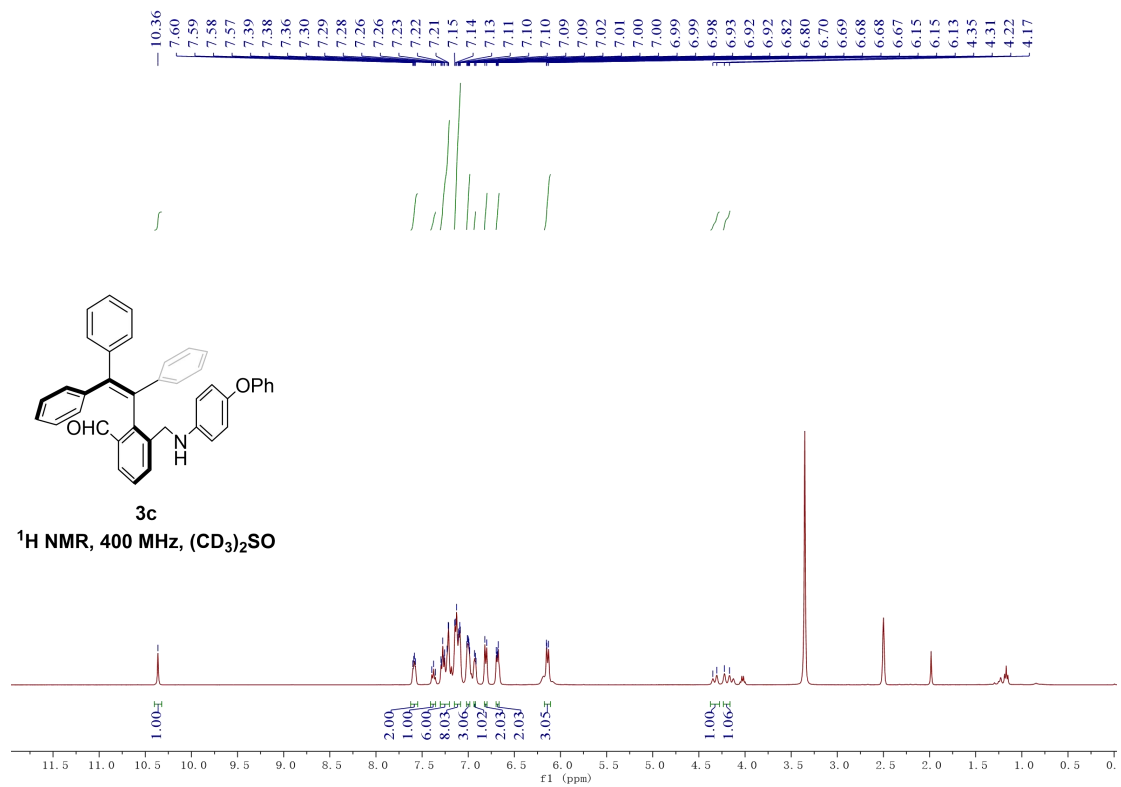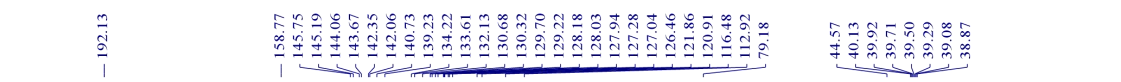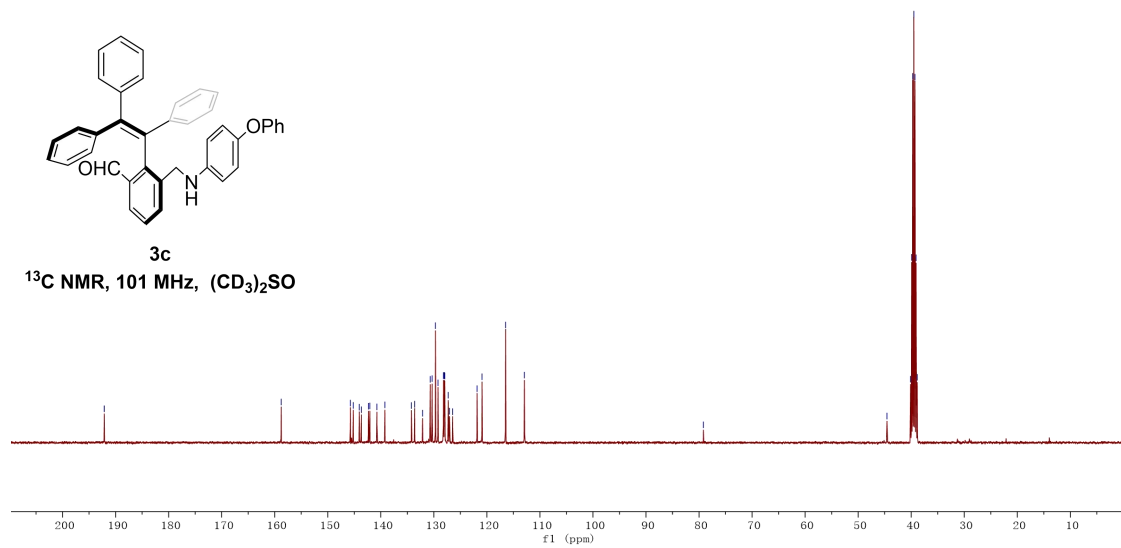

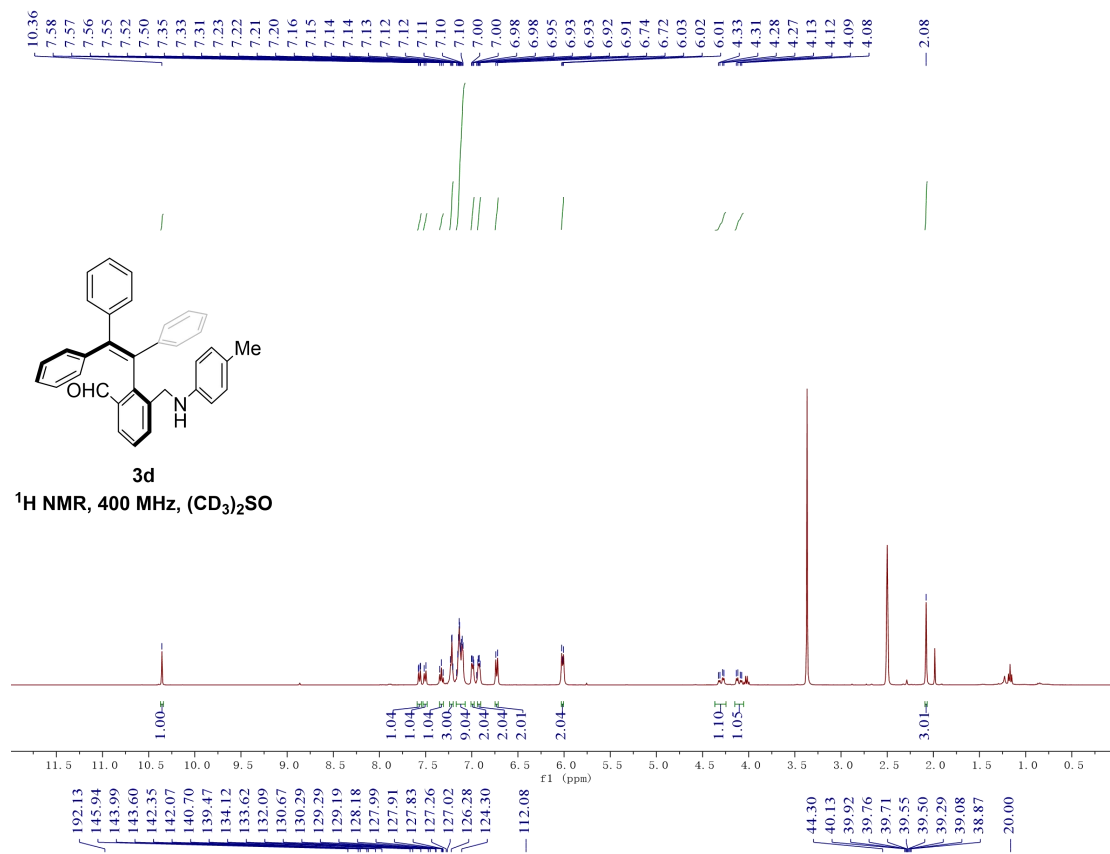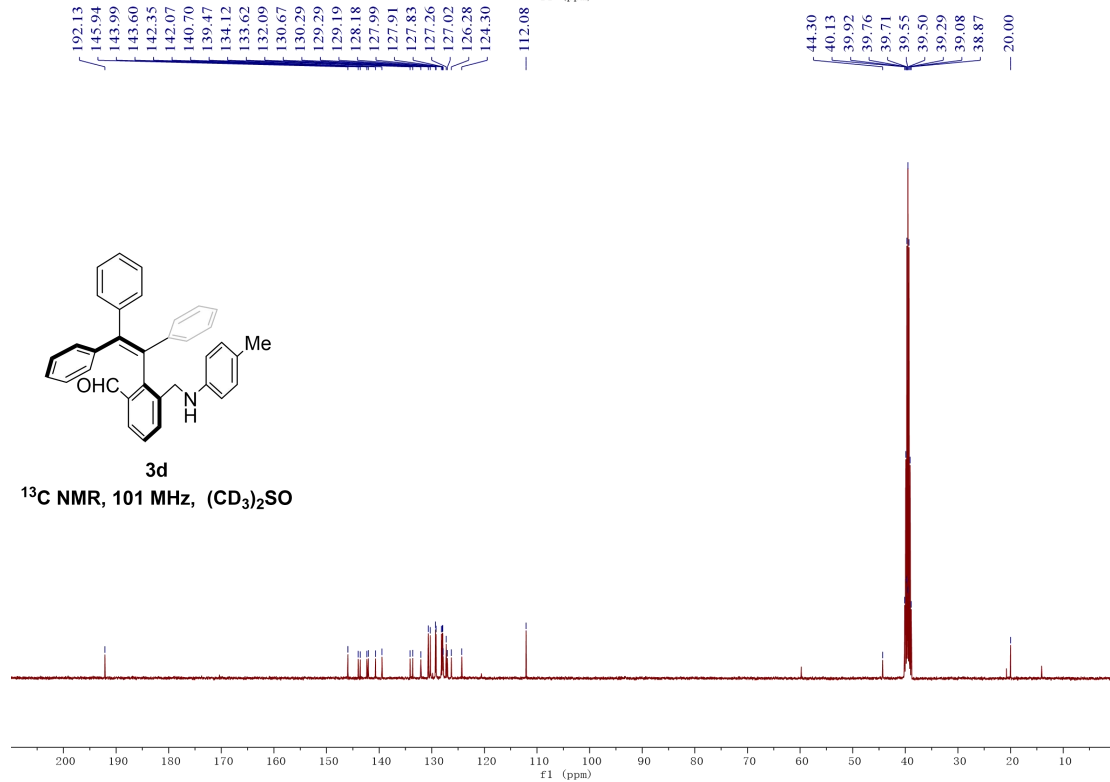

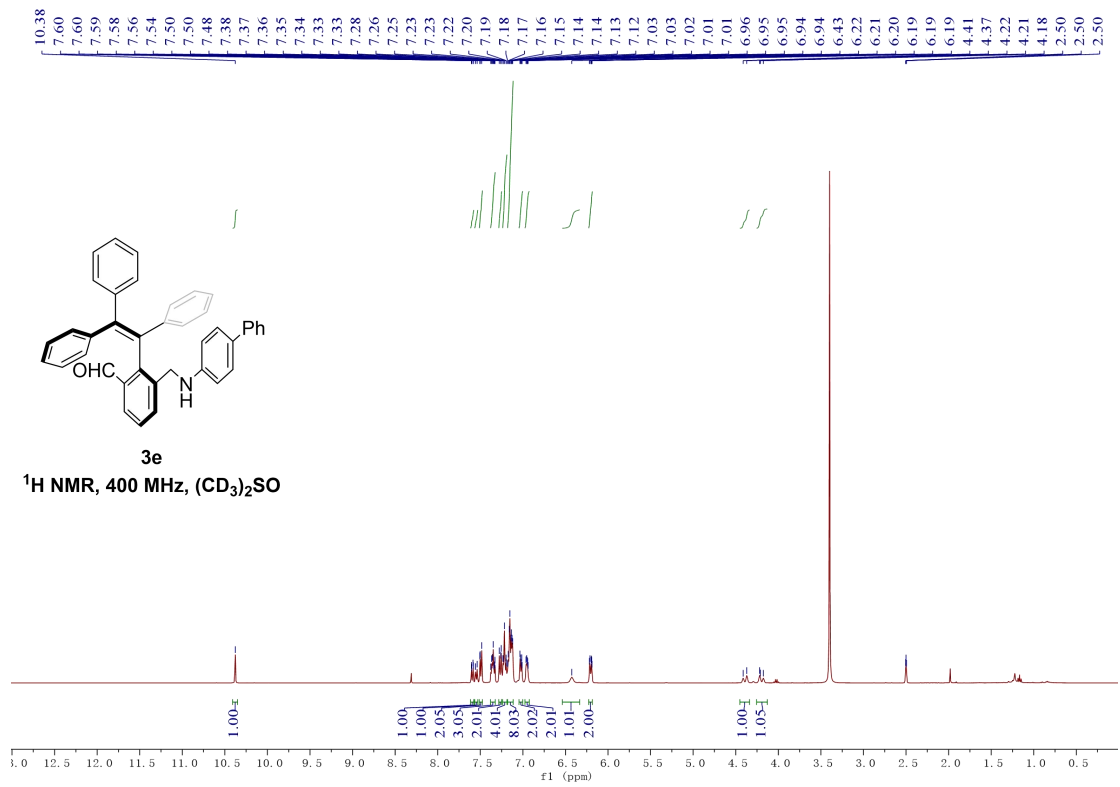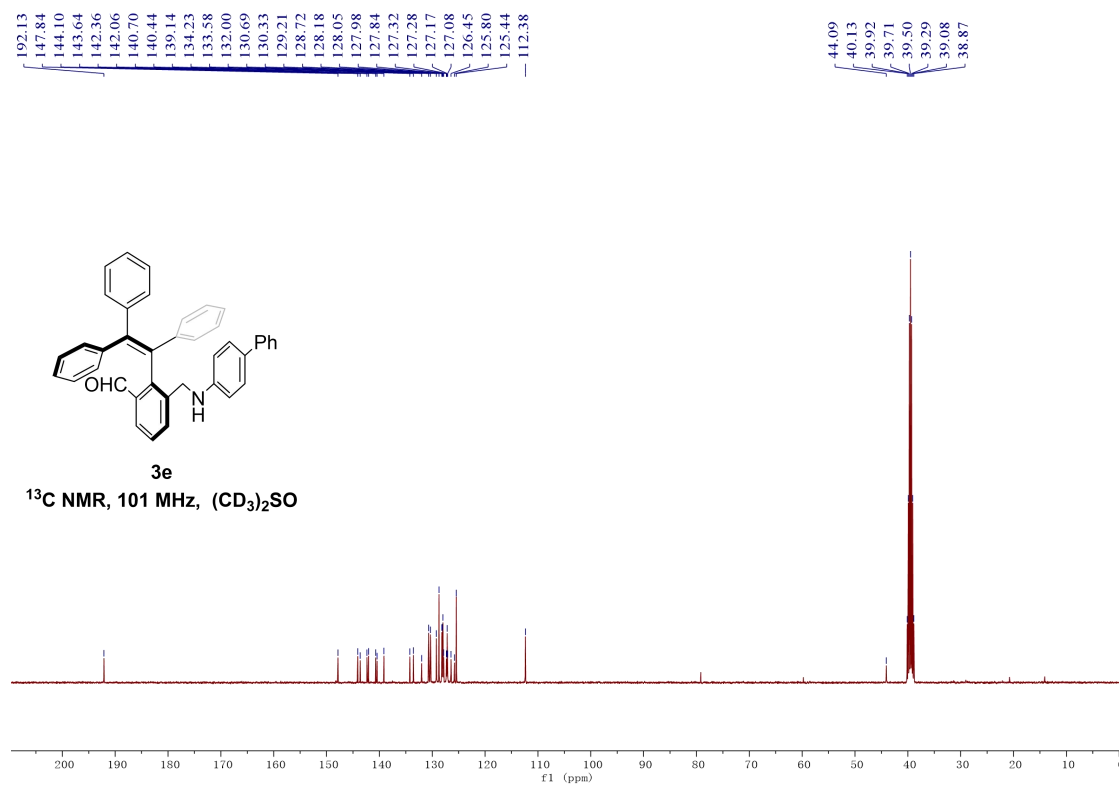

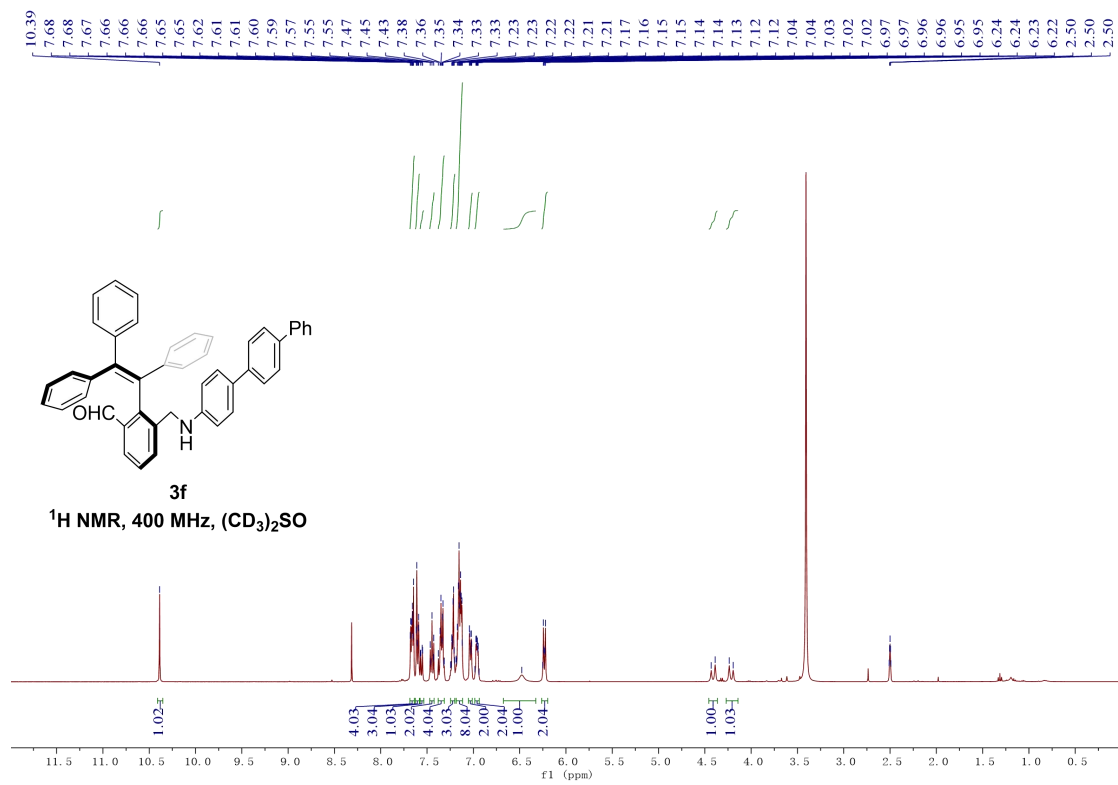

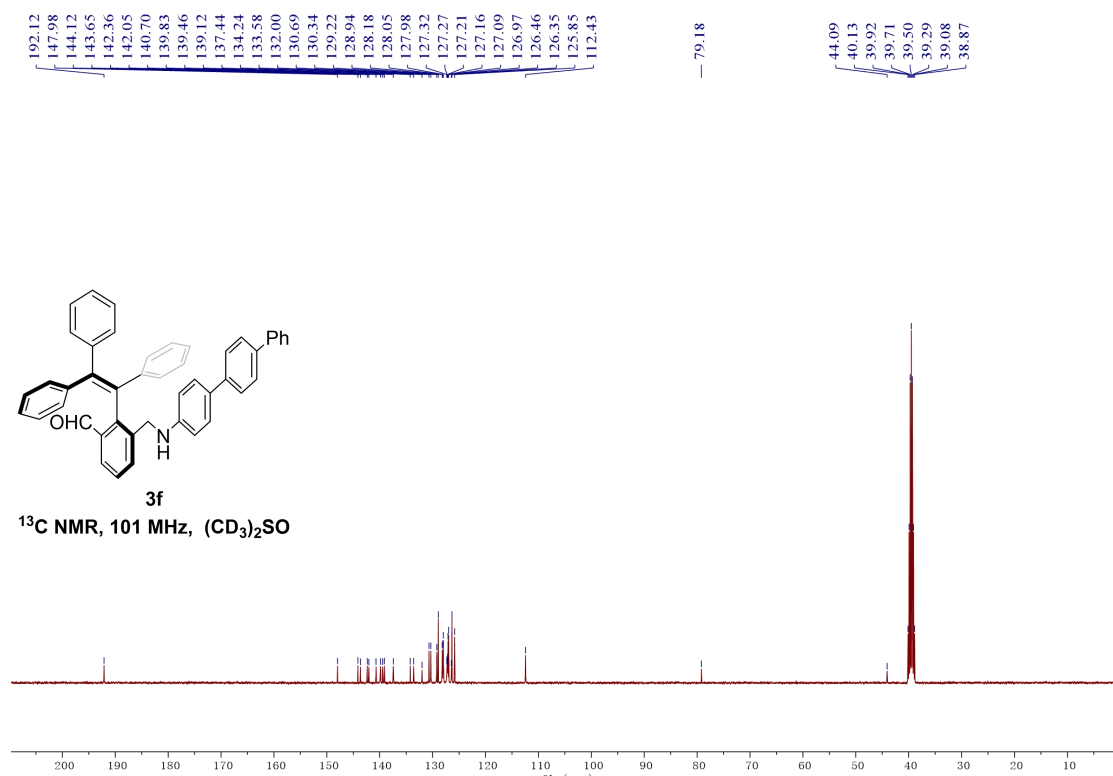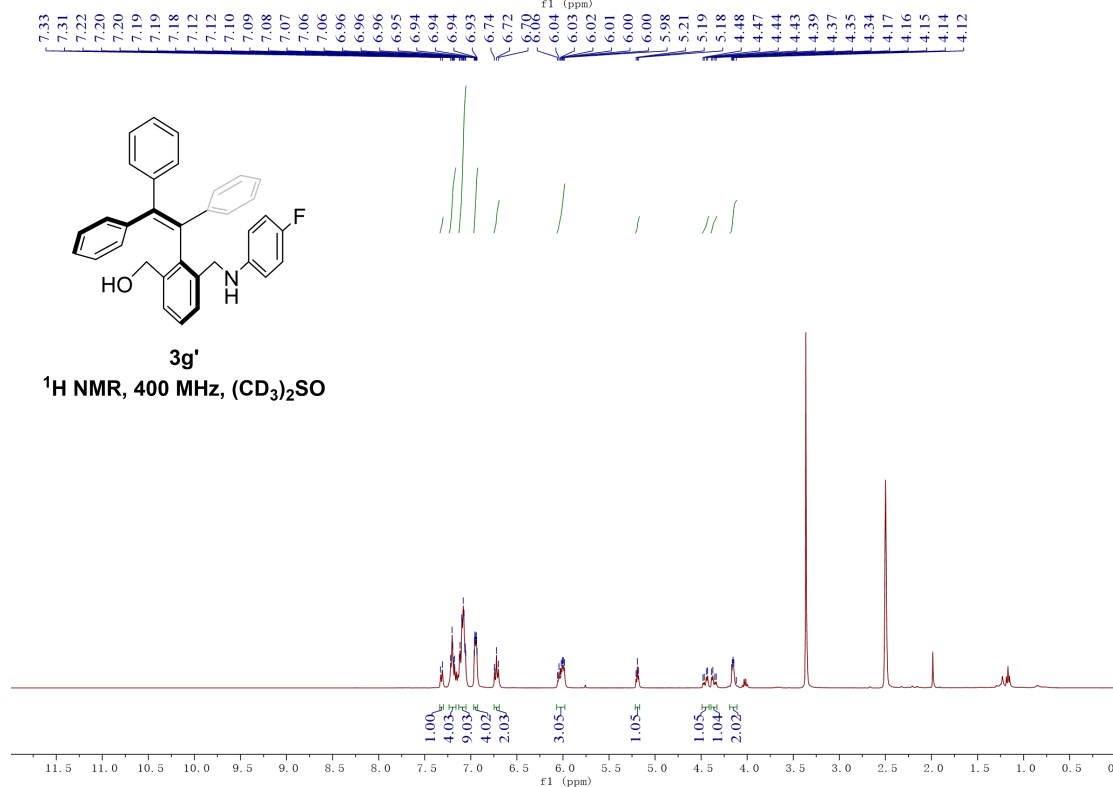

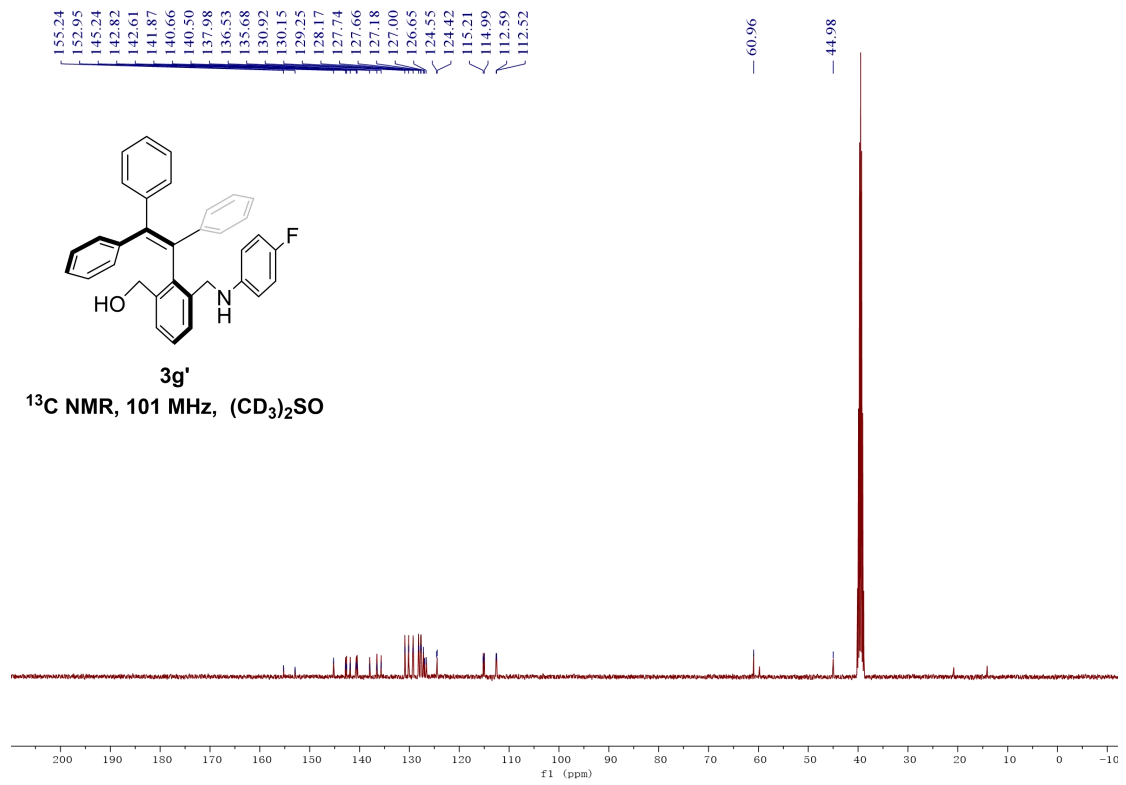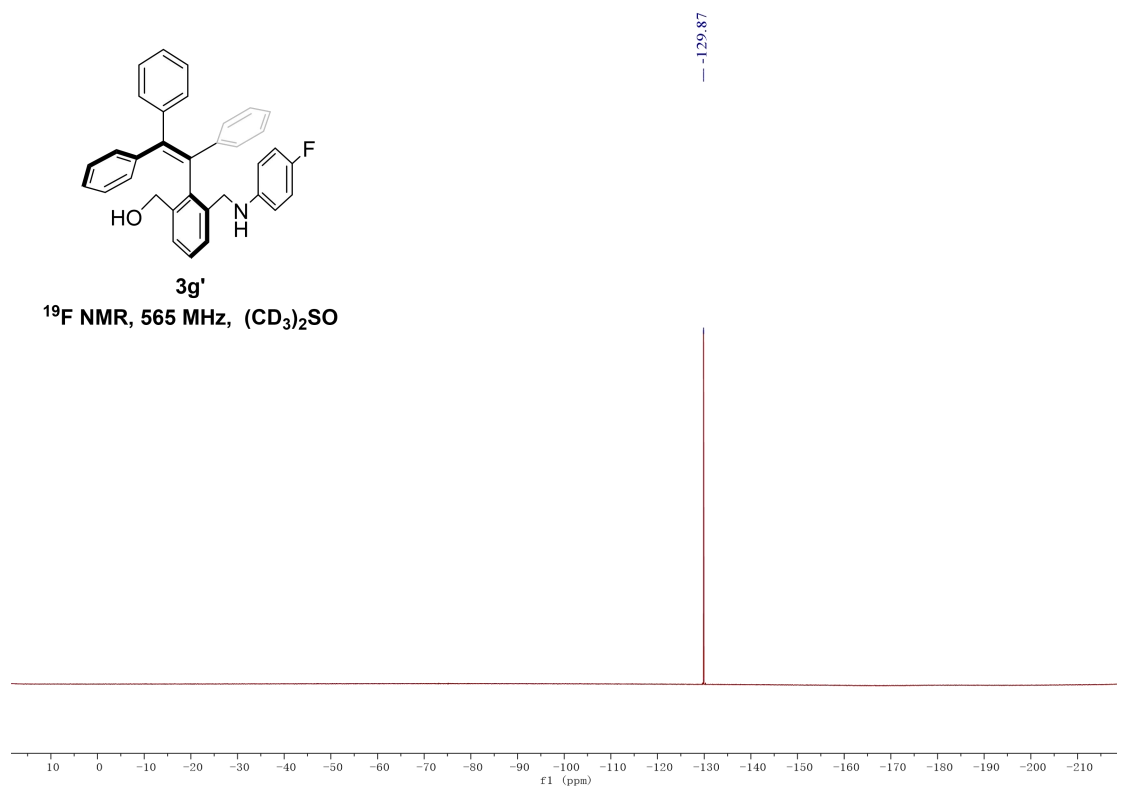

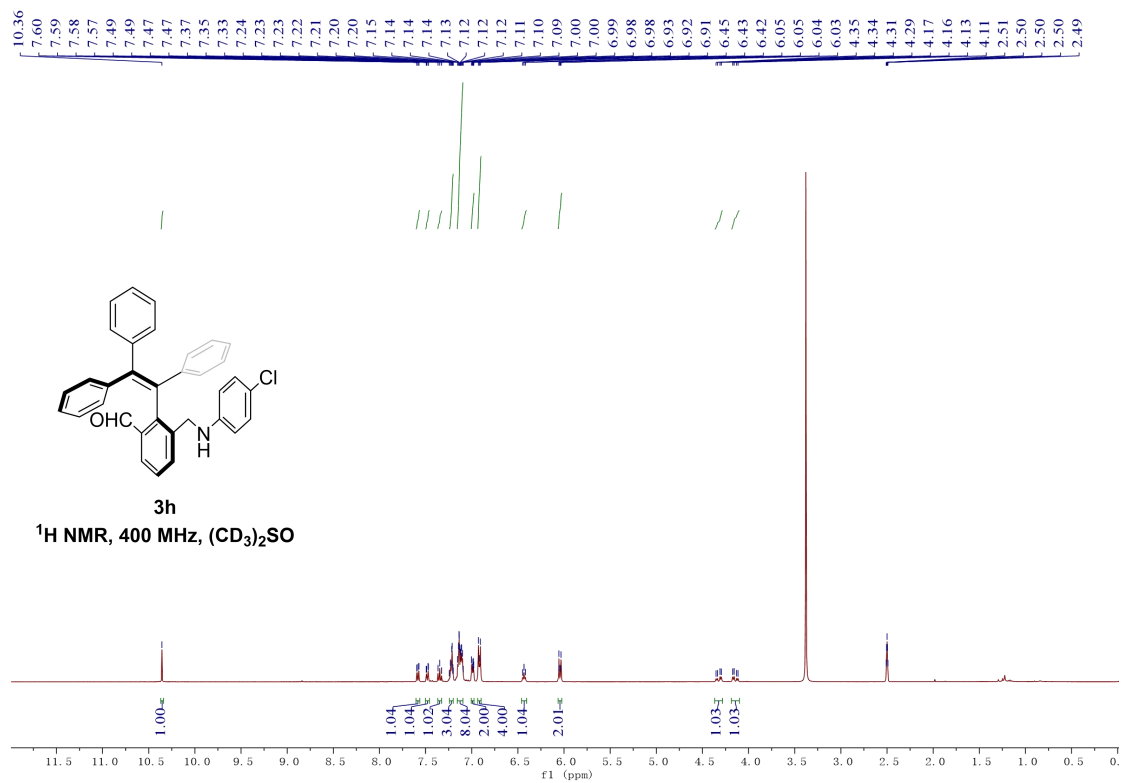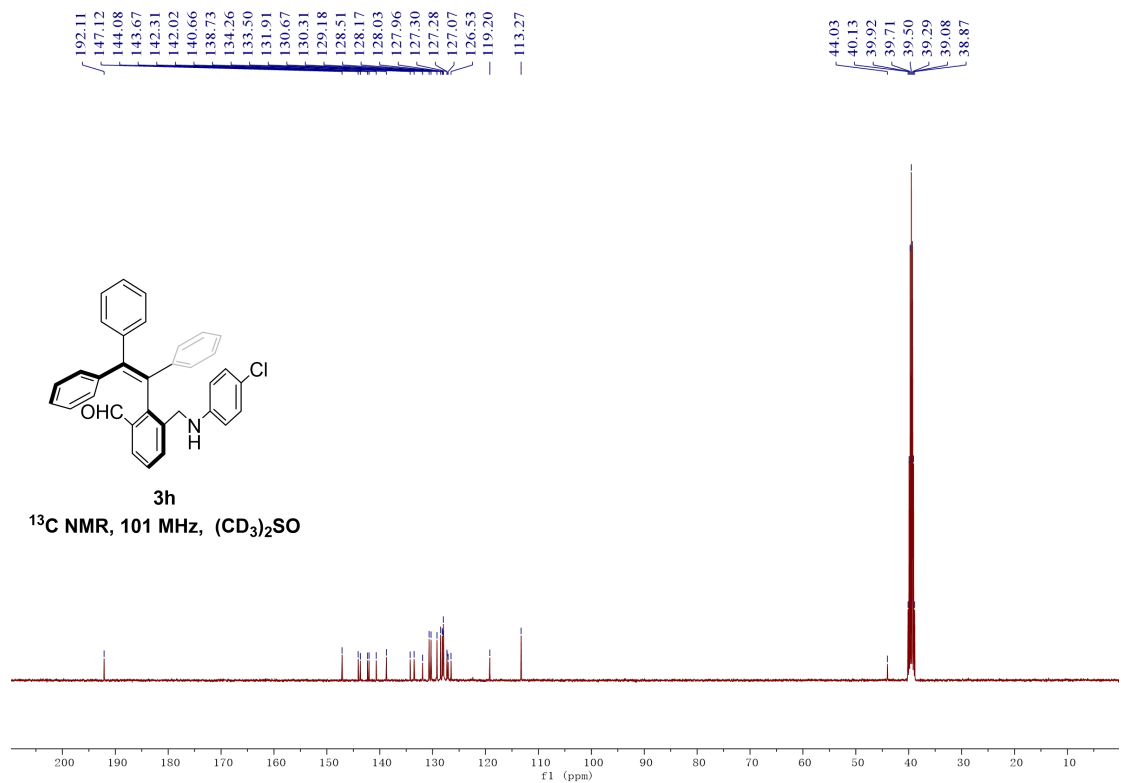

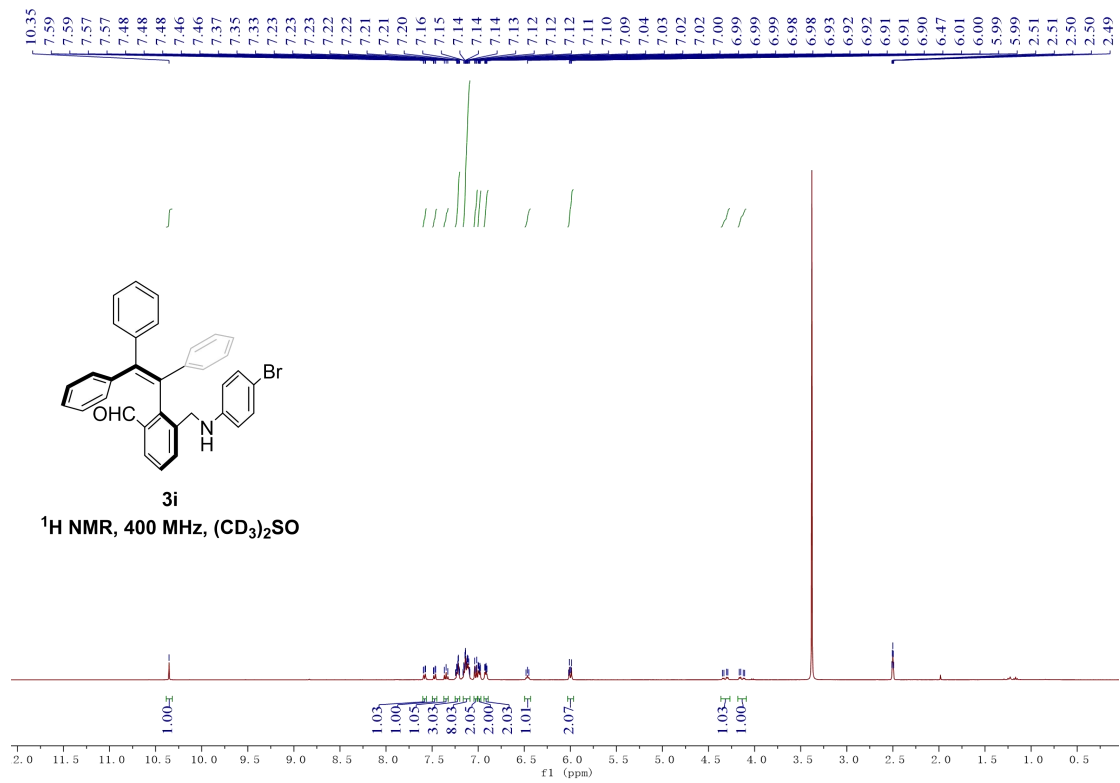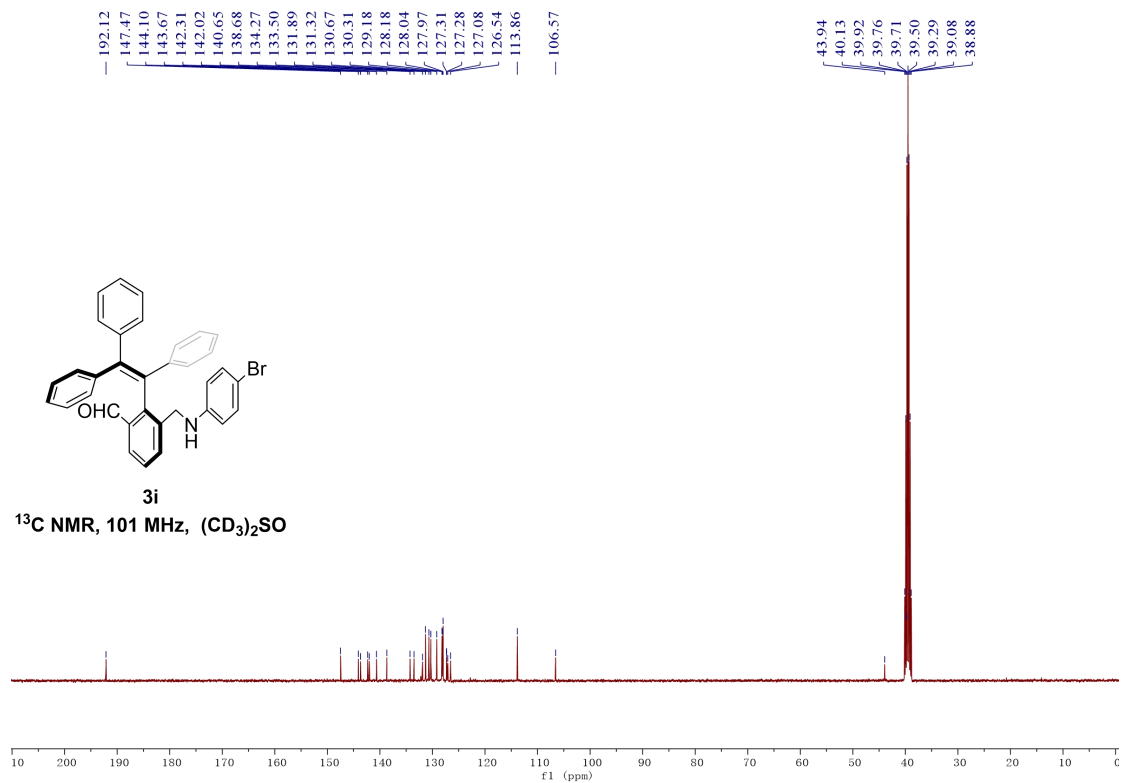



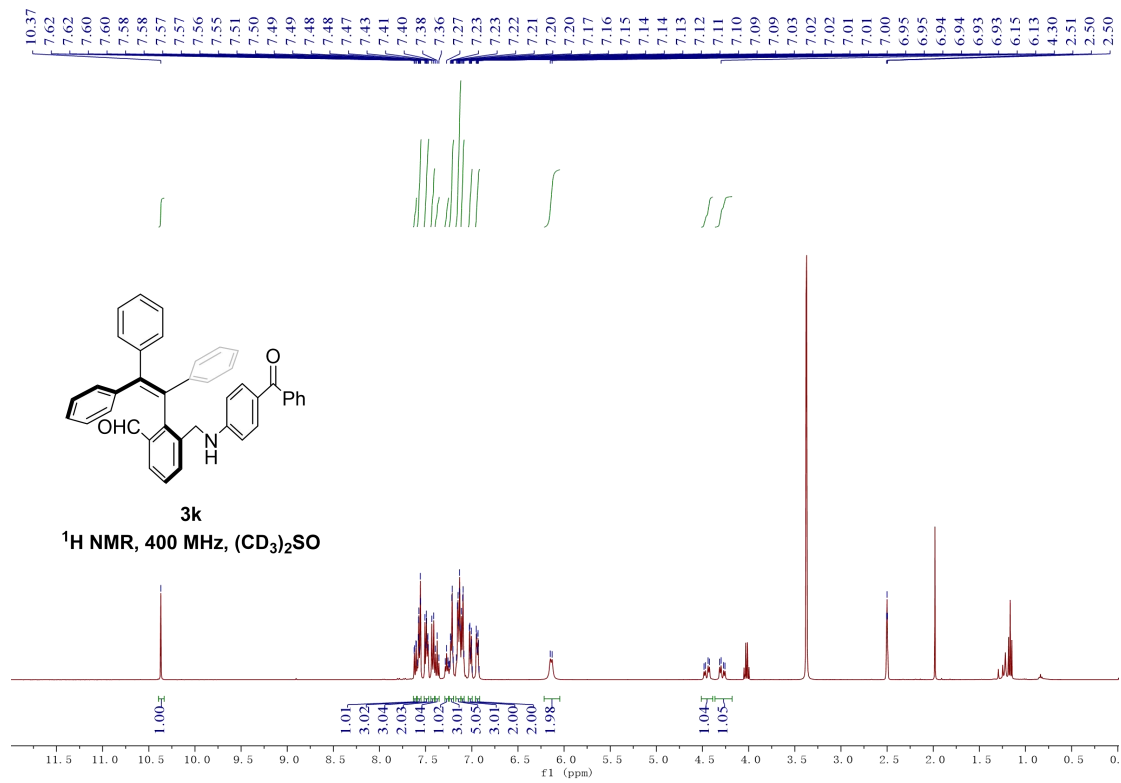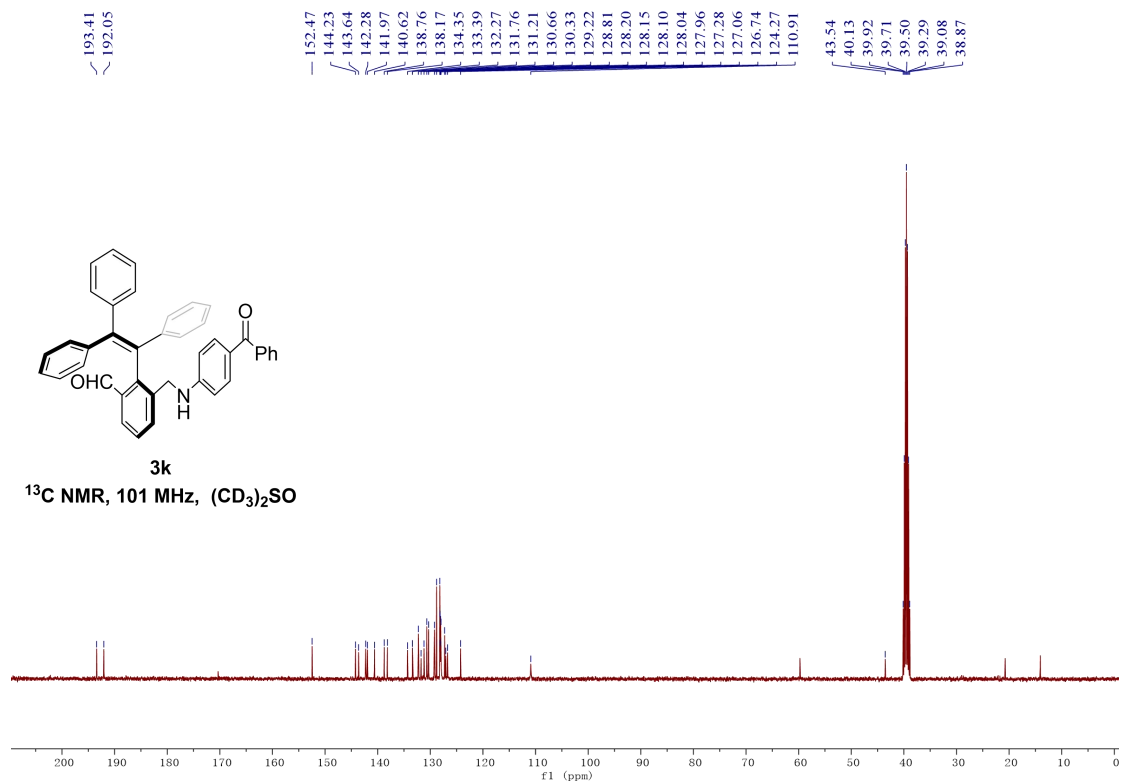

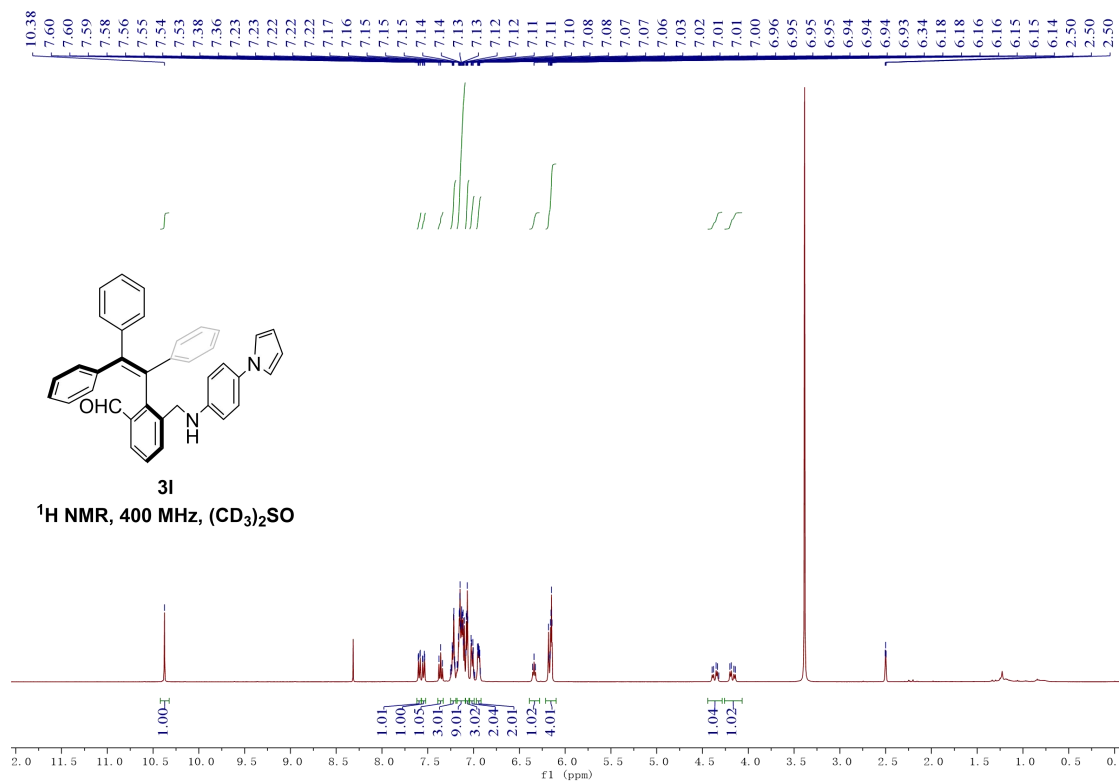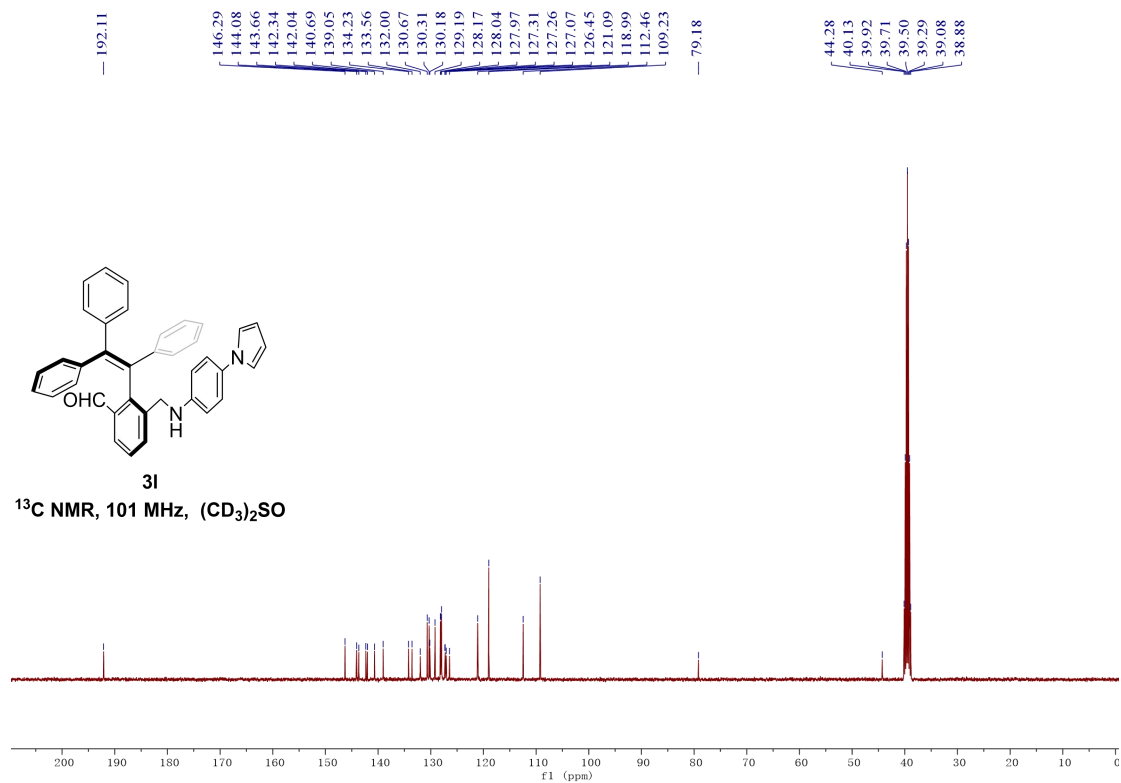

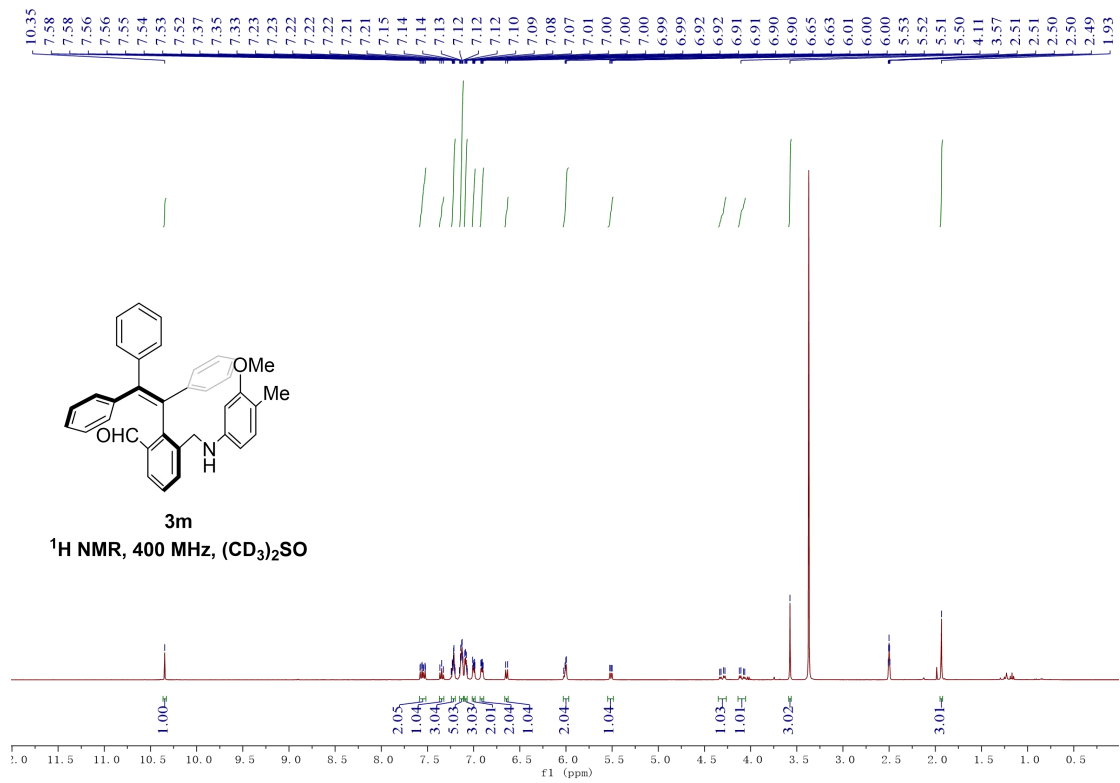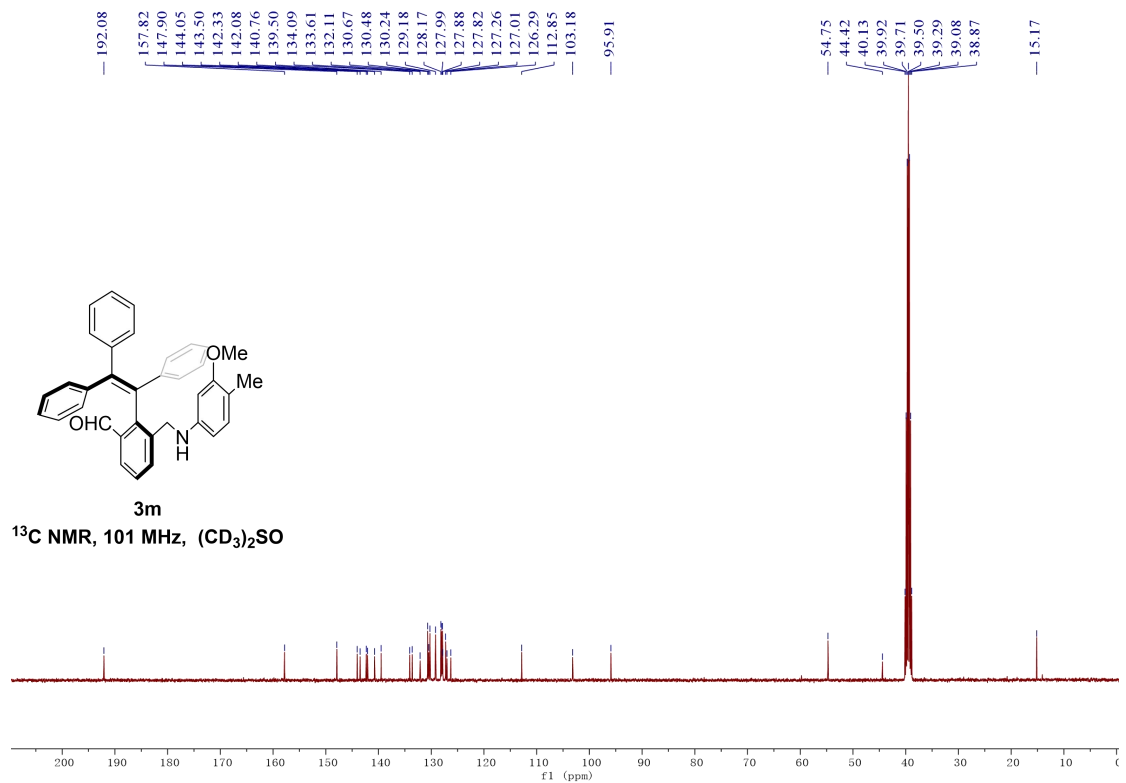

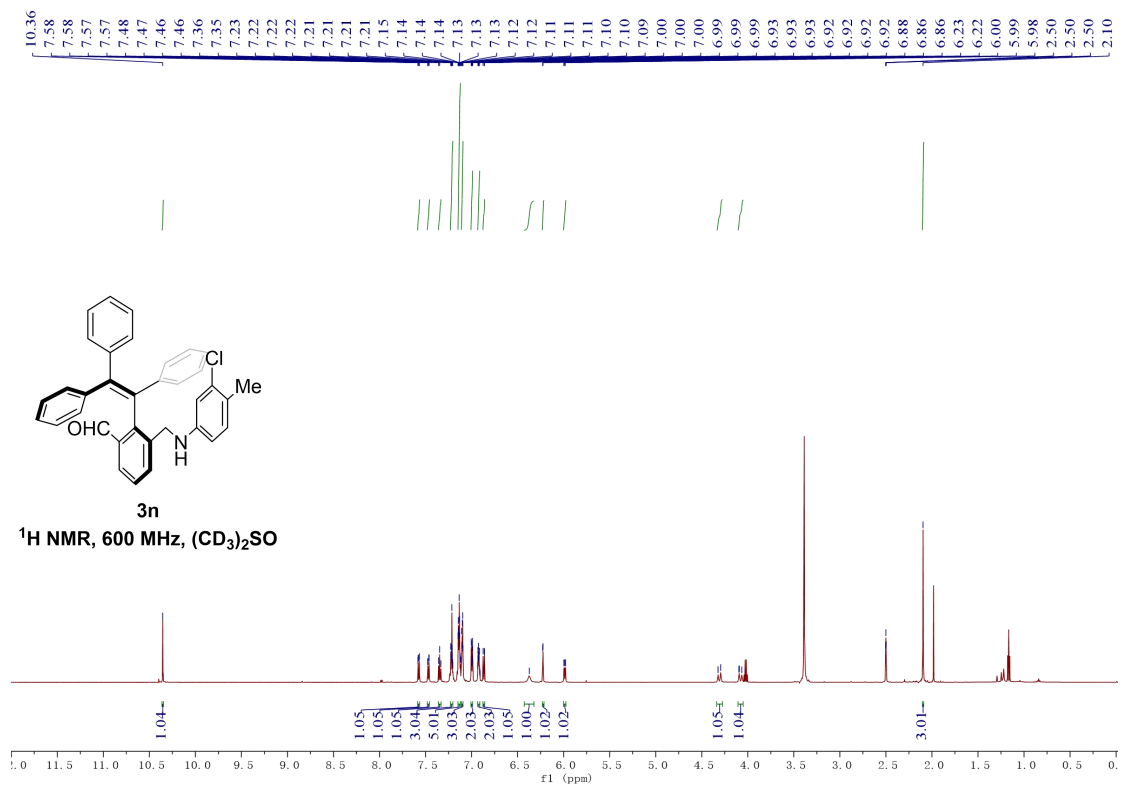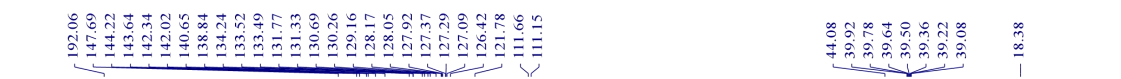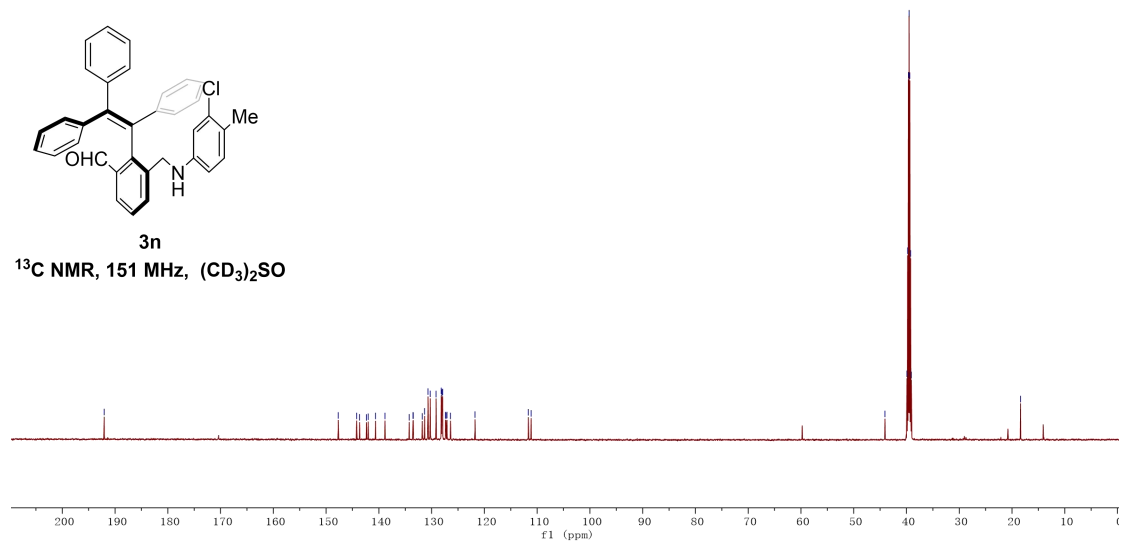

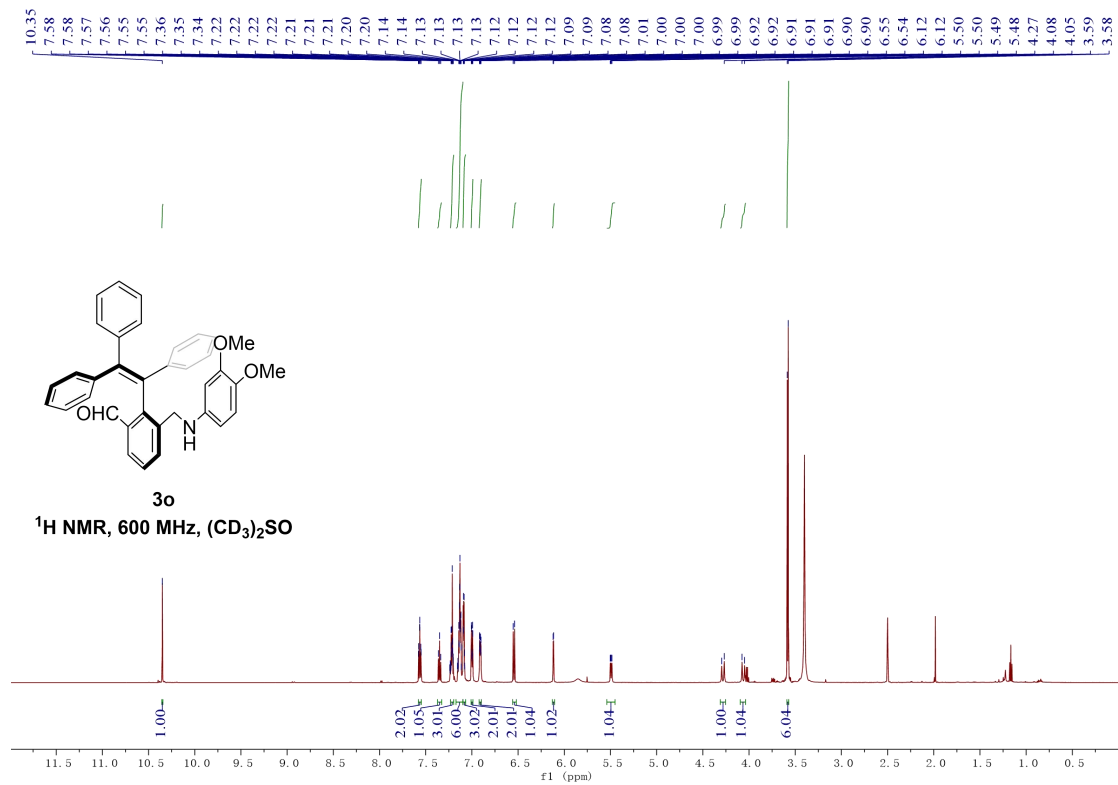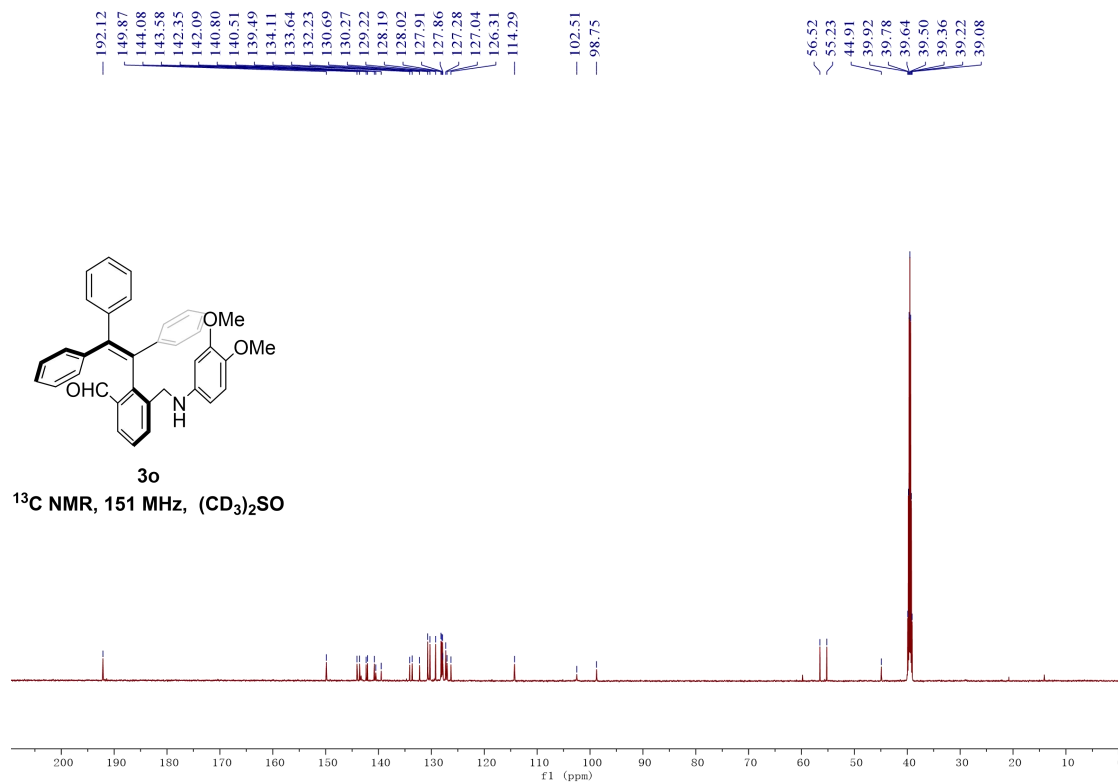



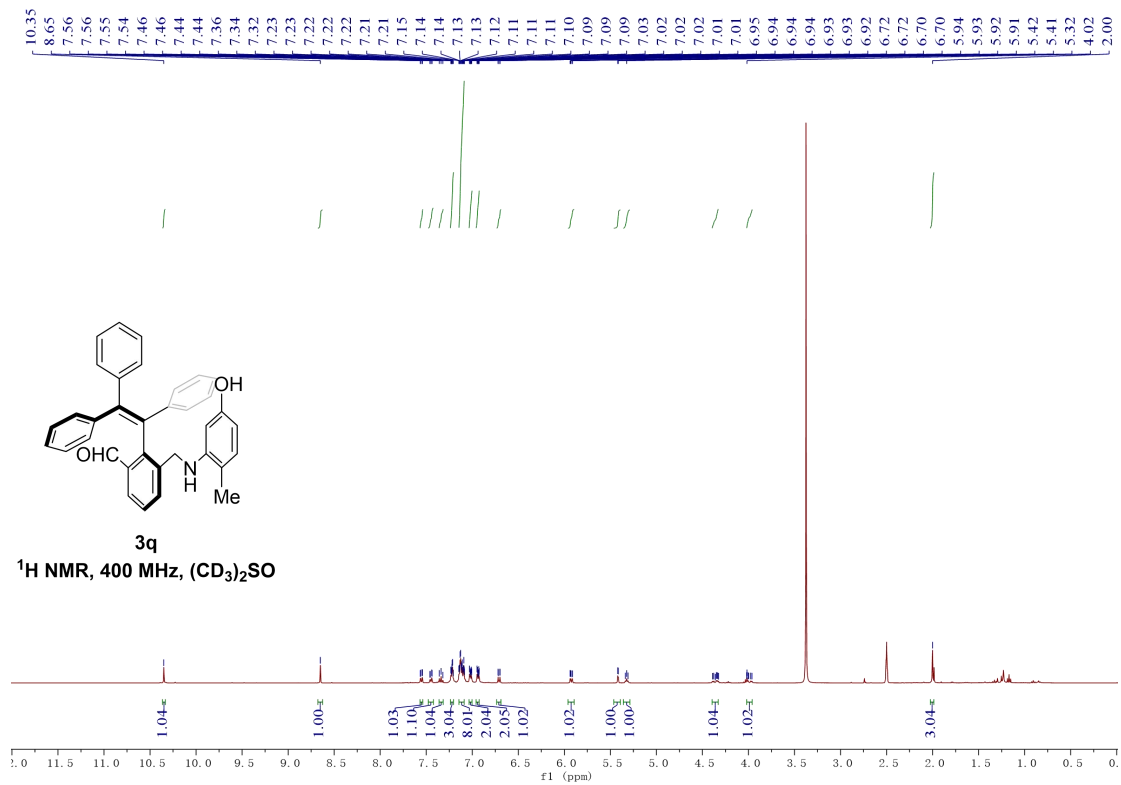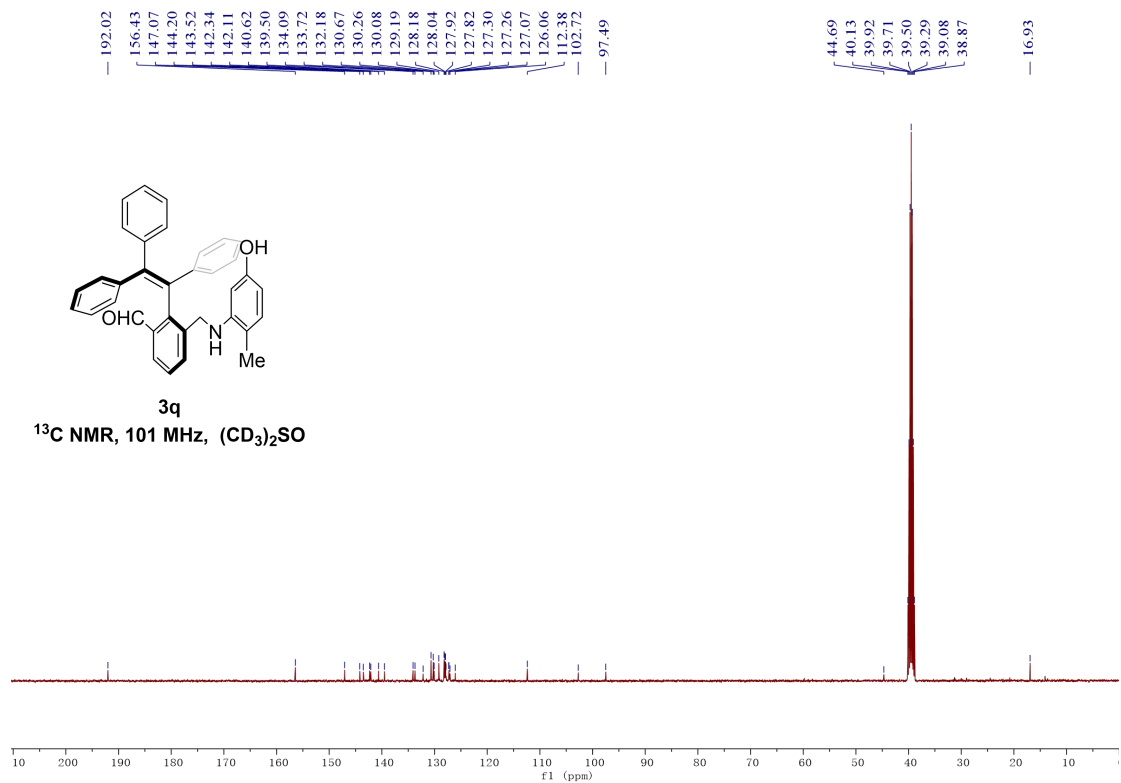

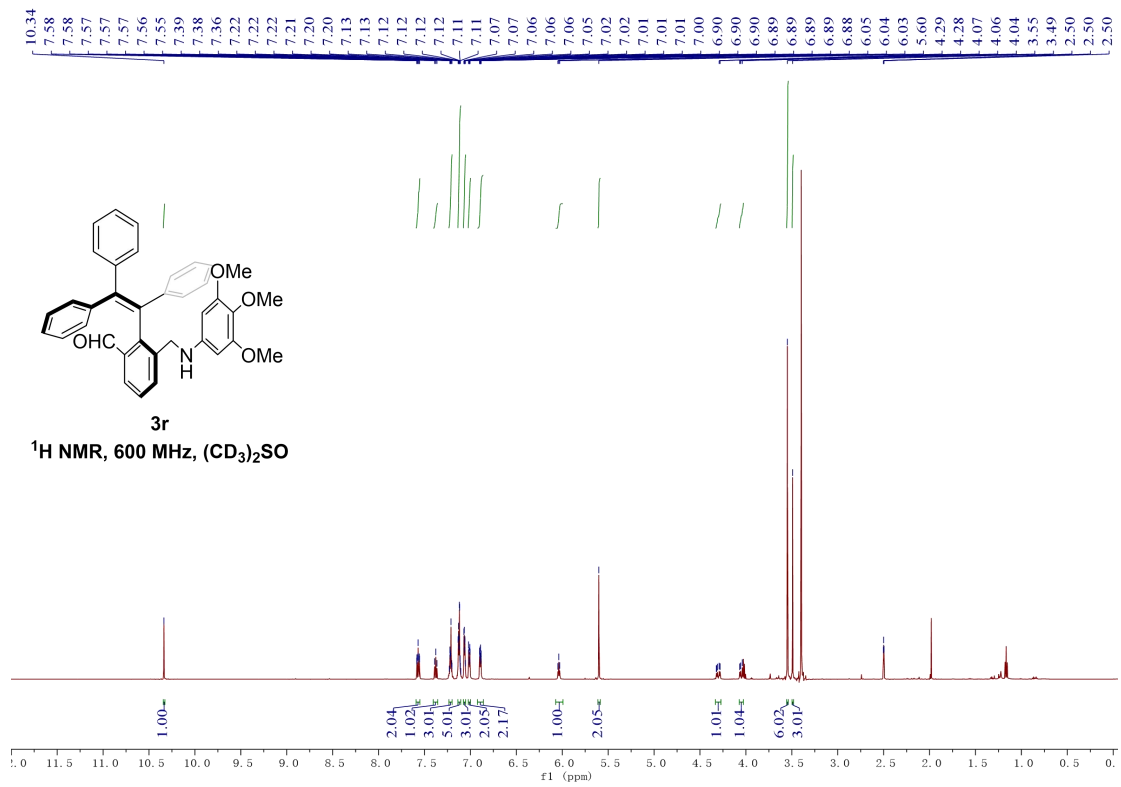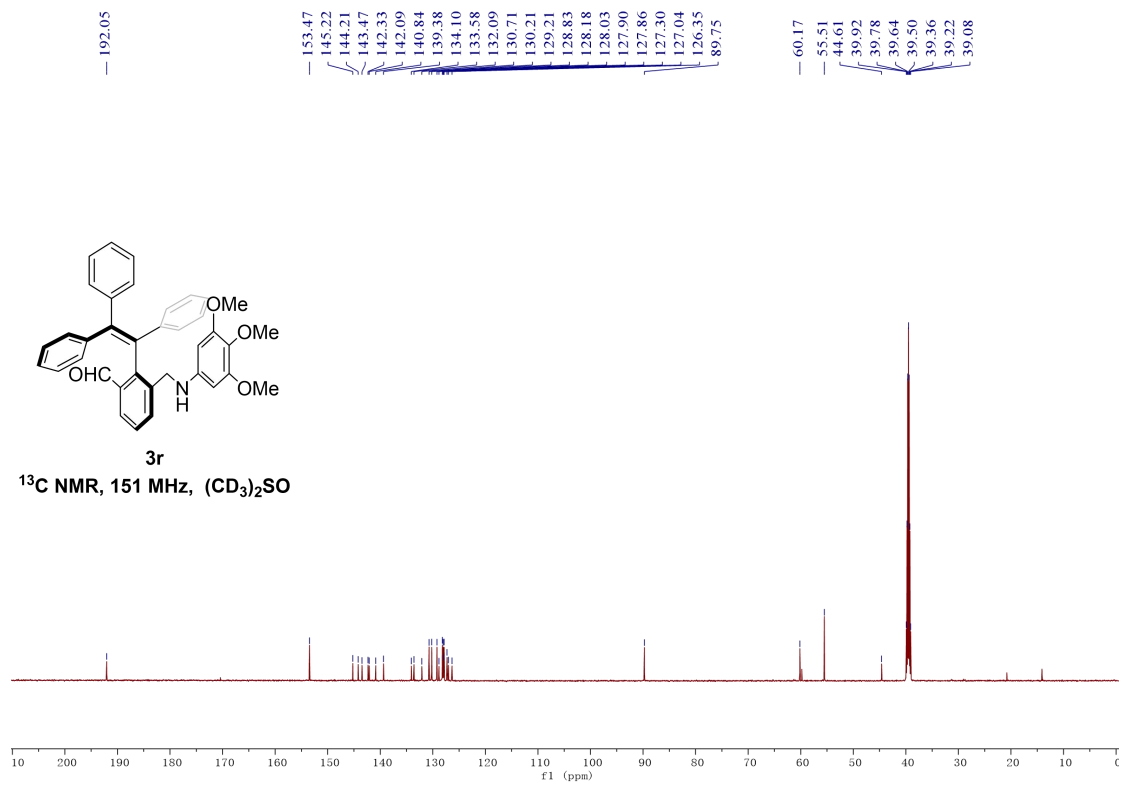

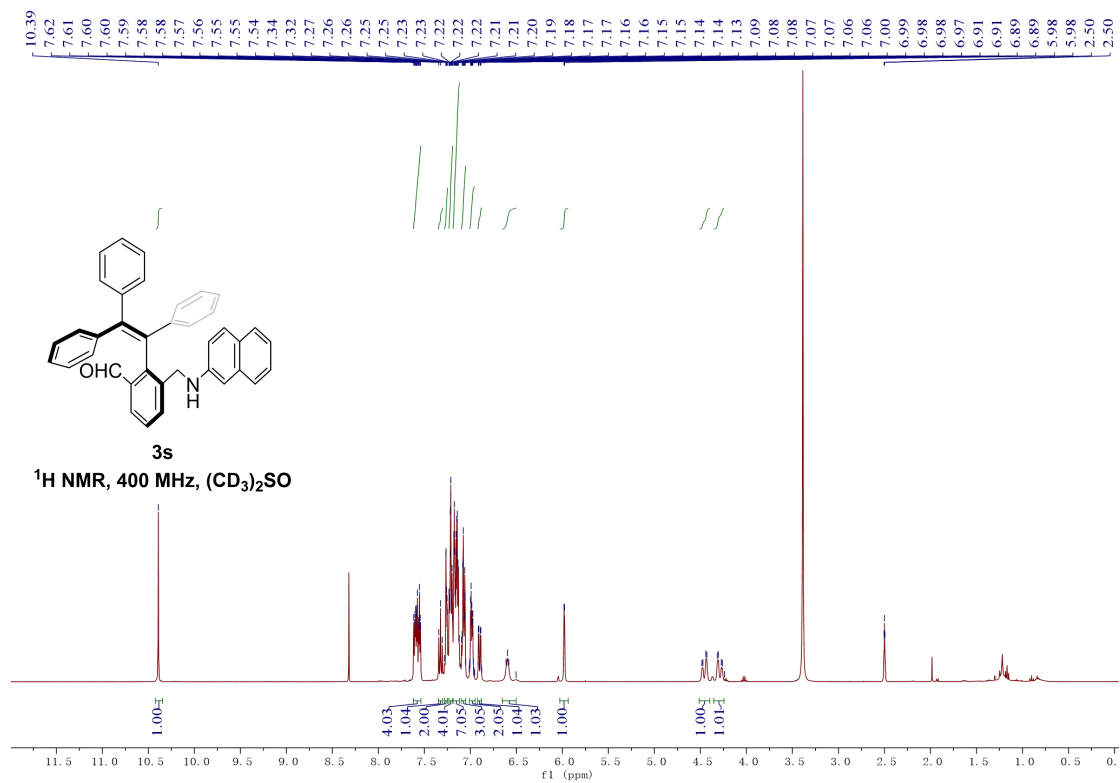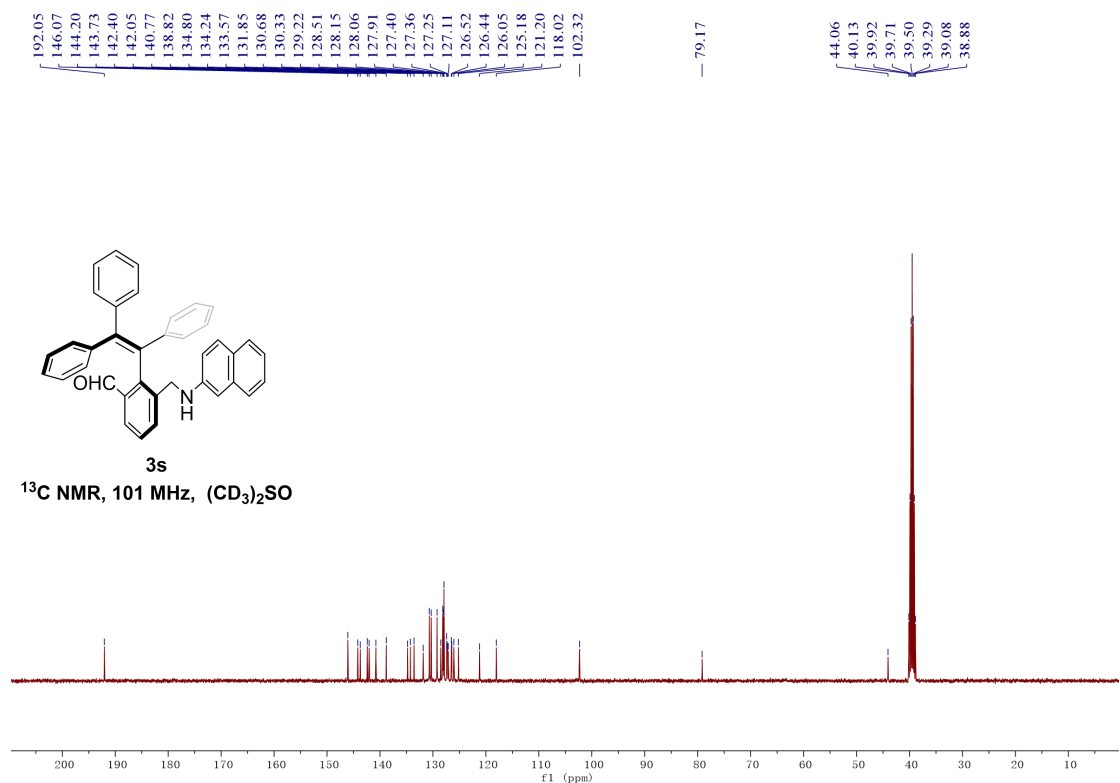

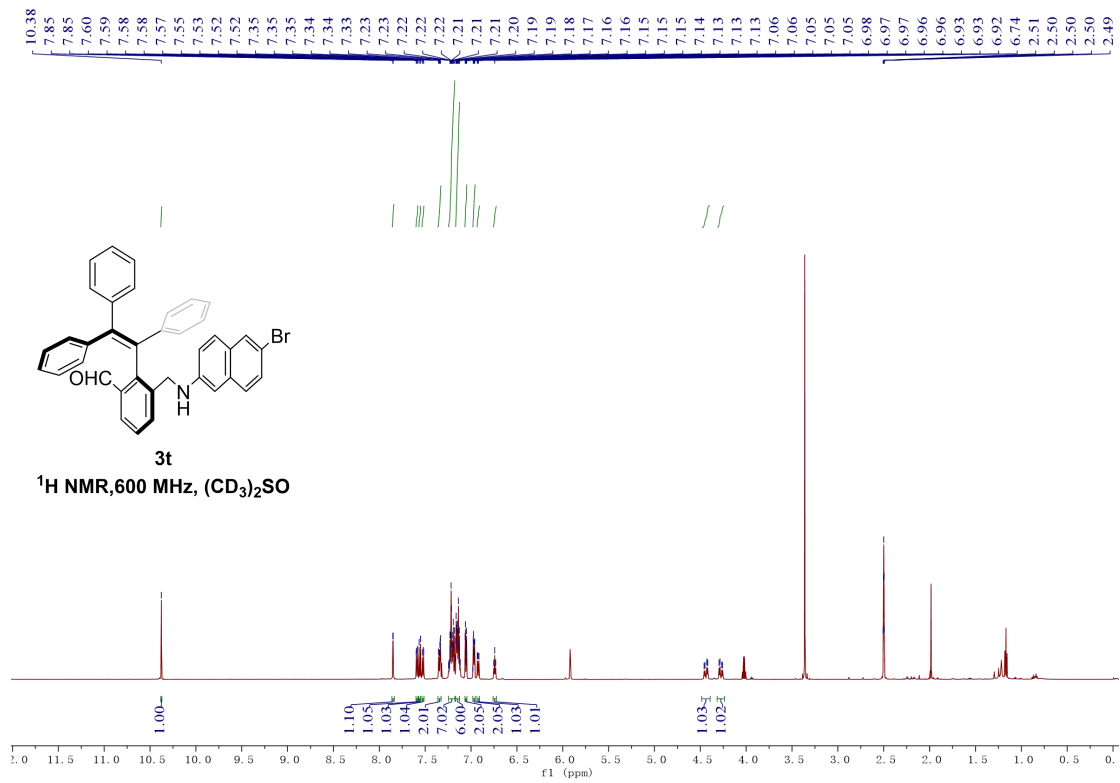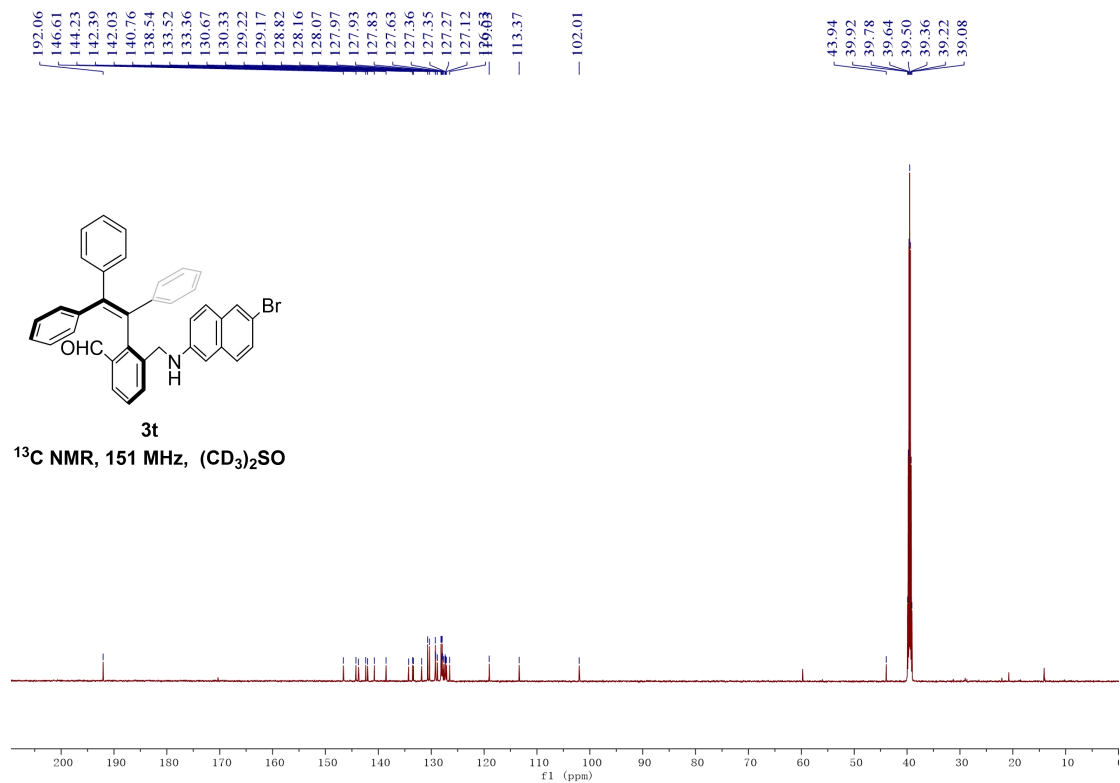

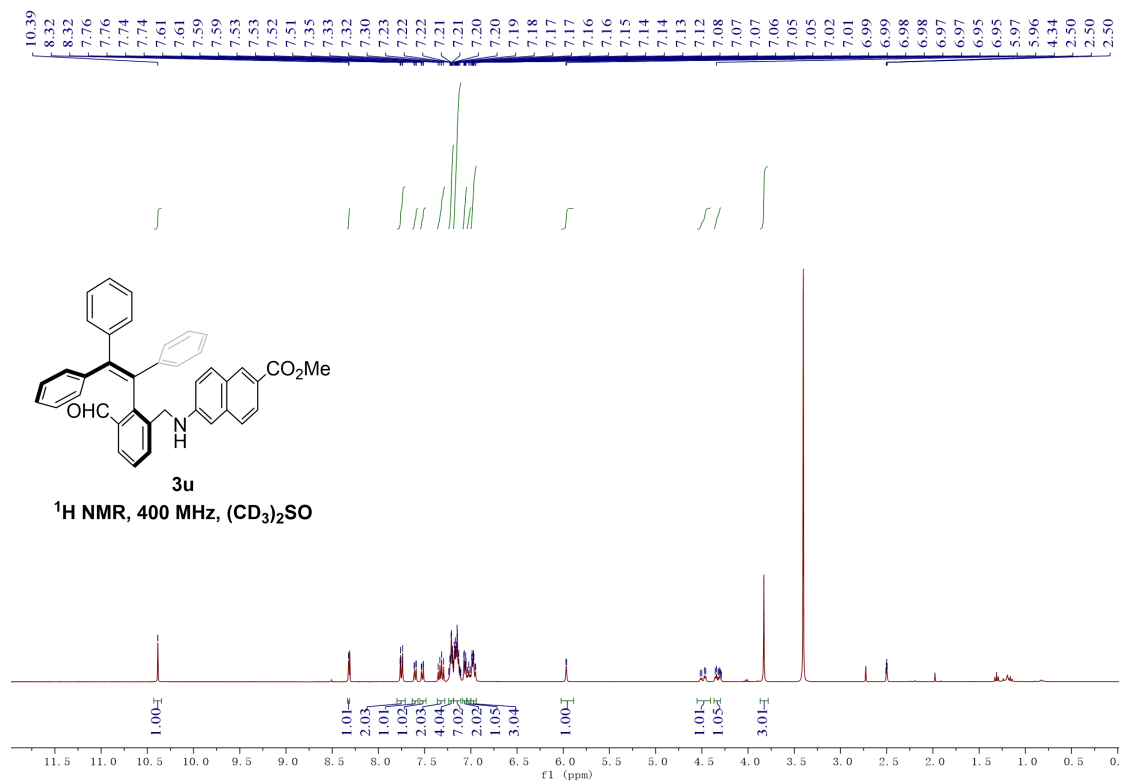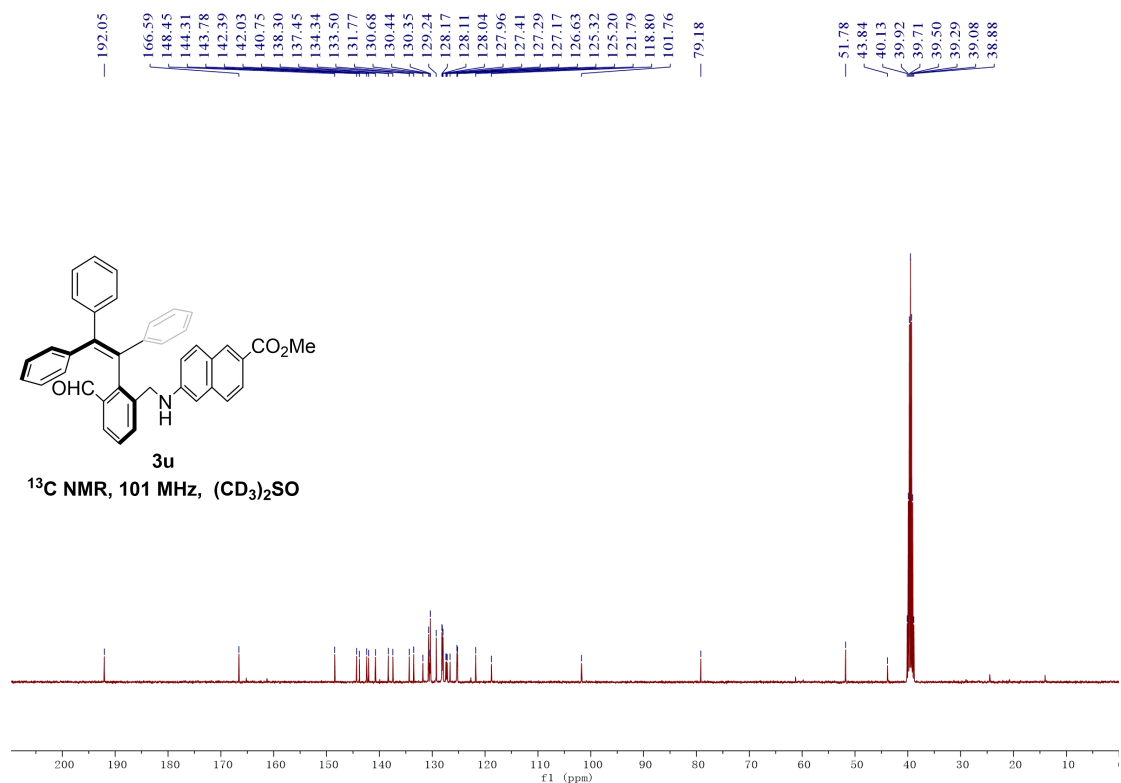

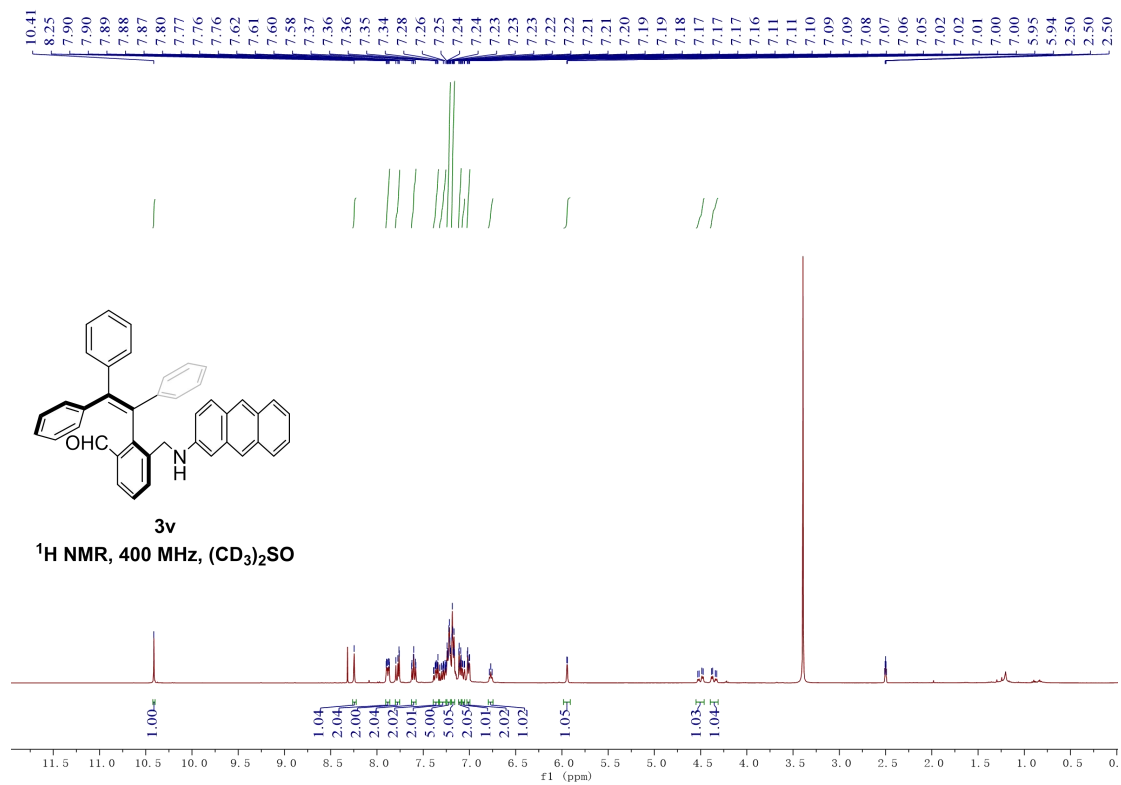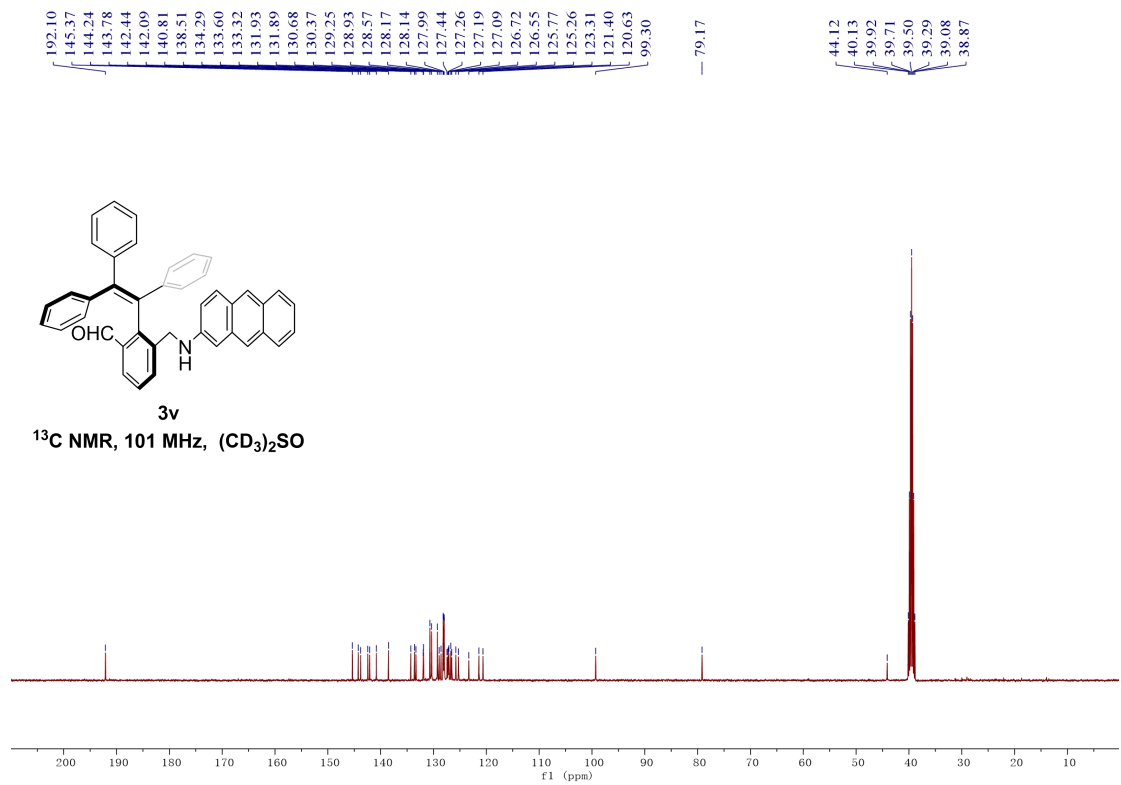

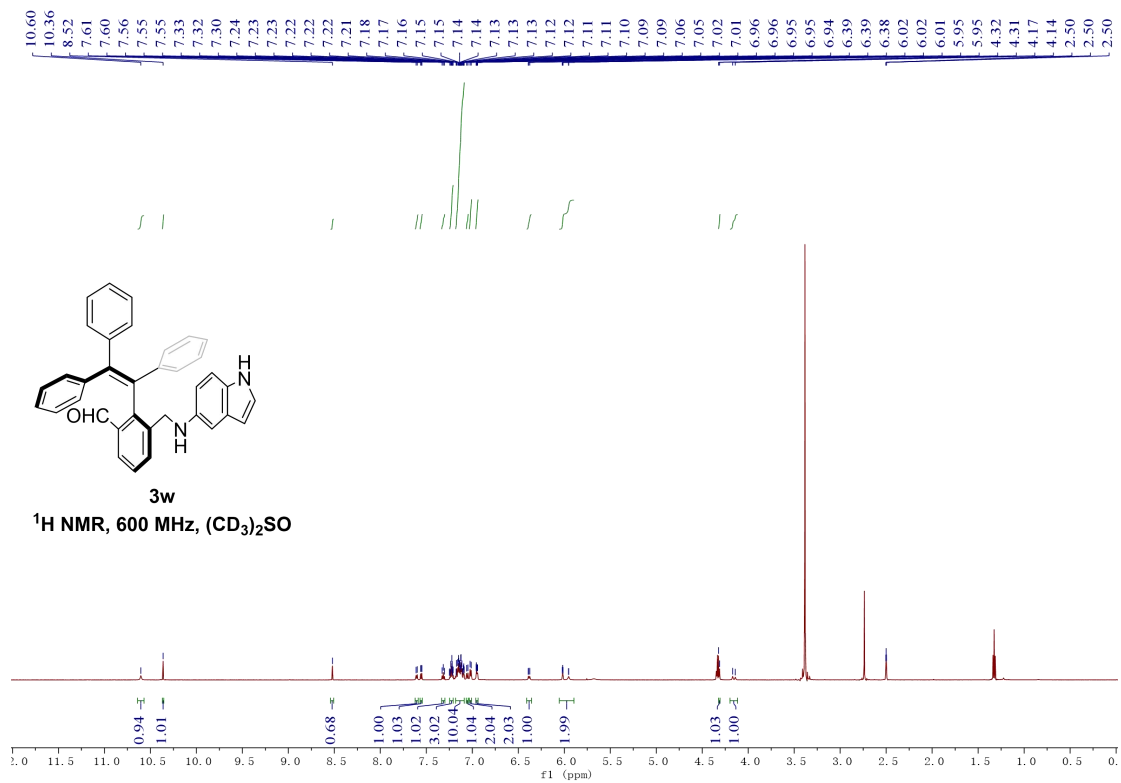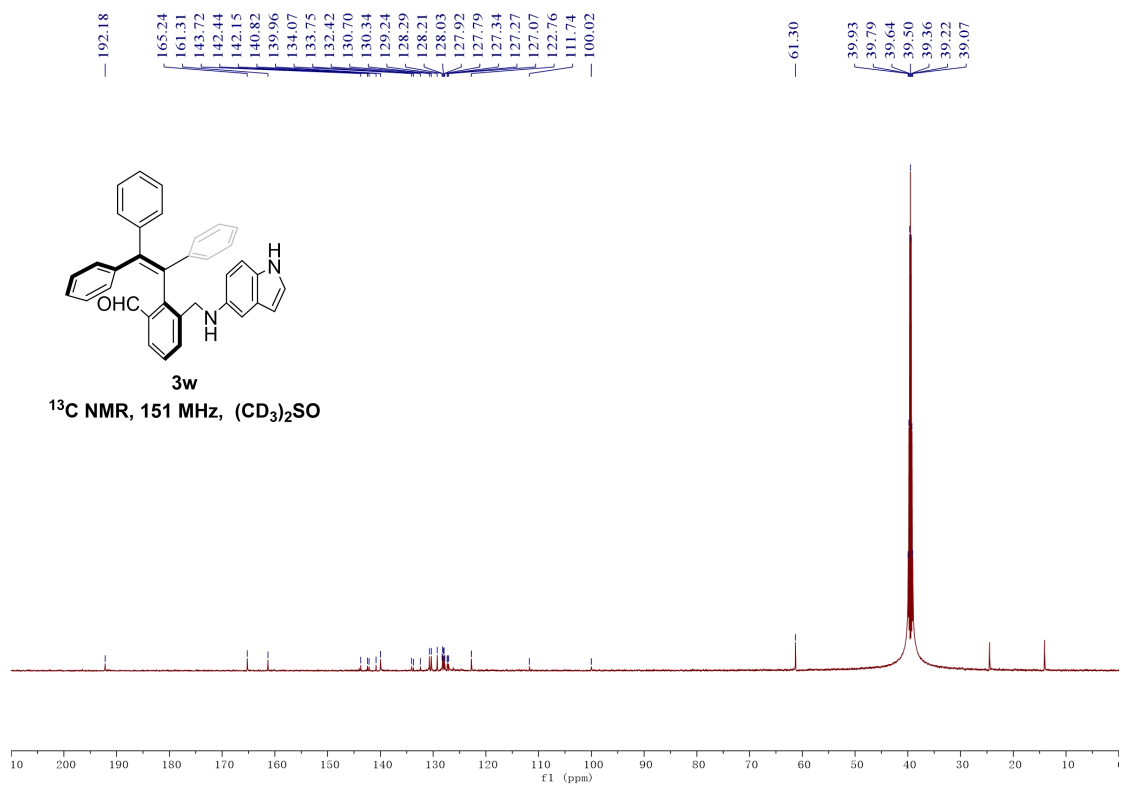

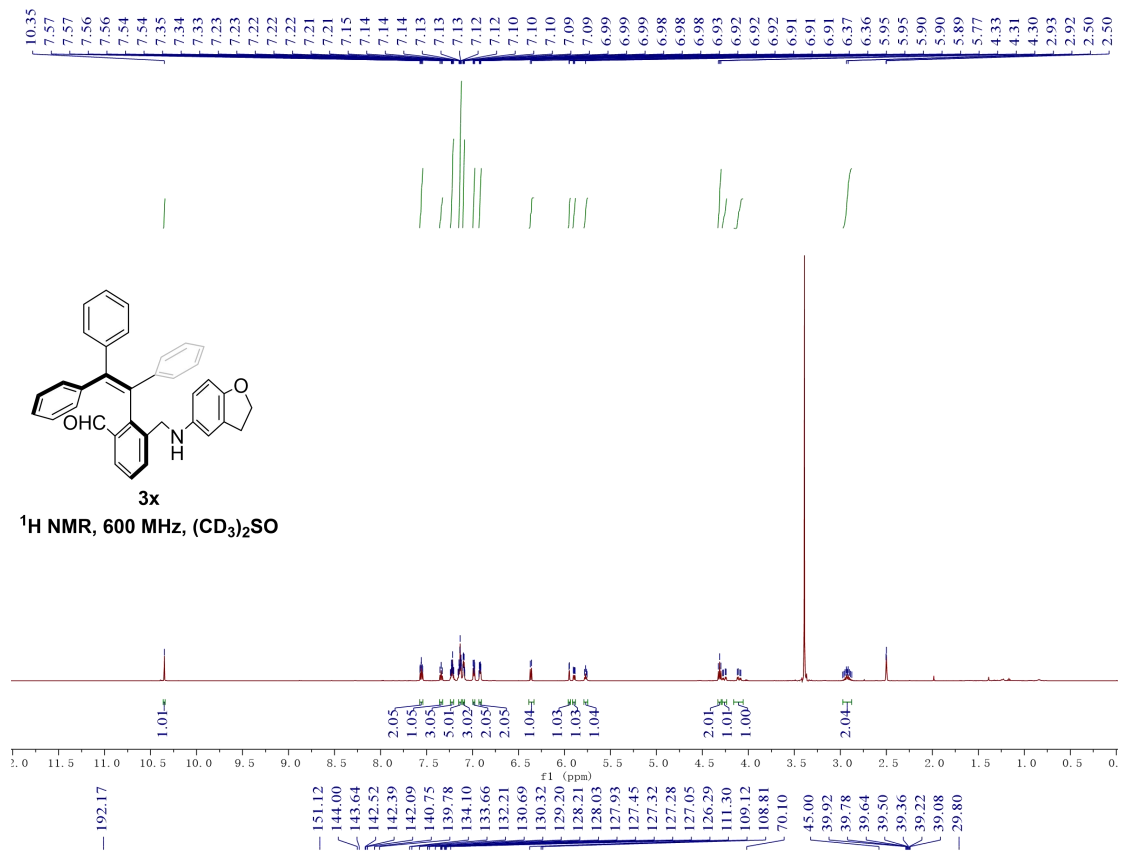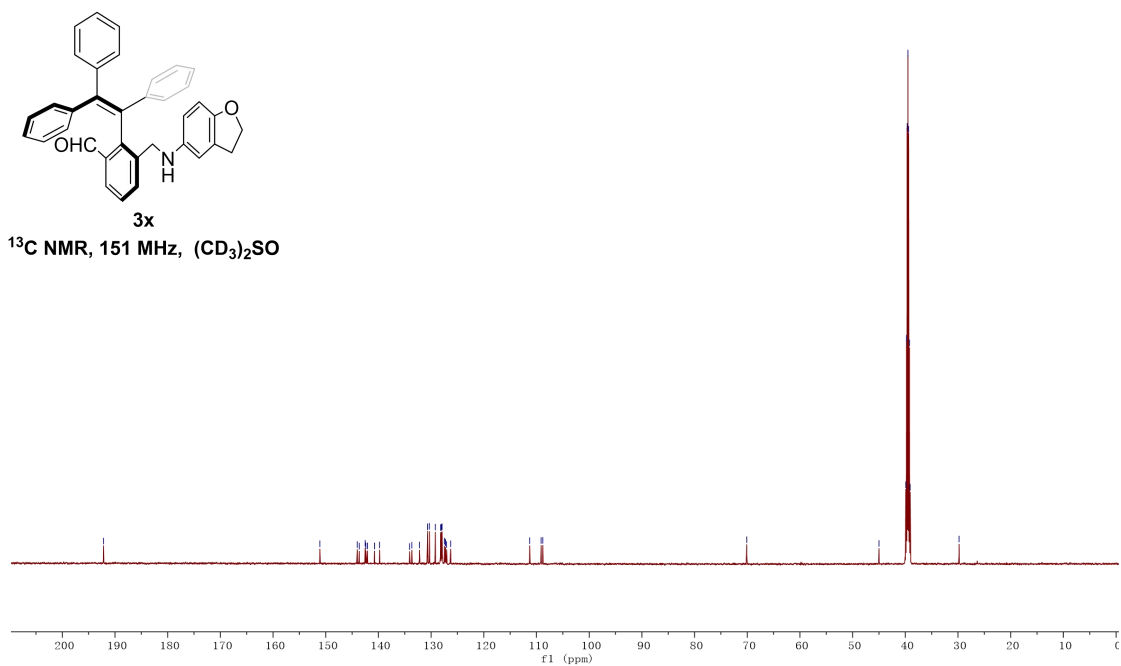

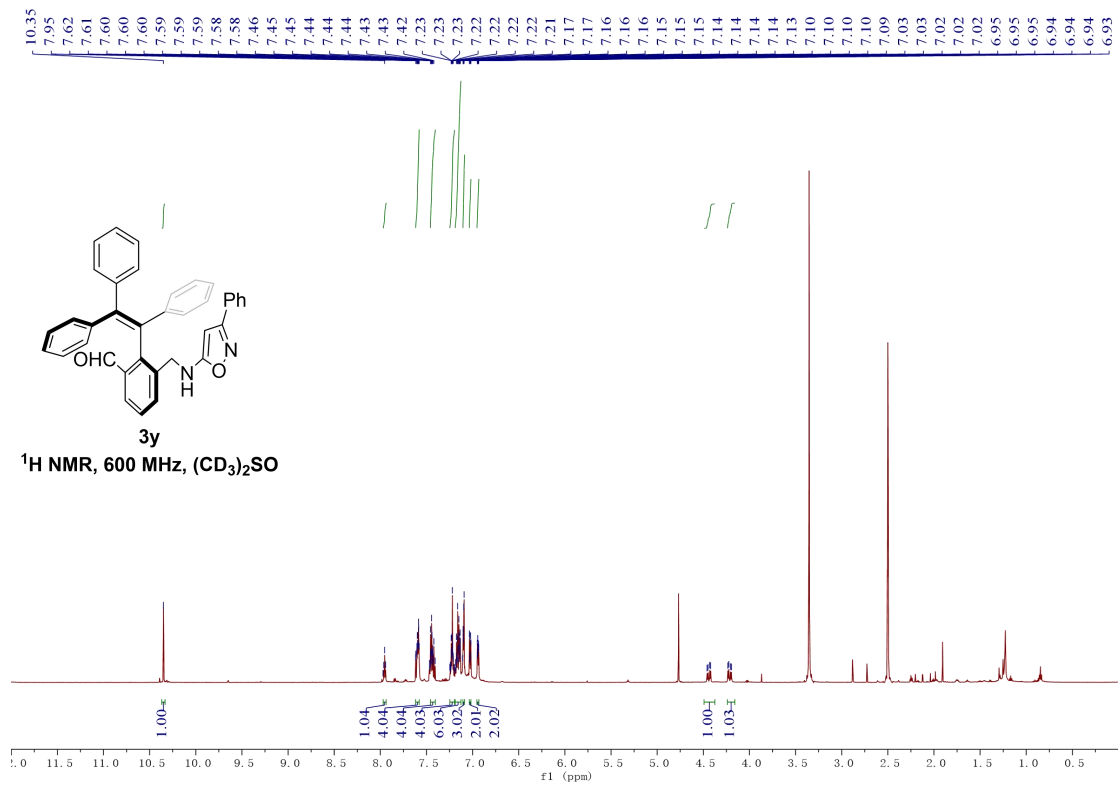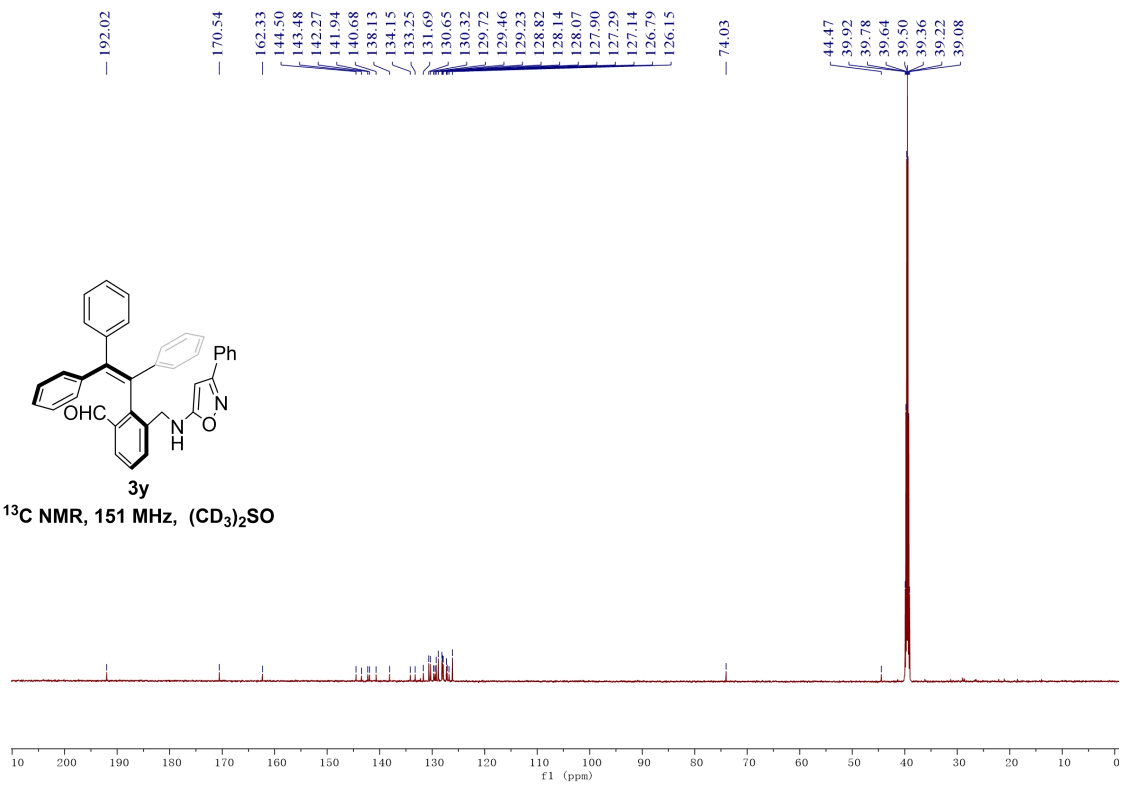

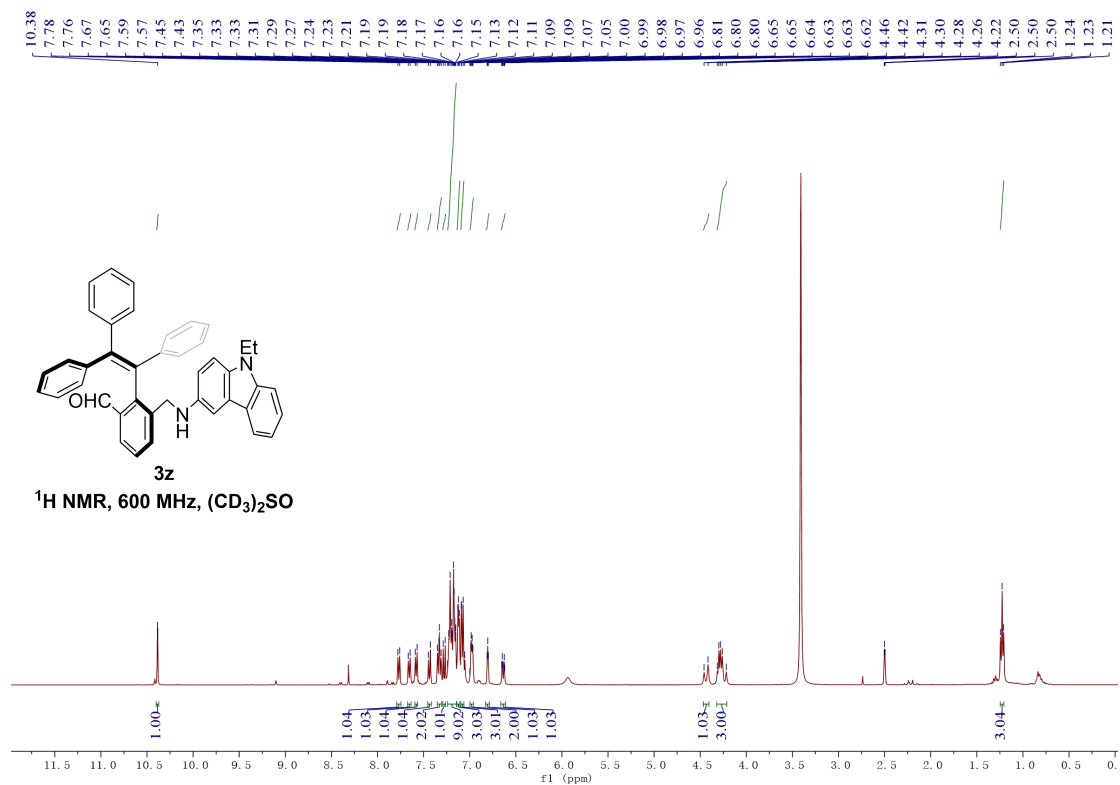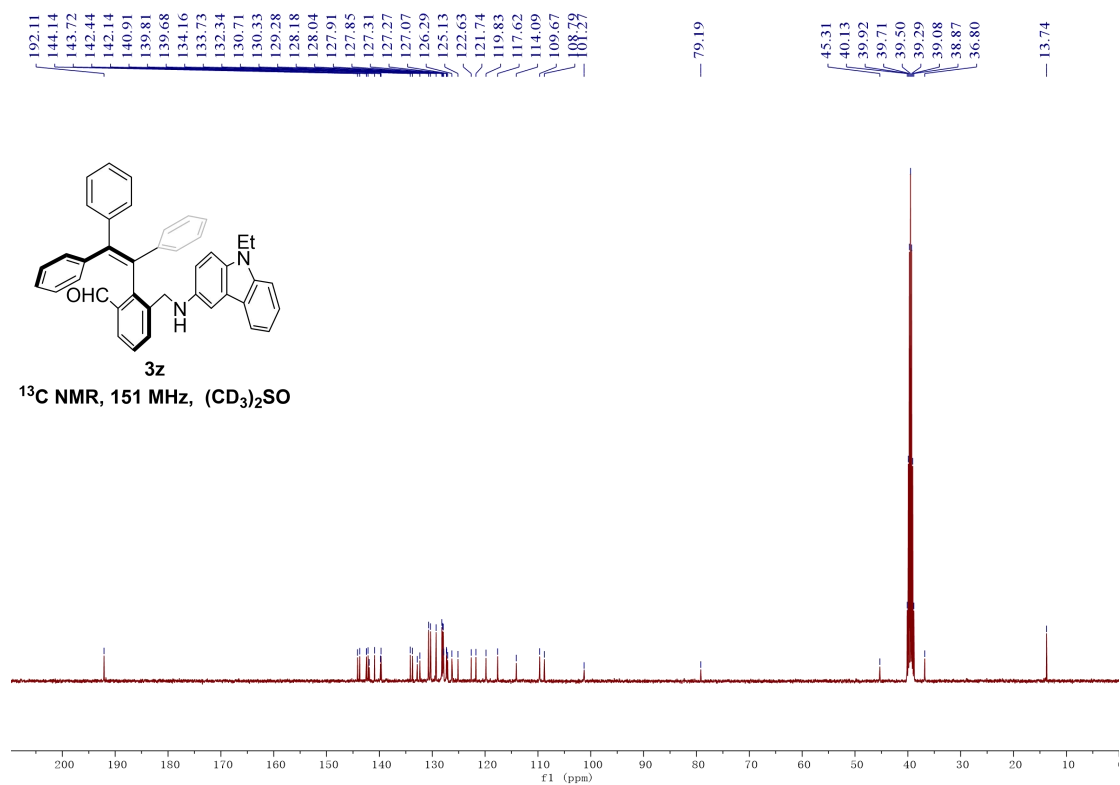

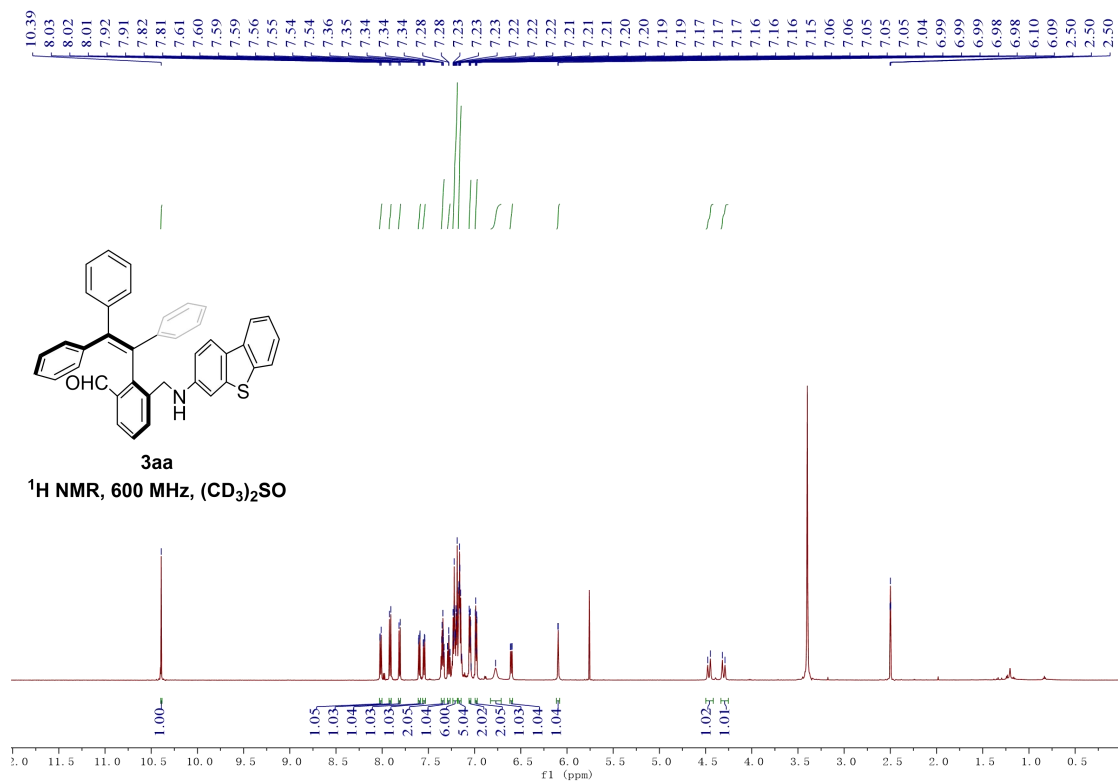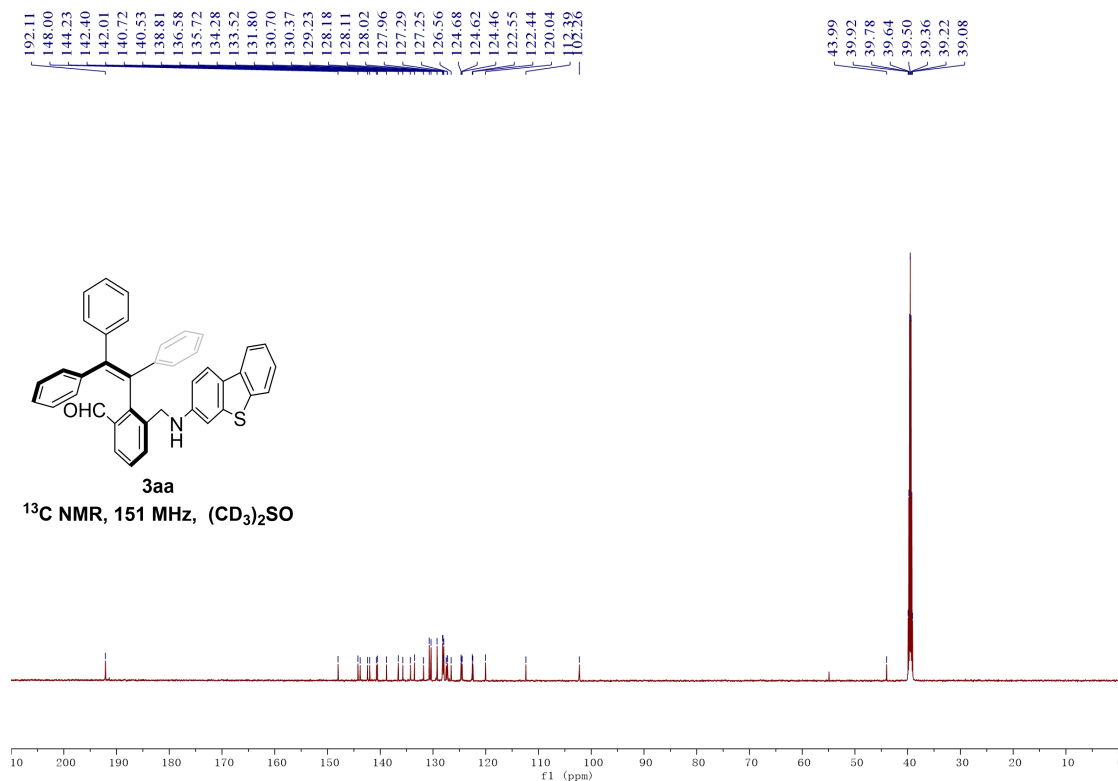

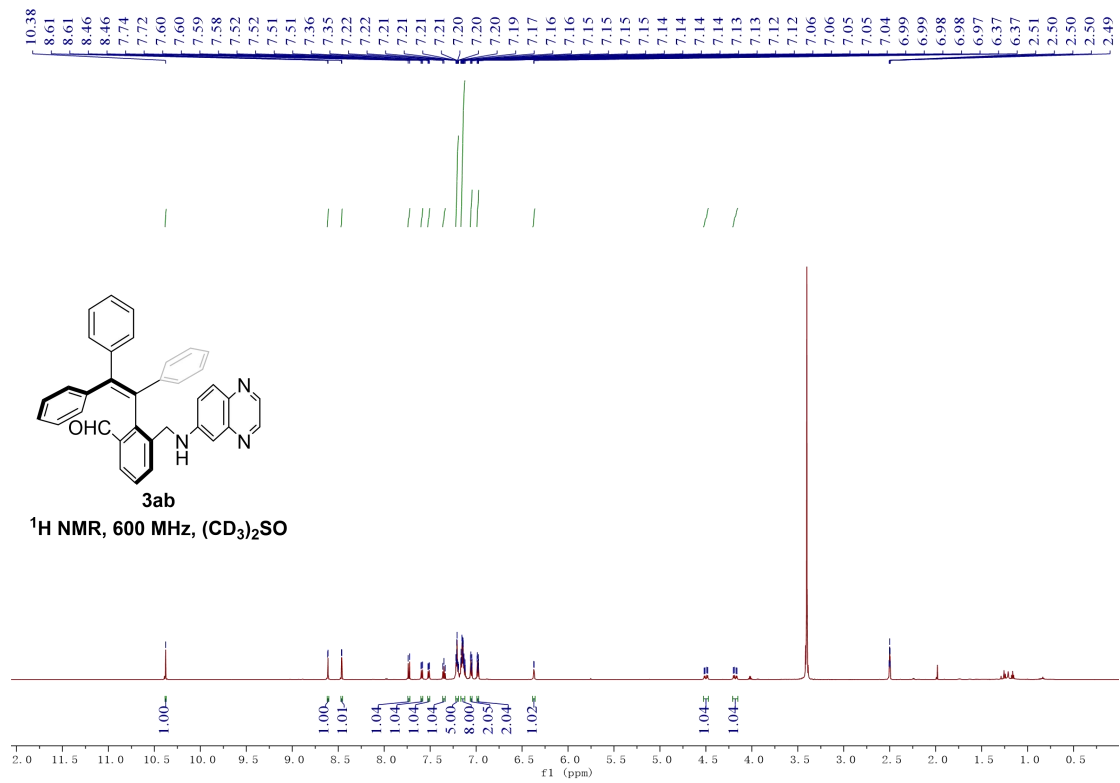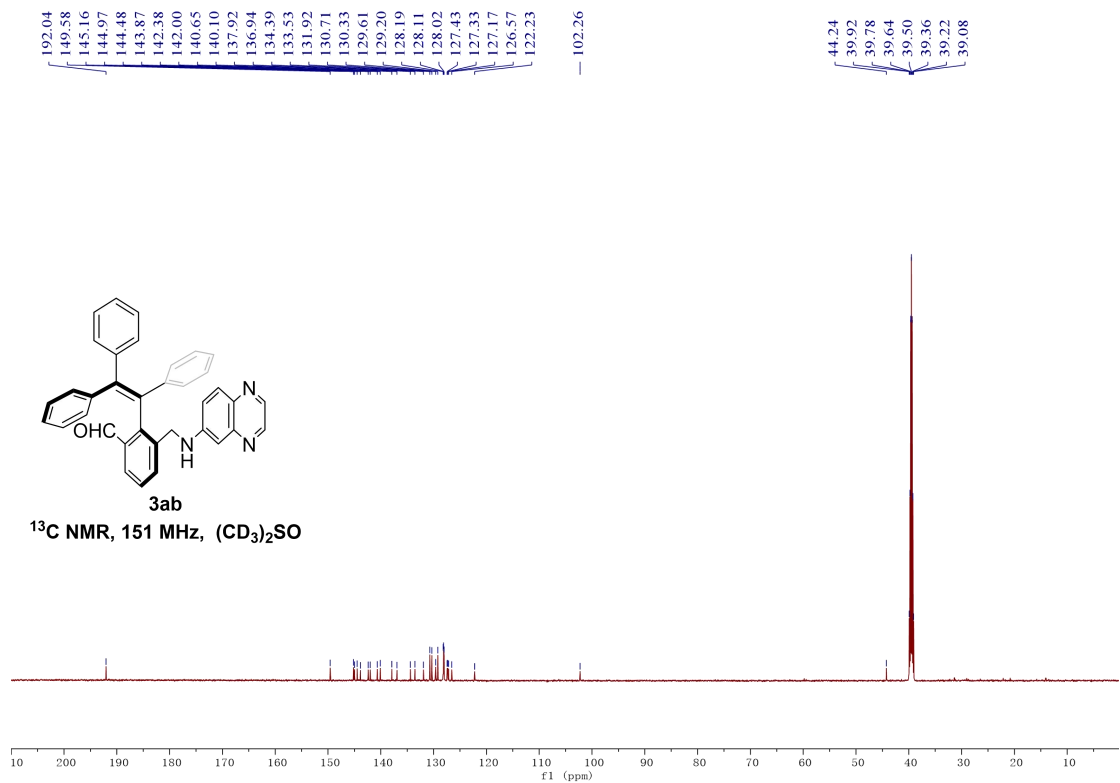

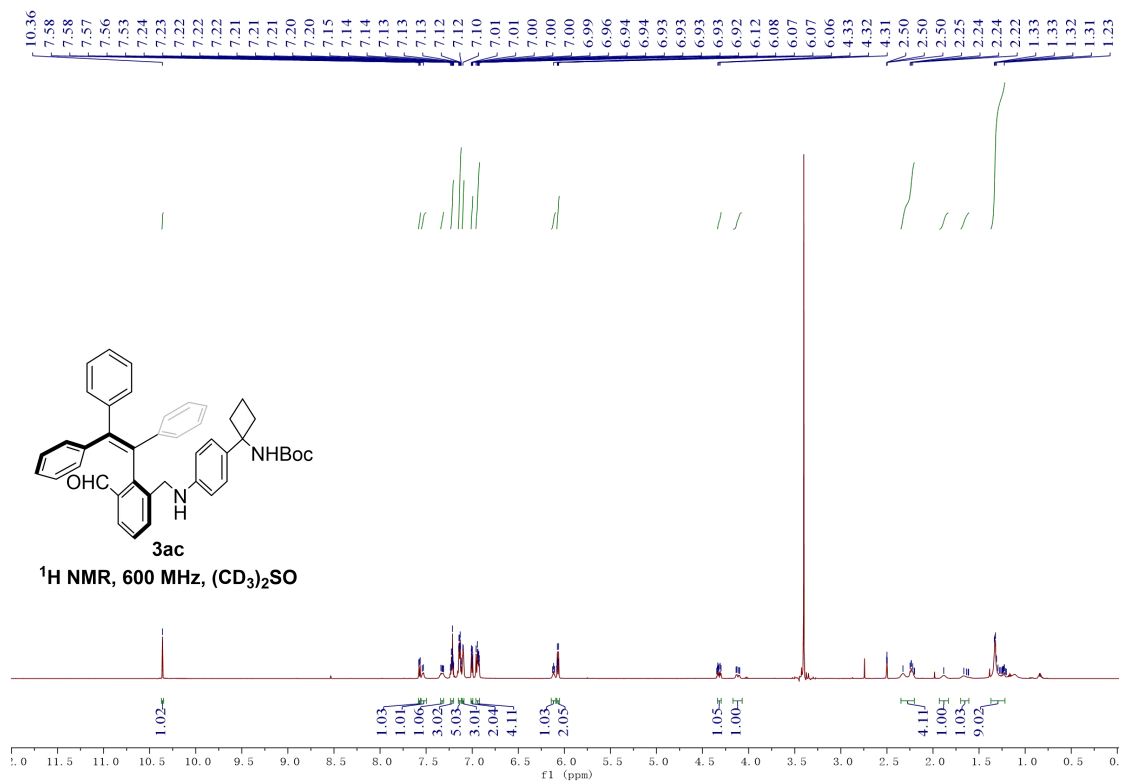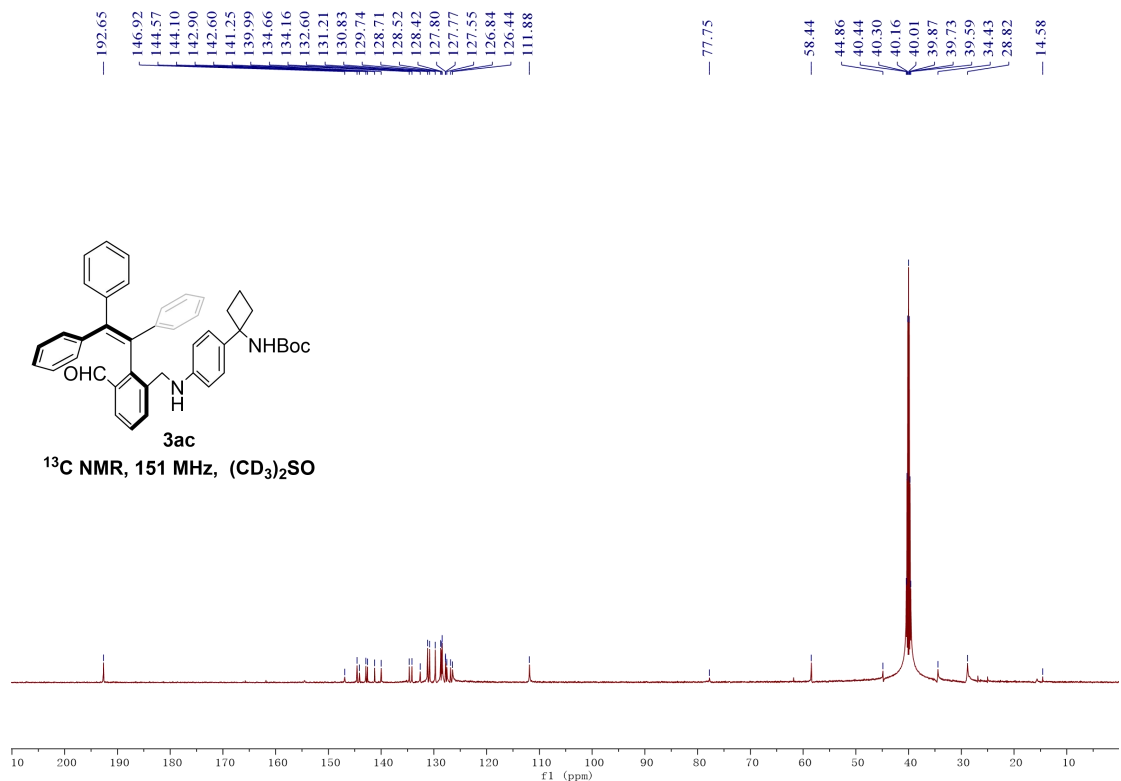

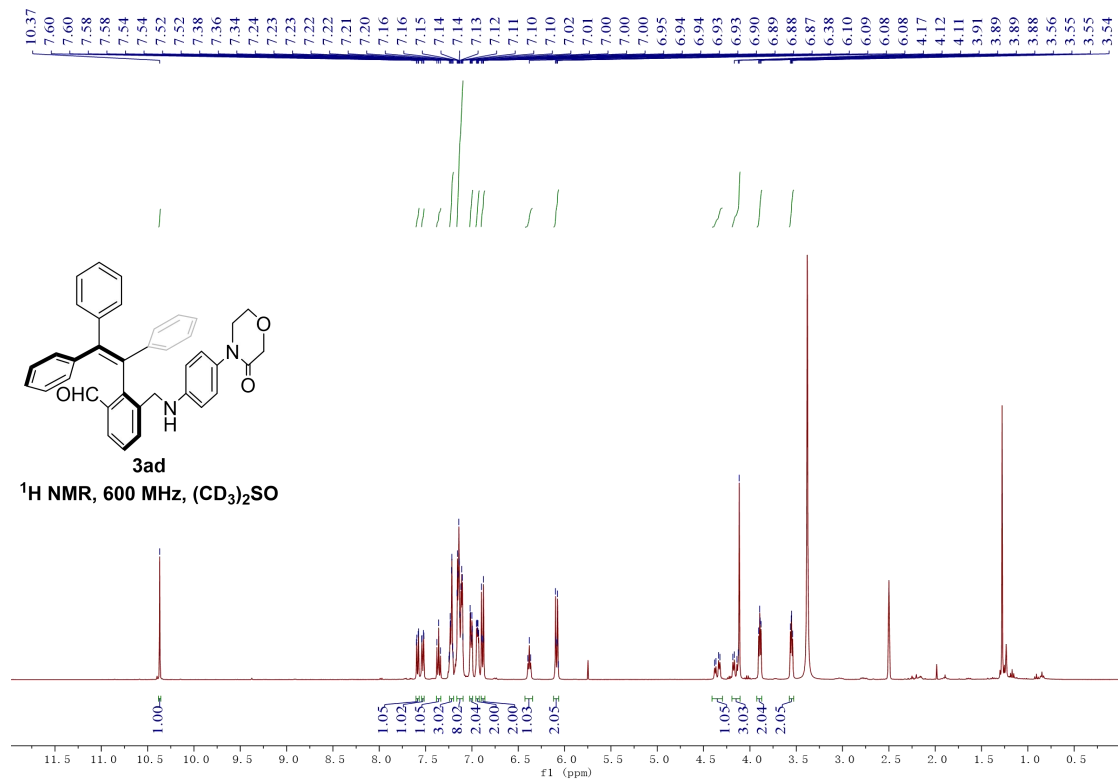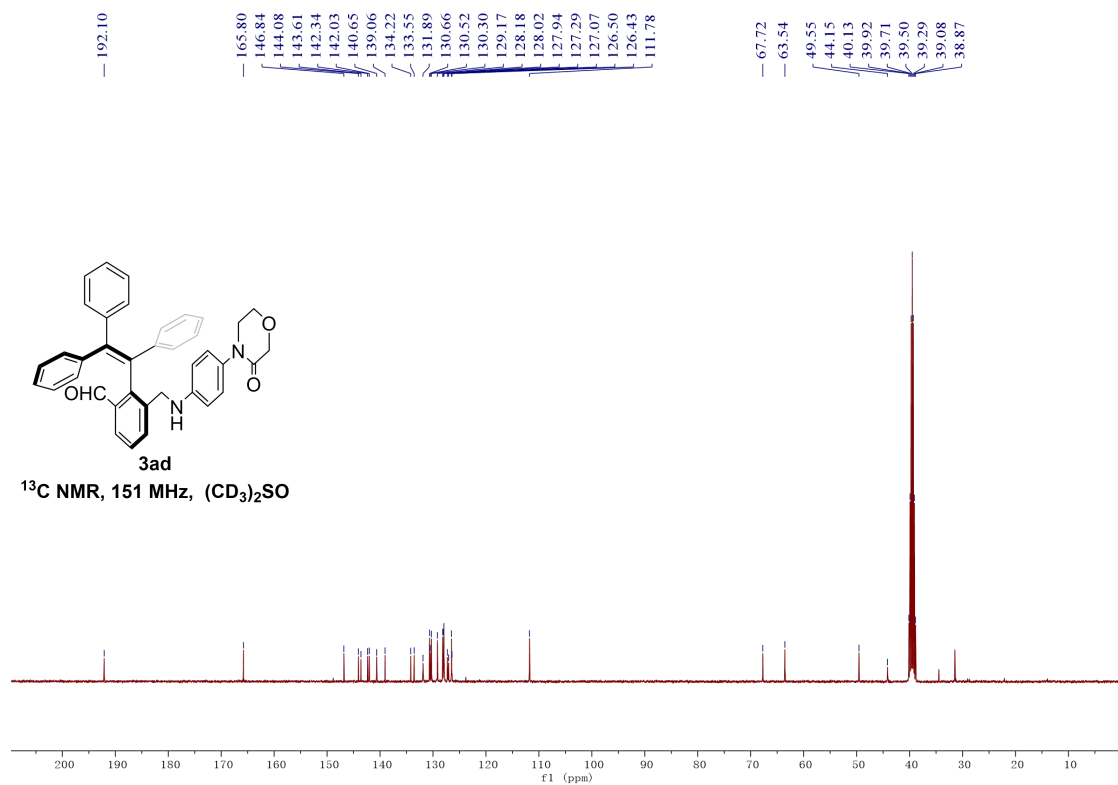

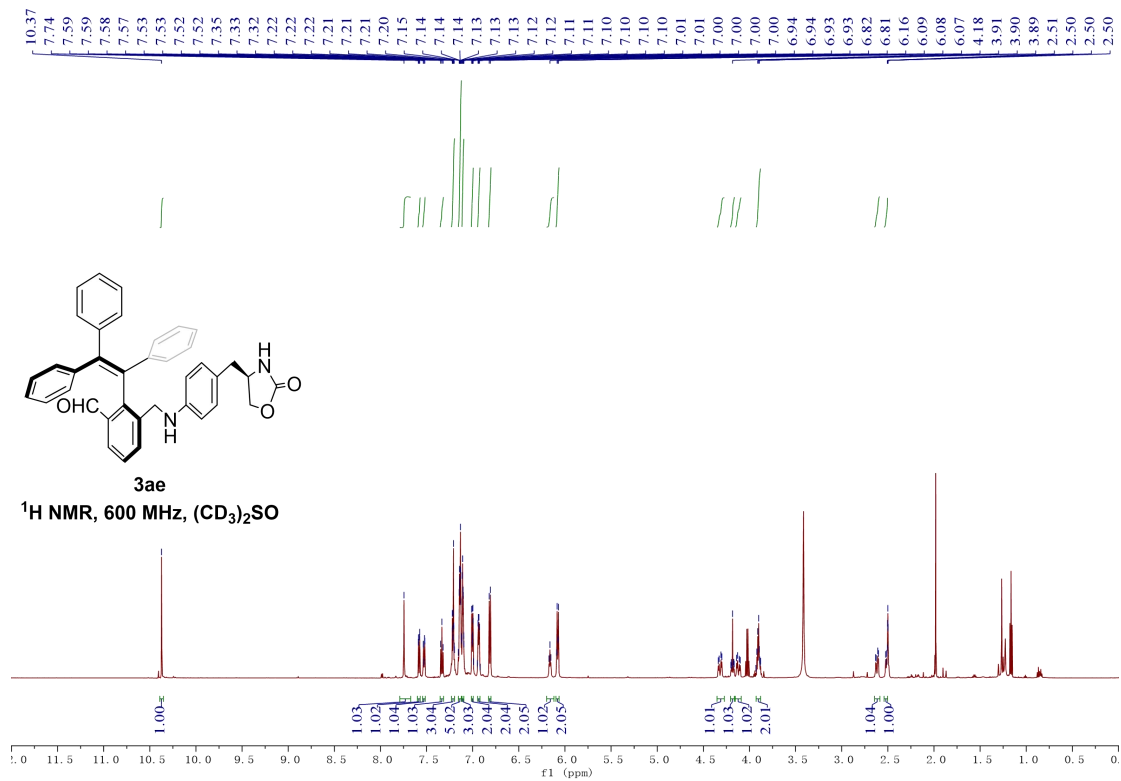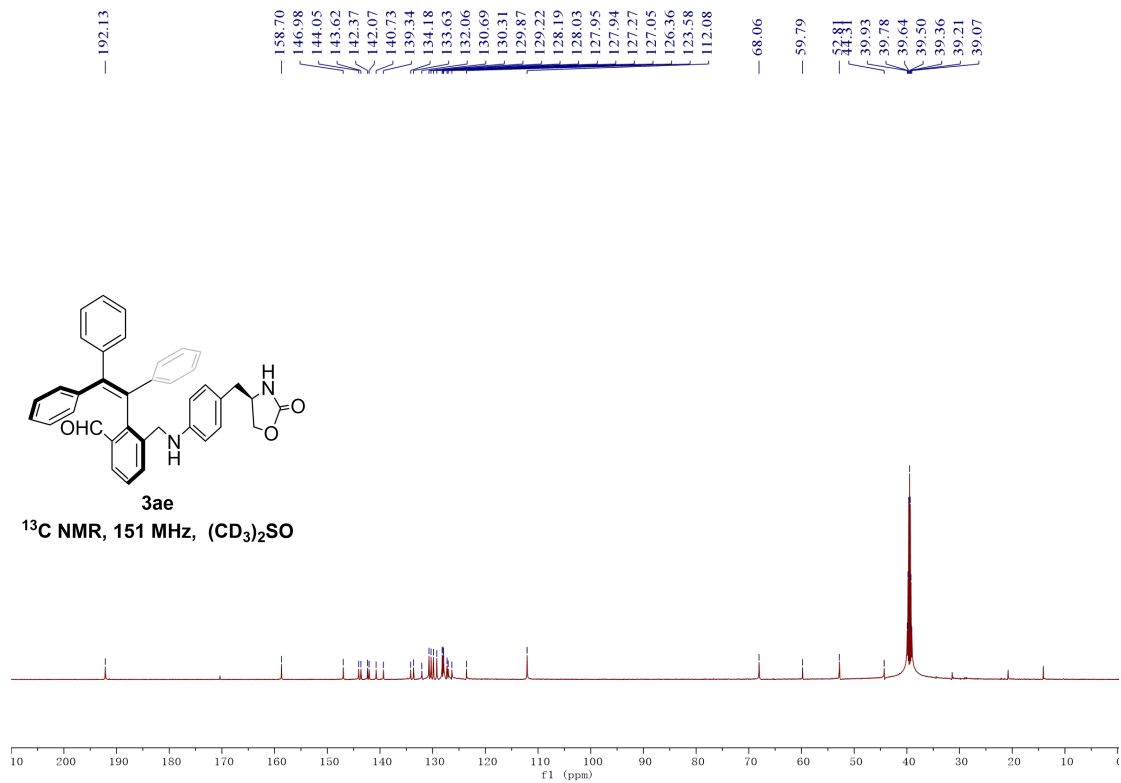

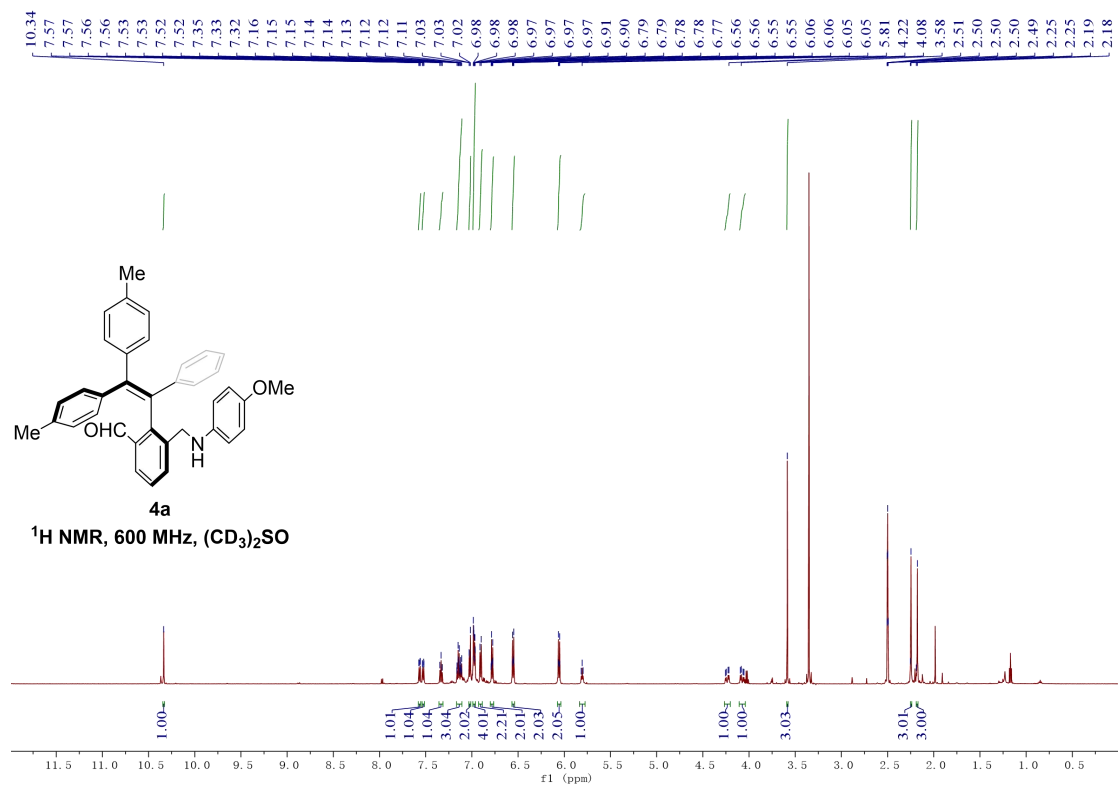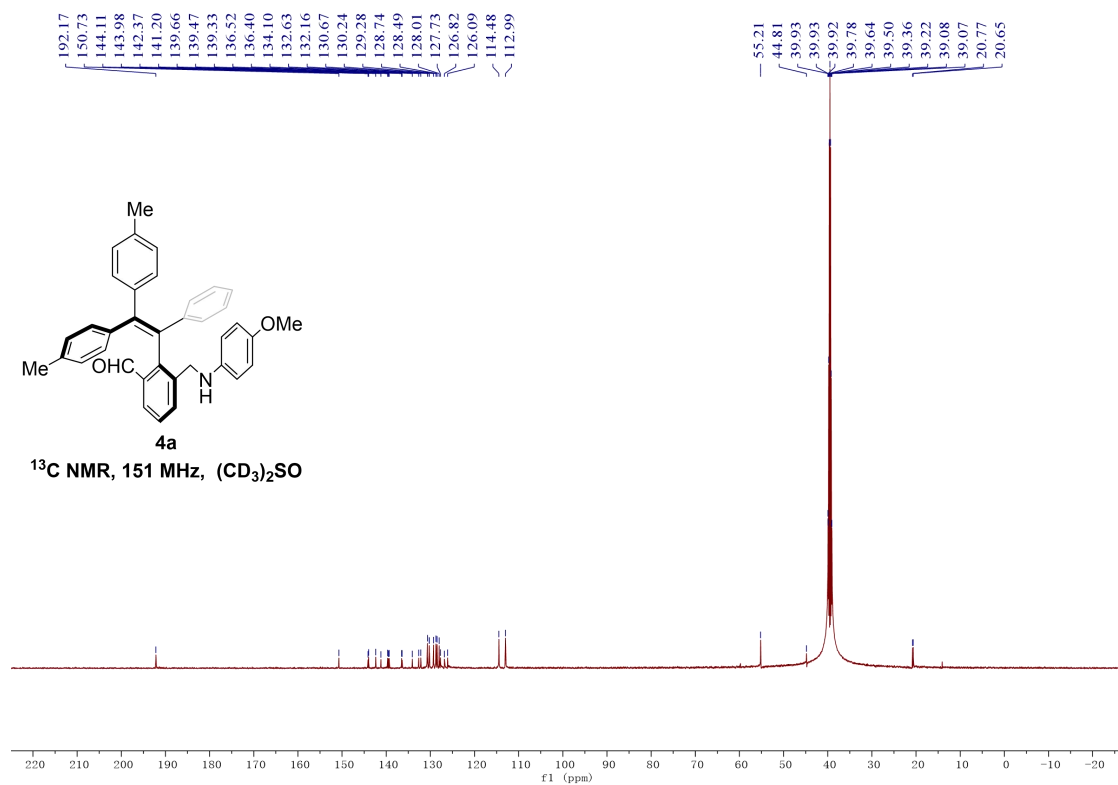



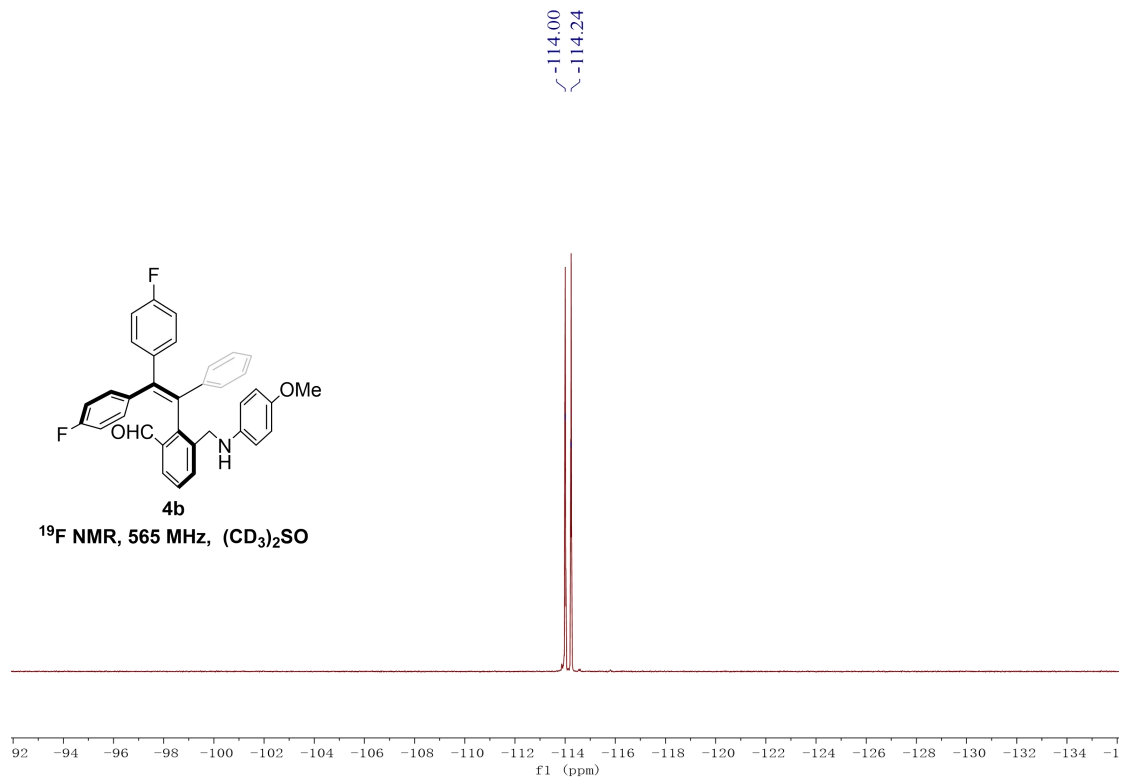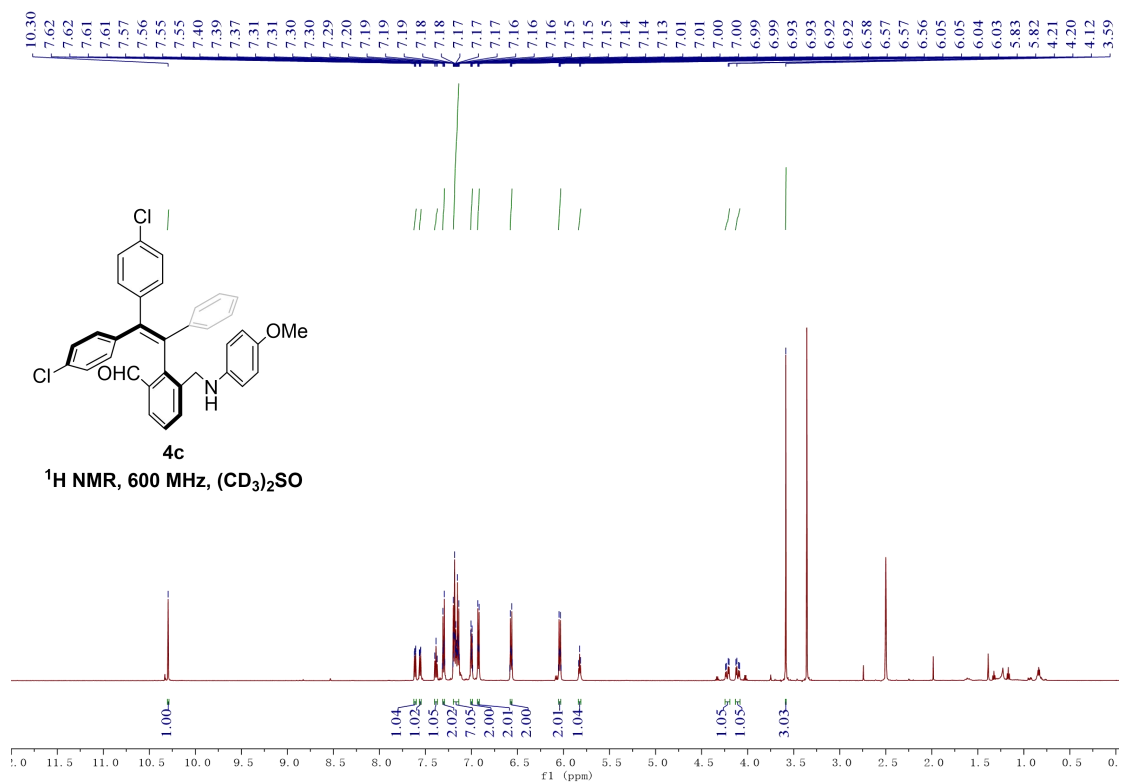

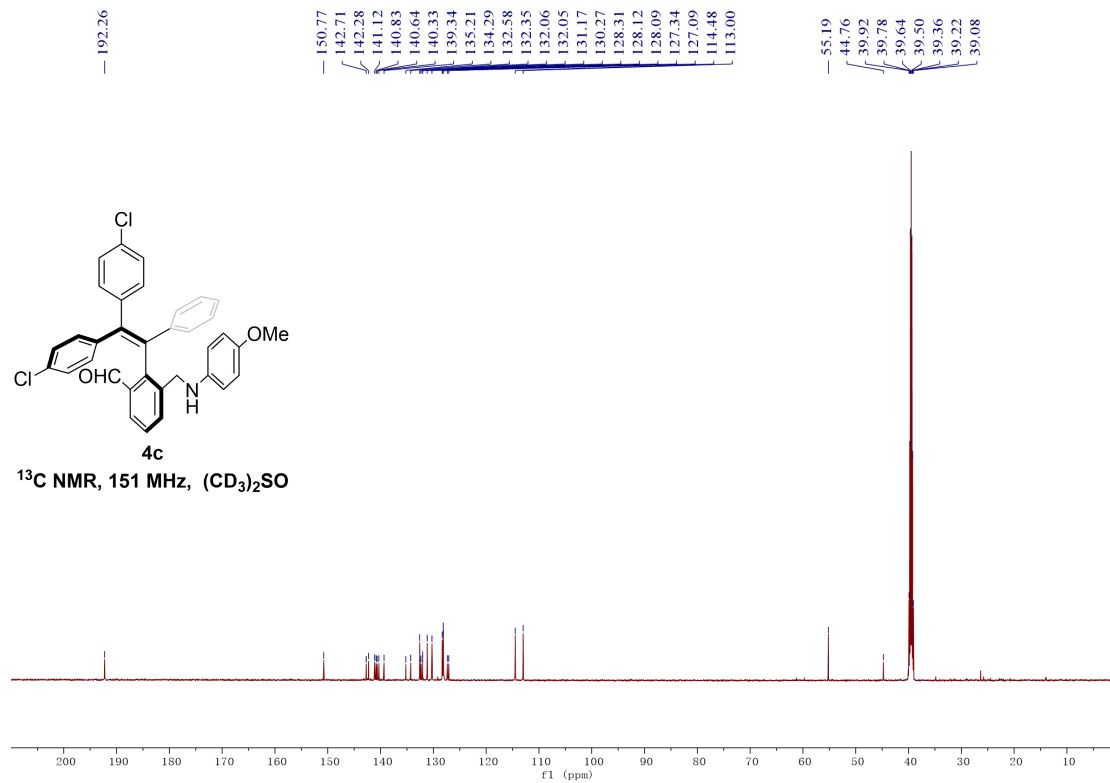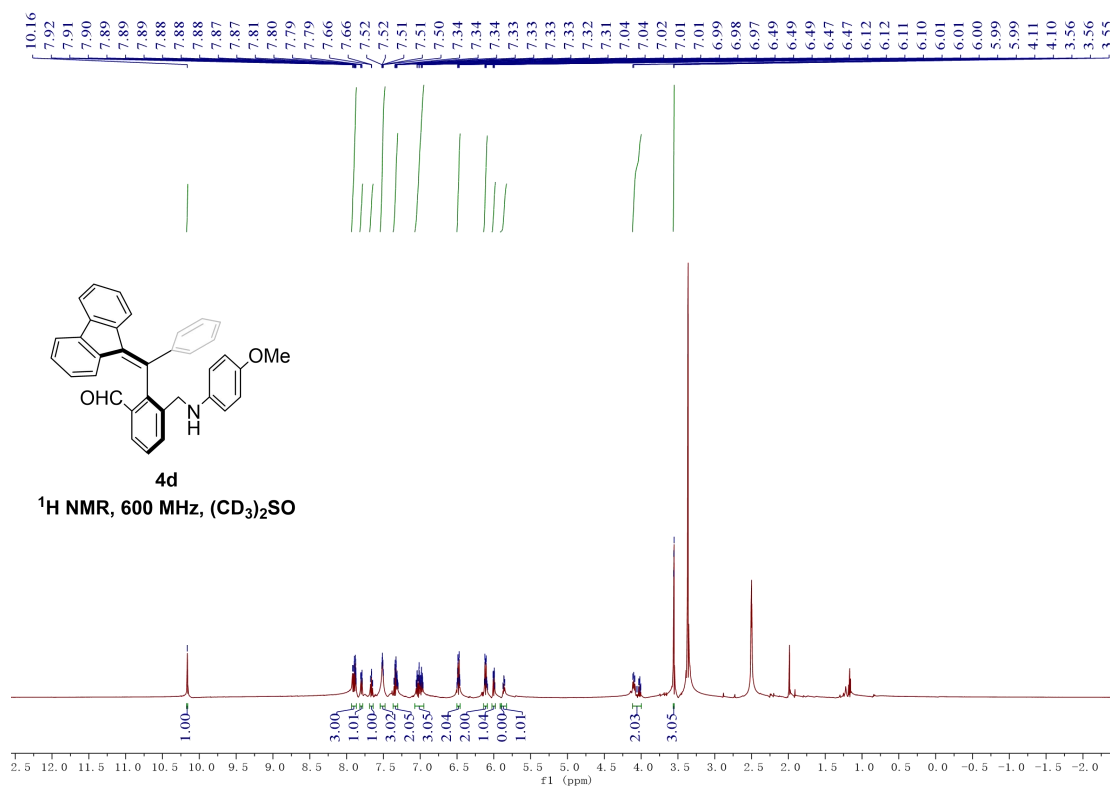

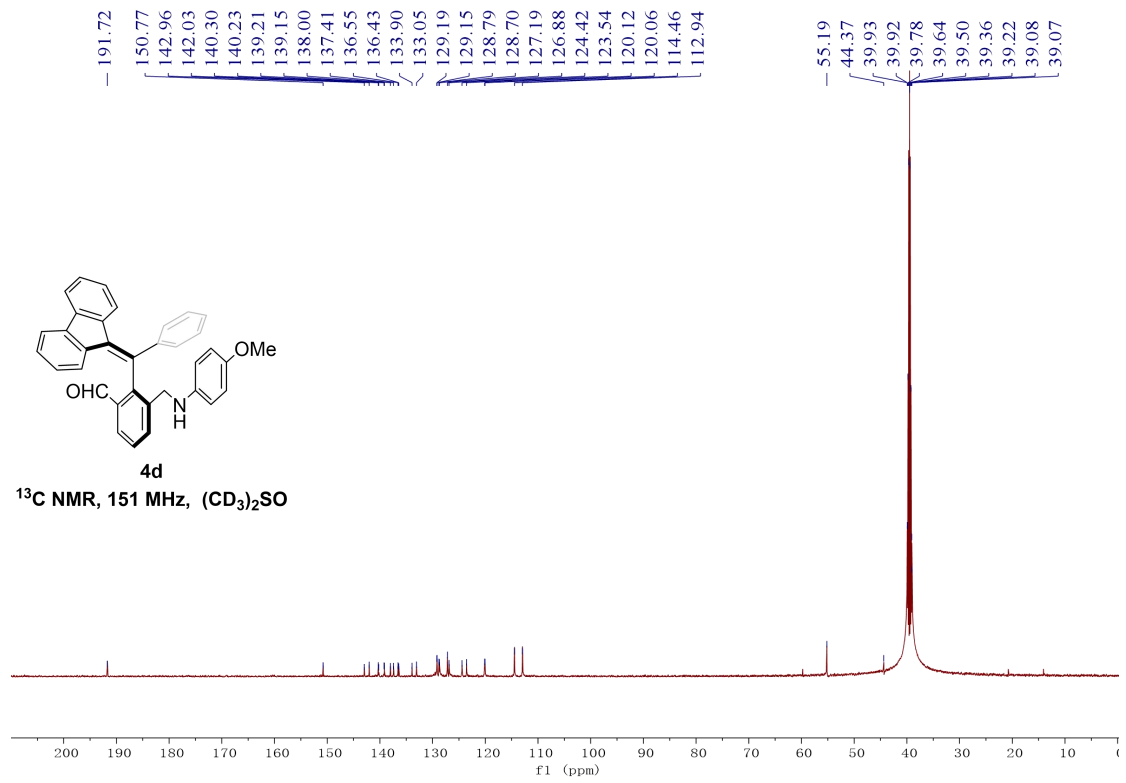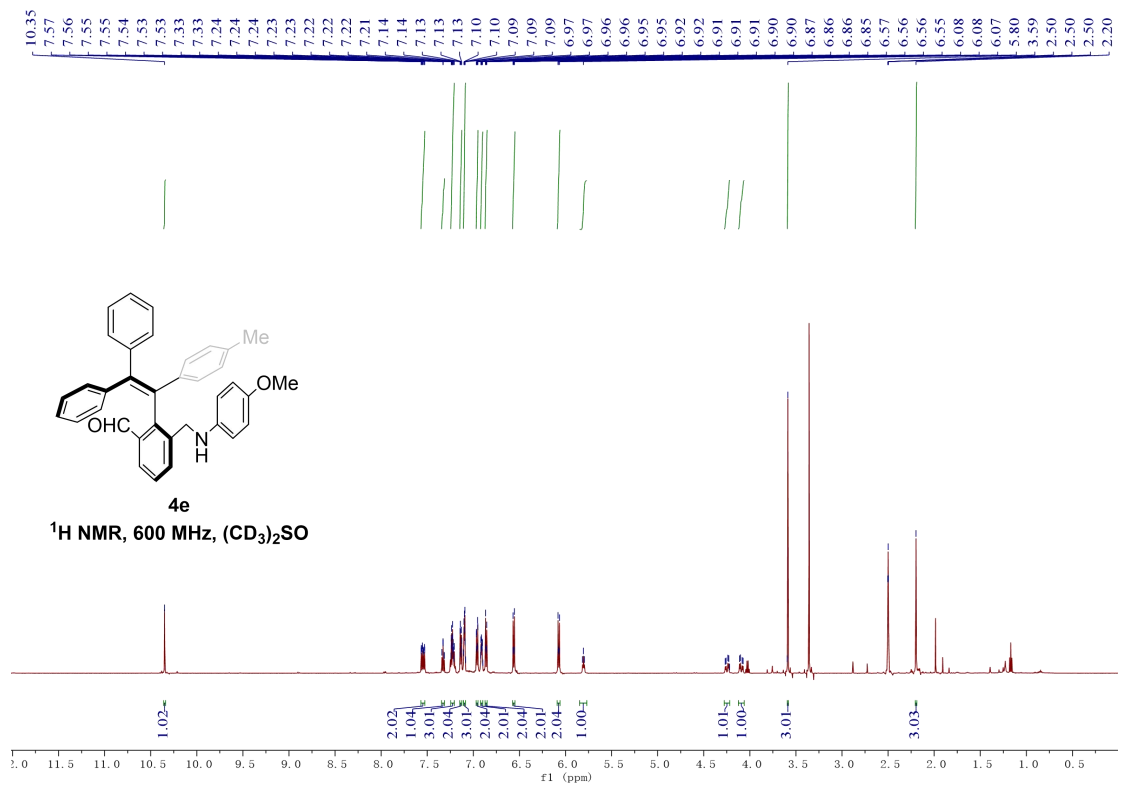

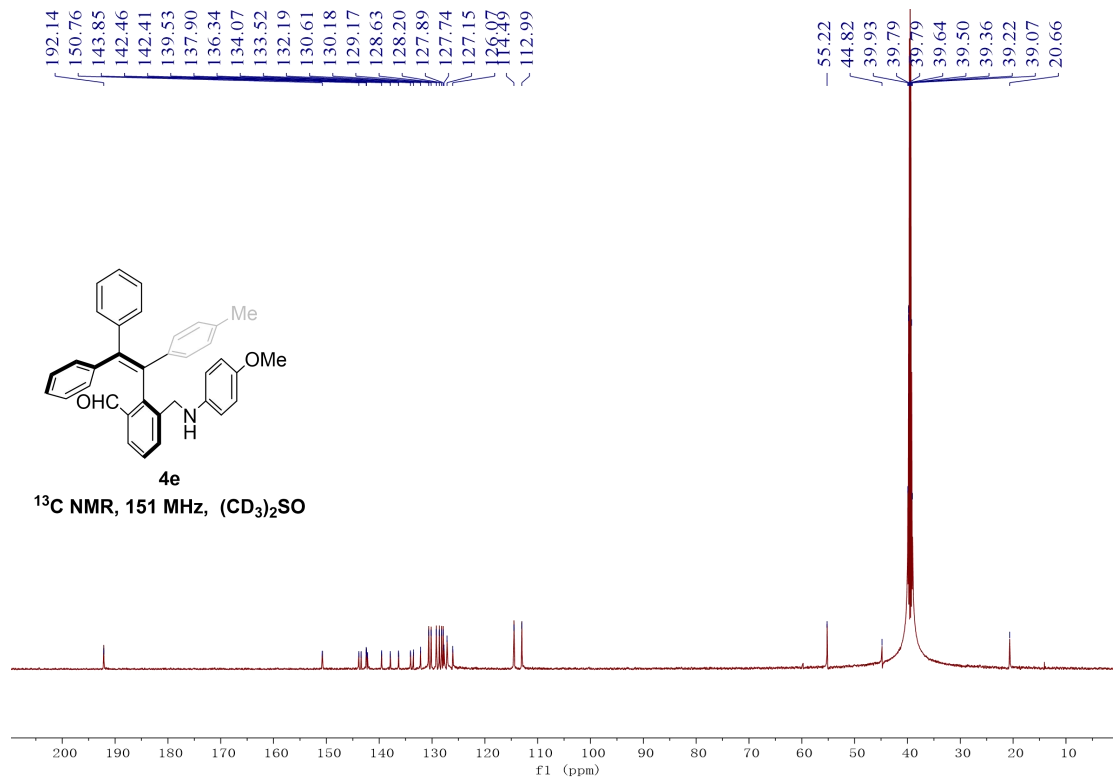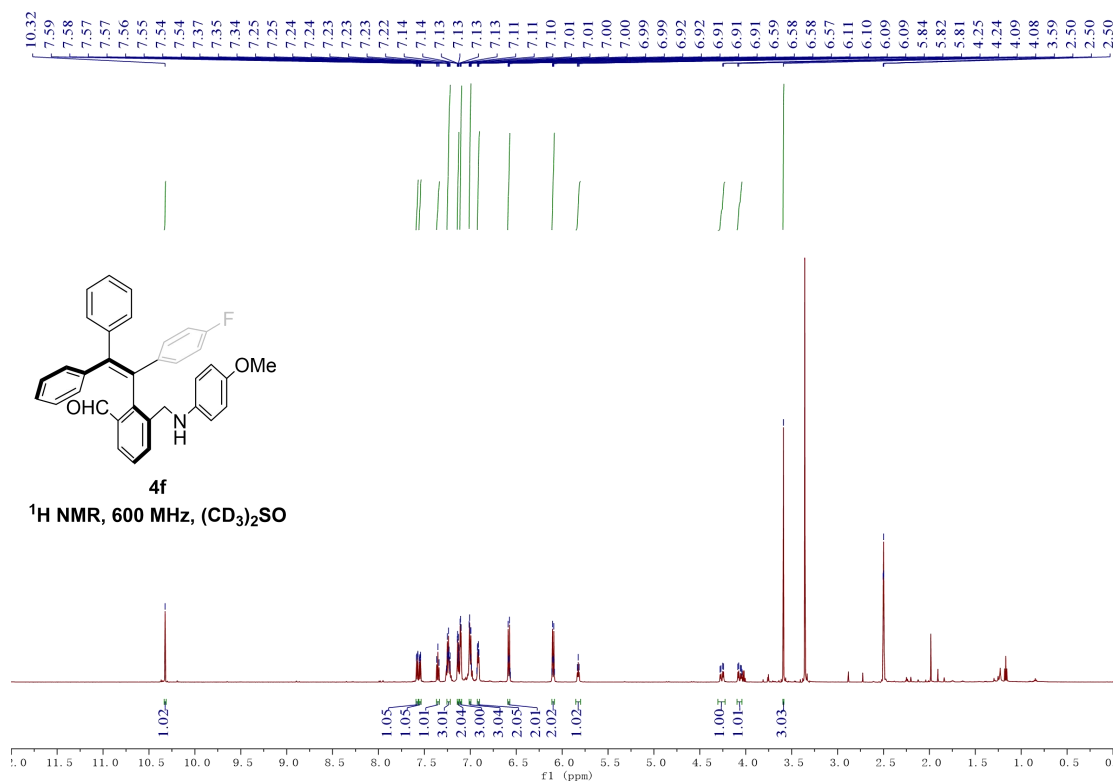

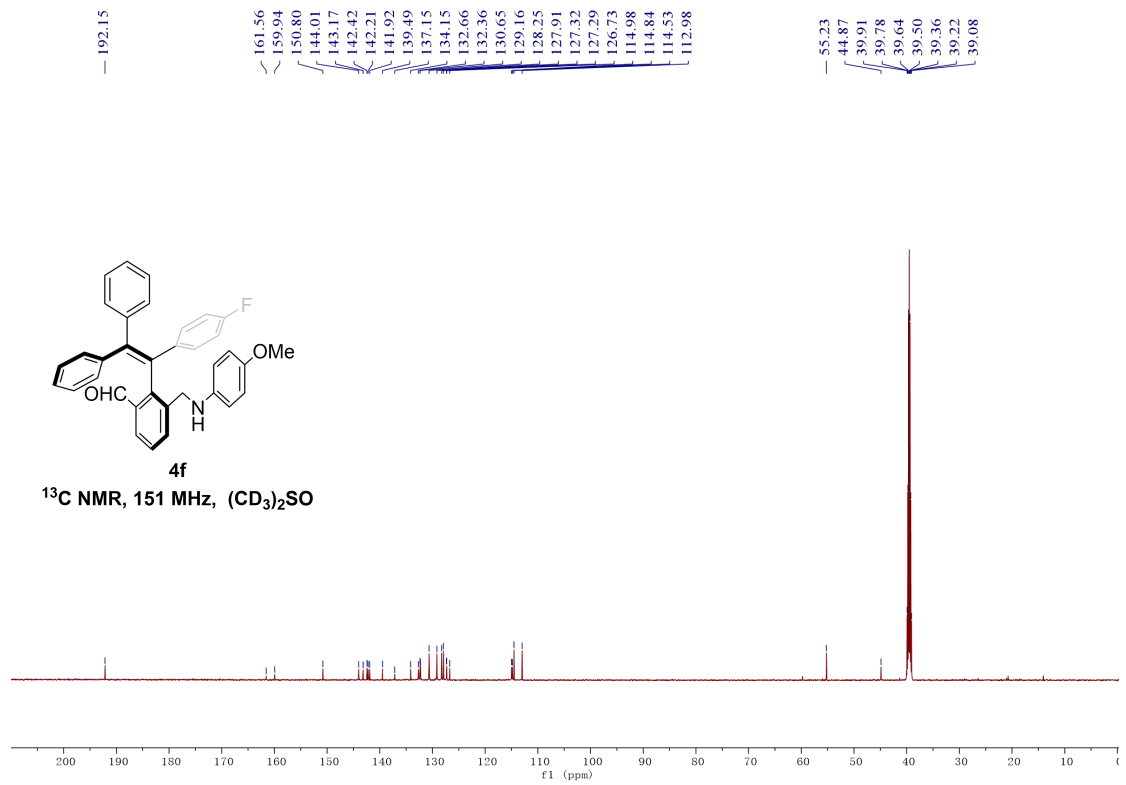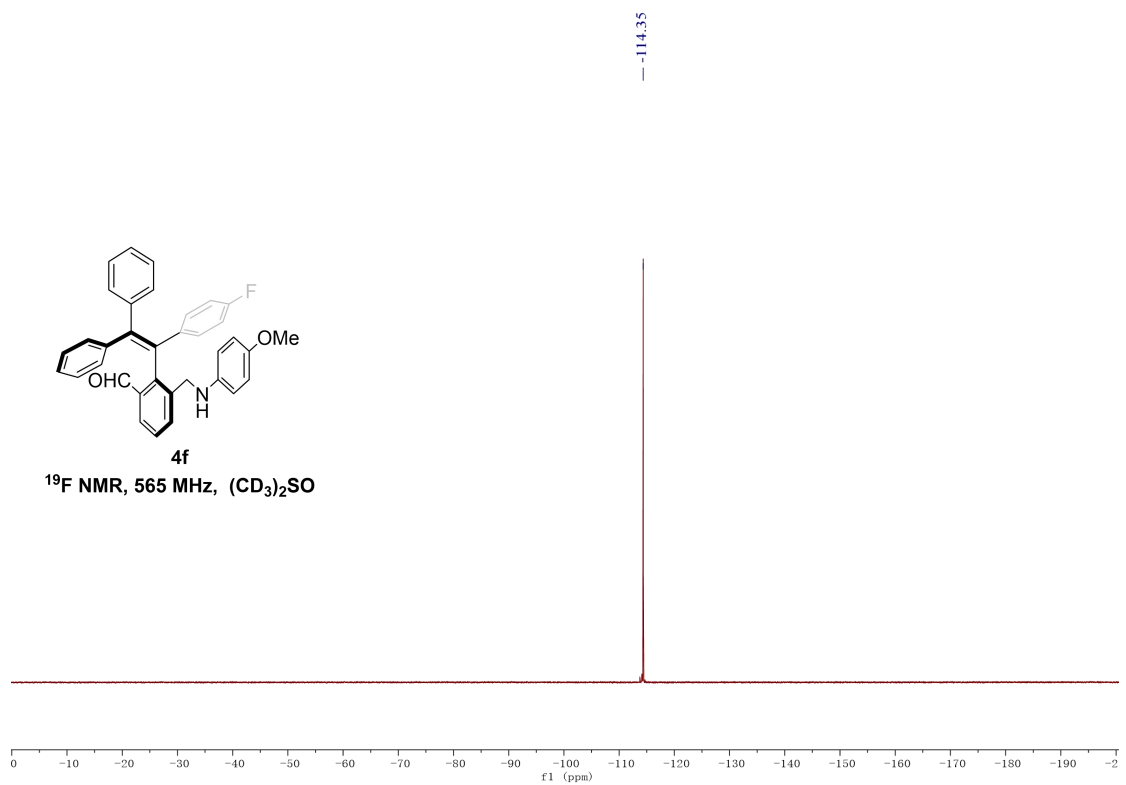



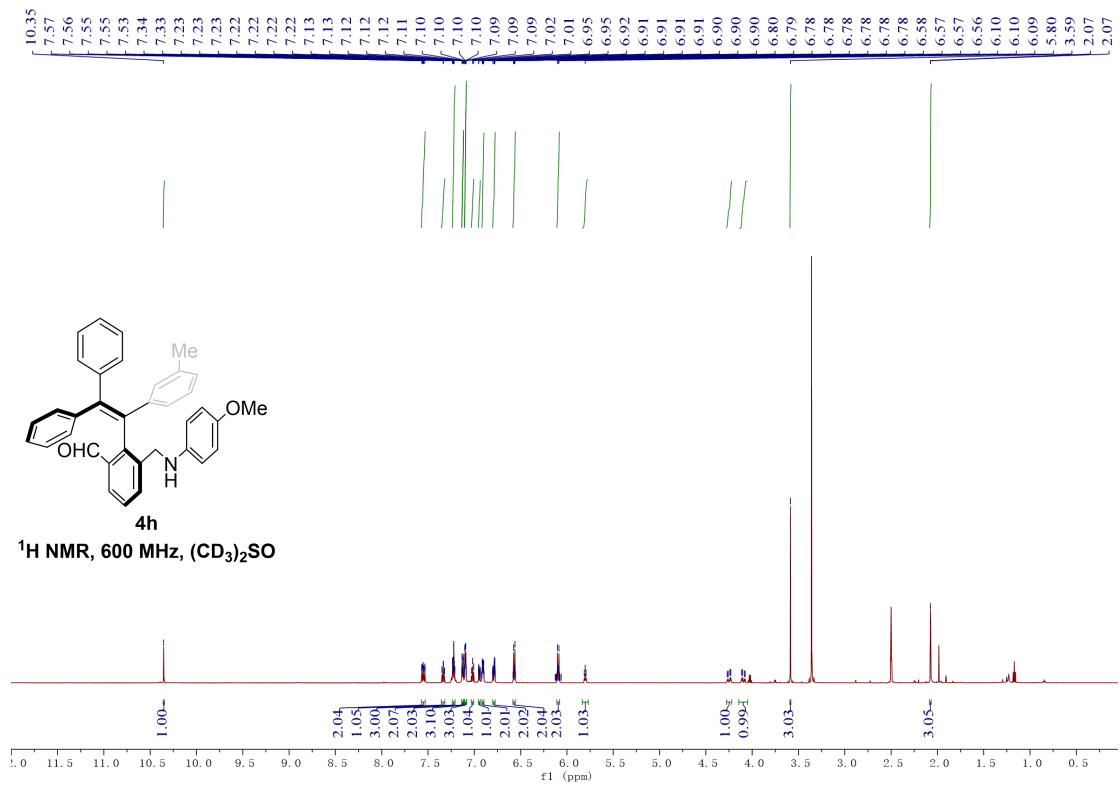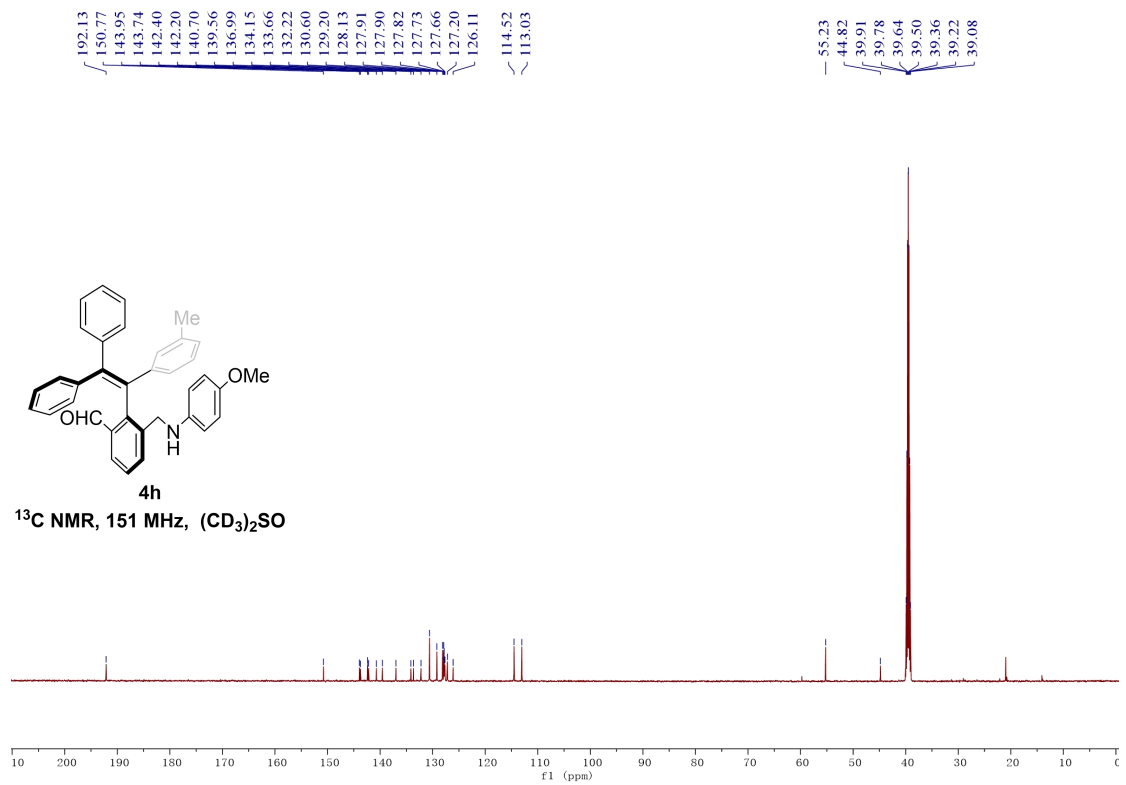

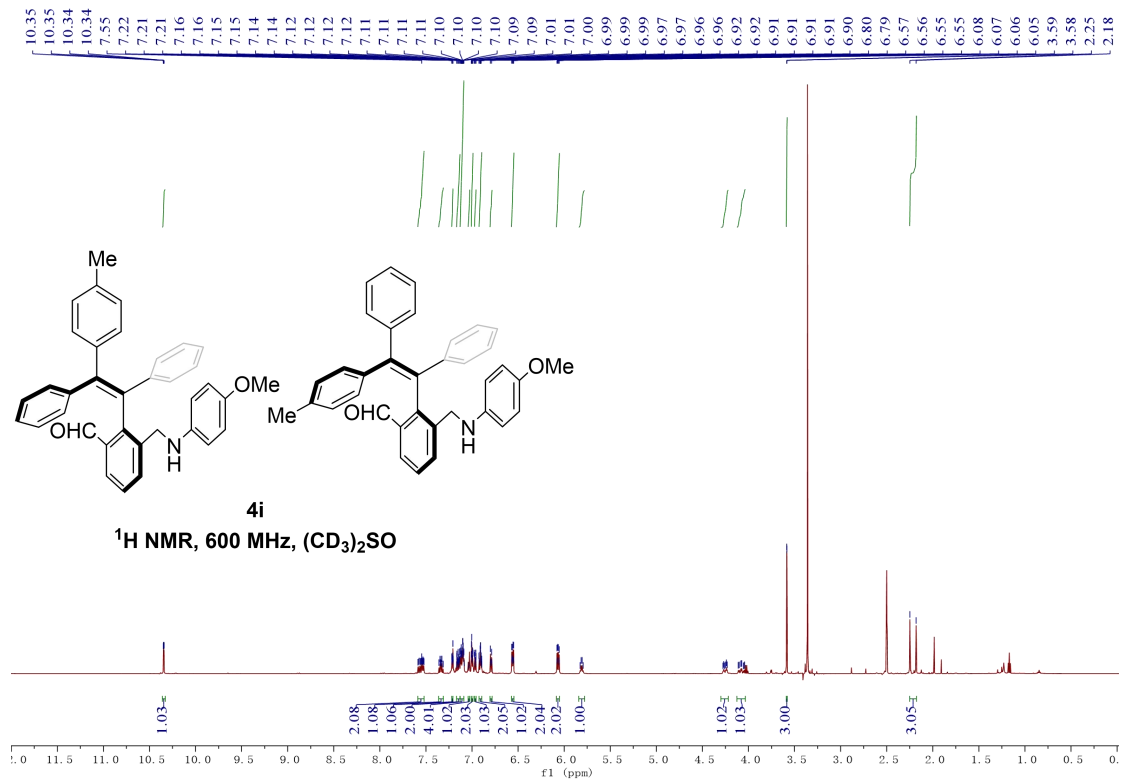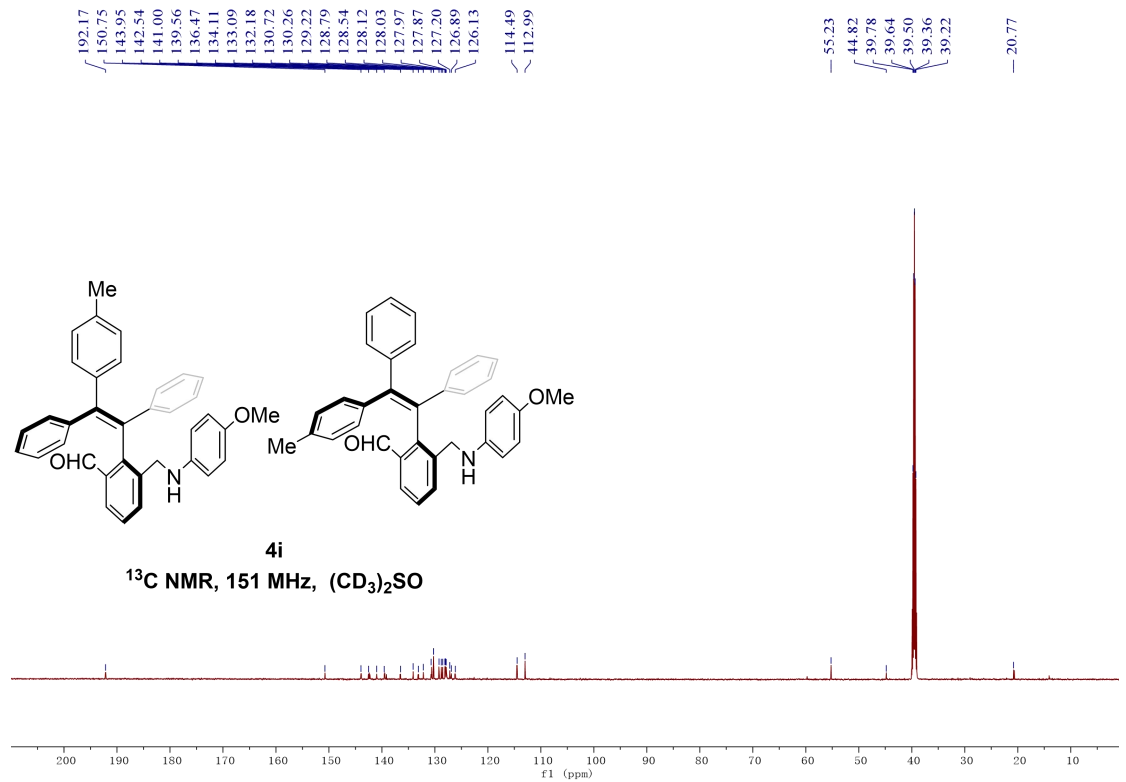

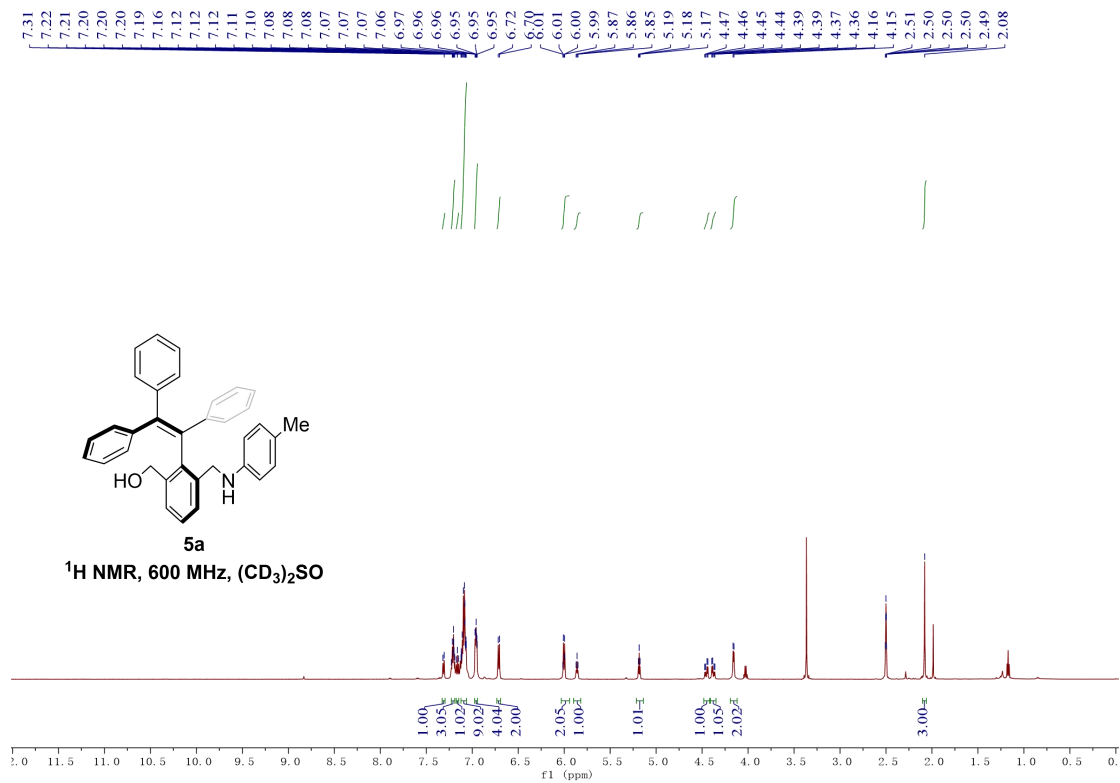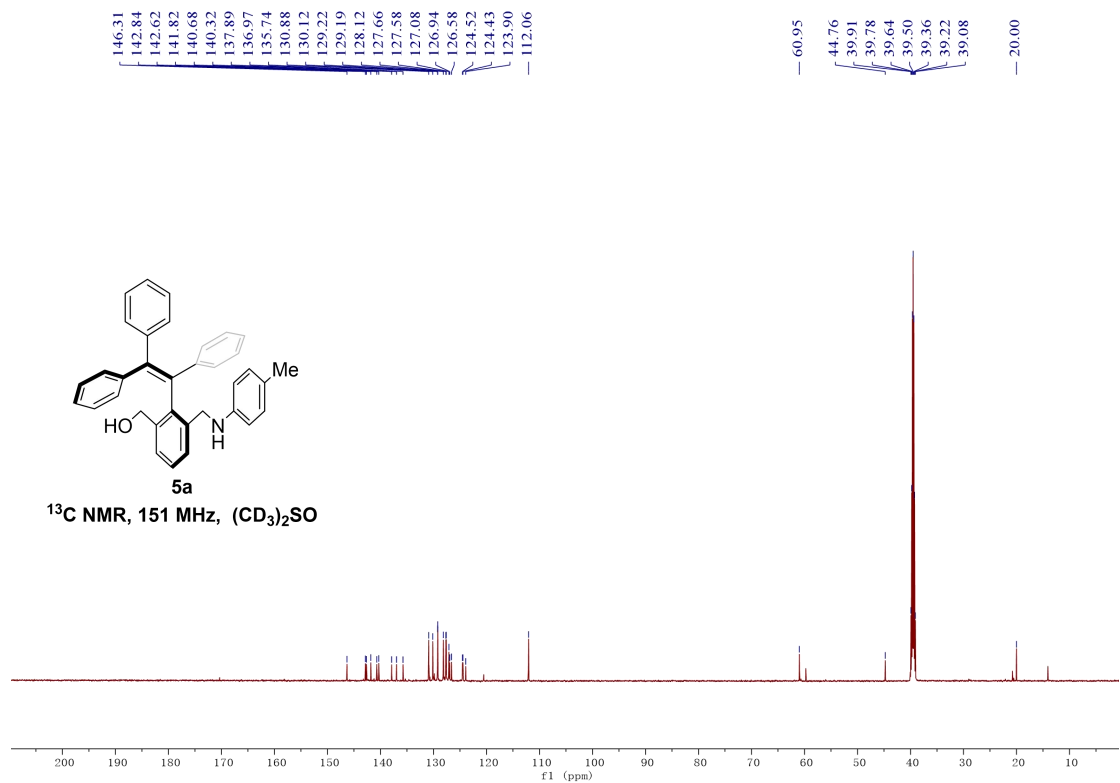

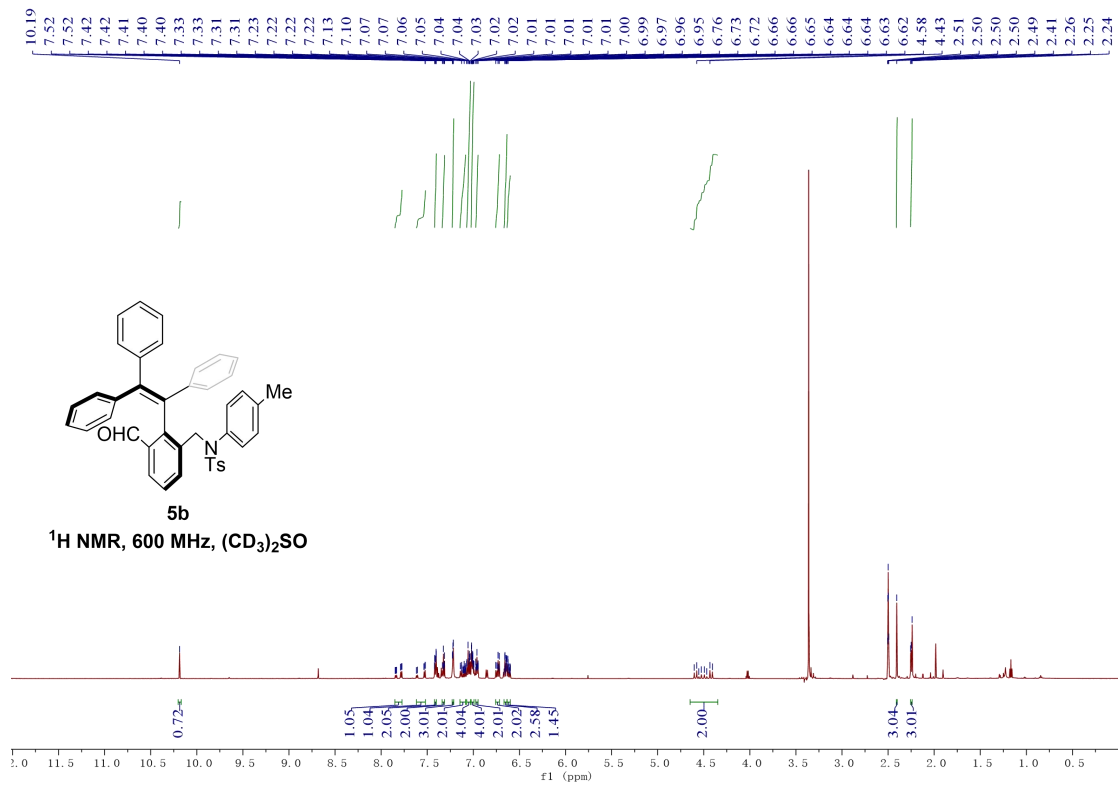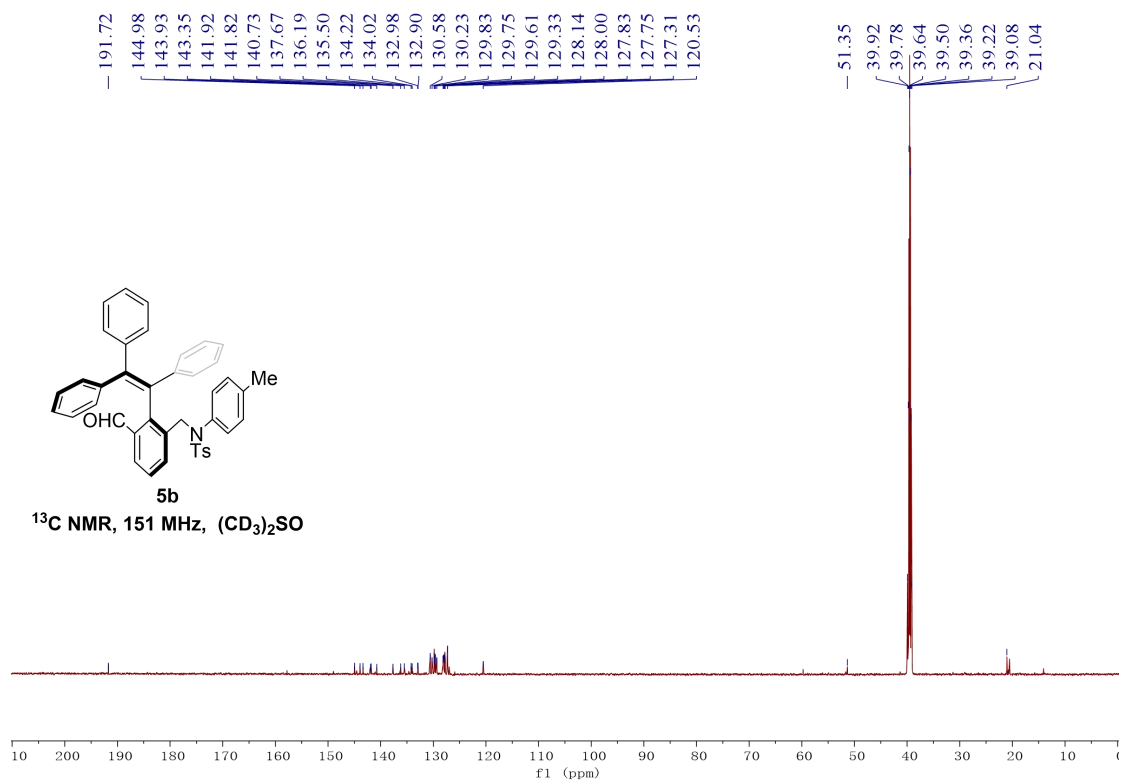

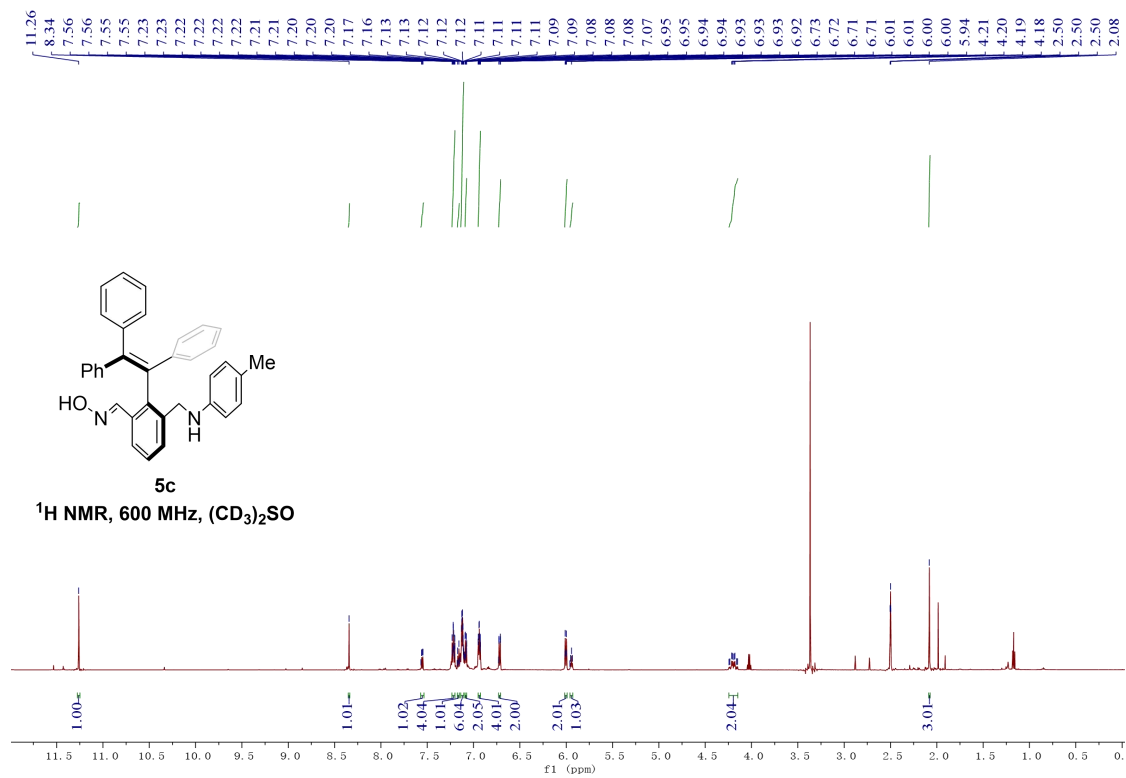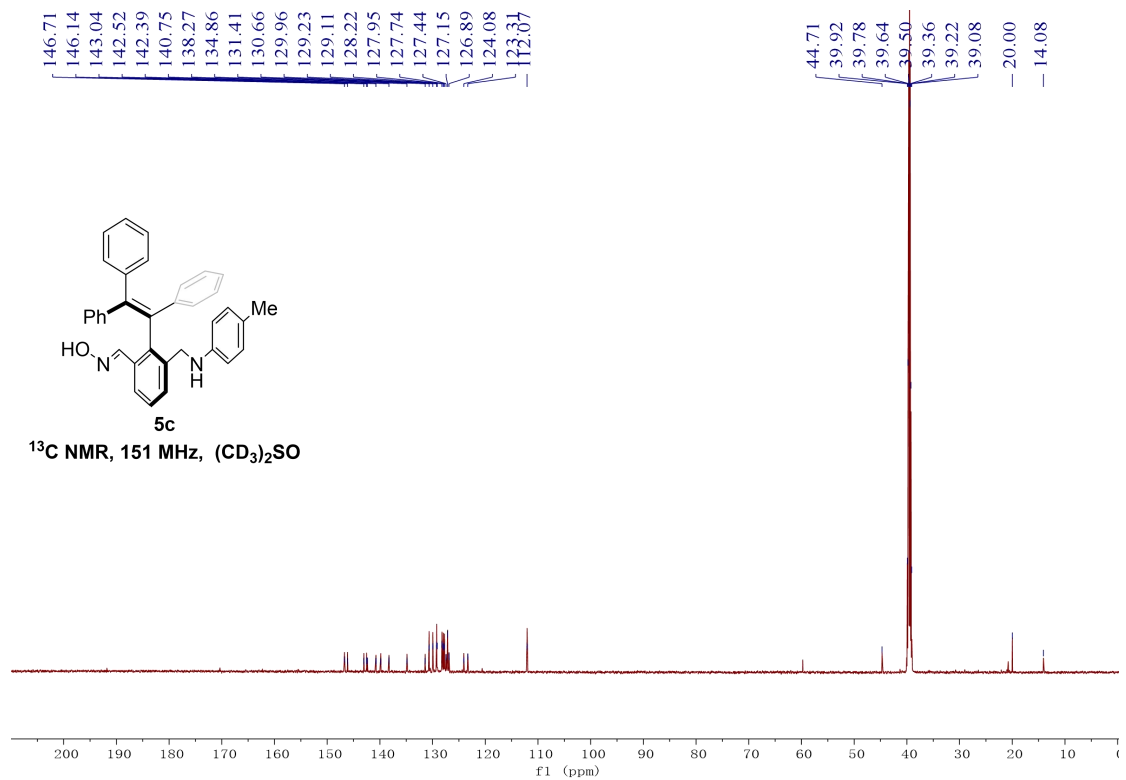

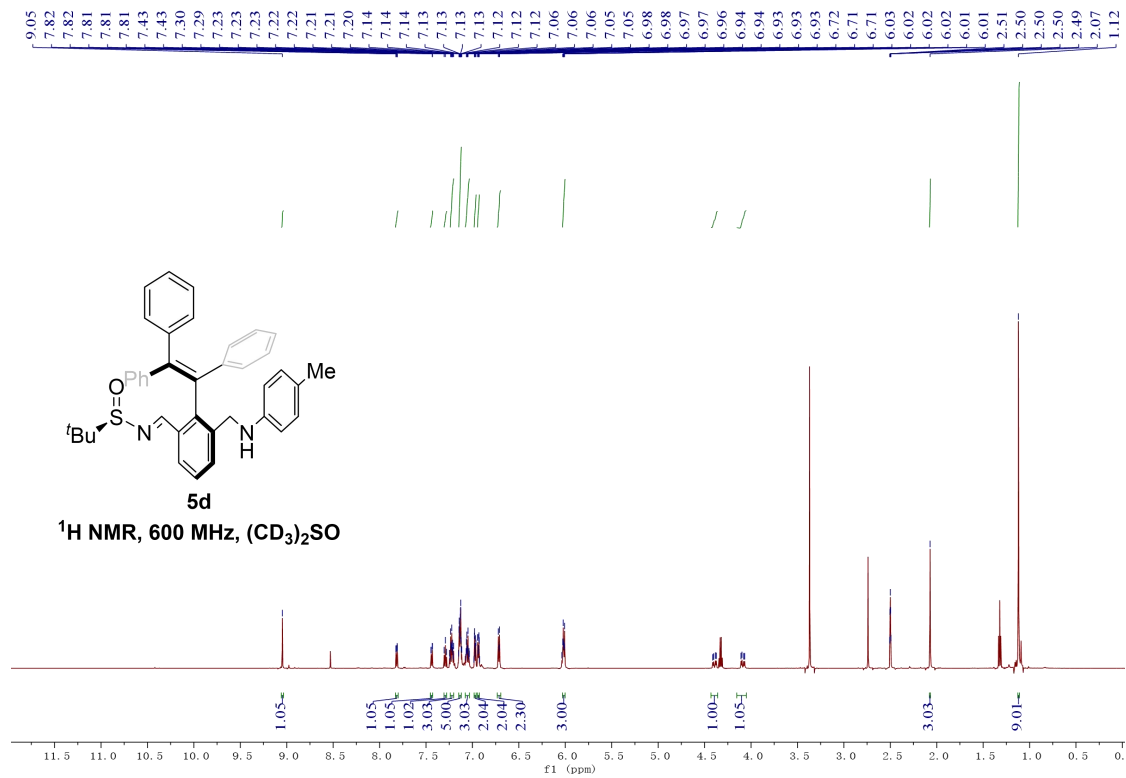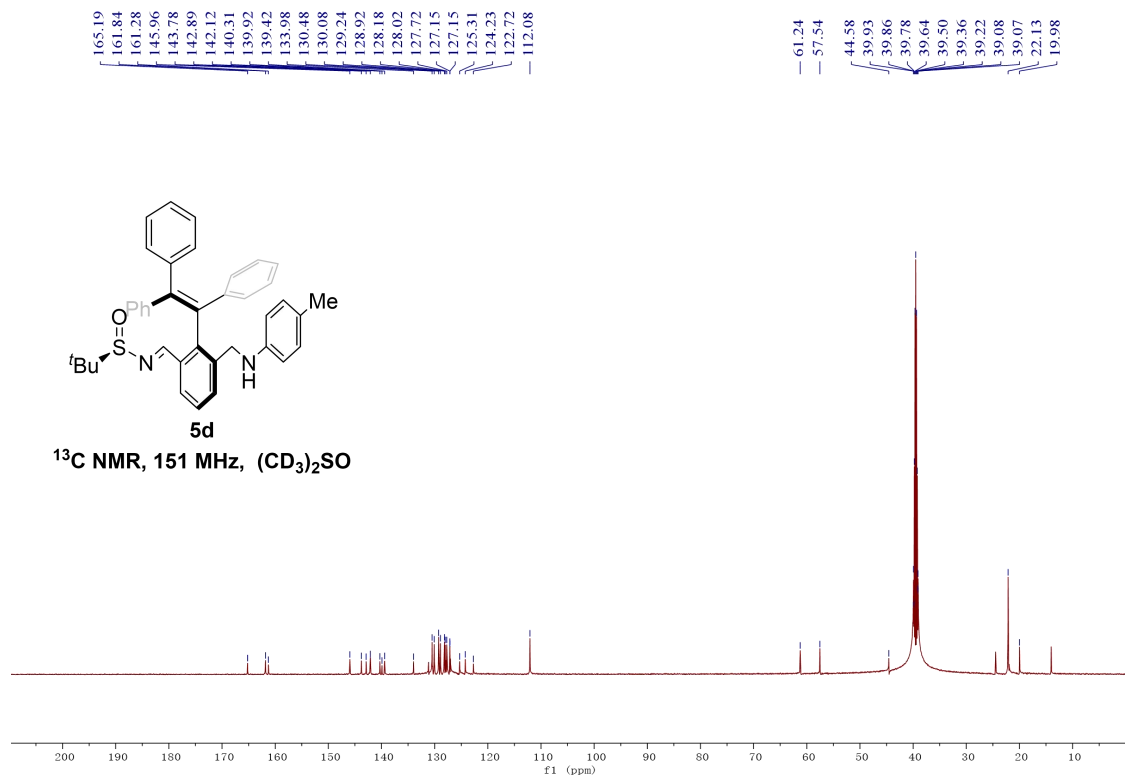

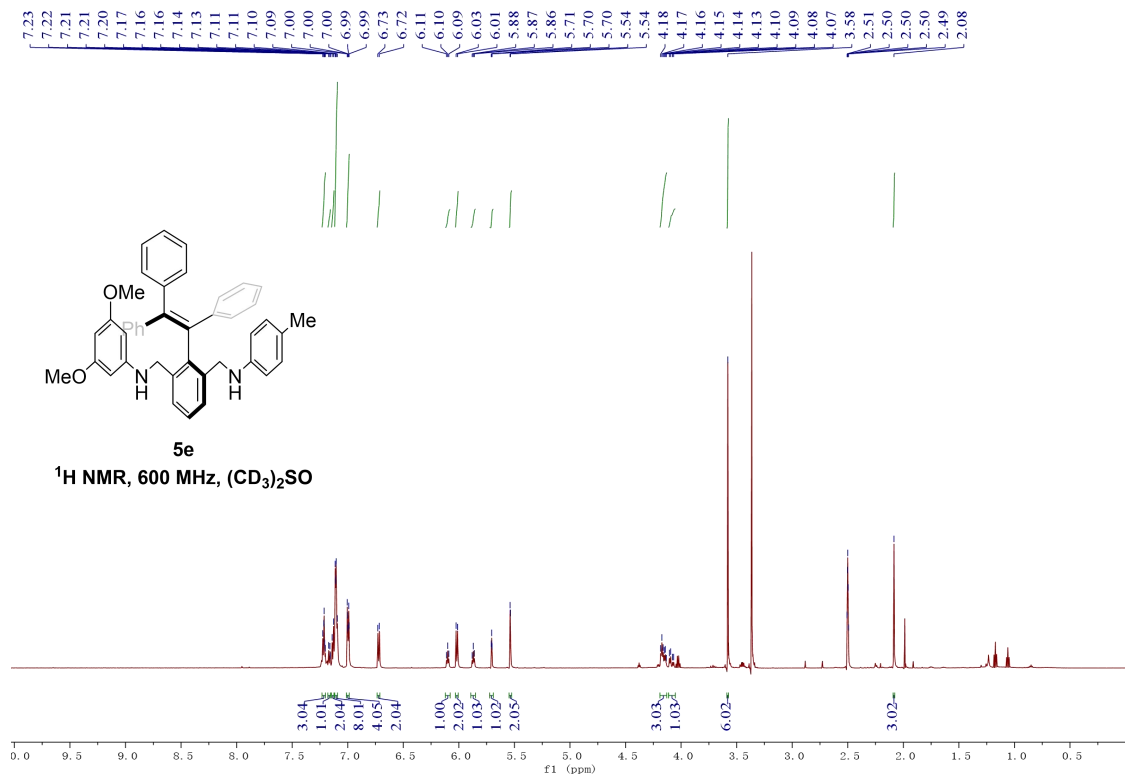

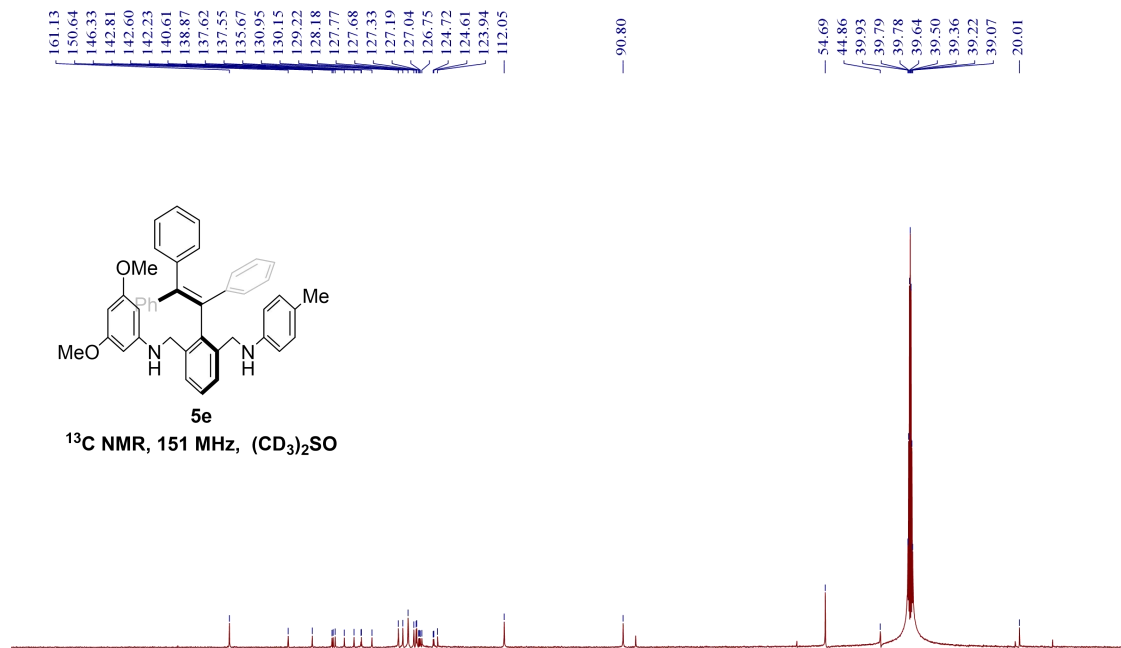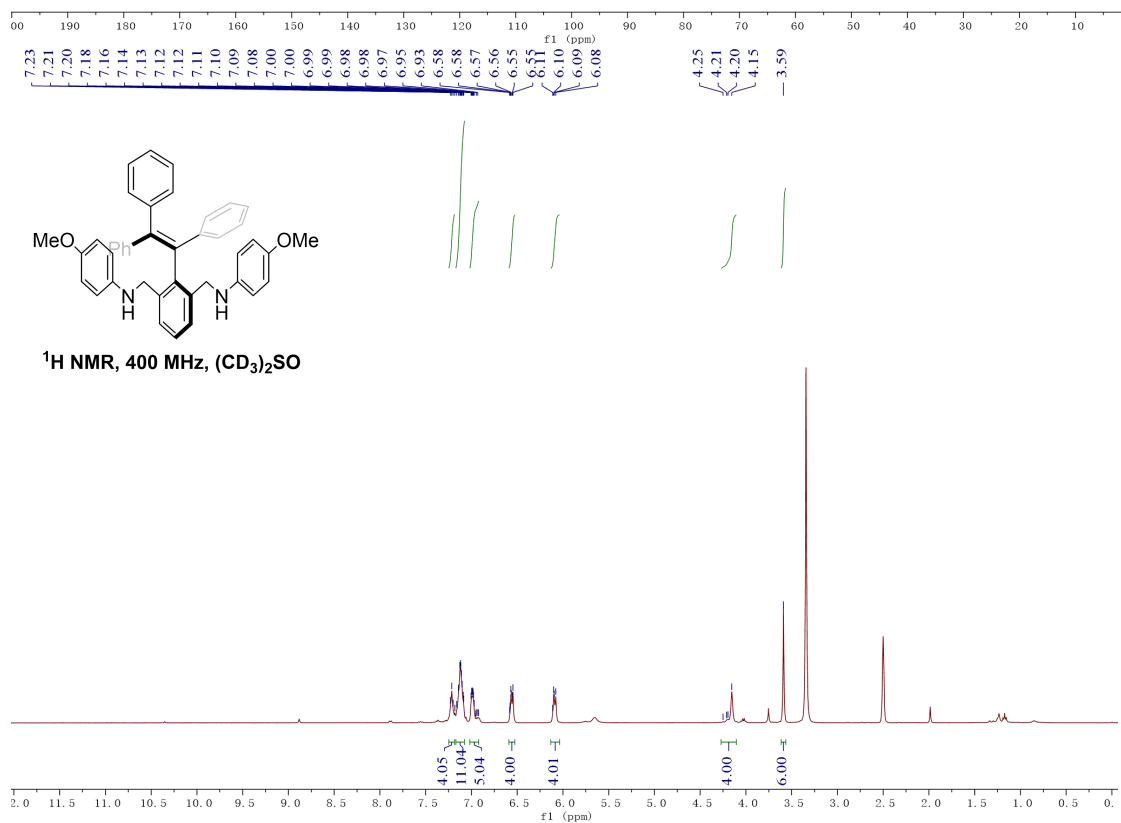

## 8. Copies of HPLC Spectras.

HPLC conditions: Chiralpak IA, 30% <sup>i</sup>PrOH/Hx eluent, 0.8 mL/min, 254 nm

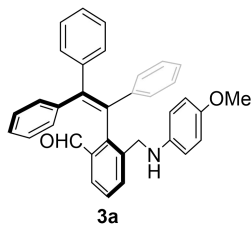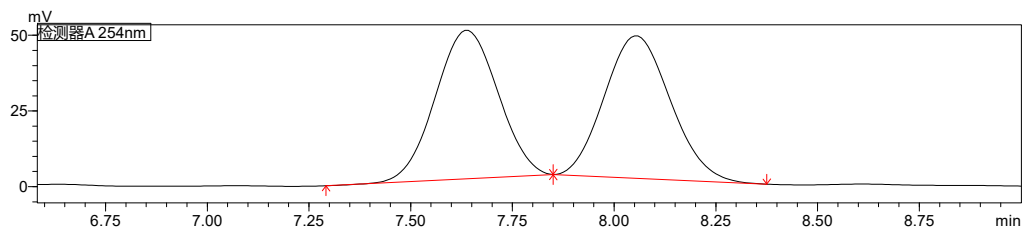

| Peak# | Ret. Time | Height | Area%  |
|-------|-----------|--------|--------|
| 1     | 7.637     | 49004  | 49.774 |
| 2     | 8.053     | 47049  | 50.226 |

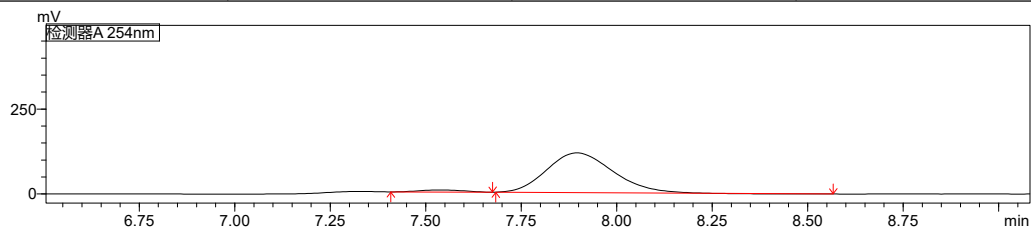

| Peak# | Ret. Time | Height | Area%  |
|-------|-----------|--------|--------|
| 1     | 7.539     | 6166   | 3.370  |
| 2     | 7.896     | 116886 | 96.630 |

HPLC conditions: Chiralpak OD-H, 20% <sup>i</sup>PrOH/Hx eluent, 0.5 mL/min, 254 nm

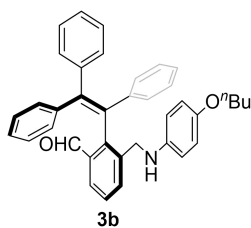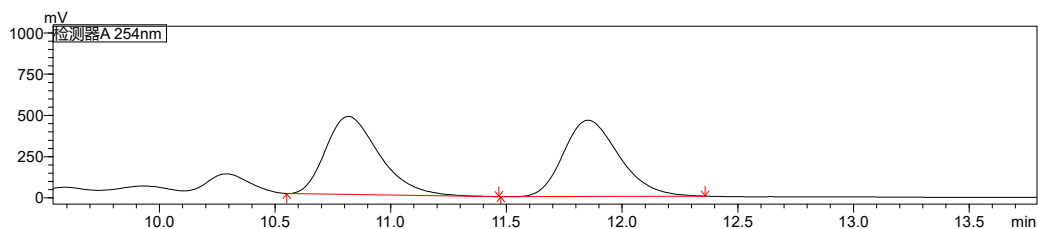

| Peak# | Ret. Time | Height | Area%  |
|-------|-----------|--------|--------|
| 1     | 10.817    | 473502 | 49.689 |
| 2     | 11.853    | 462368 | 50.311 |

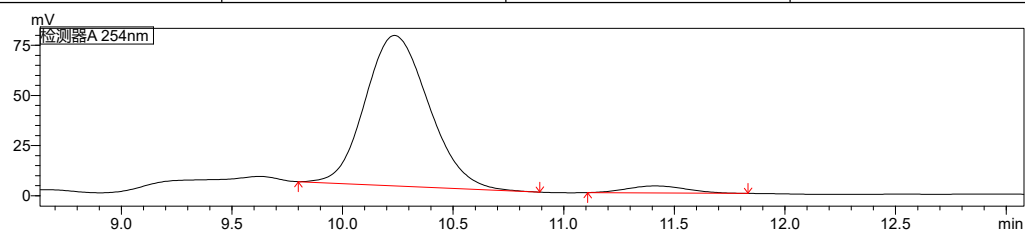

| Peak# | Ret. Time | Height | Area%  |
|-------|-----------|--------|--------|
| 1     | 10.235    | 75075  | 95.828 |
| 2     | 11.412    | 3500   | 4.172  |

HPLC conditions: Chiralpak IA, 30% *i*PrOH/Hx eluent, 0.8 mL/min, 254 nm

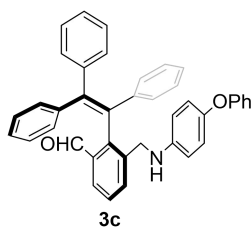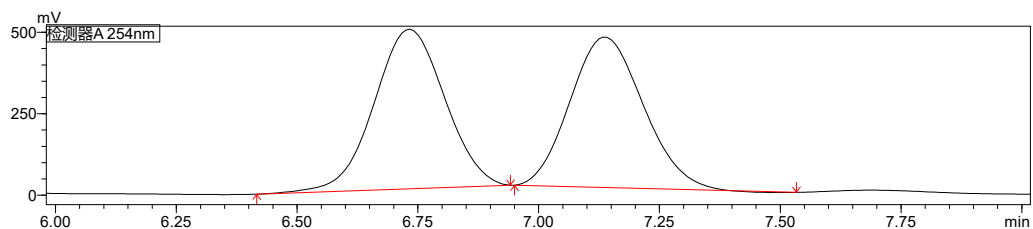

| Peak# | Ret. Time | Height | Area%  |
|-------|-----------|--------|--------|
| 1     | 6.732     | 489813 | 50.668 |
| 2     | 7.136     | 461398 | 49.332 |

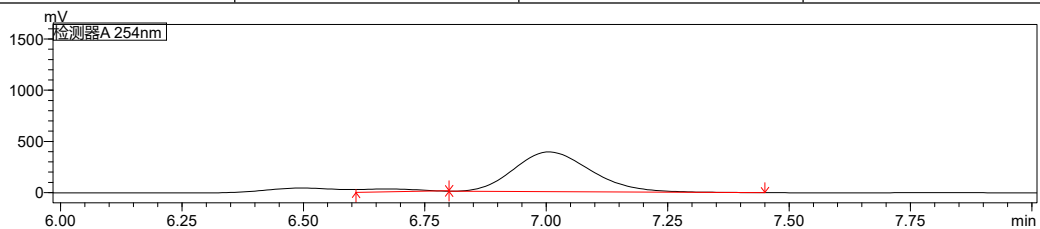

| Peak# | Ret. Time | Height | Area%  |
|-------|-----------|--------|--------|
| 1     | 6.674     | 28146  | 4.549  |
| 2     | 7.006     | 387927 | 95.451 |

HPLC conditions: Chiralpak IA, 20% *i*PrOH/Hx eluent, 0.5 mL/min, 254 nm

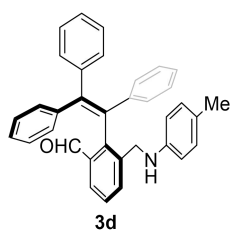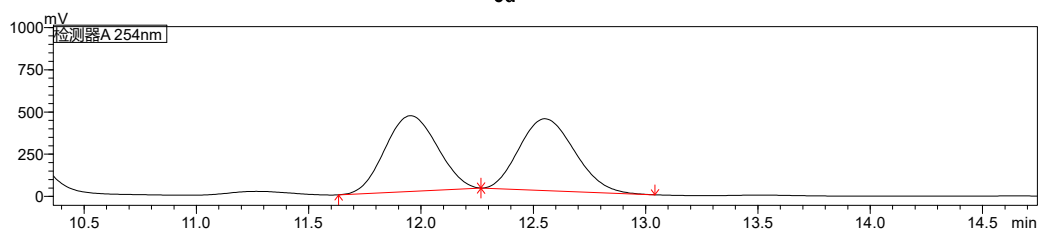

| Peak# | Ret. Time | Height | Area%  |
|-------|-----------|--------|--------|
| 1     | 11.953    | 448209 | 49.934 |
| 2     | 12.551    | 425045 | 50.066 |

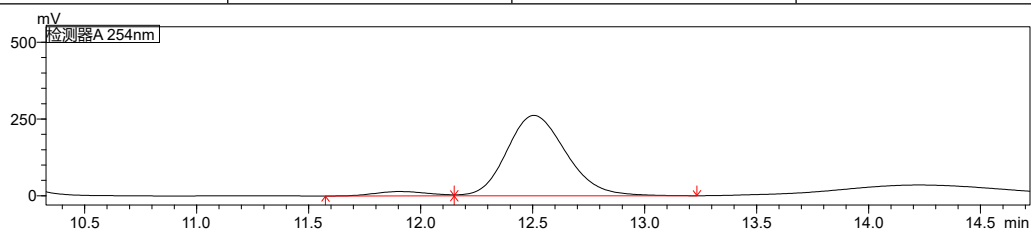

| Peak# | Ret. Time | Height | Area%  |
|-------|-----------|--------|--------|
| 1     | 11.908    | 14328  | 4.756  |
| 2     | 12.505    | 261912 | 95.244 |

HPLC conditions: Chiralpak OD-H, 20% *i*PrOH/Hx eluent, 0.5 mL/min, 254 nm

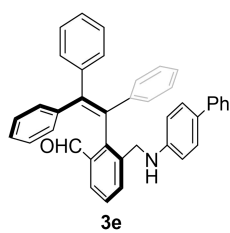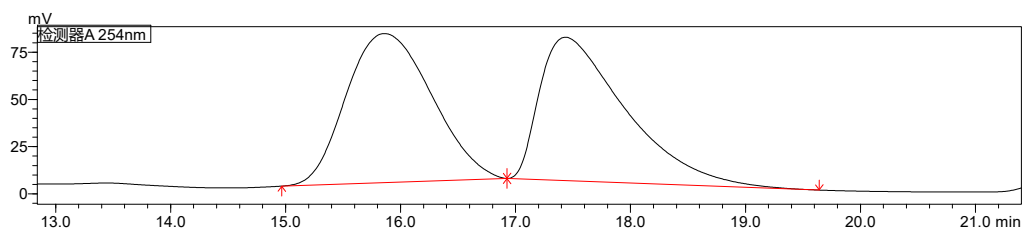

| Peak# | Ret. Time | Height | Area%  |
|-------|-----------|--------|--------|
| 1     | 15.861    | 78899  | 50.811 |
| 2     | 17.434    | 75926  | 49.189 |

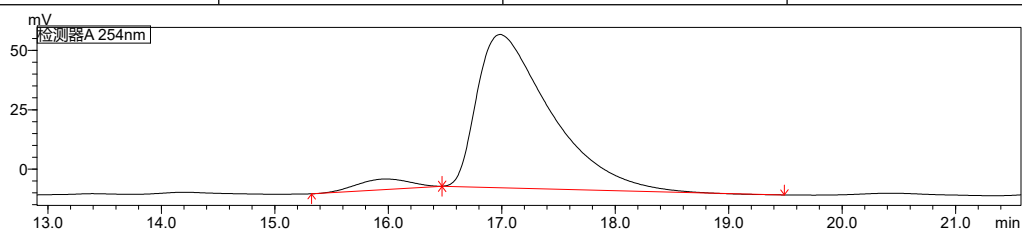

| Peak# | Ret. Time | Height | Area%  |
|-------|-----------|--------|--------|
| 1     | 15.982    | 4399   | 4.704  |
| 2     | 16.985    | 64558  | 95.296 |

HPLC conditions: Chiralpak IA, 30% *i*PrOH/Hx eluent, 0.8 mL/min, 254 nm

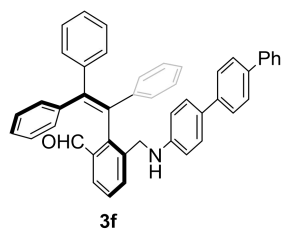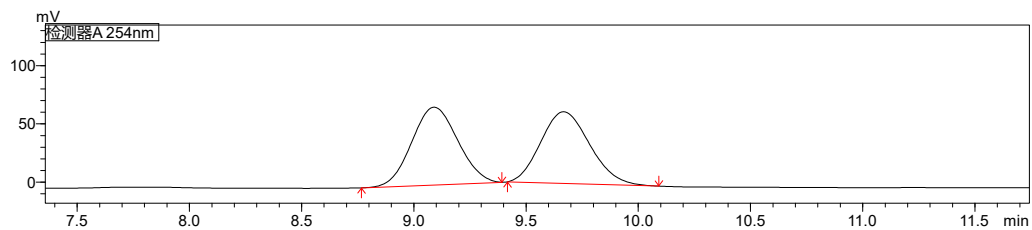

| Peak# | Ret. Time | Height | Area%  |
|-------|-----------|--------|--------|
| 1     | 9.090     | 66833  | 50.499 |
| 2     | 9.667     | 61550  | 49.501 |

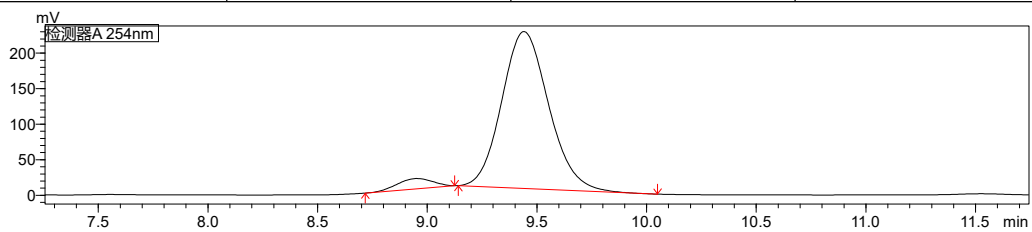

| Peak# | Ret. Time | Height | Area%  |
|-------|-----------|--------|--------|
| 1     | 8.952     | 14595  | 4.884  |
| 2     | 9.440     | 220973 | 95.116 |

HPLC conditions: Chiralpak AD-H, 20% iPrOH/Hx eluent, 0.5 mL/min, 254 nm

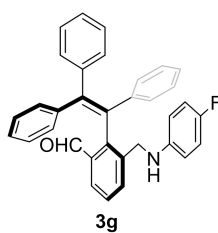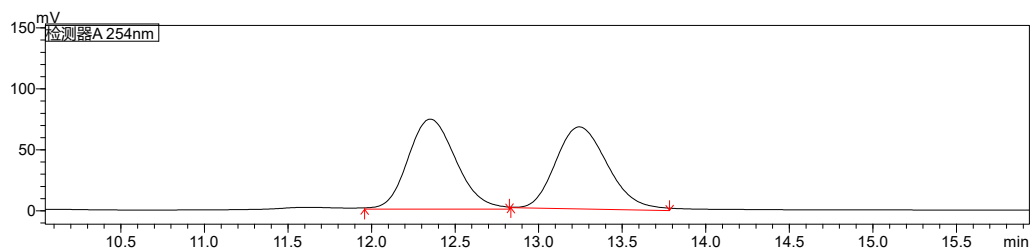

| Peak# | Ret. Time | Height | Area%  |
|-------|-----------|--------|--------|
| 1     | 12.351    | 72296  | 49.825 |
| 2     | 13.242    | 66400  | 50.175 |

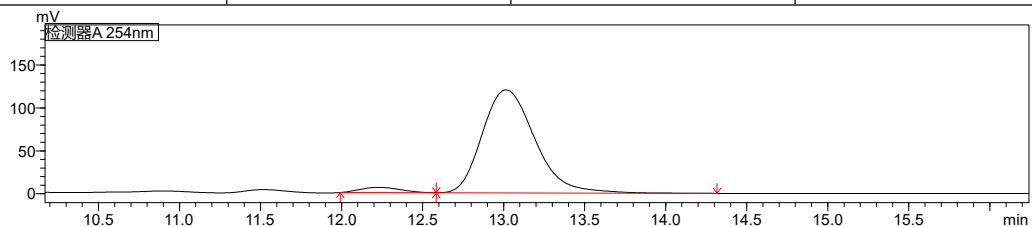

| Peak# | Ret. Time | Height | Area%  |
|-------|-----------|--------|--------|
| 1     | 12.227    | 6074   | 3.722  |
| 2     | 13.014    | 120030 | 96.278 |

HPLC conditions: Chiralpak IA, 20% *i*PrOH/Hx eluent, 0.5 mL/min, 254 nm

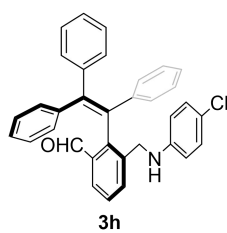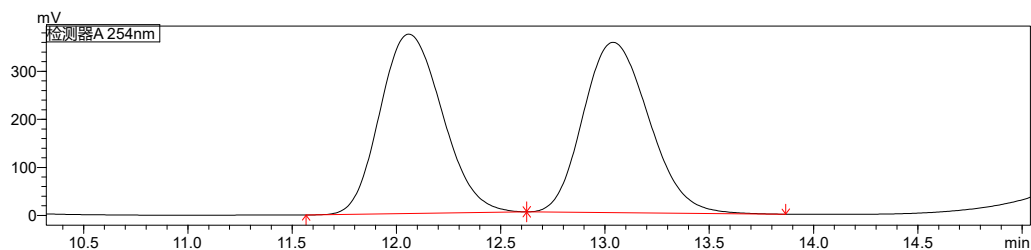

| Peak# | Ret. Time | Height | Area%  |
|-------|-----------|--------|--------|
| 1     | 12.059    | 373552 | 49.946 |
| 2     | 13.038    | 354652 | 50.054 |

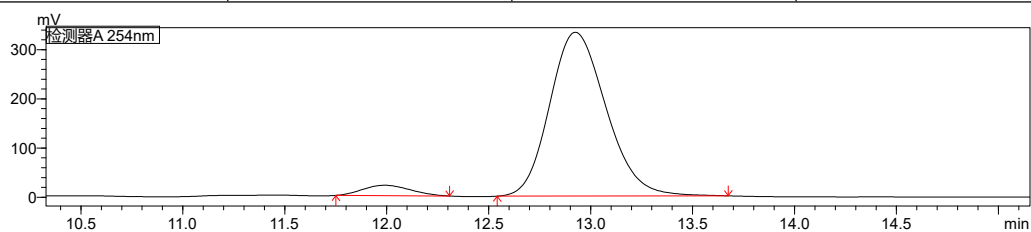

| Peak# | Ret. Time | Height | Area%  |
|-------|-----------|--------|--------|
| 1     | 11.988    | 21163  | 5.088  |
| 2     | 12.925    | 333062 | 94.912 |

HPLC conditions: Chiralpak IA, 20% *i*PrOH/Hx eluent, 0.5 mL/min, 254 nm

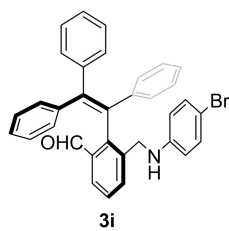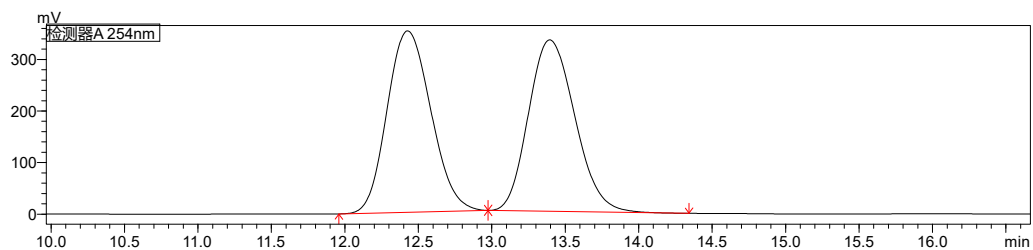

| Peak# | Ret. Time | Height | Area%  |
|-------|-----------|--------|--------|
| 1     | 12.426    | 352135 | 49.979 |
| 2     | 13.394    | 332663 | 50.021 |

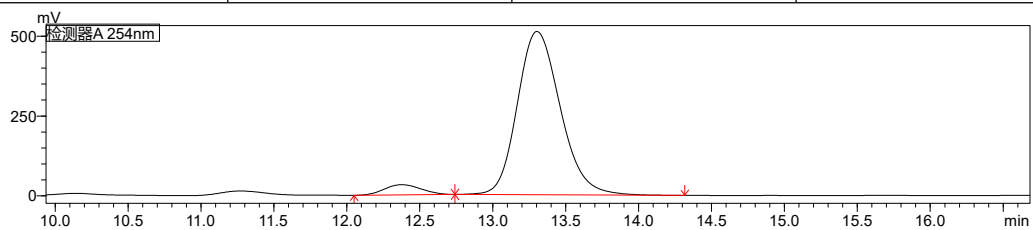

| Peak# | Ret. Time | Height | Area%  |
|-------|-----------|--------|--------|
| 1     | 12.376    | 31968  | 5.064  |
| 2     | 13.303    | 511511 | 94.936 |

HPLC conditions: Chiralpak OX-H, 20% *i*PrOH/Hx eluent, 0.5 mL/min, 254 nm

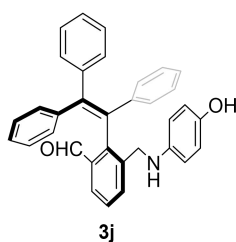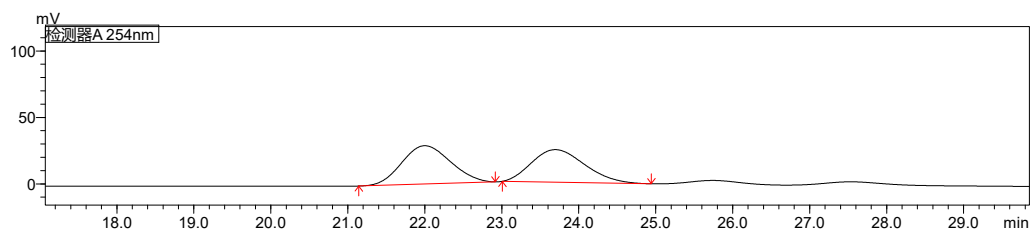

| Peak# | Ret. Time | Height | Area%  |
|-------|-----------|--------|--------|
| 1     | 22.000    | 28845  | 51.936 |
| 2     | 23.695    | 24483  | 48.064 |

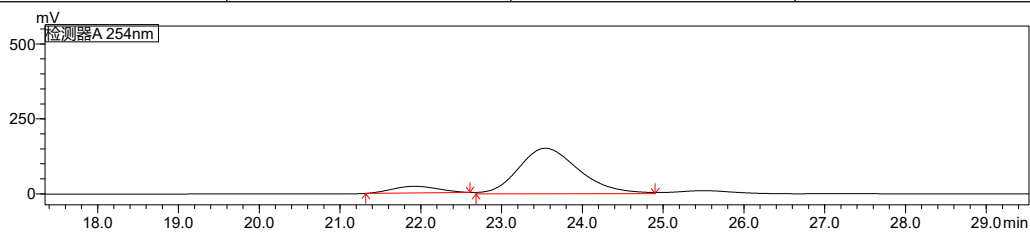

| Peak# | Ret. Time | Height | Area%  |
|-------|-----------|--------|--------|
| 1     | 21.920    | 22193  | 9.873  |
| 2     | 23.540    | 151910 | 90.127 |

HPLC conditions: Chiralpak AD-H, 20% iPrOH/Hx eluent, 0.5 mL/min, 254 nm

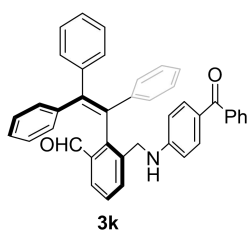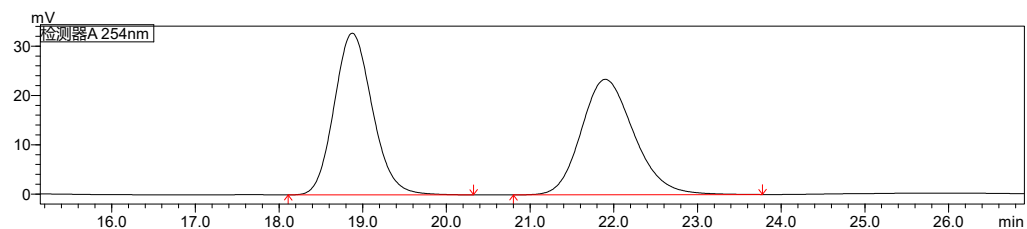

| Peak# | Ret. Time | Height | Area%  |
|-------|-----------|--------|--------|
| 1     | 18.875    | 32787  | 50.340 |
| 2     | 21.896    | 23411  | 49.660 |

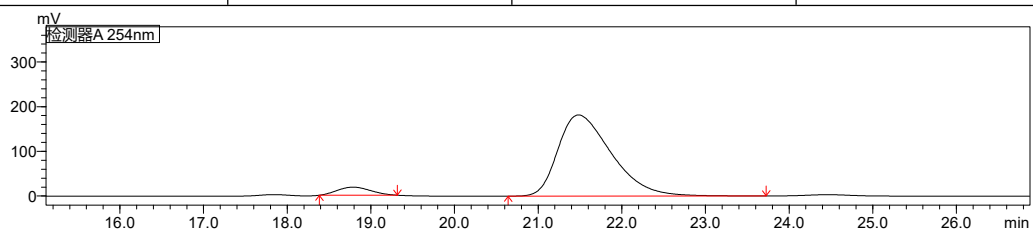

| Peak# | Ret. Time | Height | Area%  |
|-------|-----------|--------|--------|
| 1     | 18.785    | 18066  | 5.841  |
| 2     | 21.483    | 181517 | 94.159 |

HPLC conditions: Chiralpak OX-H, 20% *i*PrOH/Hx eluent, 0.5 mL/min, 254 nm

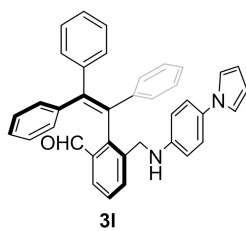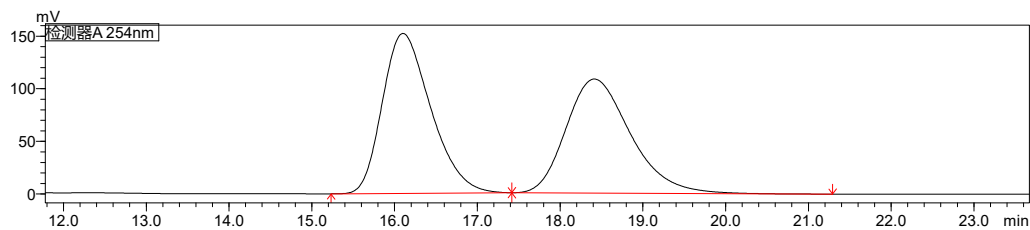

| Peak# | Ret. Time | Height | Area%  |
|-------|-----------|--------|--------|
| 1     | 16.101    | 151957 | 51.317 |
| 2     | 18.413    | 108359 | 48.683 |

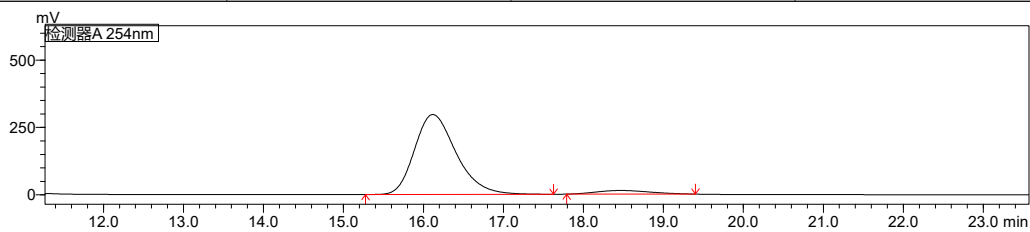

| Peak# | Ret. Time | Height | Area%  |
|-------|-----------|--------|--------|
| 1     | 16.117    | 296711 | 94.445 |
| 2     | 18.464    | 13489  | 5.555  |

HPLC conditions: Chiralpak AD-H, 20% iPrOH/Hx eluent, 0.5 mL/min, 254 nm

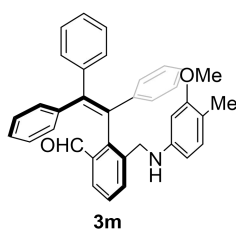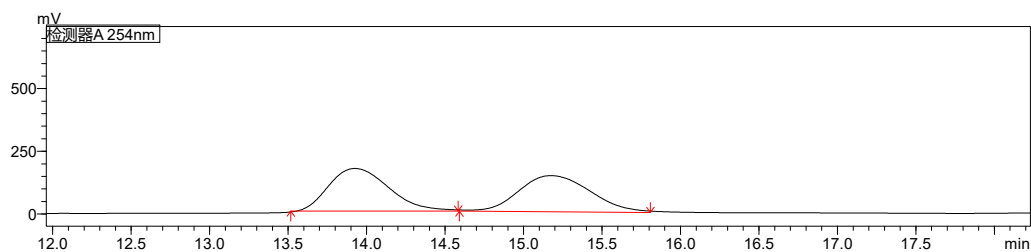

| Peak# | Ret. Time | Height | Area%  |
|-------|-----------|--------|--------|
| 1     | 13.924    | 169549 | 49.635 |
| 2     | 15.174    | 143871 | 50.365 |

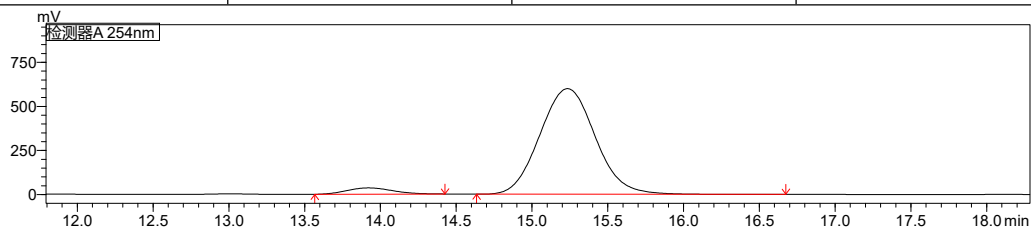

| Peak# | Ret. Time | Height | Area%  |
|-------|-----------|--------|--------|
| 1     | 13.921    | 35526  | 4.649  |
| 2     | 15.235    | 599132 | 95.351 |

HPLC conditions: Chiralpak IA-H, 20% <sup>i</sup>PrOH/Hx eluent, 0.5 mL/min, 254 nm

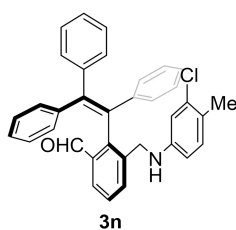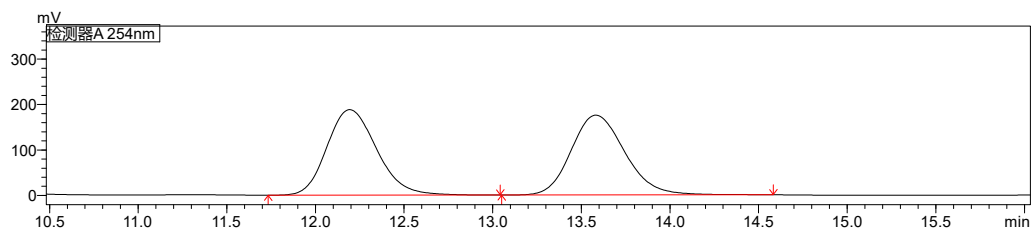

| Peak# | Ret. Time | Height | Area%  |
|-------|-----------|--------|--------|
| 1     | 12.193    | 188167 | 49.824 |
| 2     | 13.582    | 175682 | 50.176 |

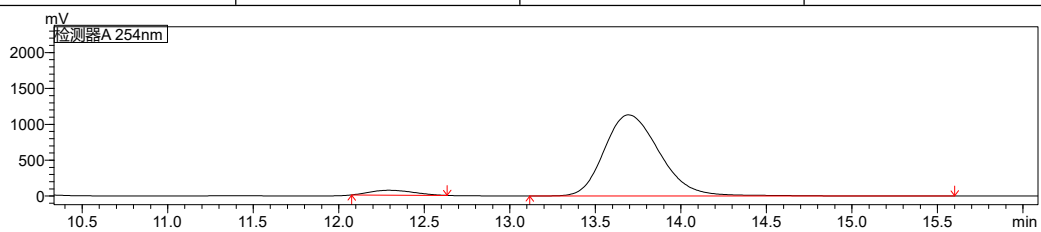

| Peak# | Ret. Time | Height  | Area%  |
|-------|-----------|---------|--------|
| 1     | 12.293    | 67341   | 4.470  |
| 2     | 13.694    | 1130061 | 95.530 |

HPLC conditions: Chiralpak OX-H, 20% *i*PrOH/Hx eluent, 0.5 mL/min, 254 nm

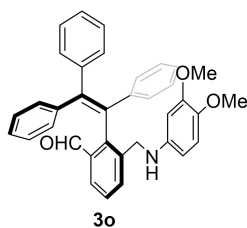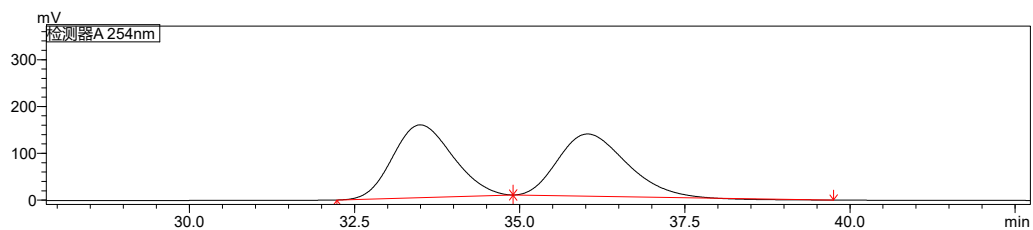

| Peak# | Ret. Time | Height | Area%  |
|-------|-----------|--------|--------|
| 1     | 33.492    | 155488 | 50.768 |
| 2     | 36.028    | 132800 | 49.232 |

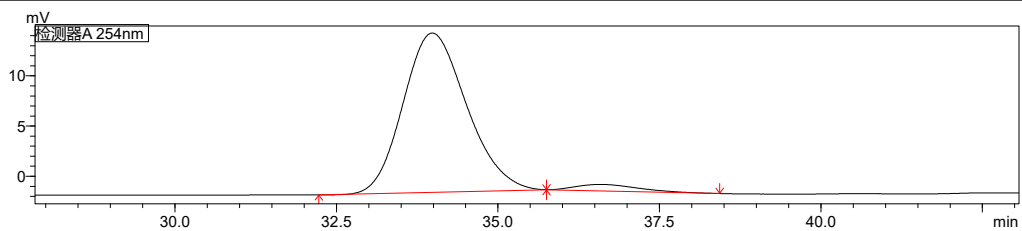

| Peak# | Ret. Time | Height | Area%  |
|-------|-----------|--------|--------|
| 1     | 33.981    | 15860  | 96.163 |
| 2     | 36.595    | 646    | 3.837  |

HPLC conditions: Chiralpak IA, 30% *i*PrOH/Hx eluent, 0.8 mL/min, 254 nm

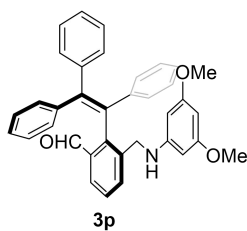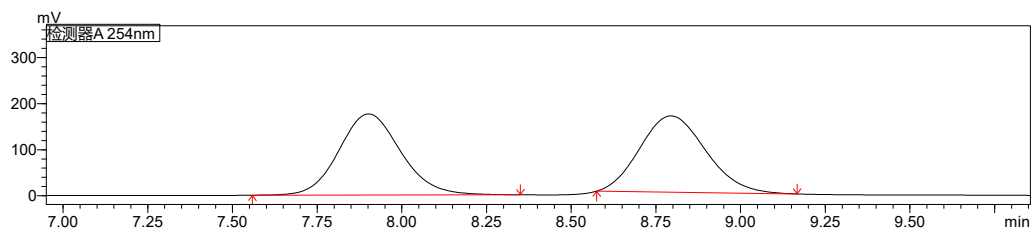

| Peak# | Ret. Time | Height | Area%  |
|-------|-----------|--------|--------|
| 1     | 7.901     | 176370 | 49.948 |
| 2     | 8.794     | 165760 | 50.052 |

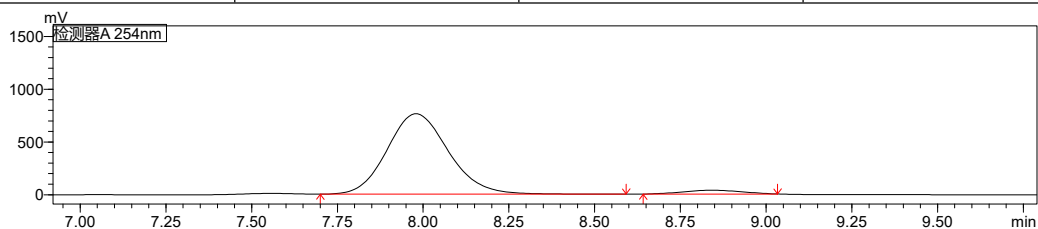

| Peak# | Ret. Time | Height | Area%  |
|-------|-----------|--------|--------|
| 1     | 7.979     | 762140 | 95.721 |
| 2     | 8.843     | 35669  | 4.279  |

HPLC conditions: Chiralpak IA, 20% *i*PrOH/Hx eluent, 0.5 mL/min, 254 nm

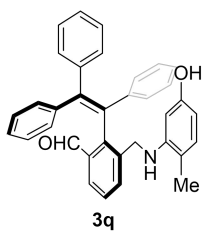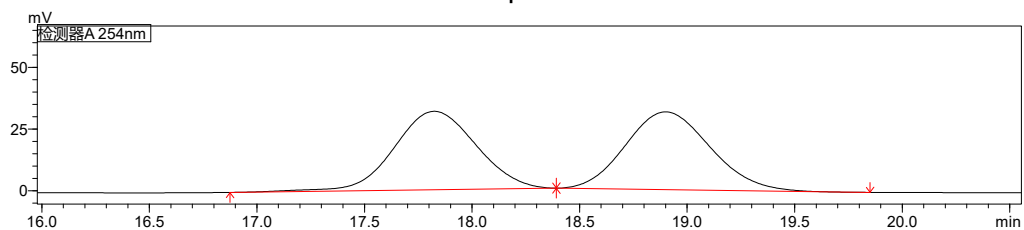

| Peak# | Ret. Time | Height | Area%  |
|-------|-----------|--------|--------|
| 1     | 17.824    | 31825  | 49.459 |
| 2     | 18.899    | 31536  | 50.541 |

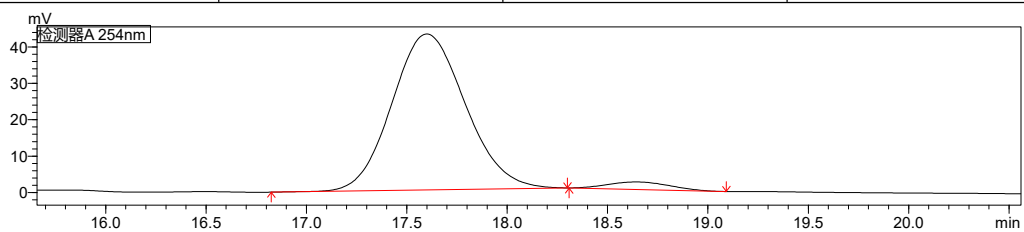

| Peak# | Ret. Time | Height | Area%  |
|-------|-----------|--------|--------|
| 1     | 17.600    | 42883  | 96.141 |
| 2     | 18.642    | 2055   | 3.859  |

HPLC conditions: Chiralpak IC, 20% *i*PrOH/Hx eluent, 0.5 mL/min, 254 nm

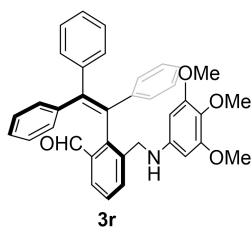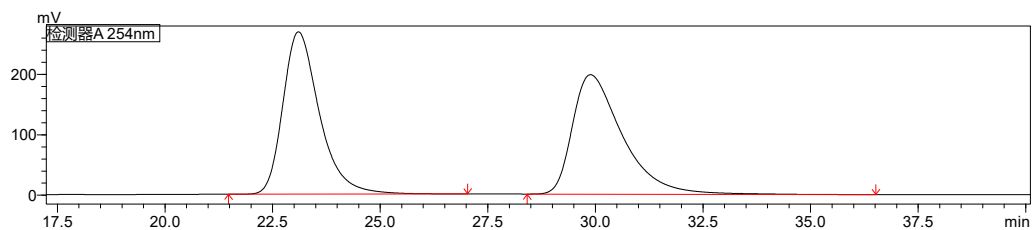

| Peak# | Ret. Time | Height | Area%  |
|-------|-----------|--------|--------|
| 1     | 23.100    | 268641 | 49.831 |
| 2     | 29.888    | 197728 | 50.169 |

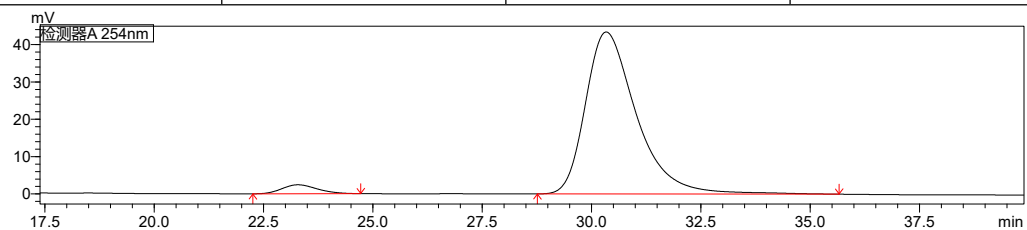

| Peak# | Ret. Time | Height | Area%  |
|-------|-----------|--------|--------|
| 1     | 23.286    | 2404   | 3.700  |
| 2     | 30.333    | 43387  | 96.300 |

HPLC conditions: Chiralpak IA, 20% *i*PrOH/Hx eluent, 0.5 mL/min, 254 nm

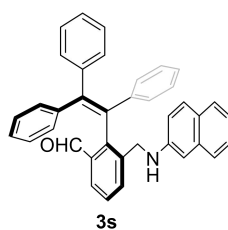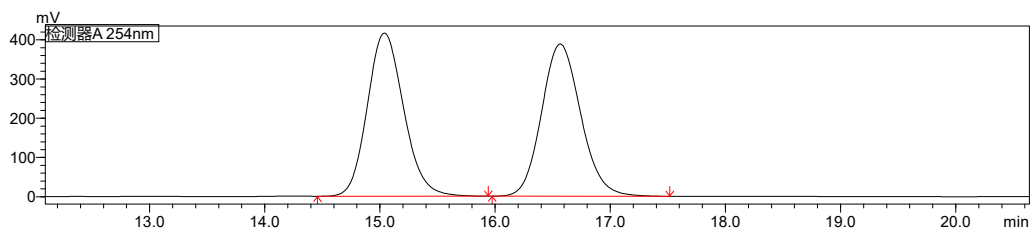

| Peak# | Ret. Time | Height | Area%  |
|-------|-----------|--------|--------|
| 1     | 15.038    | 415859 | 49.879 |
| 2     | 16.565    | 388222 | 50.121 |

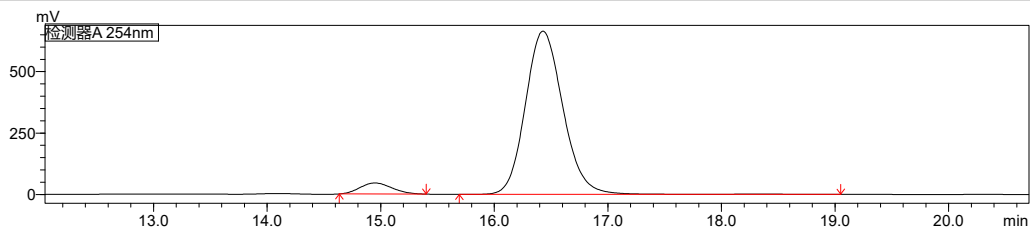

| Peak# | Ret. Time | Height | Area%  |
|-------|-----------|--------|--------|
| 1     | 14.948    | 44859  | 5.430  |
| 2     | 16.428    | 664316 | 94.570 |

HPLC conditions: Chiralpak OD-H, 20% *i*PrOH/Hx eluent, 0.5 mL/min, 254 nm

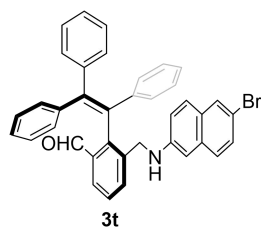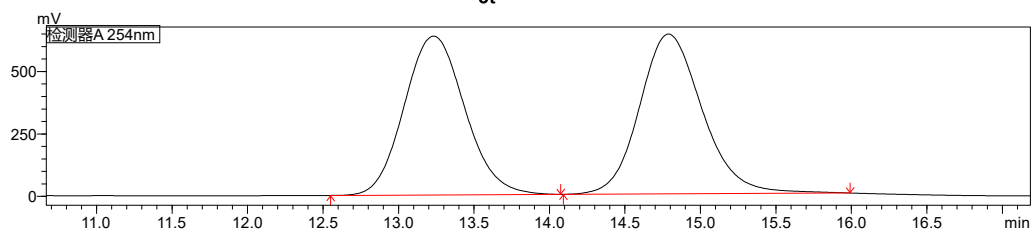

| Peak# | Ret. Time | Height | Area%  |
|-------|-----------|--------|--------|
| 1     | 13.232    | 636174 | 48.985 |
| 2     | 14.788    | 639820 | 51.015 |

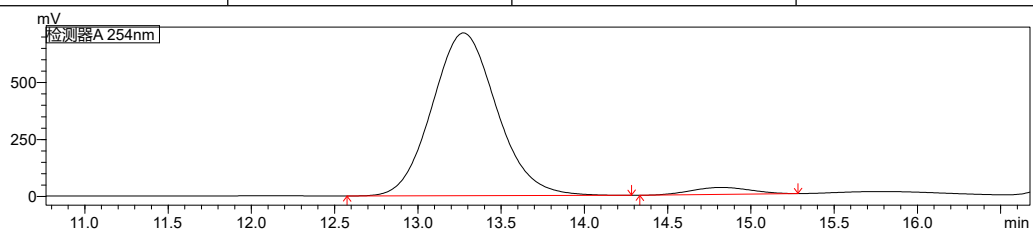

| Peak# | Ret. Time | Height | Area%  |
|-------|-----------|--------|--------|
| 1     | 13.274    | 714431 | 96.194 |
| 2     | 14.821    | 30563  | 3.806  |

HPLC conditions: Chiralpak IA, 20% iPrOH/Hx eluent, 0.5 mL/min, 254 nm

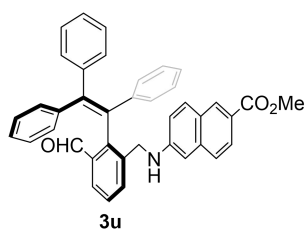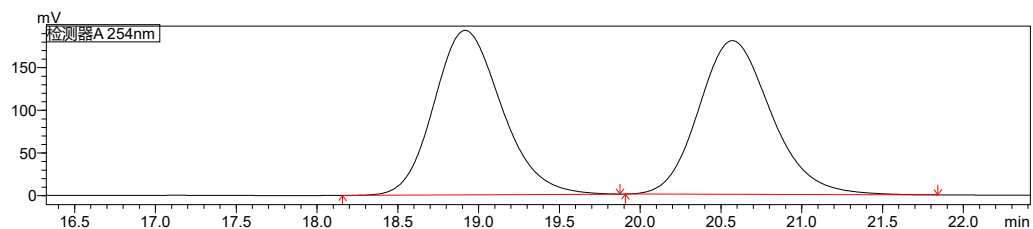

| Peak# | Ret. Time | Height | Area%  |
|-------|-----------|--------|--------|
| 1     | 18.917    | 192830 | 50.006 |
| 2     | 20.571    | 180099 | 49.994 |

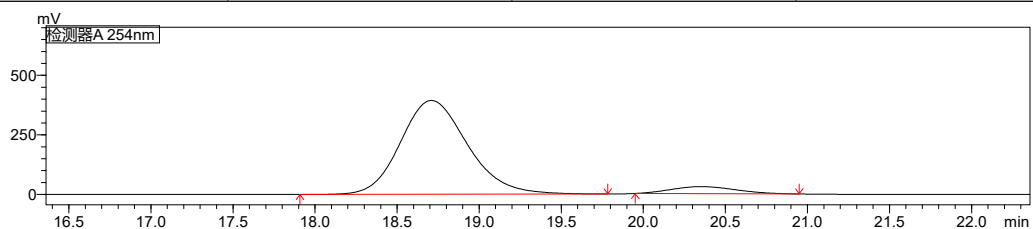

| Peak# | Ret. Time | Height | Area%  |
|-------|-----------|--------|--------|
| 1     | 18.709    | 394322 | 93.253 |
| 2     | 20.352    | 29634  | 6.747  |

HPLC conditions: Chiralpak OD-H, 20% *i*PrOH/Hx eluent, 0.5 mL/min, 254 nm

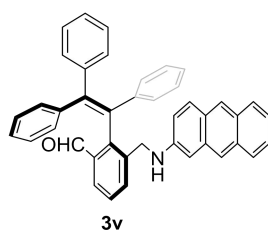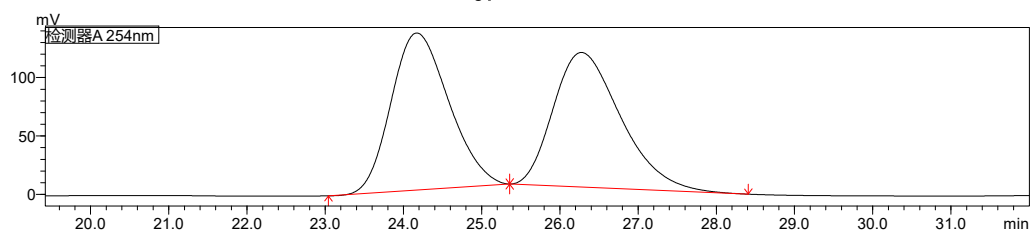

| Peak# | Ret. Time | Height | Area%  |
|-------|-----------|--------|--------|
| 1     | 24.170    | 134481 | 49.908 |
| 2     | 26.274    | 115257 | 50.092 |

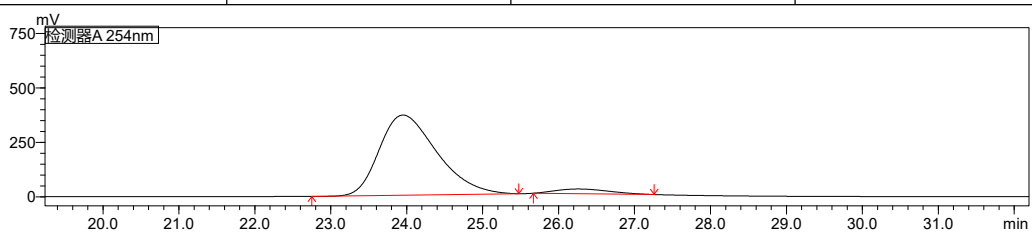

| Peak# | Ret. Time | Height | Area%  |
|-------|-----------|--------|--------|
| 1     | 23.950    | 367746 | 94.805 |
| 2     | 26.257    | 21627  | 5.195  |

HPLC conditions: Chiralpak IC, 20% *i*PrOH/Hx eluent, 1.0 mL/min, 254 nm

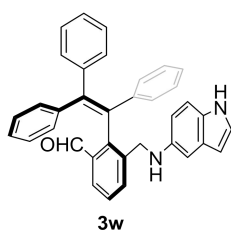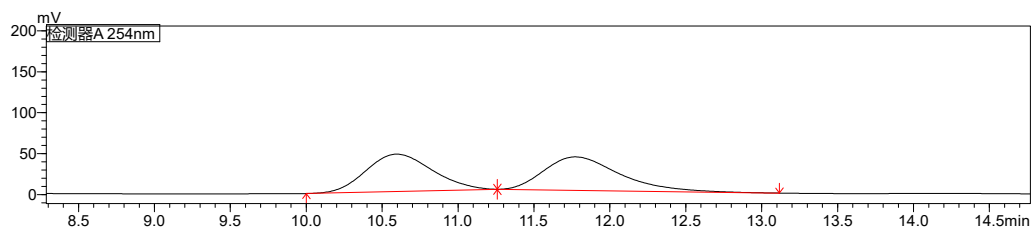

| Peak# | Ret. Time | Height | Area%  |
|-------|-----------|--------|--------|
| 1     | 10.596    | 45665  | 49.455 |
| 2     | 11.772    | 40883  | 50.545 |

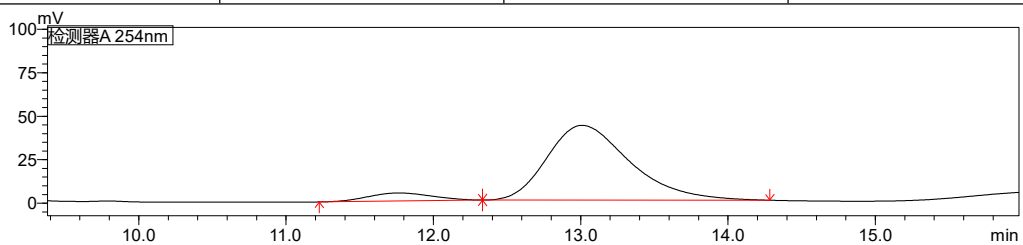

| Peak# | Ret. Time | Height | Area%  |
|-------|-----------|--------|--------|
| 1     | 11.766    | 4620   | 7.628  |
| 2     | 13.010    | 43013  | 92.372 |

HPLC conditions: Chiralpak IA, 20% *i*PrOH/Hx eluent, 0.5 mL/min, 254 nm

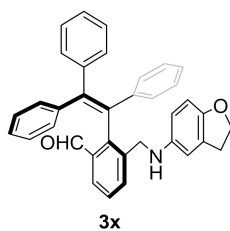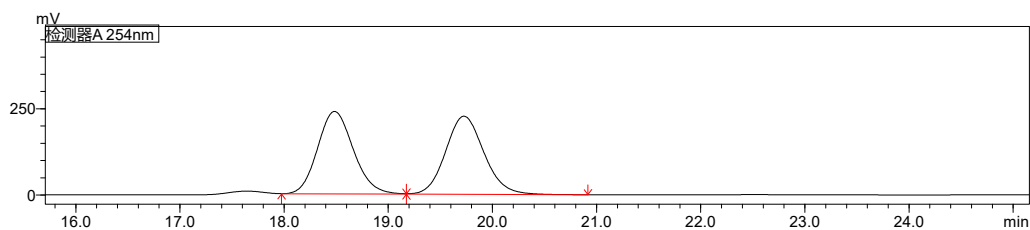

| Peak# | Ret. Time | Height | Area%  |
|-------|-----------|--------|--------|
| 1     | 18.484    | 239140 | 49.548 |
| 2     | 19.726    | 226621 | 50.452 |

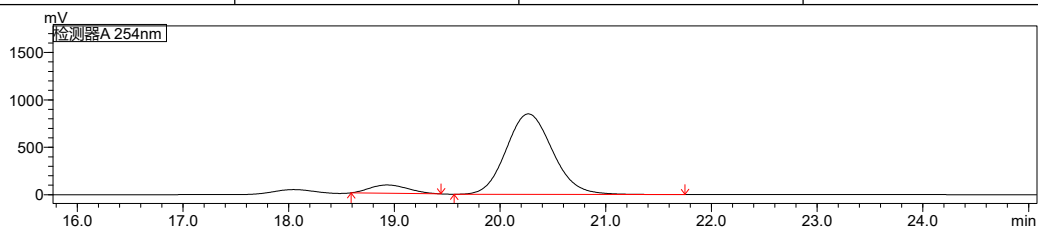

| Peak# | Ret. Time | Height | Area%  |
|-------|-----------|--------|--------|
| 1     | 18.931    | 87118  | 7.784  |
| 2     | 20.267    | 849054 | 92.216 |

HPLC conditions: Chiralpak OD-H, 20% *i*PrOH/Hx eluent, 0.5 mL/min, 254 nm

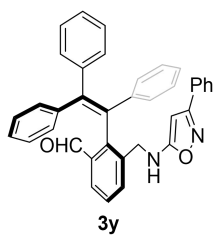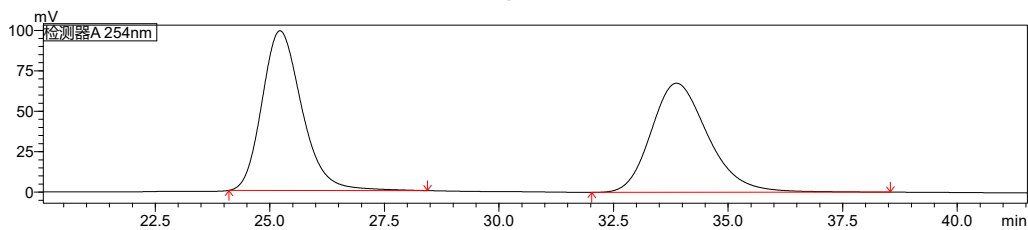

| Peak# | Ret. Time | Height | Area%  |
|-------|-----------|--------|--------|
| 1     | 25.220    | 98673  | 50.640 |
| 2     | 33.874    | 67458  | 49.360 |

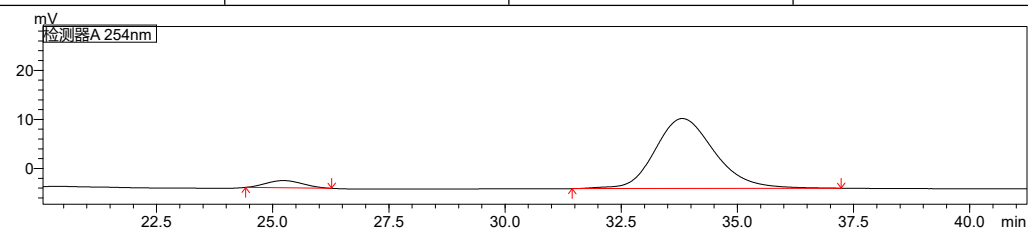

| Peak# | Ret. Time | Height | Area%  |
|-------|-----------|--------|--------|
| 1     | 25.236    | 1478   | 5.984  |
| 2     | 33.814    | 14251  | 94.016 |

HPLC conditions: Chiralpak OD-H, 20% *i*PrOH/Hx eluent, 0.5 mL/min, 254 nm

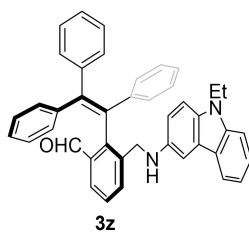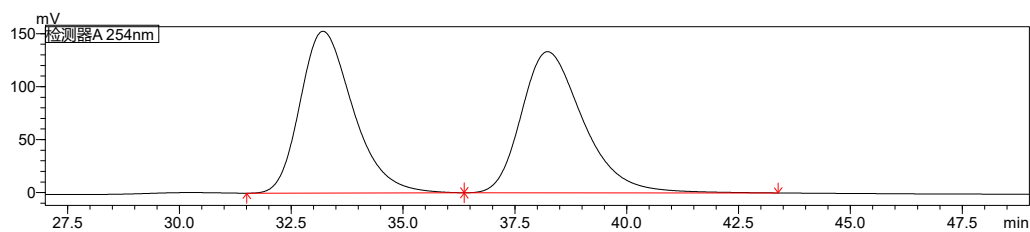

| Peak# | Ret. Time | Height | Area%  |
|-------|-----------|--------|--------|
| 1     | 33.211    | 152690 | 49.532 |
| 2     | 38.229    | 133170 | 50.468 |

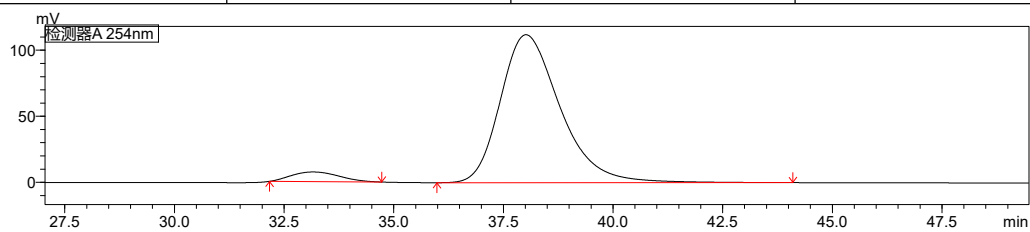

| Peak# | Ret. Time | Height | Area%  |
|-------|-----------|--------|--------|
| 1     | 33.164    | 7300   | 4.952  |
| 2     | 38.013    | 112001 | 95.048 |

HPLC conditions: Chiralpak IA, 20% *i*PrOH/Hx eluent, 0.5 mL/min, 254 nm

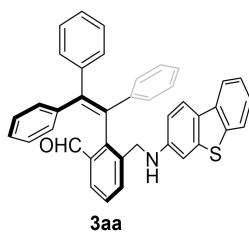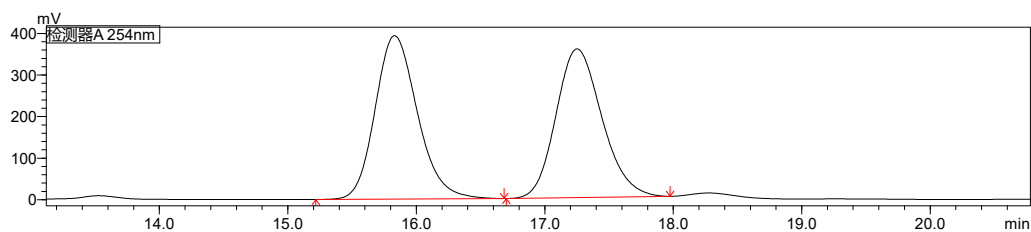

| Peak# | Ret. Time | Height | Area%  |
|-------|-----------|--------|--------|
| 1     | 15.830    | 393270 | 50.282 |
| 2     | 17.251    | 357918 | 49.718 |

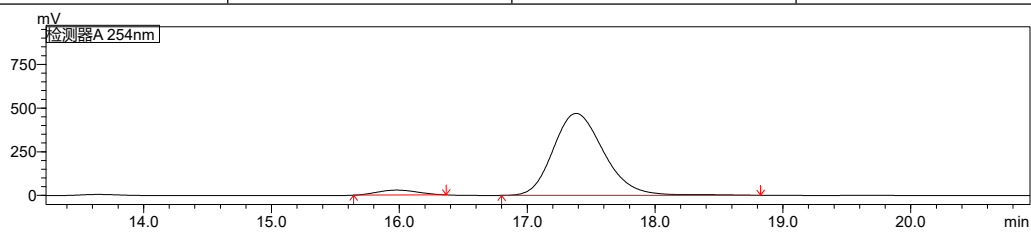

| Peak# | Ret. Time | Height | Area%  |
|-------|-----------|--------|--------|
| 1     | 15.978    | 28423  | 4.614  |
| 2     | 17.382    | 469530 | 95.386 |

HPLC conditions: Chiralpak IA, 10% *i*PrOH/Hx eluent, 1.0 mL/min, 254 nm

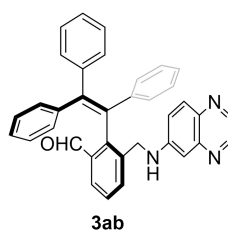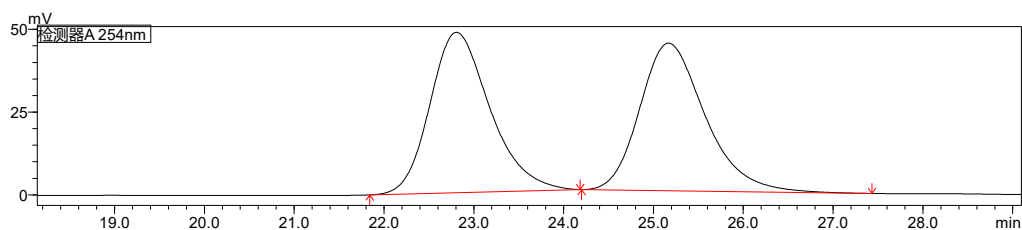

| Peak# | Ret. Time | Height | Area%  |
|-------|-----------|--------|--------|
| 1     | 22.807    | 48465  | 49.968 |
| 2     | 25.167    | 44588  | 50.032 |

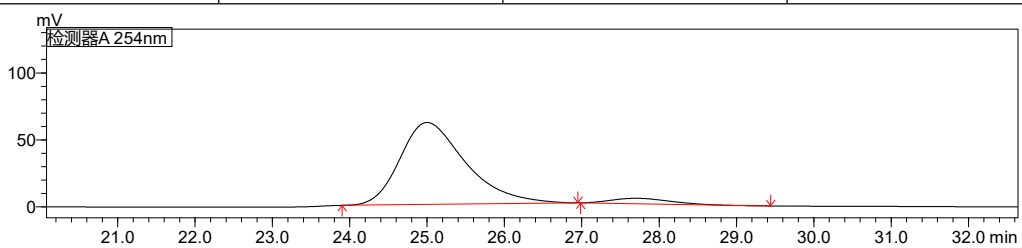

| Peak# | Ret. Time | Height | Area%  |
|-------|-----------|--------|--------|
| 1     | 24.999    | 61229  | 94.505 |
| 2     | 27.696    | 4064   | 5.495  |

HPLC conditions: Chiralpak IA, 10% *i*PrOH/Hx eluent, 0.5 mL/min, 254 nm

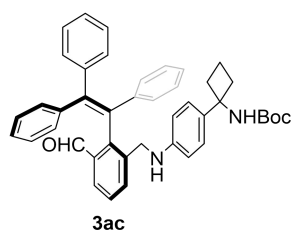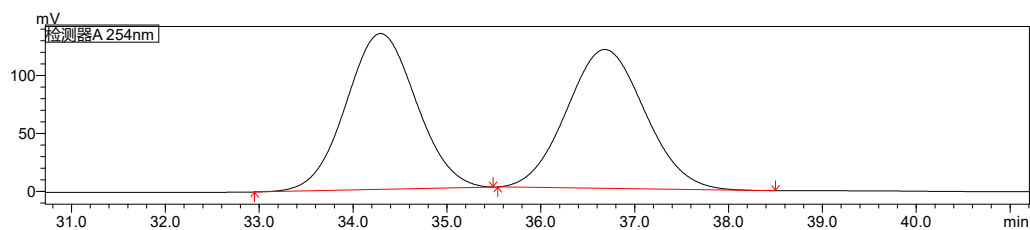

| Peak# | Ret. Time | Height | Area%  |
|-------|-----------|--------|--------|
| 1     | 34.293    | 134442 | 50.201 |
| 2     | 36.682    | 119773 | 49.799 |

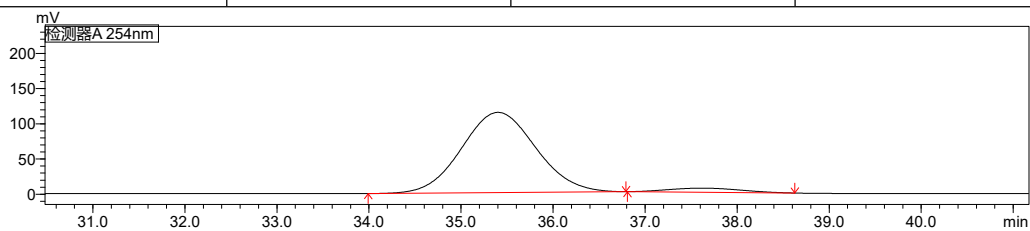

| Peak# | Ret. Time | Height | Area%  |
|-------|-----------|--------|--------|
| 1     | 35.401    | 113993 | 95.266 |
| 2     | 37.616    | 5897   | 4.734  |

HPLC conditions: Chiralpak AD-H, 20% iPrOH/Hx eluent, 0.5 mL/min, 254 nm

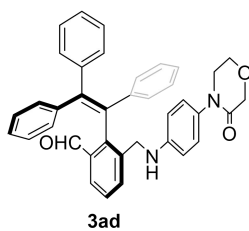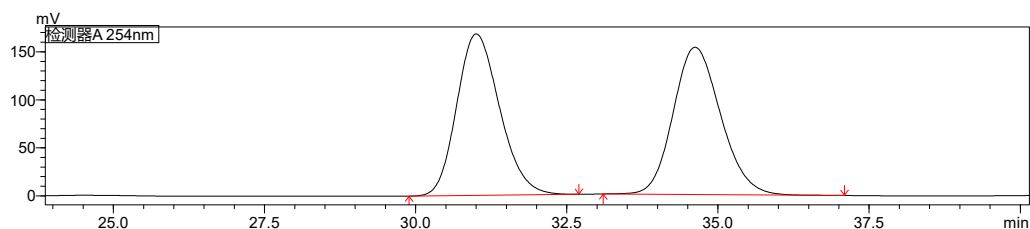

| Peak# | Ret. Time | Height | Area%  |
|-------|-----------|--------|--------|
| 1     | 30.999    | 168166 | 49.748 |
| 2     | 34.622    | 153402 | 50.252 |

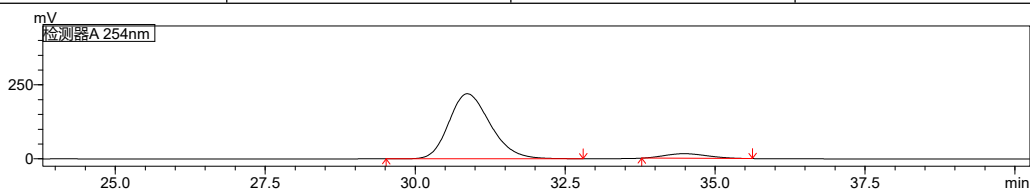

| Peak# | Ret. Time | Height | Area%  |
|-------|-----------|--------|--------|
| 1     | 30.870    | 219603 | 93.093 |
| 2     | 34.485    | 15654  | 6.907  |

HPLC conditions: Chiralpak IA, 20% *i*PrOH/Hx eluent, 0.5 mL/min, 254 nm

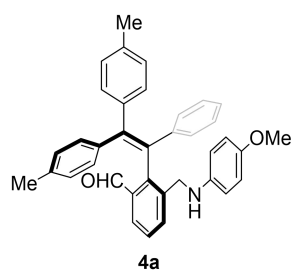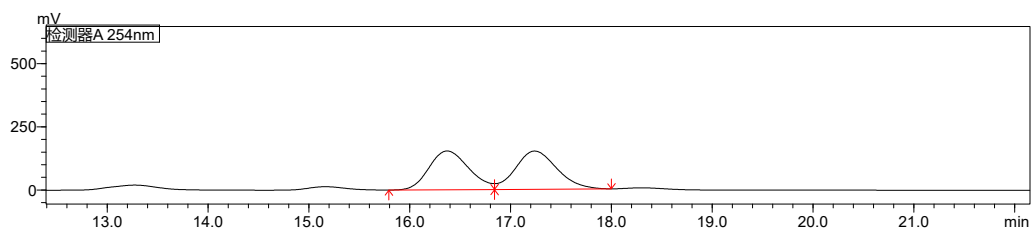

| Peak# | Ret. Time | Height | Area%  |
|-------|-----------|--------|--------|
| 1     | 16.370    | 153612 | 49.431 |
| 2     | 17.238    | 151140 | 50.569 |

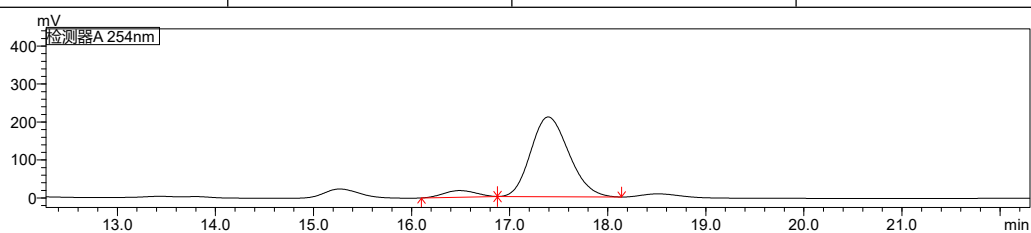

| Peak# | Ret. Time | Height | Area%  |
|-------|-----------|--------|--------|
| 1     | 16.491    | 17505  | 6.586  |
| 2     | 17.392    | 210031 | 93.414 |

HPLC conditions: Chiralpak IA, 20% *i*PrOH/Hx eluent, 0.5 mL/min, 254 nm

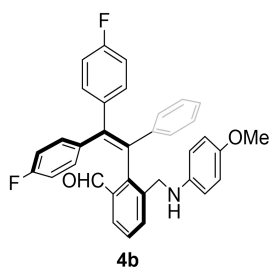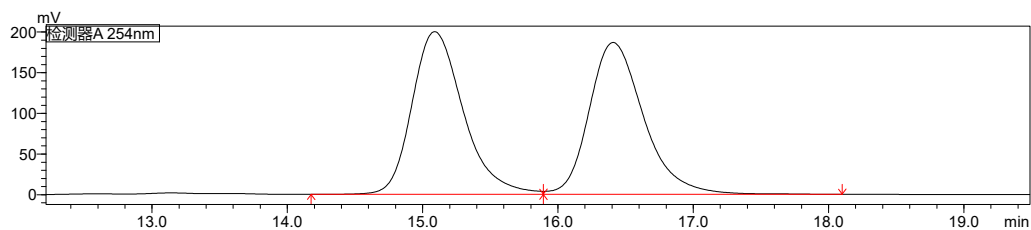

| Peak# | Ret. Time | Height | Area%  |
|-------|-----------|--------|--------|
| 1     | 15.089    | 200056 | 50.230 |
| 2     | 16.407    | 186752 | 49.770 |

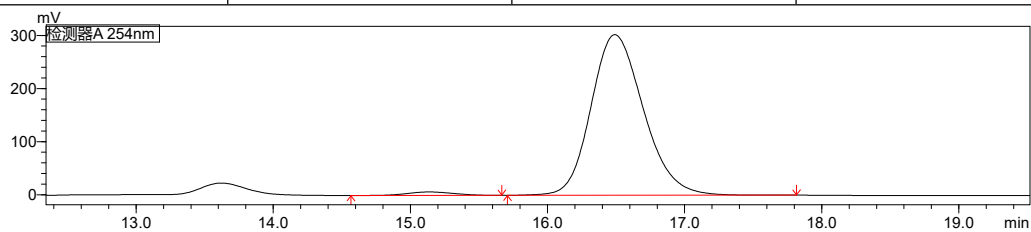

| Peak# | Ret. Time | Height | Area%  |
|-------|-----------|--------|--------|
| 1     | 15.137    | 6561   | 1.900  |
| 2     | 16.491    | 302575 | 98.100 |

HPLC conditions: Chiralpak IA, 20% *i*PrOH/Hx eluent, 0.5 mL/min, 254 nm

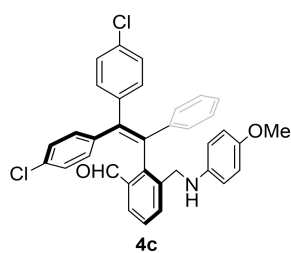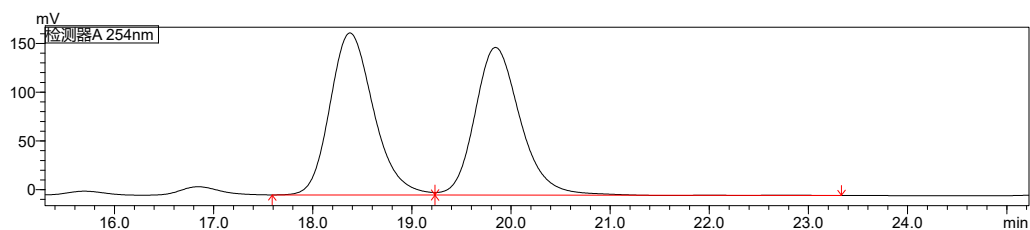

| Peak# | Ret. Time | Height | Area%  |
|-------|-----------|--------|--------|
| 1     | 18.375    | 166199 | 51.279 |
| 2     | 19.843    | 151468 | 48.721 |

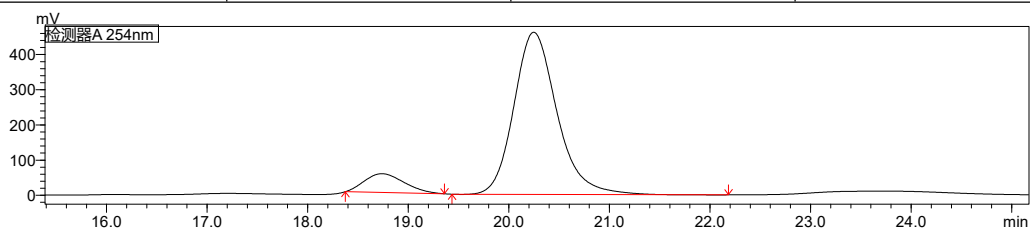

| Peak# | Ret. Time | Height | Area%  |
|-------|-----------|--------|--------|
| 1     | 18.736    | 53401  | 9.632  |
| 2     | 20.247    | 460939 | 90.368 |

HPLC conditions: Chiralpak AD-H, 20% iPrOH/Hx eluent, 0.5 mL/min, 254 nm

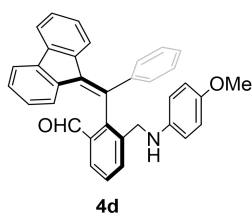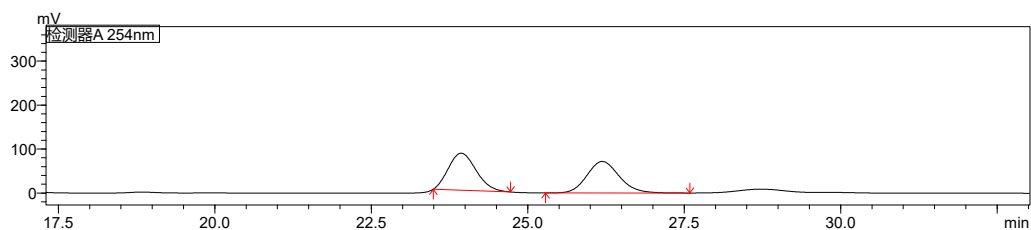

| Peak# | Ret. Time | Height | Area%  |
|-------|-----------|--------|--------|
| 1     | 23.935    | 84150  | 50.095 |
| 2     | 26.189    | 71717  | 49.905 |

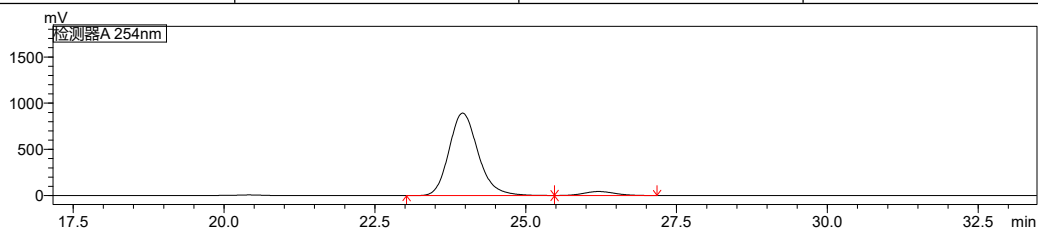

| Peak# | Ret. Time | Height | Area%  |
|-------|-----------|--------|--------|
| 1     | 23.954    | 892877 | 95.113 |
| 2     | 26.208    | 43101  | 4.887  |

HPLC conditions: Chiralpak IA, 20% *i*PrOH/Hx eluent, 0.5 mL/min, 254 nm

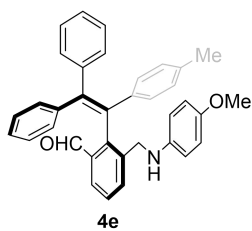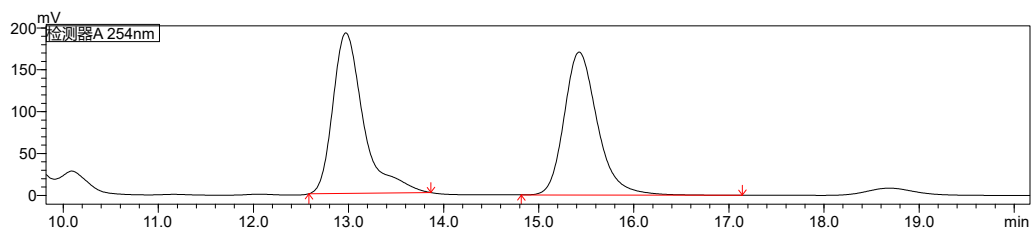

| Peak# | Ret. Time | Height | Area%  |
|-------|-----------|--------|--------|
| 1     | 12.971    | 191727 | 50.821 |
| 2     | 15.425    | 170761 | 49.179 |

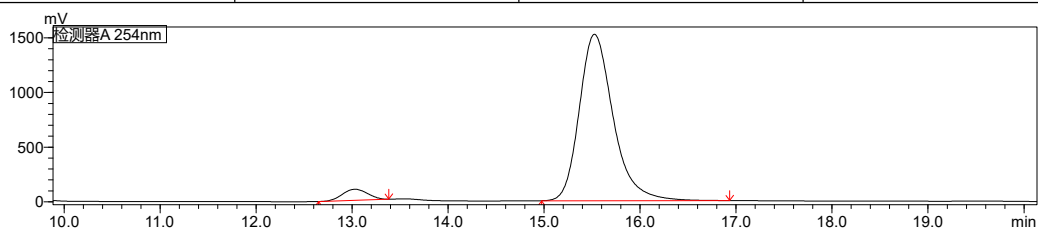

| Peak# | Ret. Time | Height  | Area%  |
|-------|-----------|---------|--------|
| 1     | 13.030    | 101665  | 4.754  |
| 2     | 15.525    | 1523180 | 95.246 |

HPLC conditions: Chiralpak IA, 20% *i*PrOH/Hx eluent, 0.5 mL/min, 254 nm

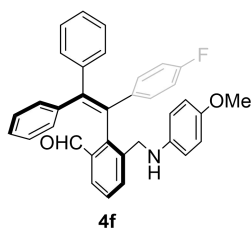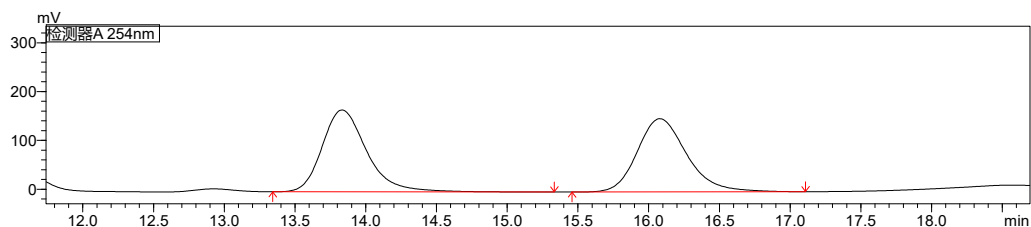

| Peak# | Ret. Time | Height | Area%  |
|-------|-----------|--------|--------|
| 1     | 13.832    | 167576 | 50.155 |
| 2     | 16.079    | 149871 | 49.845 |

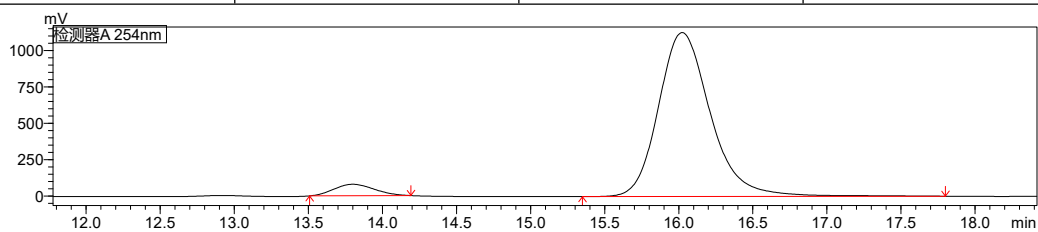

| Peak# | Ret. Time | Height  | Area%  |
|-------|-----------|---------|--------|
| 1     | 13.800    | 78986   | 5.166  |
| 2     | 16.023    | 1125570 | 94.834 |

HPLC conditions: Chiralpak IA, 20% *i*PrOH/Hx eluent, 0.5 mL/min, 254 nm

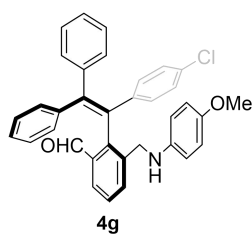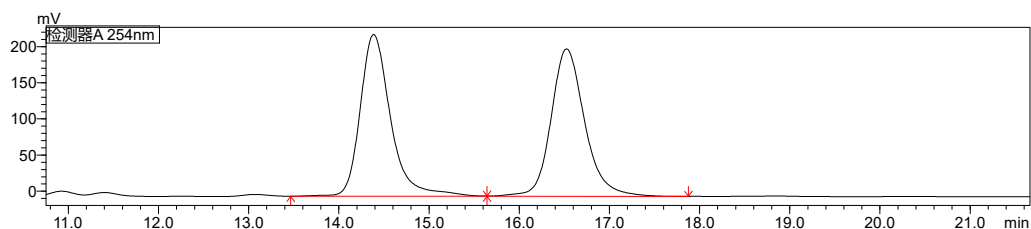

| Peak# | Ret. Time | Height | Area%  |
|-------|-----------|--------|--------|
| 1     | 14.385    | 223916 | 49.898 |
| 2     | 16.525    | 203963 | 50.102 |

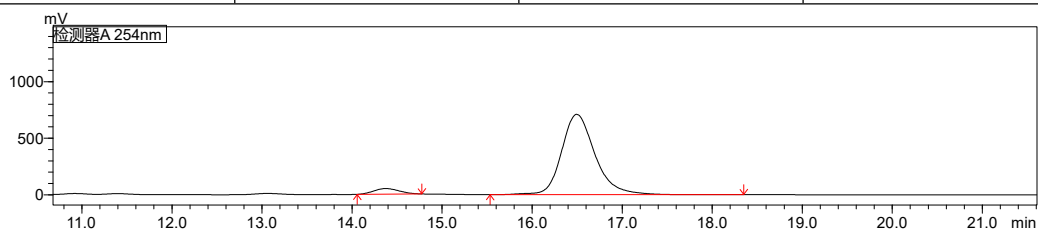

| Peak# | Ret. Time | Height | Area%  |
|-------|-----------|--------|--------|
| 1     | 14.375    | 49301  | 5.032  |
| 2     | 16.495    | 710815 | 94.968 |

HPLC conditions: Chiralpak IA, 20% *i*PrOH/Hx eluent, 0.5 mL/min, 254 nm

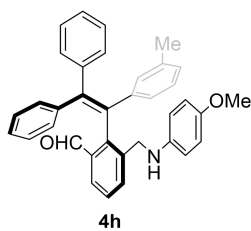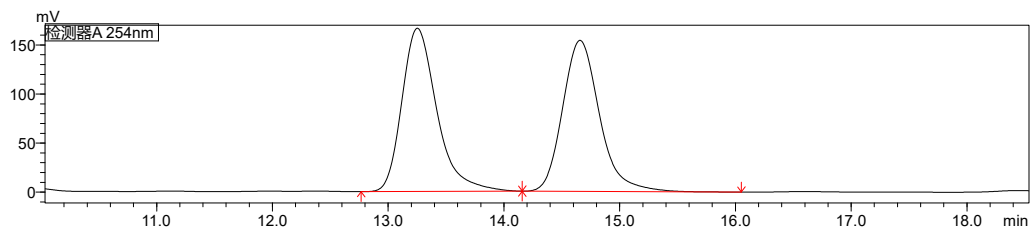

| Peak# | Ret. Time | Height | Area%  |
|-------|-----------|--------|--------|
| 1     | 13.252    | 166494 | 50.659 |
| 2     | 14.657    | 154040 | 49.341 |

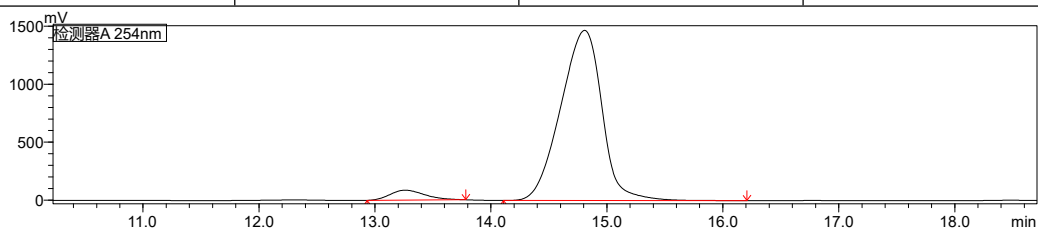

| Peak# | Ret. Time | Height  | Area%  |
|-------|-----------|---------|--------|
| 1     | 13.263    | 85725   | 4.702  |
| 2     | 14.808    | 1468375 | 95.298 |

HPLC conditions: Chiralpak AD-H, 20% iPrOH/Hx eluent, 0.5 mL/min, 254 nm

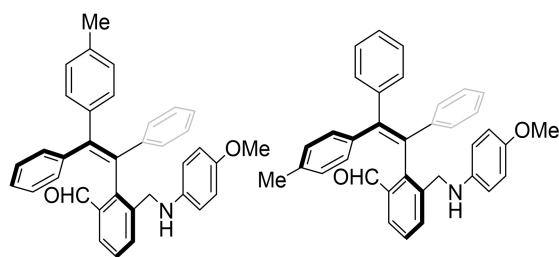

4i

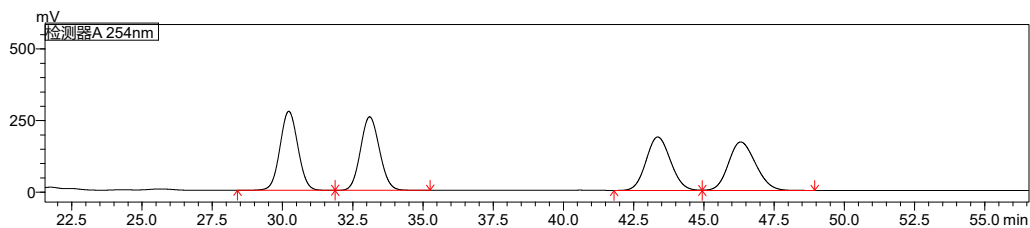

| Peak# | Ret. Time | Height | Area%  |
|-------|-----------|--------|--------|
| 1     | 30.222    | 276144 | 26.105 |
| 2     | 33.101    | 256810 | 25.731 |
| 3     | 43.357    | 186684 | 24.020 |
| 4     | 46.310    | 169193 | 24.144 |

数据文件名:AM-2-146-9-AD9010-254-0.5.lcd  
样品名:AM-2-146-9-AD9010-254-0.5

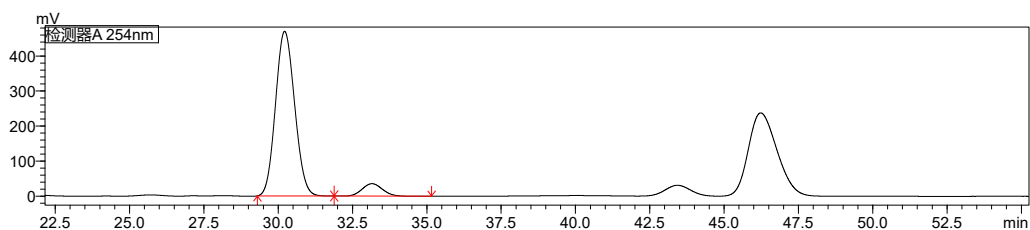

| Peak# | Ret. Time | Height | Area%  |
|-------|-----------|--------|--------|
| 1     | 30.215    | 469948 | 92.567 |
| 2     | 33.152    | 35563  | 7.433  |

数据文件名:AM-2-146-9-AD9010-254-0.5.lcd  
样品名:AM-2-146-9-AD9010-254-0.5

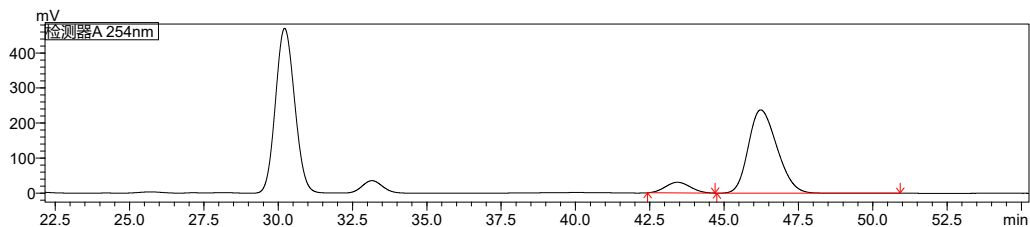

| Peak# | Ret. Time | Height | Area%  |
|-------|-----------|--------|--------|
| 1     | 43.431    | 30422  | 10.012 |
| 2     | 46.232    | 237862 | 89.988 |

HPLC conditions: Chiralpak IA, 20% *i*PrOH/Hx eluent, 0.5 mL/min, 254 nm

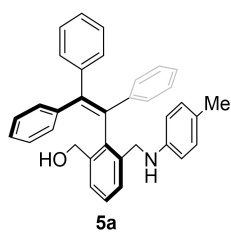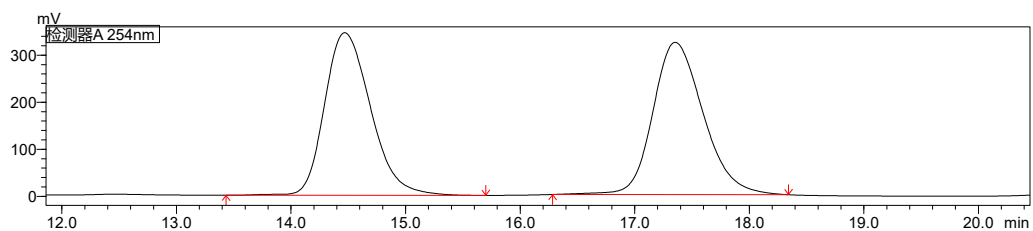

| Peak# | Ret. Time | Height | Area%  |
|-------|-----------|--------|--------|
| 1     | 14.468    | 345600 | 49.374 |
| 2     | 17.353    | 323398 | 50.626 |

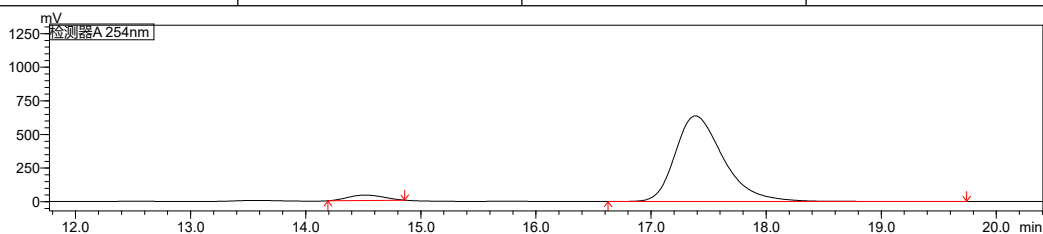

| Peak# | Ret. Time | Height | Area%  |
|-------|-----------|--------|--------|
| 1     | 14.517    | 40220  | 4.421  |
| 2     | 17.385    | 636788 | 95.579 |

HPLC conditions: Chiralpak AD-H, 10% iPrOH/Hx eluent, 0.5 mL/min, 254 nm

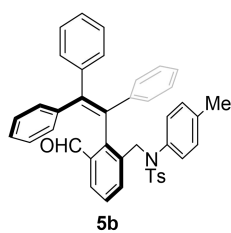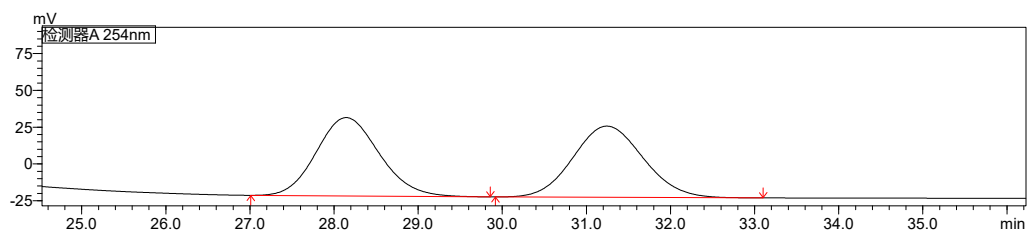

| Peak# | Ret. Time | Height | Area%  |
|-------|-----------|--------|--------|
| 1     | 28.143    | 53293  | 49.693 |
| 2     | 31.243    | 48416  | 50.307 |

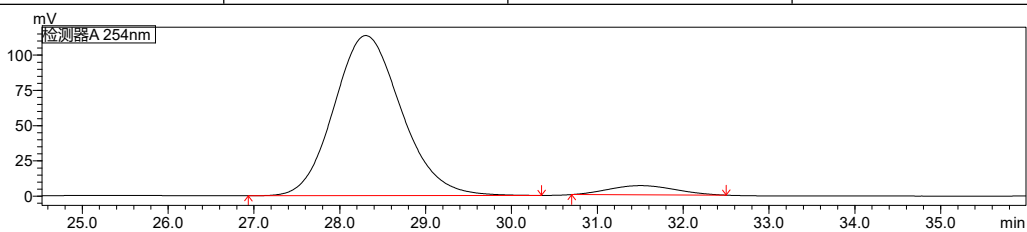

| Peak# | Ret. Time | Height | Area%  |
|-------|-----------|--------|--------|
| 1     | 28.302    | 113513 | 94.618 |
| 2     | 31.504    | 6543   | 5.382  |

HPLC conditions: Chiralpak IA, 20% *i*PrOH/Hx eluent, 0.5 mL/min, 254 nm

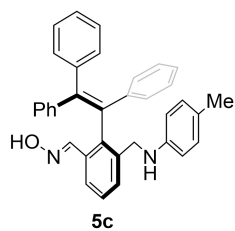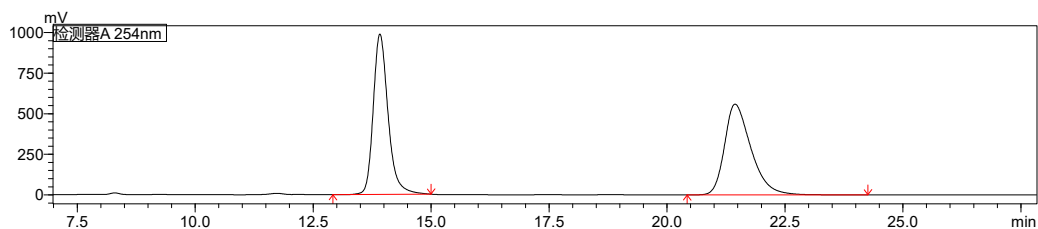

| Peak# | Ret. Time | Height | Area%  |
|-------|-----------|--------|--------|
| 1     | 13.915    | 987442 | 49.764 |
| 2     | 21.442    | 559099 | 50.236 |

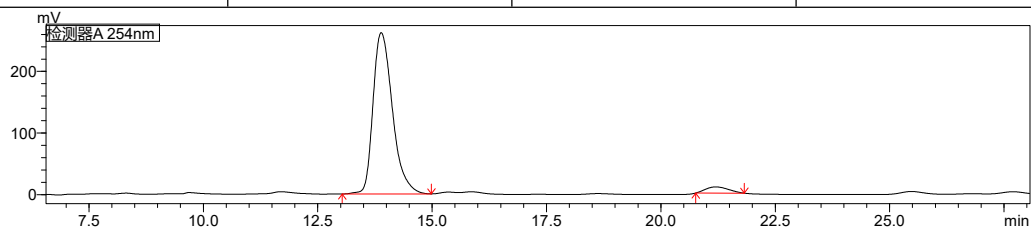

| Peak# | Ret. Time | Height  | Area%  |
|-------|-----------|---------|--------|
| 1     | 13.263    | 85725   | 4.702  |
| 2     | 14.808    | 1468375 | 95.298 |

HPLC conditions: Chiralpak IA, 20% *i*PrOH/Hx eluent, 0.5 mL/min, 254 nm

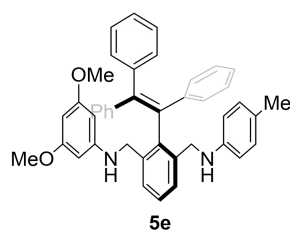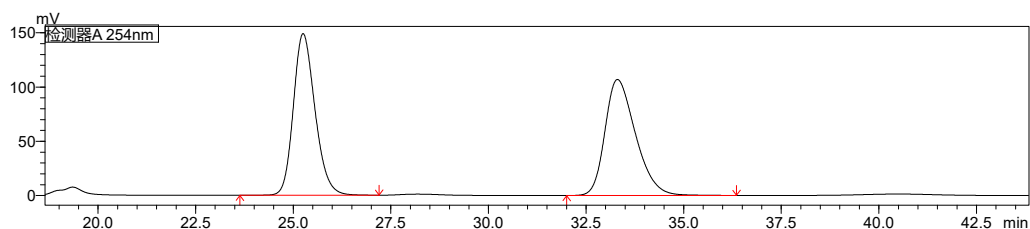

| Peak# | Ret. Time | Height | Area%  |
|-------|-----------|--------|--------|
| 1     | 25.250    | 149114 | 49.738 |
| 2     | 33.303    | 106910 | 50.262 |

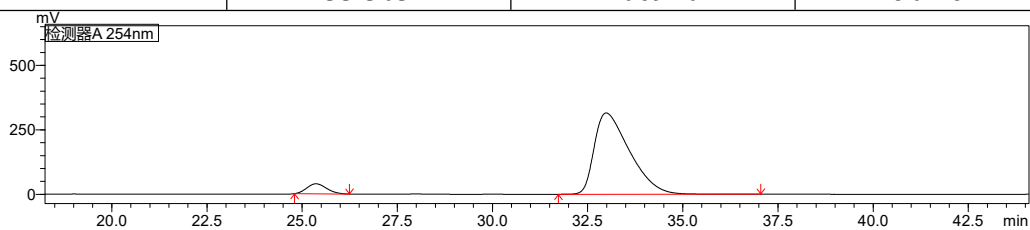

| Peak# | Ret. Time | Height | Area%  |
|-------|-----------|--------|--------|
| 1     | 25.363    | 38773  | 6.450  |
| 2     | 32.988    | 315539 | 93.550 |

## 9. Crystallographic Data

Datablock 71\_1 - ellipsoid plot

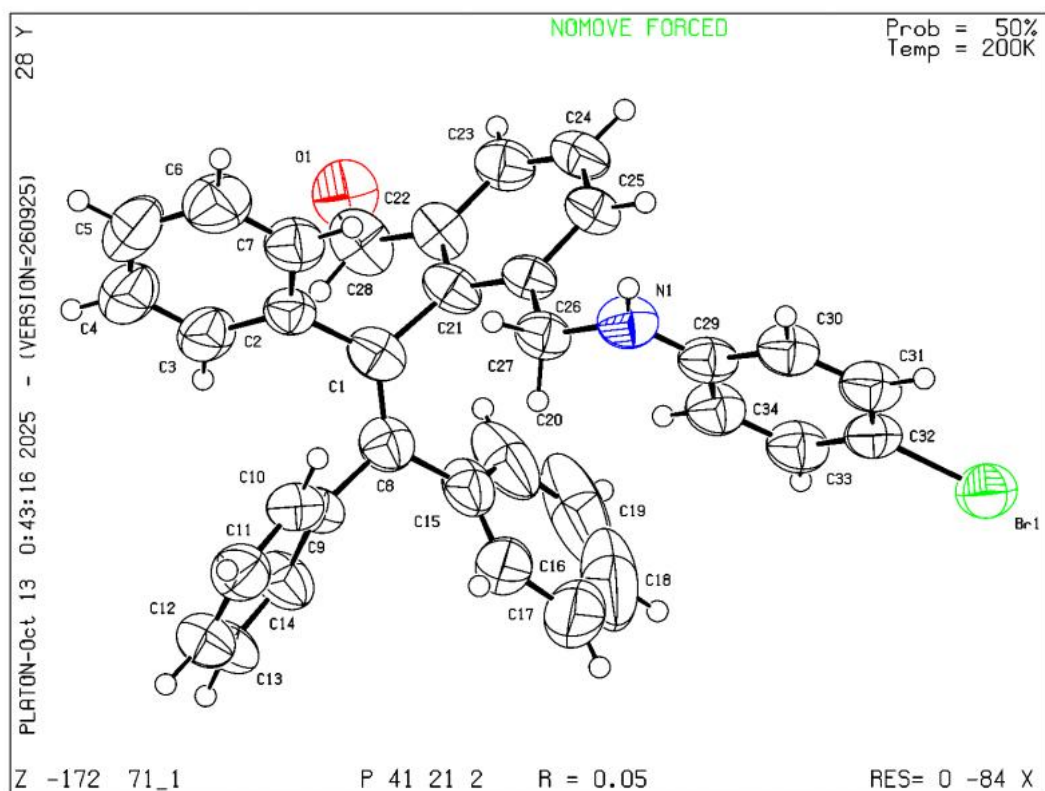

**Table S1 Crystal data and structure refinement for 3i.**

|                     |                                      |
|---------------------|--------------------------------------|
| Identification code | 3i                                   |
| Empirical formula   | C <sub>34</sub> H <sub>26</sub> BrNO |
| Formula weight      | 544.47                               |
| Temperature/K       | 199.99(10)                           |
| Crystal system      | tetragonal                           |
| Space group         | P4 <sub>1</sub> 2 <sub>1</sub> 2     |
| a/Å                 | 10.01780(10)                         |
| b/Å                 | 10.01780(10)                         |
| c/Å                 | 53.4159(16)                          |
| α/°                 | 90                                   |

|                                               |                                                               |
|-----------------------------------------------|---------------------------------------------------------------|
| $\beta/^\circ$                                | 90                                                            |
| $\gamma/^\circ$                               | 90                                                            |
| Volume/ $\text{\AA}^3$                        | 5360.62(19)                                                   |
| Z                                             | 8                                                             |
| $\rho_{\text{calc}}/\text{cm}^3$              | 1.349                                                         |
| $\mu/\text{mm}^{-1}$                          | 2.291                                                         |
| F(000)                                        | 2240.0                                                        |
| Crystal size/ $\text{mm}^3$                   | $0.14 \times 0.12 \times 0.1$                                 |
| Radiation                                     | Cu K $\alpha$ ( $\lambda = 1.54184$ )                         |
| $2\Theta$ range for data collection/ $^\circ$ | 6.62 to 146.22                                                |
| Index ranges                                  | $-10 \leq h \leq 11, -12 \leq k \leq 12, -65 \leq l \leq 60$  |
| Reflections collected                         | 27123                                                         |
| Independent reflections                       | 5255 [ $R_{\text{int}} = 0.0495, R_{\text{sigma}} = 0.0255$ ] |
| Data/restraints/parameters                    | 5255/0/334                                                    |
| Goodness-of-fit on $F^2$                      | 1.082                                                         |
| Final R indexes [ $I \geq 2\sigma(I)$ ]       | $R_1 = 0.0504, wR_2 = 0.1350$                                 |
| Final R indexes [all data]                    | $R_1 = 0.0543, wR_2 = 0.1378$                                 |
| Largest diff. peak/hole / $e \text{\AA}^{-3}$ | 0.45/-0.33                                                    |
| Flack/Hooft parameter                         | 0.039(12)/0.054(7)                                            |

### Crystal structure determination of **[3i]**

**Crystal Data** for  $\text{C}_{34}\text{H}_{26}\text{BrNO}$  ( $M = 544.47 \text{ g/mol}$ ): tetragonal, space group  $P4_12_12$  (no. 92),  $a = 10.01780(10) \text{ \AA}$ ,  $c = 53.4159(16) \text{ \AA}$ ,  $V = 5360.62(19) \text{ \AA}^3$ ,  $Z = 8$ ,  $T = 199.99(10) \text{ K}$ ,  $\mu(\text{Cu K}\alpha) = 2.291 \text{ mm}^{-1}$ ,  $D_{\text{calc}} = 1.349 \text{ g/cm}^3$ , 27123 reflections measured ( $6.62^\circ \leq 2\Theta \leq 146.22^\circ$ ), 5255 unique ( $R_{\text{int}} = 0.0495, R_{\text{sigma}} = 0.0255$ ) which were used in all calculations. The final  $R_1$  was 0.0504 ( $I > 2\sigma(I)$ ) and  $wR_2$  was 0.1378 (all data).

### Refinement model description

**Table S2 Fractional Atomic Coordinates ( $\times 10^4$ ) and Equivalent Isotropic Displacement Parameters ( $\text{\AA}^2 \times 10^3$ ) for 3i.  $U_{\text{eq}}$  is defined as 1/3 of the trace of the orthogonalised  $U_{\text{IJ}}$  tensor.**

| Atom | <i>x</i>  | <i>y</i>  | <i>z</i>   | $U_{\text{eq}}$ |
|------|-----------|-----------|------------|-----------------|
| Br1  | -515.4(7) | 6052.9(6) | 6816.9(2)  | 78.9(2)         |
| O1   | 6372(4)   | -2262(4)  | 7236.0(9)  | 85.7(11)        |
| N1   | 5206(5)   | 4889(4)   | 7122.9(8)  | 65.6(10)        |
| C1   | 7262(5)   | 1252(4)   | 6876.4(9)  | 63.0(12)        |
| C2   | 8695(5)   | 1058(5)   | 6956.5(8)  | 55.7(10)        |
| C3   | 9477(6)   | 103(5)    | 6846.4(11) | 75.3(14)        |
| C4   | 10745(7)  | -119(7)   | 6924.6(13) | 93(2)           |
| C5   | 11267(8)  | 628(9)    | 7116.7(15) | 106(2)          |
| C6   | 10497(7)  | 1606(9)   | 7234.1(13) | 97(2)           |
| C7   | 9213(6)   | 1793(6)   | 7153.8(10) | 74.0(13)        |
| C8   | 6927(5)   | 1439(5)   | 6638.0(9)  | 64.7(11)        |
| C9   | 7975(5)   | 1664(5)   | 6437.8(8)  | 59.0(10)        |
| C10  | 8893(5)   | 2676(5)   | 6456.4(9)  | 61.8(11)        |
| C11  | 9738(6)   | 2962(6)   | 6263.2(11) | 77.4(14)        |
| C12  | 9707(7)   | 2218(7)   | 6051.1(11) | 82.0(16)        |
| C13  | 8792(7)   | 1217(8)   | 6024.4(10) | 88.8(18)        |
| C14  | 7918(6)   | 912(6)    | 6219.4(10) | 76.3(15)        |
| C15  | 5523(5)   | 1536(6)   | 6551.9(10) | 76.2(15)        |
| C16  | 5226(8)   | 2501(10)  | 6369.2(12) | 110(3)          |
| C17  | 3962(15)  | 2563(19)  | 6265.6(19) | 191(8)          |
| C18  | 2992(16)  | 1610(30)  | 6354(4)    | 240(14)         |
| C19  | 3288(10)  | 790(20)   | 6515(3)    | 208(10)         |
| C20  | 4530(6)   | 667(9)    | 6622.9(15) | 117(3)          |

**Table S2 Fractional Atomic Coordinates ( $\times 10^4$ ) and Equivalent Isotropic Displacement Parameters ( $\text{\AA}^2 \times 10^3$ ) for 3i.  $U_{\text{eq}}$  is defined as 1/3 of the trace of the orthogonalised  $U_{\text{IJ}}$  tensor.**

| Atom | <i>x</i> | <i>y</i> | <i>z</i>   | $U_{\text{eq}}$ |
|------|----------|----------|------------|-----------------|
| C21  | 6230(5)  | 1258(5)  | 7082.7(8)  | 59.9(11)        |
| C22  | 5961(5)  | 60(5)    | 7211.7(10) | 64.2(12)        |
| C23  | 5102(5)  | 72(5)    | 7416.5(9)  | 66.7(12)        |
| C24  | 4526(5)  | 1236(5)  | 7493.0(9)  | 67.7(12)        |
| C25  | 4792(5)  | 2422(5)  | 7368.8(8)  | 61.5(11)        |
| C26  | 5637(5)  | 2448(4)  | 7163.4(7)  | 53.5(10)        |
| C27  | 5951(5)  | 3772(5)  | 7035.0(8)  | 58.7(10)        |
| C28  | 6523(6)  | -1220(5) | 7130.0(12) | 79.5(15)        |
| C29  | 3912(6)  | 5126(5)  | 7053.3(8)  | 60.2(11)        |
| C30  | 3256(6)  | 6288(5)  | 7132.3(9)  | 66.1(12)        |
| C31  | 1954(6)  | 6565(5)  | 7067.7(9)  | 69.5(13)        |
| C32  | 1280(5)  | 5658(5)  | 6917.7(8)  | 62.0(11)        |
| C33  | 1871(6)  | 4513(5)  | 6838.6(9)  | 68.6(12)        |
| C34  | 3172(6)  | 4237(5)  | 6906.9(9)  | 67.1(12)        |

**Table S3 Anisotropic Displacement Parameters ( $\text{\AA}^2 \times 10^3$ ) for 3i. The Anisotropic displacement factor exponent takes the form:  $-2\pi^2[h^2a^{*2}U_{11}+2hka^*b^*U_{12}+\dots]$ .**

| Atom | $U_{11}$ | $U_{22}$ | $U_{33}$ | $U_{23}$  | $U_{13}$ | $U_{12}$  |
|------|----------|----------|----------|-----------|----------|-----------|
| Br1  | 92.0(4)  | 77.6(4)  | 67.2(3)  | -0.4(3)   | -6.2(3)  | 6.1(3)    |
| O1   | 95(3)    | 56(2)    | 106(3)   | 2(2)      | 4(2)     | -13.6(18) |
| N1   | 83(3)    | 52(2)    | 61(2)    | -10.1(17) | -9(2)    | -9.4(18)  |
| C1   | 81(3)    | 48(2)    | 60(3)    | -8.4(19)  | 9(2)     | -10(2)    |
| C2   | 66(3)    | 52(2)    | 49(2)    | 2.8(18)   | 2.1(19)  | 0.4(19)   |

**Table S3 Anisotropic Displacement Parameters ( $\text{\AA}^2 \times 10^3$ ) for 3i. The Anisotropic displacement factor exponent takes the form:  $-2\pi^2[h^2a^{*2}U_{11}+2hka^*b^*U_{12}+\dots]$ .**

| Atom | $U_{11}$ | $U_{22}$ | $U_{33}$ | $U_{23}$  | $U_{13}$ | $U_{12}$  |
|------|----------|----------|----------|-----------|----------|-----------|
| C3   | 96(4)    | 60(3)    | 70(3)    | 6(2)      | -6(3)    | 18(3)     |
| C4   | 105(5)   | 85(4)    | 90(4)    | 9(3)      | -10(4)   | 29(4)     |
| C5   | 91(5)    | 120(6)   | 108(5)   | 9(5)      | -28(4)   | 31(4)     |
| C6   | 88(4)    | 125(6)   | 78(4)    | -12(4)    | -20(3)   | -10(4)    |
| C7   | 79(4)    | 80(3)    | 63(3)    | -11(3)    | -7(2)    | -3(3)     |
| C8   | 68(3)    | 62(3)    | 64(3)    | -13(2)    | -2(2)    | -5(2)     |
| C9   | 68(3)    | 63(3)    | 45(2)    | -4.7(19)  | 4(2)     | 0(2)      |
| C10  | 74(3)    | 59(2)    | 52(2)    | 2.3(19)   | -5(2)    | -3(2)     |
| C11  | 72(3)    | 84(4)    | 76(3)    | 12(3)     | 3(3)     | -5(3)     |
| C12  | 83(4)    | 98(4)    | 65(3)    | 10(3)     | 16(3)    | 6(3)      |
| C13  | 103(4)   | 111(5)   | 53(3)    | -28(3)    | 9(3)     | 14(4)     |
| C14  | 79(3)    | 84(4)    | 66(3)    | -26(3)    | 7(3)     | -10(3)    |
| C15  | 58(3)    | 107(4)   | 64(3)    | -35(3)    | -2(2)    | 1(3)      |
| C16  | 104(5)   | 157(7)   | 70(4)    | -24(4)    | -14(4)   | 53(5)     |
| C17  | 168(11)  | 320(20)  | 89(6)    | -74(9)    | -46(7)   | 145(13)   |
| C18  | 100(9)   | 430(30)  | 187(15)  | -197(19)  | -56(9)   | 104(14)   |
| C19  | 62(5)    | 340(20)  | 223(15)  | -206(17)  | 21(7)    | -37(9)    |
| C20  | 70(4)    | 179(8)   | 103(5)   | -82(5)    | 21(3)    | -40(4)    |
| C21  | 71(3)    | 59(3)    | 50(2)    | -11.8(19) | 11(2)    | -18(2)    |
| C22  | 68(3)    | 54(2)    | 70(3)    | -7(2)     | 10(2)    | -12.3(19) |
| C23  | 73(3)    | 68(3)    | 59(2)    | 7(2)      | 6(2)     | -14(2)    |
| C24  | 73(3)    | 82(3)    | 48(2)    | 1(2)      | 11(2)    | -11(2)    |
| C25  | 74(3)    | 65(3)    | 46(2)    | -7.5(19)  | 8(2)     | -1(2)     |
| C26  | 64(2)    | 55(2)    | 41.4(19) | -7.0(17)  | 0.9(18)  | -8.9(19)  |

**Table S3 Anisotropic Displacement Parameters ( $\text{\AA}^2 \times 10^3$ ) for 3i. The Anisotropic displacement factor exponent takes the form:  $-2\pi^2[h^2a^{*2}U_{11}+2hka^*b^*U_{12}+\dots]$ .**

| Atom | $U_{11}$ | $U_{22}$ | $U_{33}$ | $U_{23}$ | $U_{13}$ | $U_{12}$ |
|------|----------|----------|----------|----------|----------|----------|
| C27  | 71(3)    | 55(2)    | 50(2)    | -5.5(19) | 1(2)     | -4(2)    |
| C28  | 94(4)    | 52(3)    | 93(4)    | -3(3)    | 26(3)    | -19(2)   |
| C29  | 84(3)    | 51(2)    | 46(2)    | -3.8(18) | -5(2)    | -6(2)    |
| C30  | 90(3)    | 50(2)    | 58(2)    | -7(2)    | -3(2)    | -8(2)    |
| C31  | 101(4)   | 52(2)    | 56(2)    | -2(2)    | 2(3)     | 1(2)     |
| C32  | 81(3)    | 59(3)    | 46(2)    | 2.9(19)  | -4(2)    | 2(2)     |
| C33  | 90(3)    | 59(2)    | 57(2)    | -13(2)   | -6(2)    | -7(2)    |
| C34  | 86(3)    | 55(3)    | 60(3)    | -14(2)   | -6(2)    | -4(2)    |

**Table S4 Bond Lengths for 3i.**

| Atom | Atom | Length/ $\text{\AA}$ | Atom | Atom | Length/ $\text{\AA}$ |
|------|------|----------------------|------|------|----------------------|
| Br1  | C32  | 1.918(5)             | C15  | C16  | 1.406(10)            |
| O1   | C28  | 1.197(7)             | C15  | C20  | 1.375(10)            |
| N1   | C27  | 1.425(6)             | C16  | C17  | 1.384(15)            |
| N1   | C29  | 1.369(7)             | C17  | C18  | 1.44(3)              |
| C1   | C2   | 1.511(7)             | C18  | C19  | 1.22(3)              |
| C1   | C8   | 1.330(7)             | C19  | C20  | 1.378(16)            |
| C1   | C21  | 1.511(7)             | C21  | C22  | 1.410(7)             |
| C2   | C3   | 1.369(7)             | C21  | C26  | 1.399(7)             |
| C2   | C7   | 1.386(7)             | C22  | C23  | 1.392(7)             |
| C3   | C4   | 1.355(9)             | C22  | C28  | 1.467(8)             |
| C4   | C5   | 1.373(11)            | C23  | C24  | 1.364(8)             |
| C5   | C6   | 1.396(11)            | C24  | C25  | 1.387(7)             |

**Table S4 Bond Lengths for 3i.**

| Atom | Atom | Length/Å  | Atom | Atom | Length/Å |
|------|------|-----------|------|------|----------|
| C6   | C7   | 1.369(9)  | C25  | C26  | 1.387(6) |
| C8   | C9   | 1.515(7)  | C26  | C27  | 1.526(6) |
| C8   | C15  | 1.483(8)  | C29  | C30  | 1.402(7) |
| C9   | C10  | 1.372(7)  | C29  | C34  | 1.398(7) |
| C9   | C14  | 1.390(7)  | C30  | C31  | 1.377(8) |
| C10  | C11  | 1.365(8)  | C31  | C32  | 1.387(7) |
| C11  | C12  | 1.356(9)  | C32  | C33  | 1.358(7) |
| C12  | C13  | 1.365(10) | C33  | C34  | 1.382(8) |
| C13  | C14  | 1.394(9)  |      |      |          |

**Table S5 Bond Angles for 3i.**

| Atom | Atom | Atom | Angle/°  | Atom | Atom | Atom | Angle/°   |
|------|------|------|----------|------|------|------|-----------|
| C29  | N1   | C27  | 122.9(4) | C19  | C18  | C17  | 120.7(13) |
| C2   | C1   | C21  | 116.3(4) | C18  | C19  | C20  | 125.1(19) |
| C8   | C1   | C2   | 121.9(5) | C15  | C20  | C19  | 118.7(12) |
| C8   | C1   | C21  | 121.7(5) | C22  | C21  | C1   | 118.9(4)  |
| C3   | C2   | C1   | 120.8(5) | C26  | C21  | C1   | 121.3(4)  |
| C3   | C2   | C7   | 118.9(5) | C26  | C21  | C22  | 119.5(4)  |
| C7   | C2   | C1   | 120.2(5) | C21  | C22  | C28  | 121.7(4)  |
| C4   | C3   | C2   | 121.2(6) | C23  | C22  | C21  | 119.7(5)  |
| C3   | C4   | C5   | 119.9(6) | C23  | C22  | C28  | 118.6(5)  |
| C4   | C5   | C6   | 120.5(6) | C24  | C23  | C22  | 120.3(5)  |
| C7   | C6   | C5   | 118.4(6) | C23  | C24  | C25  | 120.5(4)  |
| C6   | C7   | C2   | 121.1(6) | C26  | C25  | C24  | 120.8(5)  |

**Table S5 Bond Angles for 3i.**

| Atom | Atom | Atom | Angle/°   | Atom | Atom | Atom | Angle/°  |
|------|------|------|-----------|------|------|------|----------|
| C1   | C8   | C9   | 121.5(5)  | C21  | C26  | C27  | 121.0(4) |
| C1   | C8   | C15  | 123.0(5)  | C25  | C26  | C21  | 119.2(4) |
| C15  | C8   | C9   | 115.4(4)  | C25  | C26  | C27  | 119.8(4) |
| C10  | C9   | C8   | 121.5(4)  | N1   | C27  | C26  | 115.3(4) |
| C10  | C9   | C14  | 119.3(5)  | O1   | C28  | C22  | 124.9(5) |
| C14  | C9   | C8   | 118.9(5)  | N1   | C29  | C30  | 120.4(4) |
| C11  | C10  | C9   | 121.0(5)  | N1   | C29  | C34  | 122.9(5) |
| C12  | C11  | C10  | 120.1(6)  | C34  | C29  | C30  | 116.7(5) |
| C11  | C12  | C13  | 120.4(5)  | C31  | C30  | C29  | 122.4(5) |
| C12  | C13  | C14  | 120.3(5)  | C30  | C31  | C32  | 118.3(5) |
| C9   | C14  | C13  | 118.8(6)  | C31  | C32  | Br1  | 118.9(4) |
| C16  | C15  | C8   | 117.5(6)  | C33  | C32  | Br1  | 119.7(4) |
| C20  | C15  | C8   | 124.0(7)  | C33  | C32  | C31  | 121.4(5) |
| C20  | C15  | C16  | 118.3(7)  | C32  | C33  | C34  | 119.9(5) |
| C17  | C16  | C15  | 120.2(13) | C33  | C34  | C29  | 121.4(5) |
| C16  | C17  | C18  | 117.1(15) |      |      |      |          |

**Table S6 Torsion Angles for 3i.**

| A   | B   | C   | D   | Angle/°   | A   | B   | C   | D   | Angle/°  |
|-----|-----|-----|-----|-----------|-----|-----|-----|-----|----------|
| Br1 | C32 | C33 | C34 | 178.8(4)  | C14 | C9  | C10 | C11 | 0.7(8)   |
| N1  | C29 | C30 | C31 | -179.8(5) | C15 | C8  | C9  | C10 | 120.0(6) |
| N1  | C29 | C34 | C33 | -179.5(5) | C15 | C8  | C9  | C14 | -53.5(7) |
| C1  | C2  | C3  | C4  | -177.0(5) | C15 | C16 | C17 | C18 | 0.1(15)  |
| C1  | C2  | C7  | C6  | 178.1(6)  | C16 | C15 | C20 | C19 | -0.8(9)  |

**Table S6 Torsion Angles for 3i.**

| <b>A</b> | <b>B</b> | <b>C</b> | <b>D</b> | <b>Angle/°</b> | <b>A</b> | <b>B</b> | <b>C</b> | <b>D</b> | <b>Angle/°</b> |
|----------|----------|----------|----------|----------------|----------|----------|----------|----------|----------------|
| C1       | C8       | C9       | C10      | -55.9(7)       | C16      | C17      | C18      | C19      | 1(2)           |
| C1       | C8       | C9       | C14      | 130.6(6)       | C17      | C18      | C19      | C20      | -1(3)          |
| C1       | C8       | C15      | C16      | 139.2(6)       | C18      | C19      | C20      | C15      | 1.5(19)        |
| C1       | C8       | C15      | C20      | -46.8(8)       | C20      | C15      | C16      | C17      | 0.1(10)        |
| C1       | C21      | C22      | C23      | 174.4(5)       | C21      | C1       | C2       | C3       | 128.6(5)       |
| C1       | C21      | C22      | C28      | -8.1(8)        | C21      | C1       | C2       | C7       | -47.4(6)       |
| C1       | C21      | C26      | C25      | -173.9(4)      | C21      | C1       | C8       | C9       | 169.5(4)       |
| C1       | C21      | C26      | C27      | 3.7(7)         | C21      | C1       | C8       | C15      | -6.1(8)        |
| C2       | C1       | C8       | C9       | -8.8(7)        | C21      | C22      | C23      | C24      | -0.3(8)        |
| C2       | C1       | C8       | C15      | 175.6(5)       | C21      | C22      | C28      | O1       | 177.3(6)       |
| C2       | C1       | C21      | C22      | -69.0(6)       | C21      | C26      | C27      | N1       | 175.5(4)       |
| C2       | C1       | C21      | C26      | 104.7(5)       | C22      | C21      | C26      | C25      | -0.2(7)        |
| C2       | C3       | C4       | C5       | -0.4(10)       | C22      | C21      | C26      | C27      | 177.4(4)       |
| C3       | C2       | C7       | C6       | 2.0(9)         | C22      | C23      | C24      | C25      | -0.3(8)        |
| C3       | C4       | C5       | C6       | 0.7(12)        | C23      | C22      | C28      | O1       | -5.2(9)        |
| C4       | C5       | C6       | C7       | 0.4(12)        | C23      | C24      | C25      | C26      | 0.6(8)         |
| C5       | C6       | C7       | C2       | -1.7(11)       | C24      | C25      | C26      | C21      | -0.4(7)        |
| C7       | C2       | C3       | C4       | -0.9(8)        | C24      | C25      | C26      | C27      | -178.0(4)      |
| C8       | C1       | C2       | C3       | -53.0(7)       | C25      | C26      | C27      | N1       | -6.9(6)        |
| C8       | C1       | C2       | C7       | 131.0(5)       | C26      | C21      | C22      | C23      | 0.5(7)         |
| C8       | C1       | C21      | C22      | 112.6(6)       | C26      | C21      | C22      | C28      | 178.0(5)       |
| C8       | C1       | C21      | C26      | -73.7(6)       | C27      | N1       | C29      | C30      | -175.8(5)      |
| C8       | C9       | C10      | C11      | -172.8(5)      | C27      | N1       | C29      | C34      | 5.5(7)         |
| C8       | C9       | C14      | C13      | 173.2(6)       | C28      | C22      | C23      | C24      | -177.9(5)      |

**Table S6 Torsion Angles for 3i.**

| A   | B   | C   | D   | Angle/°   | A   | B   | C   | D   | Angle/°   |
|-----|-----|-----|-----|-----------|-----|-----|-----|-----|-----------|
| C8  | C15 | C16 | C17 | 174.4(7)  | C29 | N1  | C27 | C26 | -78.3(6)  |
| C8  | C15 | C20 | C19 | -174.7(6) | C29 | C30 | C31 | C32 | -0.4(7)   |
| C9  | C8  | C15 | C16 | -36.7(7)  | C30 | C29 | C34 | C33 | 1.7(8)    |
| C9  | C8  | C15 | C20 | 137.3(5)  | C30 | C31 | C32 | Br1 | -178.0(4) |
| C9  | C10 | C11 | C12 | -1.9(9)   | C30 | C31 | C32 | C33 | 0.9(7)    |
| C10 | C9  | C14 | C13 | -0.5(9)   | C31 | C32 | C33 | C34 | -0.2(8)   |
| C10 | C11 | C12 | C13 | 3.0(10)   | C32 | C33 | C34 | C29 | -1.2(8)   |
| C11 | C12 | C13 | C14 | -2.8(11)  | C34 | C29 | C30 | C31 | -0.9(7)   |
| C12 | C13 | C14 | C9  | 1.5(10)   |     |     |     |     |           |

**Table S7 Hydrogen Atom Coordinates ( $\text{\AA} \times 10^4$ ) and Isotropic Displacement Parameters ( $\text{\AA}^2 \times 10^3$ ) for 3i.**

| Atom | x        | y       | z       | U(eq) |
|------|----------|---------|---------|-------|
| H1   | 5594.03  | 5451.63 | 7226.38 | 79    |
| H3   | 9124.5   | -413.35 | 6712.75 | 90    |
| H4   | 11270.81 | -789.63 | 6846.74 | 112   |
| H5   | 12158.98 | 477.44  | 7170.05 | 127   |
| H6   | 10855.33 | 2128.48 | 7366.4  | 117   |
| H7   | 8667.55  | 2438.07 | 7234.73 | 89    |
| H10  | 8941.49  | 3185.19 | 6606.1  | 74    |
| H11  | 10348.5  | 3682.98 | 6277.26 | 93    |
| H12  | 10324.82 | 2393.98 | 5920.32 | 98    |
| H13  | 8750.69  | 727.18  | 5872.35 | 107   |
| H14  | 7294.47  | 203.14  | 6203.15 | 92    |

**Table S7 Hydrogen Atom Coordinates ( $\text{\AA}\times 10^4$ ) and Isotropic Displacement Parameters ( $\text{\AA}^2\times 10^3$ ) for 3i.**

| <b>Atom</b> | <b>x</b> | <b>y</b> | <b>z</b> | <b>U(eq)</b> |
|-------------|----------|----------|----------|--------------|
| H16         | 5895.01  | 3112.5   | 6316.84  | 132          |
| H17         | 3741.14  | 3206.87  | 6141.72  | 230          |
| H18         | 2115.31  | 1610.27  | 6286.31  | 288          |
| H19         | 2609.42  | 195.56   | 6568.99  | 250          |
| H20         | 4697.13  | -5.5     | 6744.26  | 141          |
| H23         | 4915.79  | -734.46  | 7503.28  | 80           |
| H24         | 3937.1   | 1233.86  | 7632.43  | 81           |
| H25         | 4389.81  | 3226.73  | 7425.13  | 74           |
| H27A        | 6912.46  | 3965.36  | 7057.29  | 70           |
| H27B        | 5785.56  | 3669.89  | 6853.32  | 70           |
| H28         | 7047.63  | -1221.99 | 6981.82  | 95           |
| H30         | 3726.65  | 6906.97  | 7234.13  | 79           |
| H31         | 1529.35  | 7356.98  | 7124.31  | 83           |
| H33         | 1390.69  | 3903.58  | 6736.37  | 82           |
| H34         | 3572.19  | 3426.18  | 6853.3   | 81           |

## 10. Reference

1. W. Bao, S.-Q. Qiu, S.-H. Wang, H.-H. Liu, S.-H. Xiang and B. Tan, *Angew. Chem. Int. Ed.*, 2025, **64**, e202519340.
